# Supplementary material for: Developing post-modified Ce-MOF as a photocatalyst: a detail mechanistic insight into CO2 reduction toward selective C2 product formation
Source: Royal Society of Chemistry journal article supplement (doi:10.1039/d2ee03755f), 2023-01-01
Supplement: d2ee03755f1.pdf [file d2ee03755f1.pdf]

## Supporting Information

### **Developing Post-Modified Ce-MOF as Photocatalyst: A Detail Mechanistic insight of CO<sub>2</sub> Reduction towards Selective C<sub>2</sub> Product Formation**

Sanchita Karmakar<sup>a</sup>, Soumitra Barman<sup>a</sup>, Faruk Ahamed Rahimi<sup>a</sup>, Sandip Biswas<sup>a</sup>, Sukhendu Nath<sup>b</sup>  
and Tapas Kumar Maji<sup>\*a</sup>

<sup>a</sup>Molecular Materials Laboratory, Chemistry and Physics of Material Unit (CPMU), School of Advance Material (SAMat), Jawaharlal Nehru Centre for Advanced Scientific Research, Jakkur, Bangalore-560064, India

<sup>b</sup>Ultrafast Spectroscopy Section, Radiation & Photochemistry Division, Bhabha Atomic Research Centre, Mumbai 400 085, India.

\*Email: [tmaji@jncasr.ac.in](mailto:tmaji@jncasr.ac.in); Tel: 91-8022082826

## **Experimental section:**

**Materials:** All the reagents were commercially available and used as such without further purification. Ammonium cerium (IV) nitrate  $[(\text{NH}_4)_2\text{Ce}(\text{NO}_3)_6]$ , purity  $\geq 98\%$ , 2,2'-Bipyridine-5,5'-dicarboxylic acid were purchased from TCI chemicals. Ruthenium chloride ( $\text{RuCl}_3 \cdot 3\text{H}_2\text{O}$ ) and 2,2'-bipyridine were purchased from Sigma-Aldrich Chemical Co. Ltd. N,N'-Dimethylformamide (DMF) and anhydrous acetone were purchased from Spectrochem Pvt. Ltd. All the photophysical studies were carried out using HPLC grade solvents.  $^{13}\text{C}$  cylinder was purchased from Sigma-Aldrich Chemical Co. Ltd.

## **Methods**

### **Physical measurement:**

Elemental analyses were performed in Thermo Scientific Flash 2000 CHN analyzer. Bruker FT-IR spectrometer was used to record infrared spectra. Samples were prepared as pellets using KBr for IR measurement.  $^1\text{H}$  NMR spectra were recorded on Bruker AVANCE-400 spectrometer (at 400 MHz) with chemical shifts recorded as ppm, and all spectra were calibrated against TMS. Mettler Toledo-TGA 850 instrument was used to measure the thermal stability in  $\text{N}_2$  atmosphere within the temperature range 30-800 °C at a heating rate of 5 °C/min. Powder X-ray diffraction patterns for all the MOFs were recorded in Bruker D8 discover instrument using  $\text{Cu-K}_\alpha$  radiation. Morphological studies have been carried out using Bruker Leica-S440I Field Emission Scanning Electron Microscope (FE-SEM) by placing samples on a silicon wafer under a high vacuum with an accelerating voltage of 100 kV. Transmission Electron Microscopy (TEM) analysis has been performed using JEOL JEM-3010 with an accelerating voltage at 300 kV.  $\text{N}_2$  adsorption measurements were carried out at 77 K in a QUANTACHROME QUADRASORD-SI analyzer. Samples were degassed at 100 °C and  $1 \times 10^{-1}$  Pa vacuum for 12 h before performing adsorption isotherm measurement. UV-vis studies were performed in solid state using Perkin Elmer Model Lambda 900 spectrophotometer instrument. The photoluminescence properties were performed in Fluorolog 3.21 spectrofluorimeter (Horiba Jobin-Yvon) instrument. The photoluminescence (PL) quantum yield was determined by an absolute method using the same fluorescence spectrometer equipped with a 120 mm integrating sphere with BENFLEC

coated inner face (Horiba Instruments). Fluorescence decay profiles were recorded using a Horiba Delta Flex time correlated single-photon-counting (TCSPC) instrument. A 405 nm laser diode with a pulse repetition rate of 1 MHz was used as the light source. The instrument response function (IRF) was collected using a scatterer (Ludox AS40 colloidal silica, Sigma-Aldrich).

### **XAS experiment:**

XAS experiments at 300 K were performed at PETRA III, beamline P64, of DESY, Germany. Measurements of Ce-L3 edge and Ru K-edge were performed at ambient pressure in fluorescence as well as transmission mode using gas ionization chambers to monitor the incident and transmitted X-ray intensities. Monochromatic X-rays were obtained using a Si (111) double crystal monochromator which was calibrated by defining the inflexion point (first derivative maxima) of Ce foil as 5723 eV and Ru foil as 22117 eV. The beam was focused by employing a Kirkpatrick-Baez (K-B) mirror optic. Rhodium-coated X-ray mirror was used to suppress higher-order harmonics. A CCD detector was used to record the transmitted signals. Pellets for the ex-situ measurements were made by homogeneously mixing the sample with an inert boronitride matrix to obtain an X-ray absorption edge jump close to one. X-ray absorption near edge spectra (XANES) of the XAS spectrum were obtained by subtracting the pre-edge background from the overall absorption and normalizing to the spline fit using ATHENA software package. The  $k^2$  -weighted extended X-ray absorption fine structure (EXAFS) was Fourier transformed over the limited range of  $k$  from 3 to 14  $\text{\AA}^{-1}$ .

The normalized, energy-calibrated Ce L<sub>3</sub>-edge and Ru K-edge XANES spectra were obtained using standard data reduction techniques with Athena and Artemis software. The concentration of Ce<sup>3+</sup> in both samples (Ce-MOF and Ce-MOF-Ru<sup>II</sup>-bpy) was calculated using the following equations:

$$[Ce^{3+}] = A(Ce^{3+}) / (A(Ce^{3+}) + A(Ce^{4+}))$$

Where,  $A(Ce^{3+})$  and  $A(Ce^{4+})$  correspond to the total integrated peak areas of the Ce<sup>3+</sup> and Ce<sup>4+</sup> associated peaks, respectively.

The EXAFS oscillations  $\chi(k)$  as a function of photoelectron wave number  $k$  was extracted by following standard procedures. The theoretical paths were generated using FEFF and the

models were completed in a conventional way using a fitting program named Artemis. The theoretical phase and amplitude functions of Ru-N were calculated with FEFF.<sup>1</sup> CIF file was obtained for CCDC (No: 2005064). The values for the amplitude reduction factor ( $S_0^2$ ) and the mean square disorder ( $\sigma^2$ ) were determined by fitting the corresponding cif with FEFF. The EXAFS parameters were obtained by a least-squares fit in the R-space of the  $k^2$ -weighted Fourier transform (FT) data. Artemis evaluates a variety of statistical parameters relevant to the evaluation of the fit. For example,  $E_0$  is rarely more than 10 eV or less than -10 eV, that  $S_0^2$  and  $\sigma^2$  should never be negative.  $\sigma^2$  value in the range between 0.001 and 0.01 will not be got a penalty. ARTEMIS software thinks any fit which R-factor has 2% or less misfit between data and theory is not assessed a penalty.

#### **TGA-MS:**

TGA-MS measurement was carried out by TG-GCMS interface analyzer (PerkinElmer *TL 8500*). 8.2 mg Ce-MOF was heated on a *TL 8500* thermogravimetric analyzer from 30 °C to 650 °C at a rate of 5 °C min<sup>-1</sup> under N<sub>2</sub> flow of 100 ml /min. The TGA instrument is equipped with a quadrupole mass spectrometer (MS) (Clarus<sup>®</sup> SQ 8T) to investigate the chemical nature of the species leaving the sample in the TGA run.

#### **Transient absorption.**

Transient absorption experiments were performed using an amplified Ti:sapphire laser (800 nm, 60 fs, 1 kHz, 3 mJ) from Amplitude Technologies, France and a pump-probe setup (Excipro) from CDP corporation Russia. For sample excitation, 400 nm laser pulse were generated from 800 nm fundamental light using a BBO crystal. For probing the transient species, a broad band (350–750 nm) pulse was generated by putting small amount of 800 nm laser pulse onto a rotating calcium fluoride plate. The pump and probe pulse was spatially overlapped in the rotating sample cell with 1mm optical path. The time-delay between the pump and probe pulse was maintained with the help of a stepper motor controlled optical delay stage. To get a pump induced changes in the optical absorbance in the sample the repetition rate of pump pulse was modulated to 500 Hz using a mechanical chopper. The probe pulse was dispersed in spectrograph and detected with photodiode array. The instrument response function of the TA set-up was 120 fs. For all TA experiments samples were dispersed in ethylene glycol.

#### **Photocatalytic reaction:**

The photocatalytic CO<sub>2</sub> reduction experiments were carried out in a 30 ml stopper vessel with magnetic stirring. 5 mg of the photocatalyst was dispersed in 10 ml water, and then pure CO<sub>2</sub> (99.99%) gas was passed into the reactor containing a well-dispersed solution for 1 h. The reaction mixture was irradiated with a 300 W Xenon lamp (Newport) through a visible bandpass filter (400–800nm) with constant stirring. We have measured the intensity of the light source using a power meter (Newport-843-R). The measured intensity during the catalytic reaction ( $\lambda = 400\text{--}800$ ) is 99.5 mW/cm<sup>2</sup>. (Note: The distance between light source and reactor is 8 cm.).

The gaseous products were analyzed using gas chromatography Mass Spectrometry SHIMADZU GC-2010 PLUS). The amount of products was quantified by using RT® Molecular sieve 5A column (45 m, 0.32 mm ID, 30  $\mu$ m df) with a mass detector. The calibration was done by a standard gas mixture of H<sub>2</sub>, CO, CH<sub>4</sub> of different concentrations in ppm-level. Importantly, GC-MS has a detection limit of 1.0 ppm for H<sub>2</sub>, CO and CH<sub>4</sub>. After the photocatalysis, the reaction mixture was filtered to remove the residual solid, and the solution was further analyzed to determine the amount of liquid product. 0.6 mL liquid product dispersed in 0.05 mL D<sub>2</sub>O was analyzed by NMR spectroscopy (AVANCE-400 spectrometer at 400 MHz) using 50  $\mu$ L solution of 4 mM DMSO and 20 mM phenol as the external standard. For <sup>13</sup>CO<sub>2</sub> experiment, the reaction mixture was purged with <sup>13</sup>CO<sub>2</sub>. The content of H<sub>2</sub>O<sub>2</sub> produced during the photocatalytic water splitting was measured by a UV-vis spectrophotometer. In an acidic environment (pH=1–2), Fe<sup>2+</sup> can be oxidized into Fe<sup>3+</sup> by H<sub>2</sub>O<sub>2</sub>, and Fe<sup>3+</sup> can be combined with KSCN to form [Fe(SCN)]<sup>2+</sup>. [Fe(SCN)]<sup>2+</sup> has a maximum absorption peak at 447 nm.

**Selectivity was calculated by using this equation:**

$$Selectivity_{CH_3COOH} = \frac{8 * n_{CH_3COOH}}{(8 * n_{CH_3COOH}) + (2 * n_{H_2})} \times 100 \%$$

**Computational details:**

All the calculations are performed using density functional theory (DFT) in Gaussian 16 package of programs.<sup>2</sup> The calculations are performed utilizing B3LYP exchange-correlation functional along with 6-31G(d) basis set for all atoms except for Ru and Ce atoms.<sup>3-8</sup> For Ru

LANL2DZ, which utilizes a widely used effective core potential (ECP)- type basis set is used.<sup>9,10</sup> Whereas for Ce ECP-MWB28 basis set is used.<sup>11</sup> The implicit solvent effect of water is incorporated into all computations by polarisable continuum model (PCM).<sup>12</sup> Grimme's d3 dispersion is also used to tackle weak interactions.<sup>4</sup> The harmonic vibrational frequency analysis of the optimized geometries is performed to confirm the nature of stationary points. All the optimized intermediates revealed the absence of any imaginary vibrational mode, indicating the optimized geometries as minima on the potential energy surface (PES). The electronic absorption spectra are calculated using time-dependent DFT (TDDFT) method using the same level of theory as earlier. All thermochemical data are obtained with the ideal gas-rigid rotor-simple harmonic oscillator approximations at 298.15 K and 1 atm. Zero point-energy corrections are included in the Gibbs free energy values along with a concentration correction for  $c = 1 \text{ mol/ dm}^3$  condition in the solvent. The pictures of the optimized structures, molecular orbitals and spin density plots are taken from Gauss View 6.0.16.<sup>13</sup>

### **Electrochemical setup:**

The Mott-Schottky and impedance measurement were carried out with a CHI760E workstation (CHI Instruments, USA) *via* a conventional three-electrode system in a 0.2 M Na<sub>2</sub>SO<sub>4</sub> aqueous solution.

**Preparation of working electrode for Mott-Schottky and impedance measurement:** 2.5 mg of Ce-MOF-Ru<sup>II</sup>-bpy was dispersed in a solution of 250  $\mu\text{L}$  water, 250  $\mu\text{L}$  isopropyl alcohol (IPA) and 10  $\mu\text{L}$  of Nafion to prepare a homogenous slurry. Subsequently, 12  $\mu\text{L}$  of the slurry was coated on a glassy carbon electrode and then dried at room temperature. The Ag/AgCl electrode was employed as the reference electrode, and the platinum plate was used as the counter electrode, respectively. During impedance measurement, a white LED lamp (LEICA KL1600 LED) was used for illumination.

### **Preparation of working electrode for transient photocurrent:**

2.5 mg of compound (Ce-MOF and Ce-MOF-Ru<sup>II</sup>-bpy) was dispersed in a solution of 250  $\mu\text{L}$  water, 250  $\mu\text{L}$  isopropyl alcohol (IPA) and 10  $\mu\text{L}$  of nafion to prepare a homogenous slurry. Subsequently, 300  $\mu\text{L}$  of the slurry was coated on ITO glass plate (1 cm x 1 cm) and then dried in room temperature. The Ag/AgCl electrode was employed as the reference electrode, and platinum plate was used as the counter electrode, respectively. The transient

photocurrent responses were carried out under visible-light irradiation conditions (300 W Xenon arc lamp).

### Spectroelectrochemical set-up for *in-situ* UV-vis spectral changes under visible light irradiation:

*In-situ* UV-vis spectroscopy was carried out using an ocean optics set-up (Ser No: 057781227). The change of absorption spectra was monitored by dispersing **Ce-MOF-Ru<sup>II</sup>-bpy** in aqueous medium. During the measurement, sample was irradiated with a visible light source (Leica KL1600 LED), and monitored the intensity change with pre and post-light irradiation. The light illumination time was 10 s before collecting any absorption spectra.

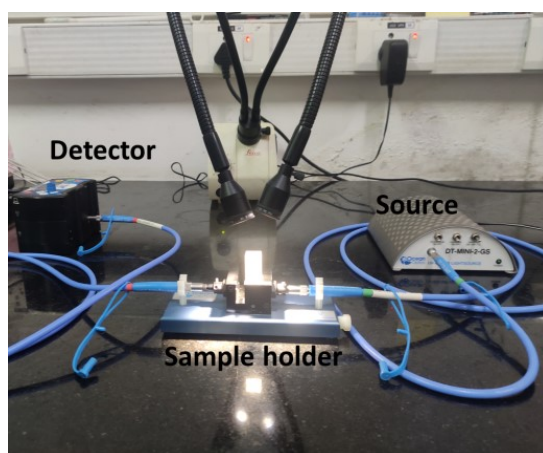

**Scheme S1:** Photograph of the *in-situ* UV-vis spectroscopy set-up.

**Synthesis of Ce-UiO-66-bpydc (Ce-MOF) :** Ce-UiO-66-bpydc was prepared by following a slight modification of the reported procedure. 2,2'-Bipyridine-5,5'-dicarboxylic acid (H<sub>2</sub>bpydc, 52.1 mg, 213 μmol) was introduced into the glass reactor under inert conditions. After the addition of N,N-dimethylformamide (DMF; 1.2 mL), an aqueous solution of cerium(IV) ammonium nitrate [NH<sub>4</sub>]<sub>2</sub>[Ce(NO<sub>3</sub>)<sub>6</sub>] (400 μL, 0.533 M) was added to the mixture. The glass reactor was sealed and heated under stirring for 15 min at 100 °C. The yellow precipitate was centrifuged in the mother liquor, which was then decanted off before being re-dispersed twice in DMF (2 mL). To remove DMF from the product, the solid was washed afterwards and centrifuged with acetone (2 mL) four times. The resulting white solid was dried in air at 70 °C. Yield: 45 mg (38%).

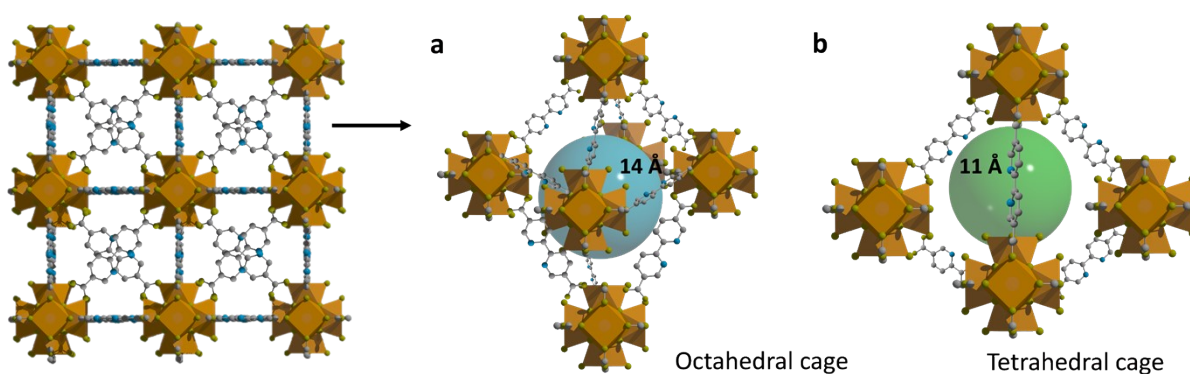

Fig. S1 Octahedral and tetrahedral cages of Ce-MOF.

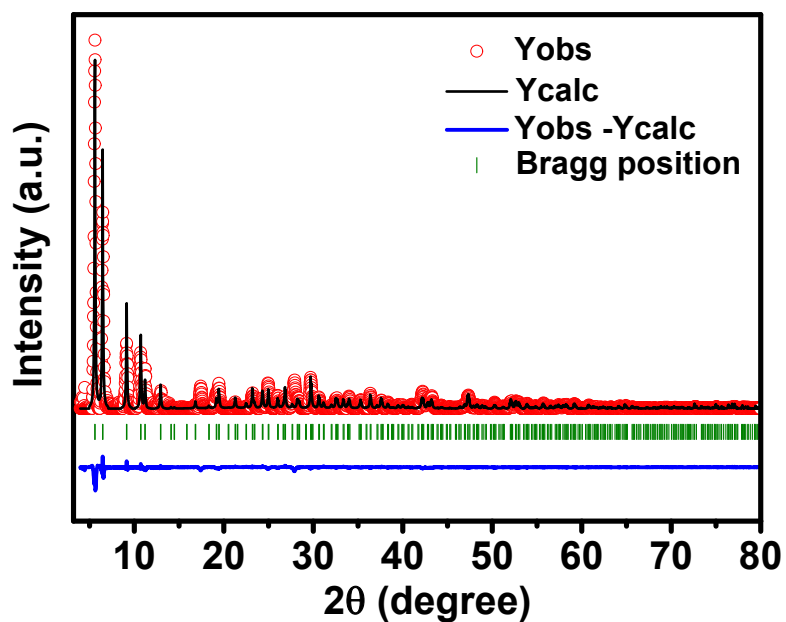

Fig. S2 Le Bail plot of Ce-MOF. The observed PXRD pattern ( $\lambda = 1.5401 \text{ \AA}$ ) is shown in red, the calculated in black and the difference (observed - calculated) of both patterns is given in blue. The allowed positions of the peaks are given as green ticks.

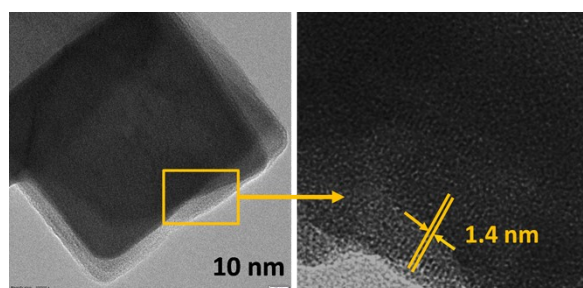

Fig. S3 High-resolution TEM images of Ce-MOF.



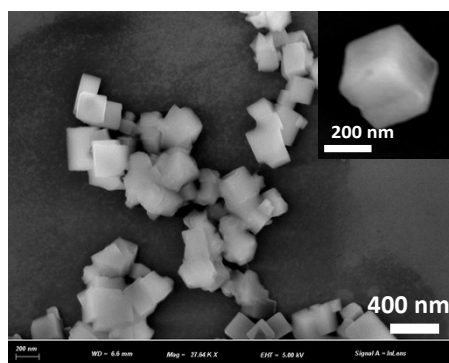

**Fig. S4.** FESEM images of Ce-MOF.

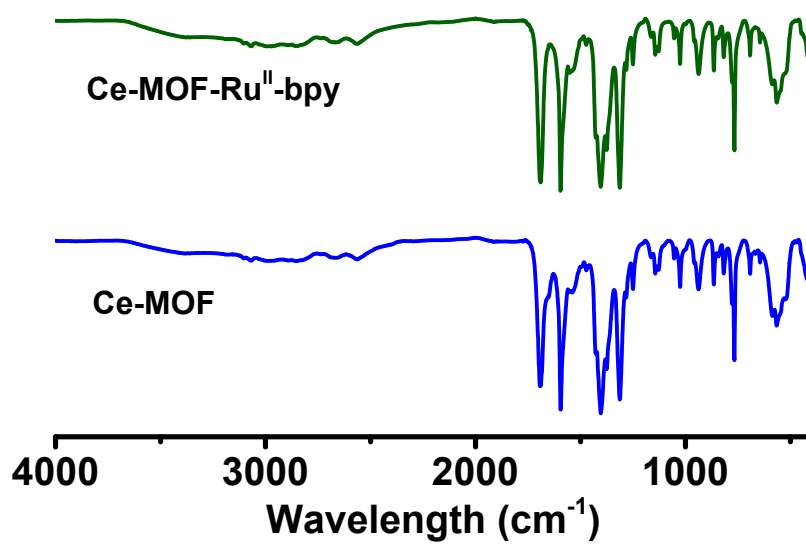

**Fig. S5.** FT-IR spectra of Ce-MOF and Ce-MOF-Ru<sup>II</sup>-bpy.

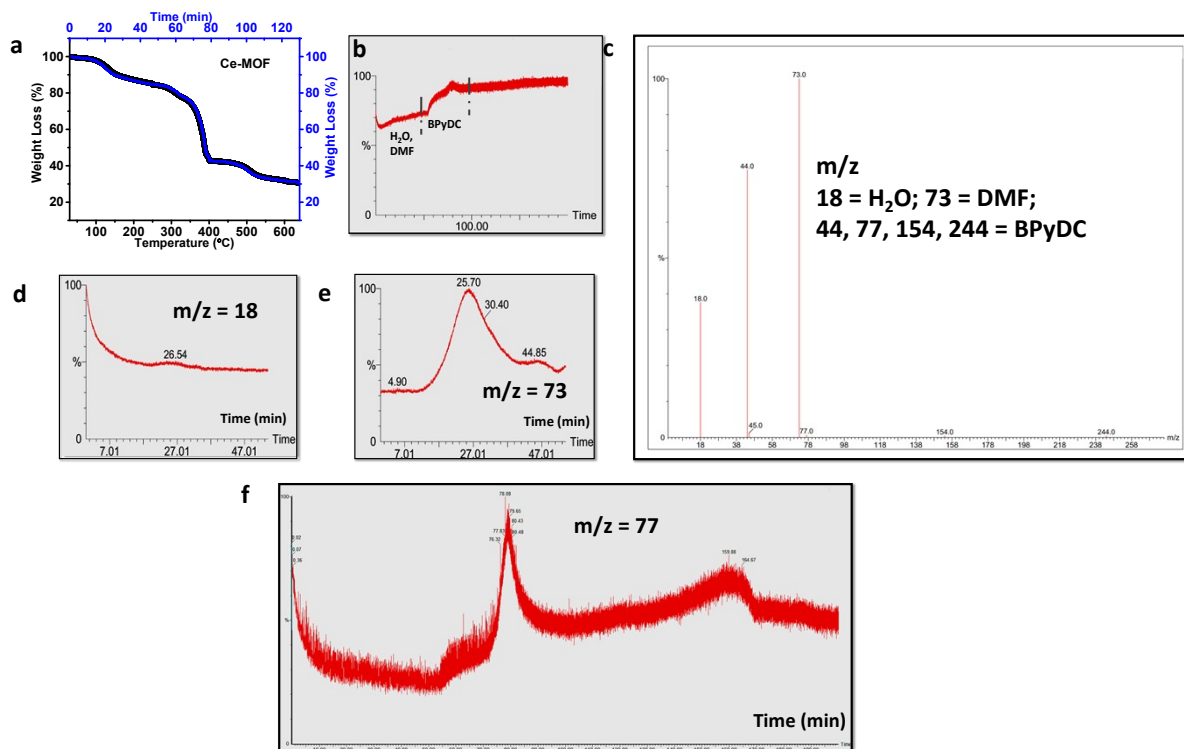

**Fig. S6** Missing Linker defect of **Ce-MOF** investigated by TGA-MS. (a) TGA curve of **Ce-MOF** under  $N_2$  atmosphere. (b) Corresponding mass signal of the **Ce-MOF** comes from the fragmentation of the thermogravimetric analysis. (c)  $m/z$  values of the **Ce-MOF** comes from the fragmentation of the thermogravimetric analysis. (d) Mass signal of water from TGA of **Ce-MOF**. (e) Mass signal of DMF from TGA of **Ce-MOF**. (f) Mass signal of the pyridine comes from the BPyDC linker of **Ce-MOF**.

**Investigating the BpyDC linker weight % from TGA-MS analysis:** The % of bpydc linker defect was calculated from the TGA-MS analysis. The weight loss data of **Ce-MOF** was represented with respect to temperature as well as time, and the corresponding mass signal was plotted with respect to time. Increasing temperature from 30 to 300 °C, **Ce-MOF** showed a progressive structural weight loss along with a clear shoulder band at 100 °C. Corresponding mass spectroscopy data suggested the loss of water and DMF molecule inside the MOF pore or coordinated with the  $Ce_6$  cluster.

$$\text{For defect-free MOF \% of bpydc linker} = \frac{6 * \text{Molecular weight of bpydc}}{\text{Molecular weight of MOF}} * 100 \%$$

$$= \frac{1092.2 \text{ g/mol}}{2063.6 \text{ g/mol}} * 100 \%$$

$$= 52.92 \%$$

From the experiment, weight loss observed was about 44.08 % for the bpydc linker from 300-550 °C. Hence the as-synthesized pristine Ce-MOF exhibiting a difference of 8.84 wt % corresponds to the bpydc linker. This defect arose from missing linker which is well reported in the literature for UiO-66 architecture. Hence the molecular formula for Ce-MOF is  $[\text{Ce}_6\text{O}_5(\text{OH})_3(\text{bpydc})_5(\text{H}_2\text{O})_2]$

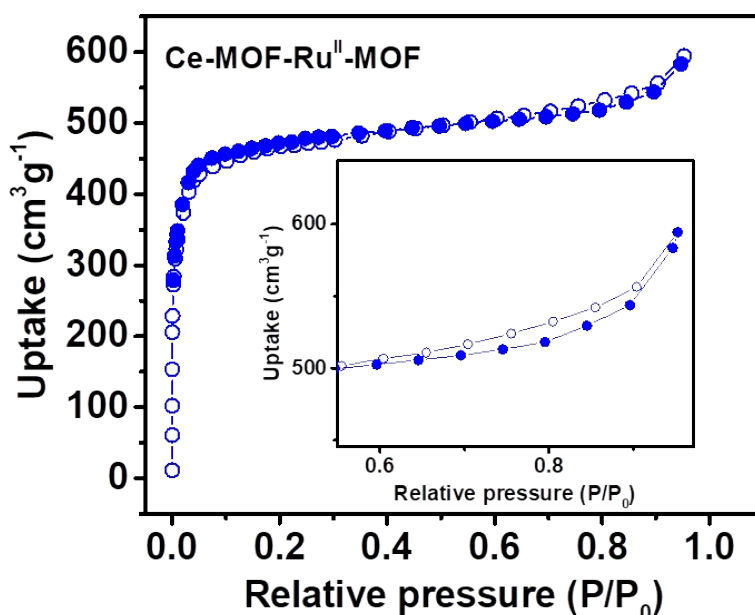

**Fig. S7**  $\text{N}_2$  adsorption-desorption isotherms of Ce-MOF-Ru<sup>II</sup>-MOF. Inset shows the uptake in the pressure region of  $P/P_0$  0.5 to 1.

**Synthesis of  $[\text{Ru}(\text{bpy})_2\text{Cl}_2]$ :**  $[\text{Ru}(\text{bpy})_2\text{Cl}_2]$  was prepared by following a previously reported literature.  $\text{RuCl}_3 \cdot 3\text{H}_2\text{O}$  (1.000 g; 8.824 mmol), 2,2'-bipyridine (1.195 g; 7.649 mmol), and LiCl (1.074 g) were refluxed in a reagent grade dry DMF (10 ml) for 8 h with magnetic stirring. The reaction mixture was cooled to room temperature, and reagent grade acetone (30 ml) was added. The reaction mixture was then cooled to 0°C overnight. The mixture was then filtered, yielding a red-violet filtrate and a black crystalline substance. The solid was washed three times with 10 ml portions of water followed by three 10 ml portions of diethyl ether and was subsequently dried by suction (yield: 0.724 g; 39.1%). A high-resolution mass spectrometry was done. The ESI mass spectrum (Fig. S 8) shows the largest peak at 449 m/z, which is exactly 35 a.u. less than the molecular weight of the product, thus it corresponds to  $[\text{Ru}(\text{bpy})_2\text{Cl}]^+$  (loss of a Cl atom from the product). This may well have occurred during ionization, as attached Cl ligands are very labile and can be easily ionized. There is a small

peak at 484 m/z, indicating that a small amount of the product was ionized without disturbing the Cl ligands.

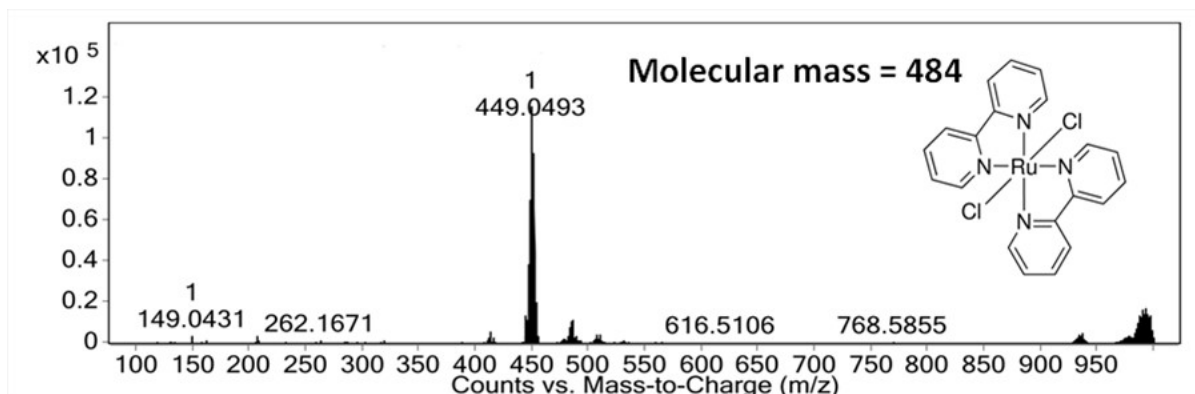

Fig. S8 HRMS of  $[\text{Ru}(\text{bpy})_2\text{Cl}_2]$ .

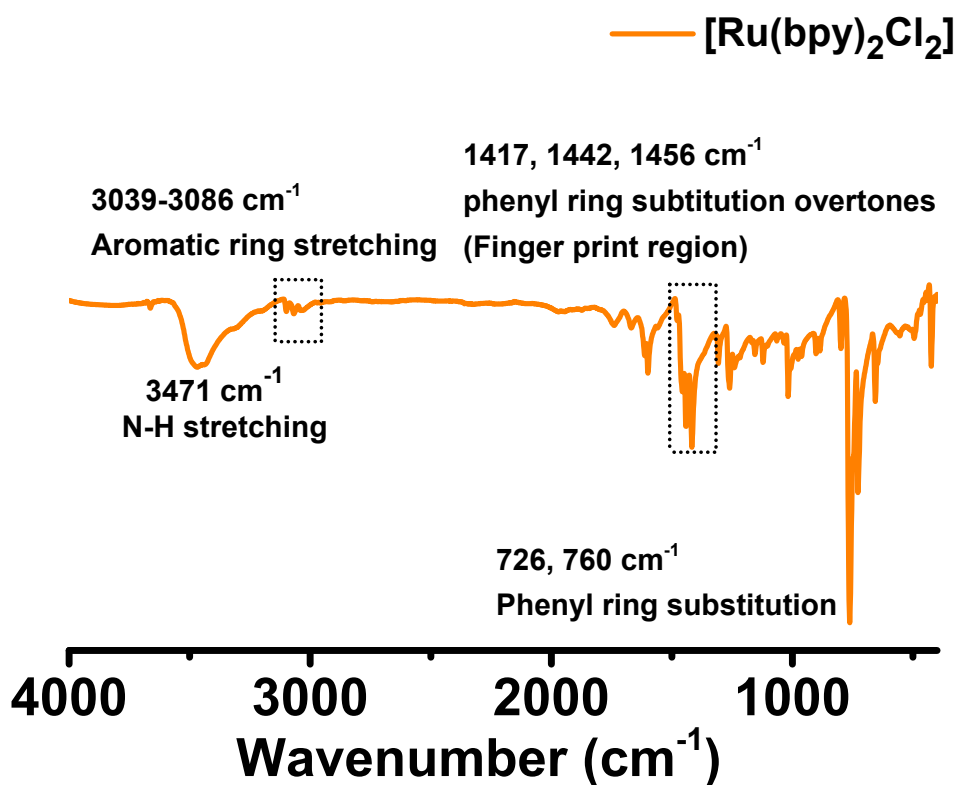

Fig. S9 FT-IR spectra of  $[\text{Ru}(\text{bpy})_2\text{Cl}_2]$ .

**Synthesis of Ce-MOF-Ru<sup>II</sup>-bpy:** Ce-MOF (0.050 g) and  $[\text{Ru}(\text{bpy})_2\text{Cl}_2]$  (2 mg, 3.84  $\mu\text{mol}$ ) were mixed in a 10 mL dry ethanol/toluene (1:1) in a schlenk tube. The suspension was heated at 90°C for 24 h. After the reaction, the product was filtered and washed with toluene

and ethanol to remove excess  $[\text{Ru}(\text{bpy})_2\text{Cl}_2]$ , affording orange colour **Ce-MOF-Ru<sup>II</sup>-bpy**.  
Yield: 0.099 g.

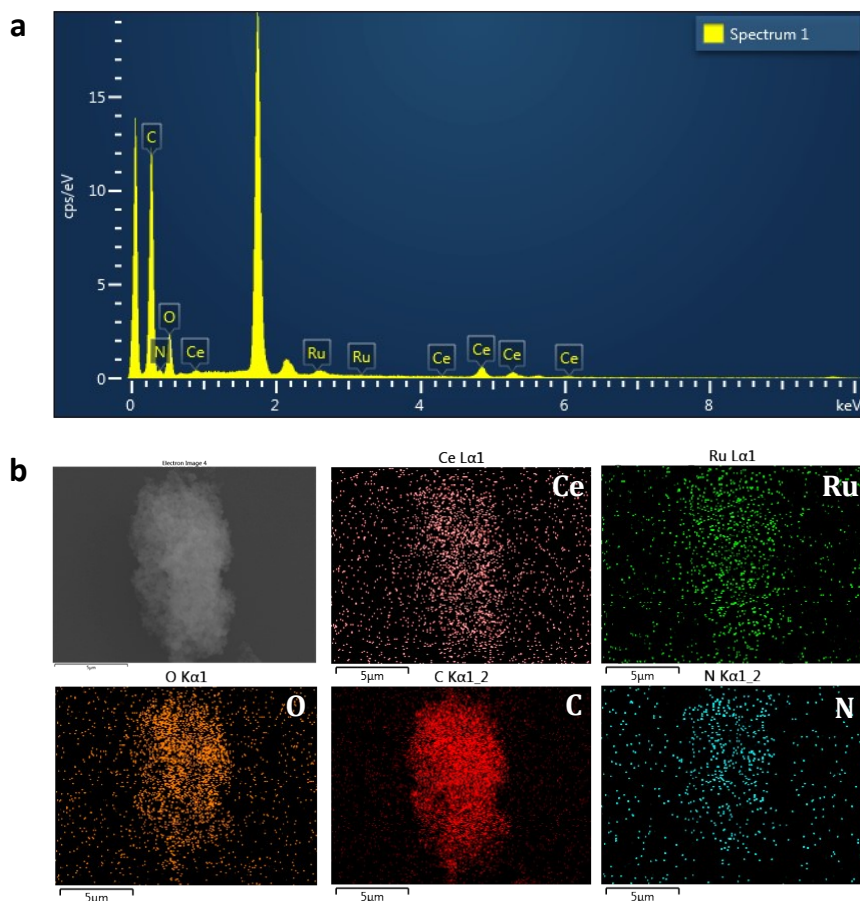

**Fig. S9** EDX and elemental mapping of **Ce-MOF-Ru<sup>II</sup>-bpy**.

**Table S1** Table of Element Wt% from EDX analysis of **Ce-MOF-Ru<sup>II</sup>-bpy**.

| Element | Line Type | Apparent Concentration | k Ratio | Wt%   | Wt% Sigma | Standard Label | Factory Standard | Standard Calibration Date |
|---------|-----------|------------------------|---------|-------|-----------|----------------|------------------|---------------------------|
| C       | K series  | 2.48                   | 0.02480 | 64.30 | 2.97      | C Vit          | Yes              |                           |
| N       | K series  | 0.05                   | 0.00009 | 1.64  | 4.21      | BN             | Yes              |                           |
| O       | K series  | 0.98                   | 0.00329 | 28.81 | 1.64      | SiO2           | Yes              |                           |

|        |          |      |         |        |      |                  |     |  |
|--------|----------|------|---------|--------|------|------------------|-----|--|
| Ru     | L series | 0.01 | 0.00014 | 0.17   | 0.32 | Ru (v)           | Yes |  |
| Ce     | L series | 0.41 | 0.00381 | 5.07   | 0.58 | CeO <sub>2</sub> | Yes |  |
| Total: |          |      |         | 100.00 |      |                  |     |  |

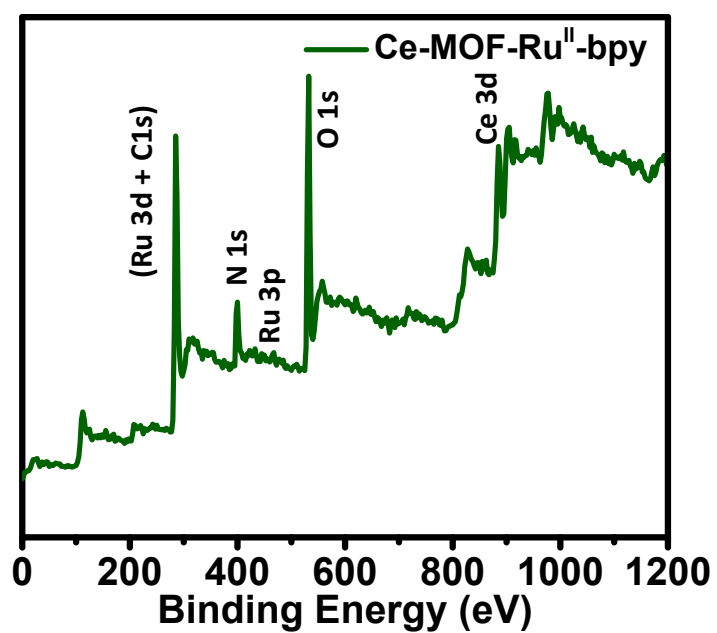

Fig. S10 XPS spectra of Ce-MOF-Ru<sup>II</sup>-bpy.

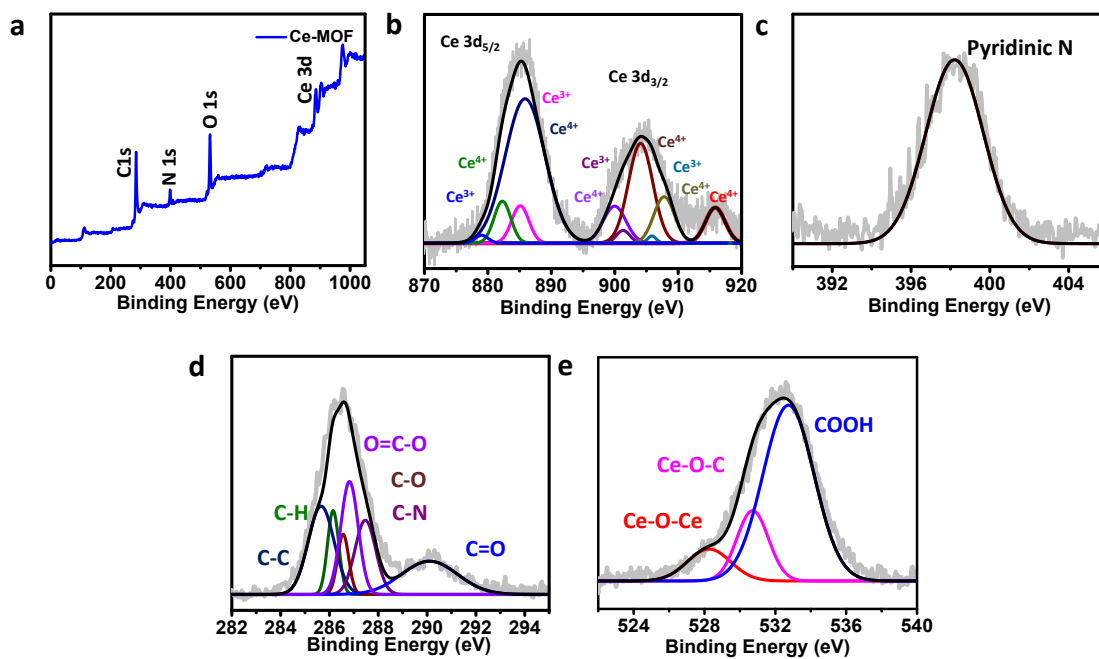

**Fig. S11** (a) XPS spectra of **Ce-MOF**. (b) Ce 3d Xps spectra. (c) N 1s XPS spectra. (d) C 1s XPS spectra. (e) O 1s XPS spectra.

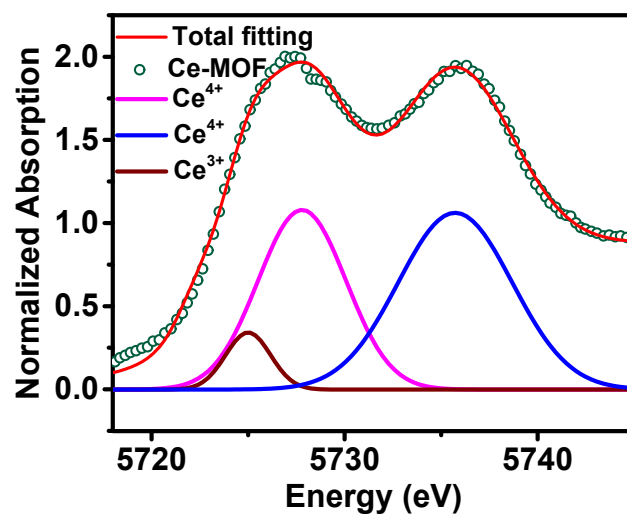

**Fig. S12** Ce L3-edge XANES spectrum and fitting peaks of **Ce-MOF**.

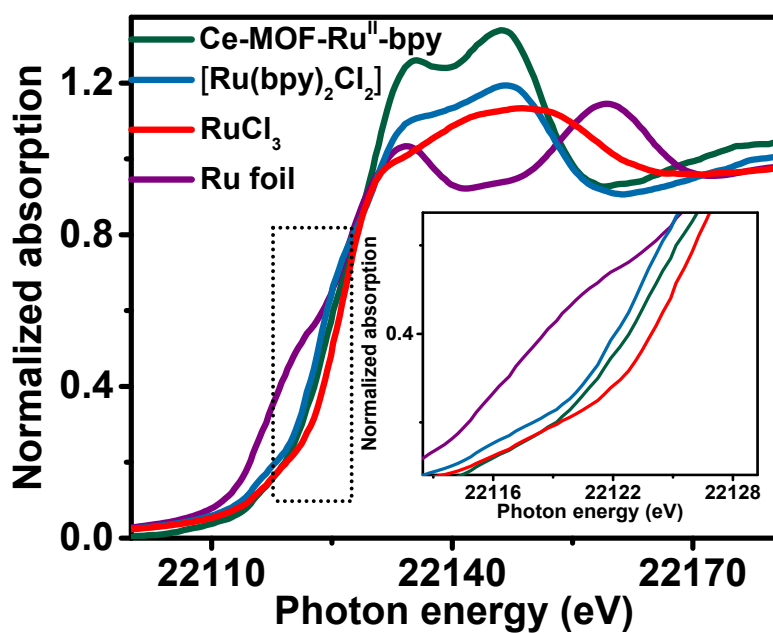

**Fig. S13** Experimental Ru K-edge XANES spectra of Ce-MOF-Ru<sup>II</sup>-bpy (green), [Ru(bpy)<sub>2</sub>Cl<sub>2</sub>], RuCl<sub>3</sub>, Ru foil.

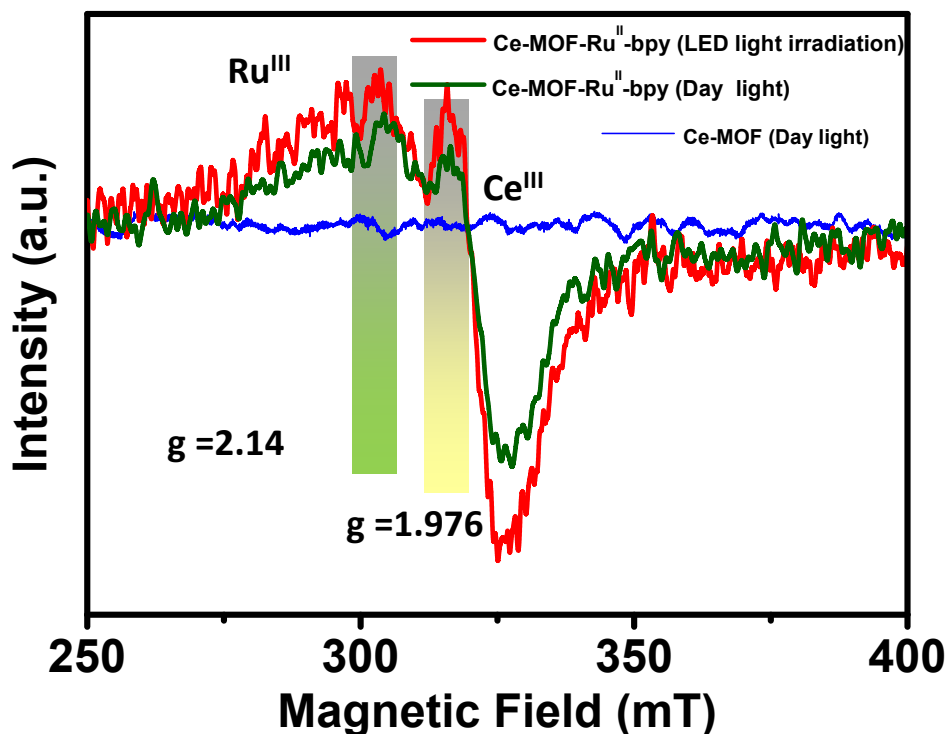

**Fig. S14** EPR signals of Ce-MOF under visible light (blue) and Ce-MOF-Ru<sup>II</sup>-bpy under daylight (green) and LED light ( $\lambda=380-780$  nm) irradiation (red) condition.



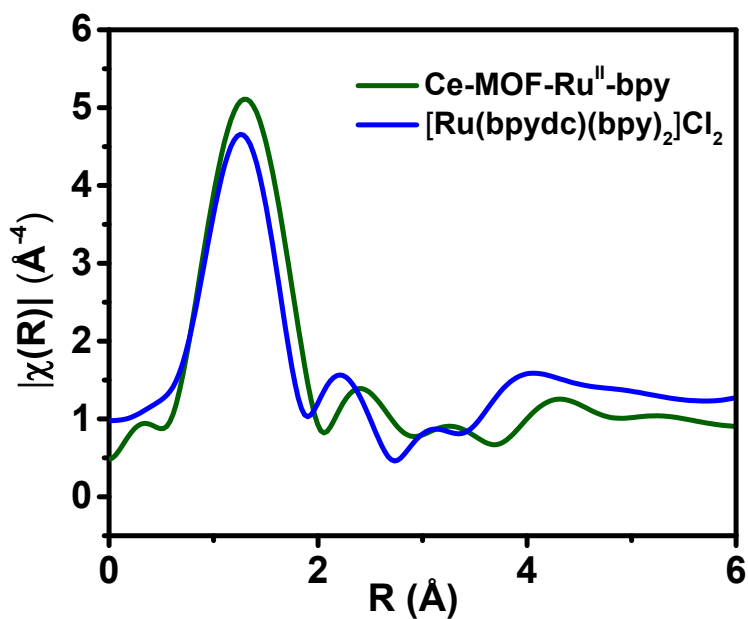

**Fig. S15** A comparison of EXAFS data for Ce-MOF-Ru<sup>II</sup>-bpy in comparison to their homogeneous components [Ru(bpydc)(bpy)<sub>2</sub>]Cl<sub>2</sub>.

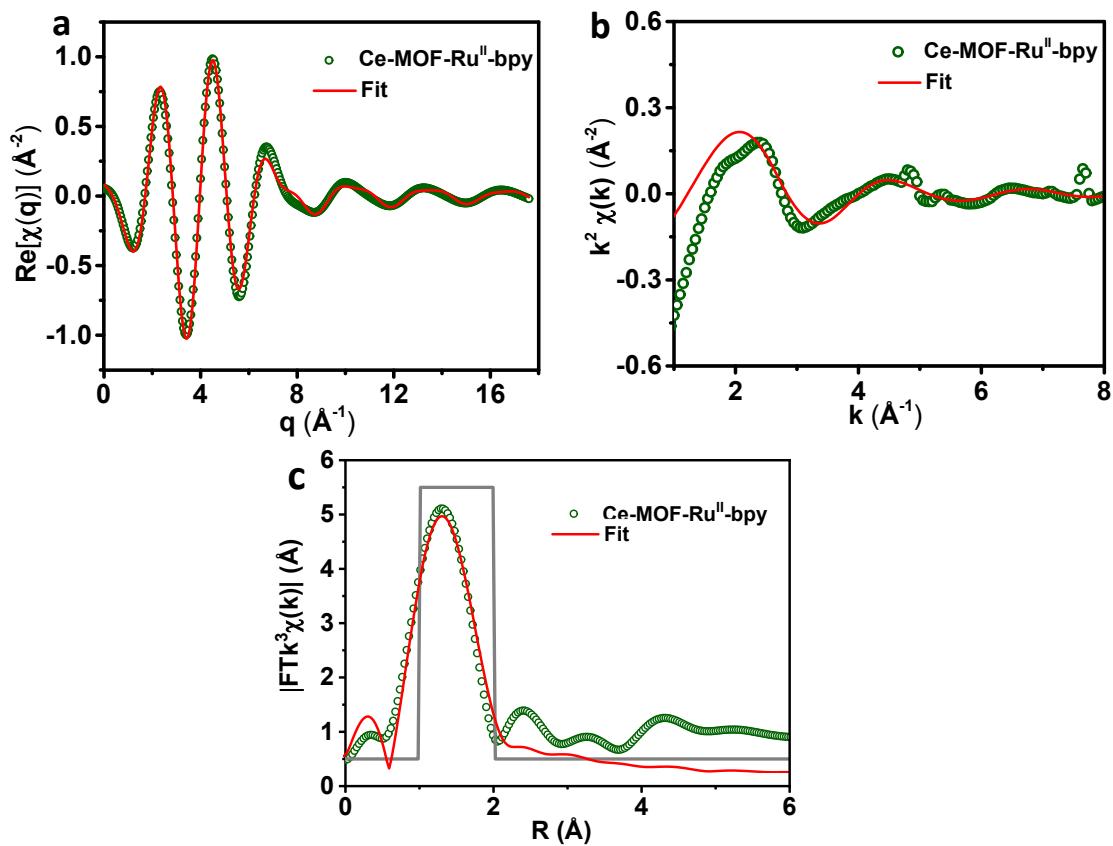

**Fig. S16** Experimental and fitted EXAFS data in  $q$  space **a**, and  $K$  space **b**, and  $R$  space ( $k^3$  weightage) **c**, of [Ru(bpydc)(bpy)<sub>2</sub>]Cl<sub>2</sub> in Ce-MOF-Ru<sup>II</sup>-bpy.

**Table S2. Fitting parameter:** CN, Coordination number, R, distance between backscatter atoms,  $\sigma^2$ , Debye-Waller factor (a measure of thermal and static disorder in absorber-scatterer distance); R factor is used to value the goodness of the fitting.

| Sample                       | Path | CN | R( $\text{\AA}$ ) | $\sigma^2$ ( $10^{-3} \text{ \AA}^2$ ) | R factor |
|------------------------------|------|----|-------------------|----------------------------------------|----------|
| Ce-MOF-Ru <sup>II</sup> -bpy | Ru-N | 6  | 2.07              | 3.28                                   | 0.014    |

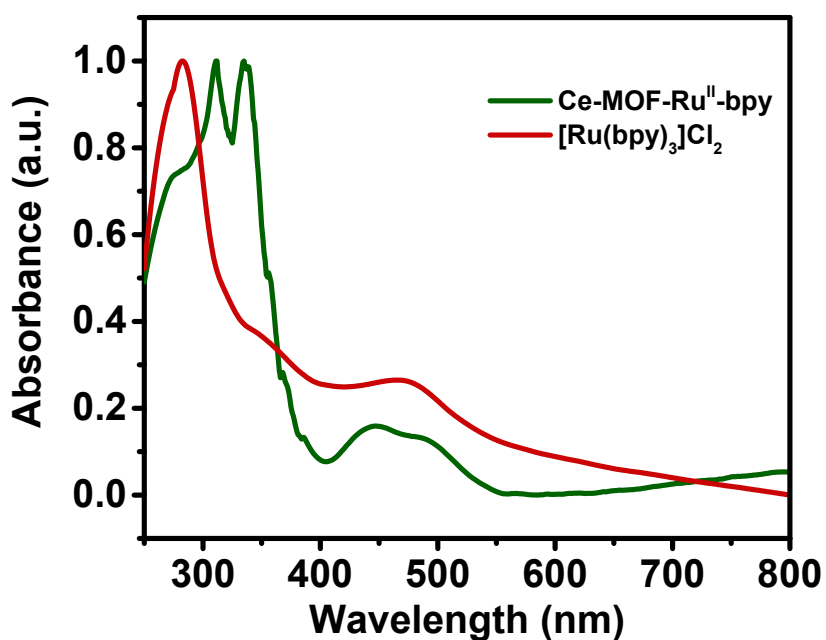

**Fig. S17** UV-vis spectra of  $[\text{Ru}(\text{bpy})_3]\text{Cl}_2$  and Ce-MOF-Ru<sup>II</sup>-bpy.

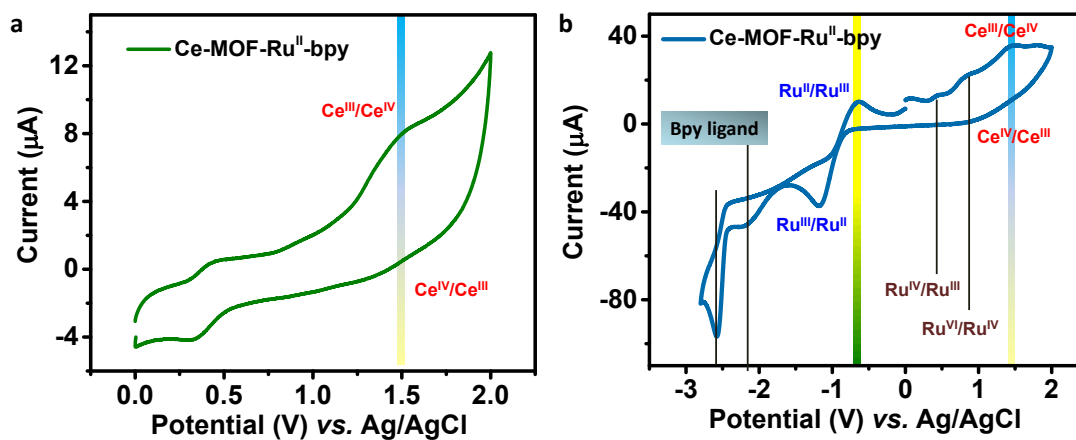

**Fig. S18** (a) Cyclic voltammetry of Ce-MOF-Ru<sup>II</sup>-bpy from 0 to 2 V vs Ag/AgCl. (b) Cyclic voltammetry of Ce-MOF-Ru<sup>II</sup>-bpy from -3 to 2 V vs Ag/AgCl.

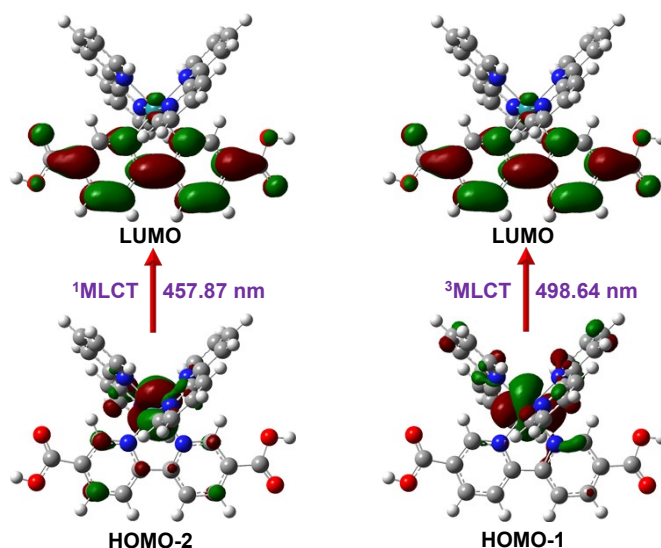

**Fig. S19** HOMO and LUMO position of  $^1\text{MLCT}$  and  $^3\text{MLCT}$  transition of  $[\text{Ru}(\text{bpydc})(\text{bpy})_2]\text{Cl}_2$ .

**Table S3** Assignment of the  $^1\text{MLCT}$  and  $^3\text{MLCT}$  band in the experimental solid-state absorption spectrum of Ce-MOF-Ru<sup>II</sup>-bpy with different transitions.

| Experimental absorption maximum | Theoretical band | Transition                | Assignment      | % Contribution |
|---------------------------------|------------------|---------------------------|-----------------|----------------|
| 445 nm                          | 457.87 nm        | HOMO-2 $\rightarrow$ LUMO | $^1\text{MLCT}$ | 91 %           |
| 492 nm                          | 498.64 nm        | HOMO-1 $\rightarrow$ LUMO | $^3\text{MLCT}$ | 81 %           |

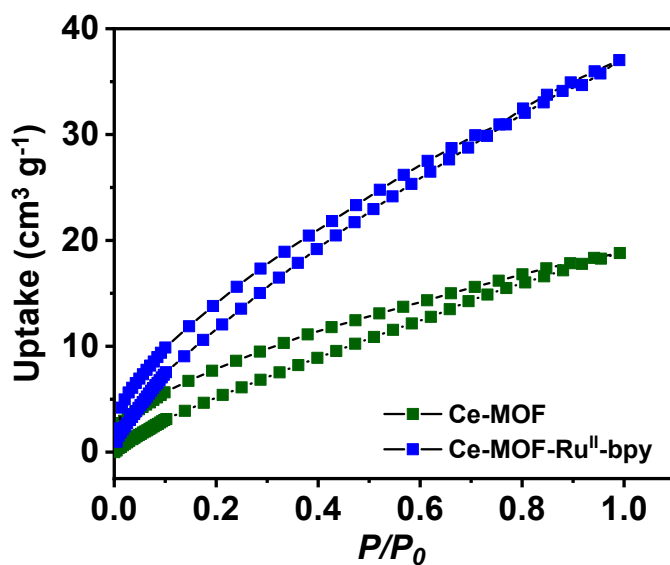

**Fig. S20**  $\text{CO}_2$  adsorption-desorption isotherms of Ce-MOF and Ce-MOF-Ru<sup>II</sup>-bpy at room temperature (298 K).

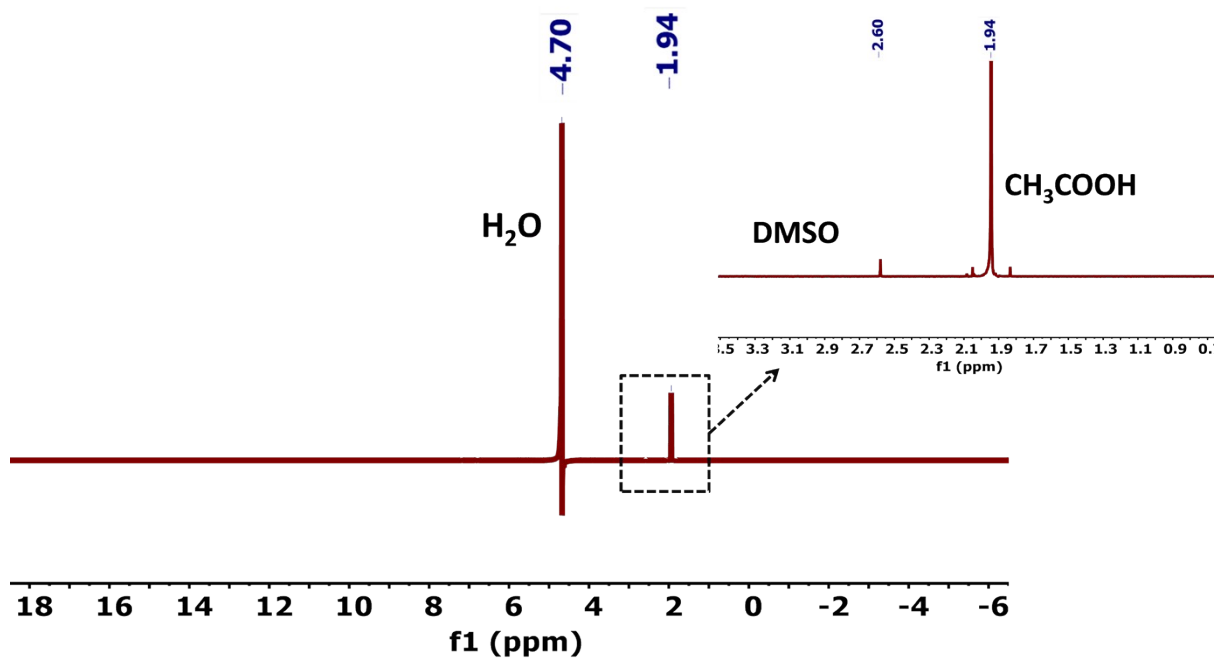

**Fig. S21** <sup>1</sup>H NMR spectrum of standard acetic acid product in CO<sub>2</sub>-saturated water. (DMSO is used as an external standard).

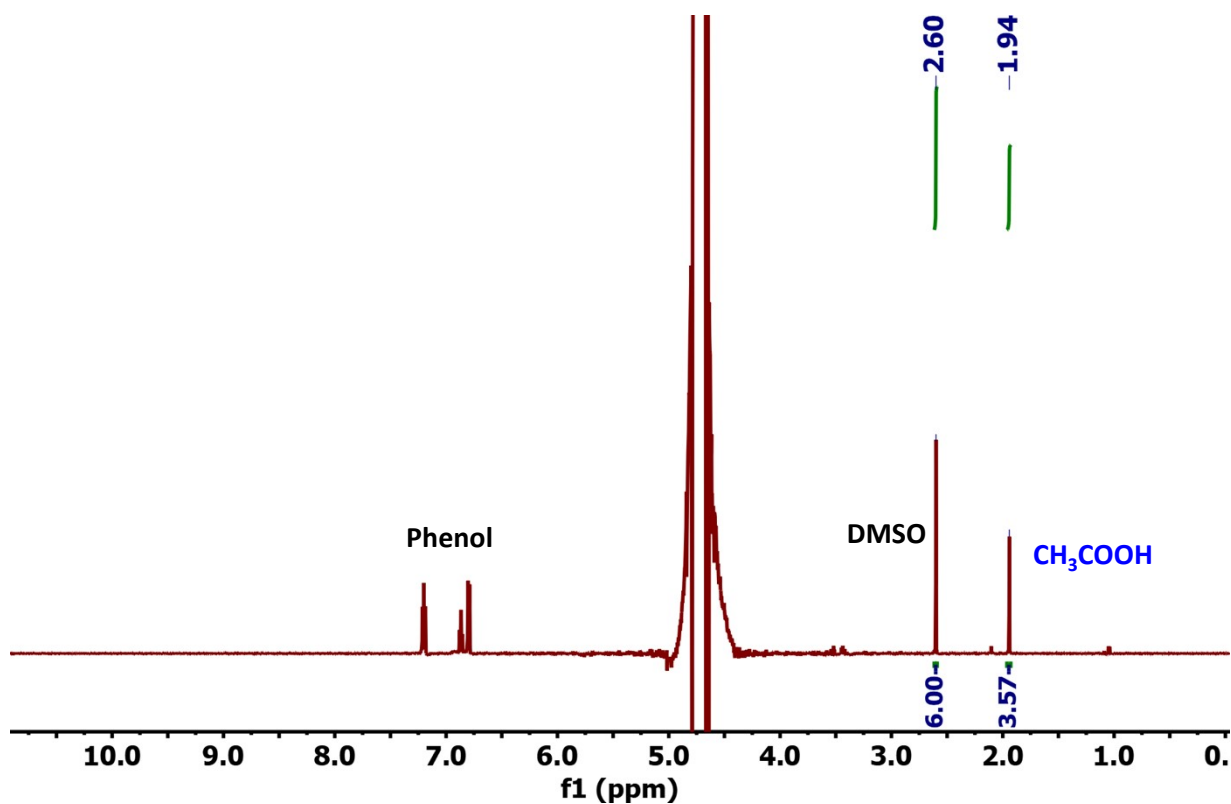

**Fig. S22** <sup>1</sup>H NMR spectrum of the obtained acetic acid product in CO<sub>2</sub>-saturated water solution after 10 h of photoirradiation. (DMSO and phenol are used as external standard).

NMR spectra of the obtained acetic acid product in water solution after 10 h of photoirradiation. (DMSO and phenol used as an external standard)

From Fig. S24, the ratio of [DMSO] and [CH<sub>3</sub>COOH] was obtained using integration value.

$$[\text{DMSO}]/[\text{CH}_3\text{COOH}] = [6/6]/[3.57/3] = 0.84$$

$$[\text{CH}_3\text{COOH}] = [\text{DMSO}]/0.84 \text{ -----(1)}$$

Now, during NMR sample preparation 600  $\mu\text{L}$  aliquot was taken along with 50  $\mu\text{L}$  D<sub>2</sub>O and 50  $\mu\text{L}$  external standard (DMSO +Phenol).

Effective strength of DMSO in the NMR tube is 0.2857 mM;

From equation 1, we found [CH<sub>3</sub>COOH] = 0.3401 mM

The amount of CH<sub>3</sub>COOH = 0.2380  $\mu\text{mol}$

In total of 10 mL solution the amount of CH<sub>3</sub>COOH = 3.4011  $\mu\text{mol}$

$$\text{The yield of CH}_3\text{COOH} = \frac{3.4011 \mu\text{mol}}{0.003 \text{ g}} = 1133 \mu\text{mol g}^{-1}$$

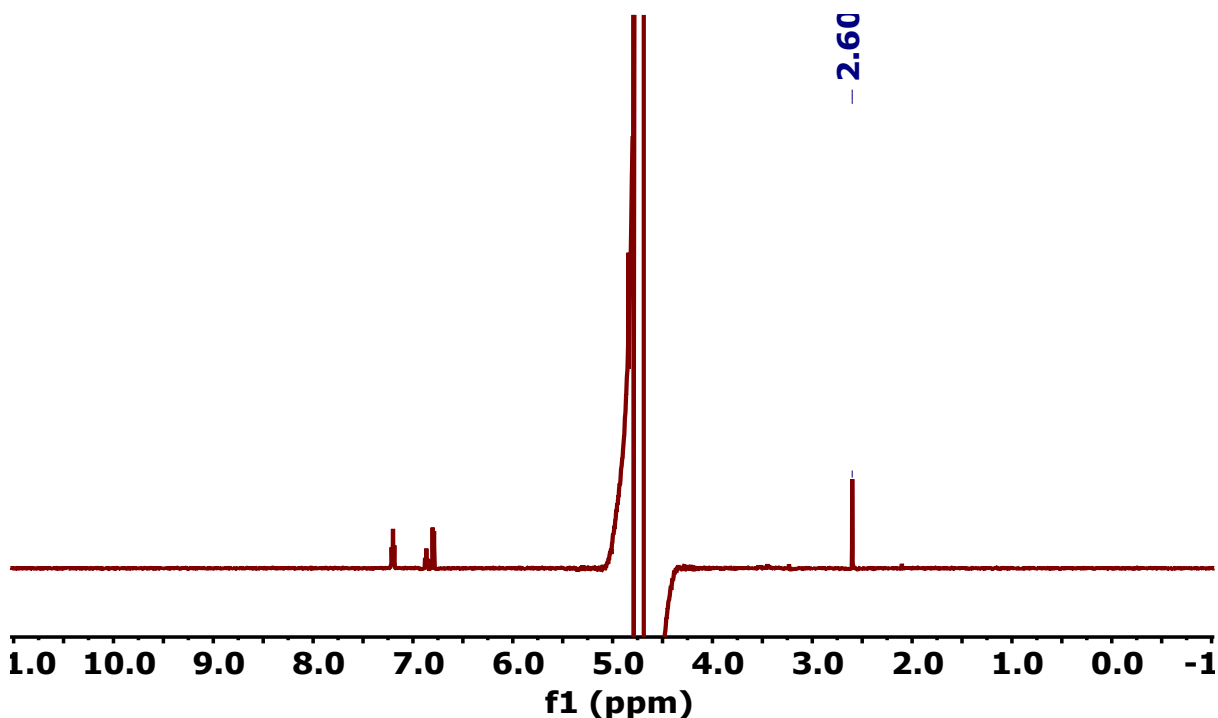

**Fig. S23** <sup>1</sup>H NMR spectrum of liquid product in CO<sub>2</sub>-saturated water solution without photoirradiation. (DMSO and phenol are used as external standard).

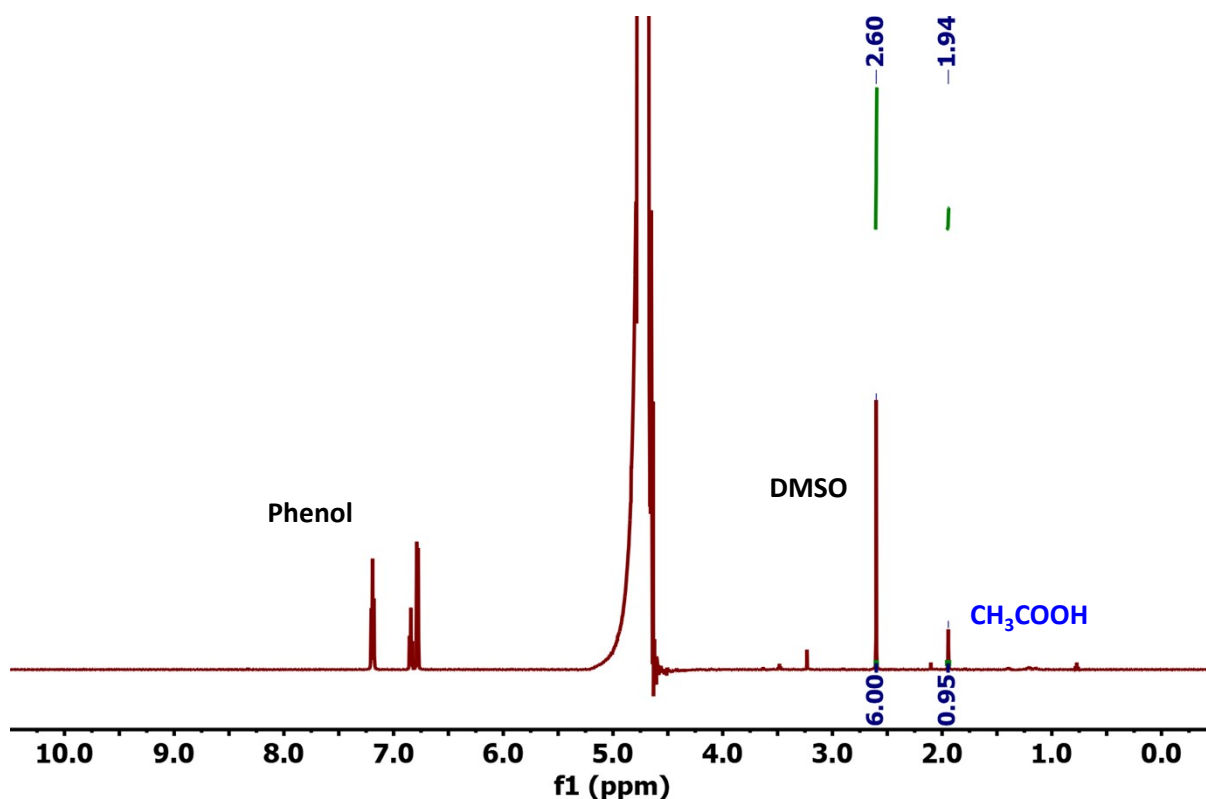

**Fig. S24**  $^1\text{H}$  NMR spectra of the obtained acetic acid product in  $\text{CO}_2$ -saturated water solution after 6 h of photoirradiation by applying a 450 nm bandpass filter. (DMSO and phenol used as external standard).

#### Apparent Quantum Efficiency Calculation:

Apparent quantum efficiency (AQE) is defined as the following equation: [1]

$$AQE = \frac{\text{Number of reacted electrons}}{\text{Number of incident photons}} \times 100\% \quad \text{Eq. 1}$$

Eight electrons are required to convert  $\text{CO}_2$  to  $\text{CH}_3\text{COOH}$ , so AQE for  $\text{CH}_3\text{COOH}$  can be calculated using the following equations: 2.

$$AQE - \text{CH}_3\text{COOH} = \frac{8 \times \text{the number of evolved CH}_3\text{COOH molecules}}{\text{the number of incident photons}} \times 100\% \quad \text{Eq. S2}$$

In the following, we described the AQE determination at 450 nm for **Ce-MOF-Ru<sup>II</sup>-bpy**.

- 1) The amounts of  $\text{CH}_3\text{COOH}$  produced were measured by applying a 450 nm band-pass filter for 6 h. The amounts of  $\text{CH}_3\text{COOH}$  molecules evolved in 6 h were 0.301  $\mu\text{mol}$ .
- 2) The average intensity of irradiation after the 450 nm band pass filter was determined to be 3.2  $\text{mW cm}^{-2}$  by a light meter (LI-COR Biosciences, LI-250A) at room temperature.
- 3) The irradiation area was controlled to be 1  $\text{cm}^2$ .

4) The number of incident photons (N) is  $1.56 \times 10^{20}$  as calculated by equation (3).

$$N = \frac{E\lambda}{hc} = \frac{3.2 \times 10^{-3} \times 1 \times 3600 \times 6 \times 450 \times 10^{-9}}{6.626 \times 10^{-34} \times 3 \times 10^8} = 1.56 \times 10^{20} \quad \text{Eq. S3}$$

5) The AQE for CH<sub>3</sub>COOH was calculated based on Eq. S2.

$$\begin{aligned} \text{AQE} - \text{CH}_3\text{COOH} &= \frac{8 \times \text{the number of evolved CH}_3\text{COOH molecules}}{\text{the number of incident photons}} \times 100\% \\ &= \frac{8 \times N_A \times [\text{CH}_3\text{COOH}]}{N} \times 100\% \\ &= \frac{8 \times 6.023 \times 10^{23} \times 3.01 \times 10^{-7}}{1.56 \times 10^{20}} \times 100\% = 0.93\% \text{ in H}_2\text{O} \end{aligned}$$

Therefore, the AQE of **Ce-MOF-Ru<sup>II</sup>-bpy** at 450 nm was 0.93% in H<sub>2</sub>O.

N is the number of incident photons

E is the total incident energy on the photocatalyst (J)

λ is the light wavelength (m)

h is Planck's constant (J s)

c is the speed of light (m s<sup>-1</sup>)

N<sub>A</sub> is Avogadro's number (mol<sup>-1</sup>)

[CH<sub>3</sub>COOH] is the amounts of CH<sub>3</sub>COOH, after 6 hours.

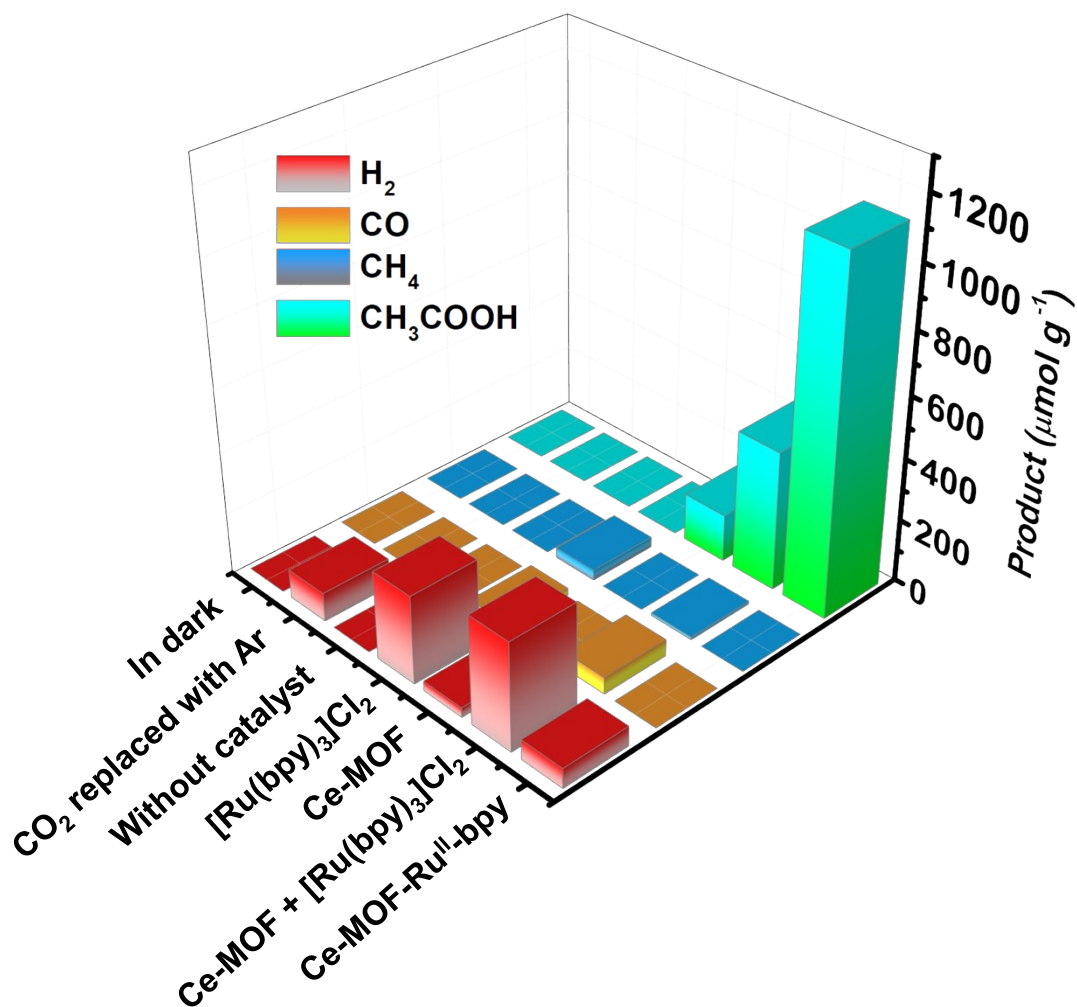

Fig. S25 Photocatalytic CO<sub>2</sub> reduction in water for 10 h.

Table S4. Comparison studies of photocatalytic CO<sub>2</sub> reduction in water.

| Catalyst                     | Reaction condition                                               | Products                                  |                               |                                            |                                                 |
|------------------------------|------------------------------------------------------------------|-------------------------------------------|-------------------------------|--------------------------------------------|-------------------------------------------------|
|                              |                                                                  | H <sub>2</sub><br>(μmol g <sup>-1</sup> ) | CO<br>(μmol g <sup>-1</sup> ) | CH <sub>4</sub><br>(μmol g <sup>-1</sup> ) | CH <sub>3</sub> COOH<br>(μmol g <sup>-1</sup> ) |
| Ce-MOF-Ru <sup>II</sup> -bpy | 300 W Xe lamp, >400 nm<br>CO <sub>2</sub> saturated water medium | 65                                        | N.D.                          | N.D.                                       | 1133                                            |



|                                                         |                                                                       |      |      |      |       |
|---------------------------------------------------------|-----------------------------------------------------------------------|------|------|------|-------|
| <b>Ce-MOF +<br/>[Ru(bpy)<sub>3</sub>]Cl<sub>2</sub></b> | 300 W Xe<br>lamp,>400 nm<br>CO <sub>2</sub> saturated<br>water medium | 350  | 55   | 11   | 450   |
| <b>Ce-MOF</b>                                           | 300 W Xe<br>lamp,>400 nm<br>CO <sub>2</sub> saturated<br>water medium | 32   | N.D. | N.D. | 152.5 |
| <b>[Ru(bpy)<sub>3</sub>]Cl<sub>2</sub></b>              | 300 W Xe<br>lamp,>400 nm<br>CO <sub>2</sub> saturated<br>water medium | 285  | 23   | 34   | N.D.  |
| <b>Without catalyst</b>                                 | 300 W Xe<br>lamp,>400 nm<br>CO <sub>2</sub> saturated<br>water medium | N.D. | N.D. | N.D. | N.D.  |
| <b>Ce-MOF-Ru<sup>II</sup>-bpy</b>                       | <b>CO<sub>2</sub> replaced<br/>with Ar</b>                            | 93   | N.D. | N.D. | N.D.  |
| <b>Ce-MOF-Ru<sup>II</sup>-bpy</b>                       | In dark                                                               | N.D. | N.D. | N.D. | N.D.  |

N.D.= Not detected

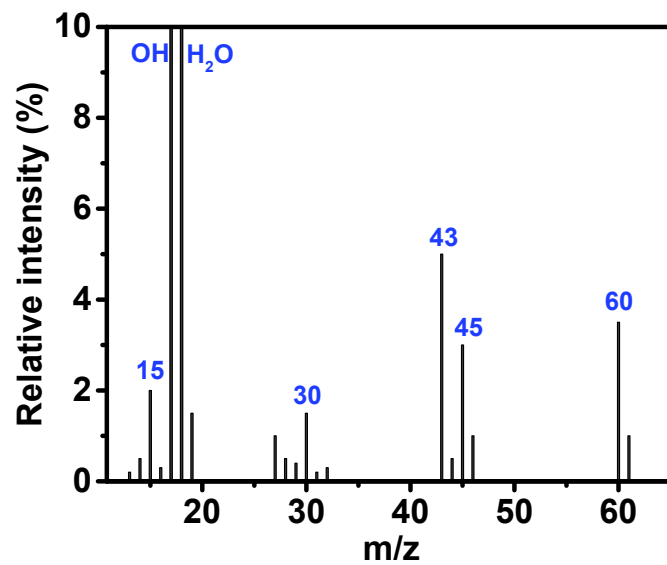

**Fig. S26** Mass spectra extracted from GC-MS analysis of acetic acid product from <sup>12</sup>CO<sub>2</sub> reduction over Ce-MOF-Ru<sup>II</sup>-bpy in water.

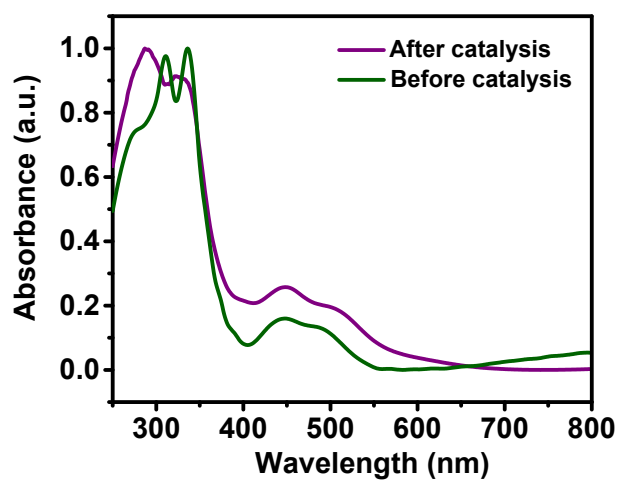

**Fig. S27** UV-vis spectra of Ce-MOF-Ru<sup>II</sup>-bpy after and before catalysis.

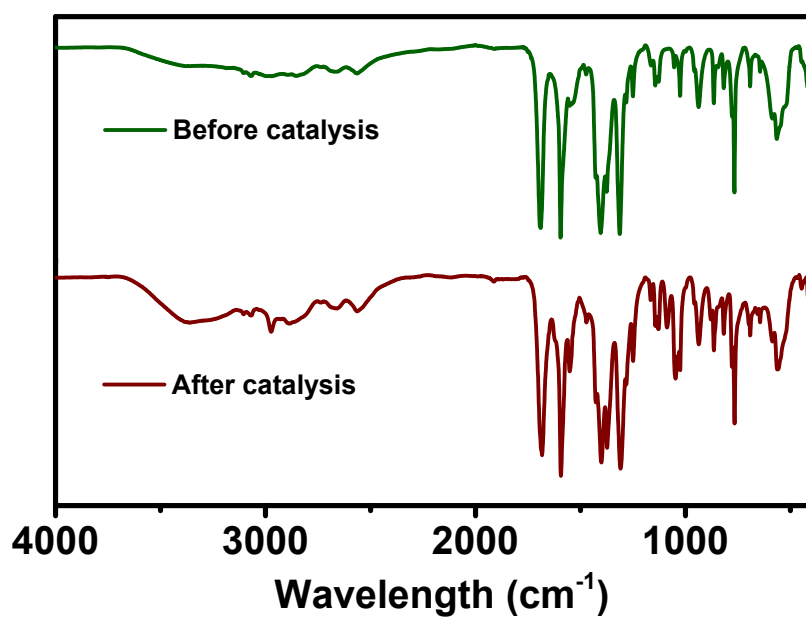

Fig. S28 FTIR spectra before and after catalysis.

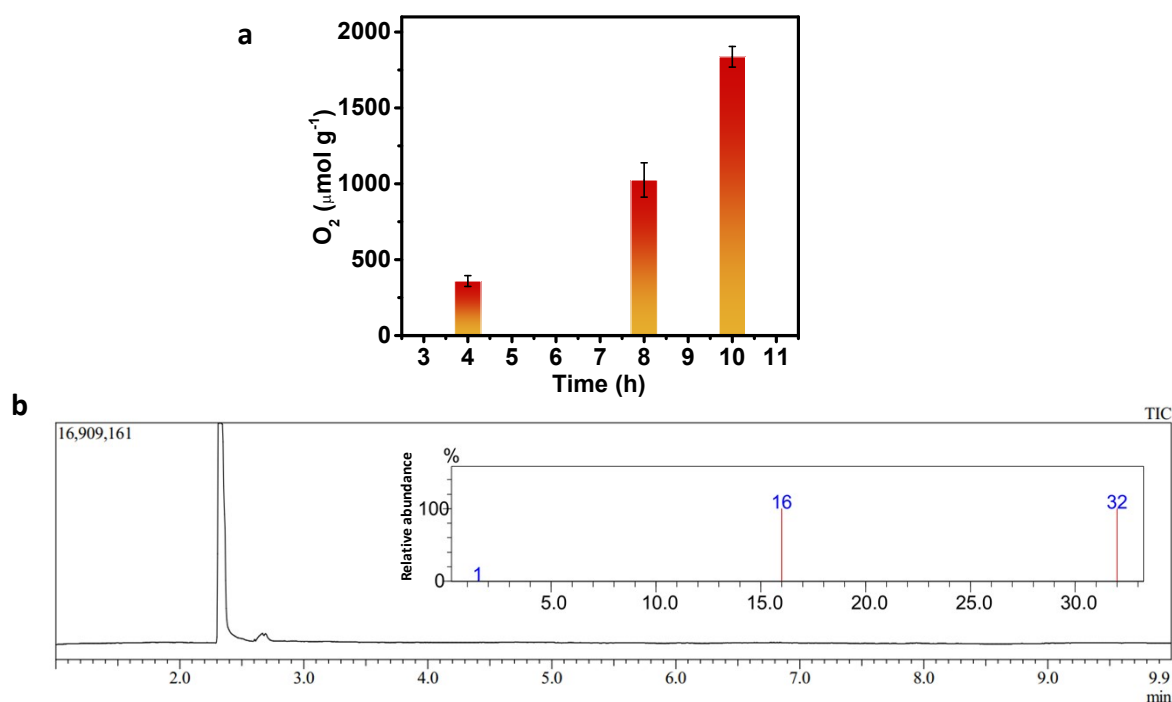

Fig. S29 (a) O<sub>2</sub> production (oxidation product from water oxidation) over Ce-MOF-Ru<sup>II</sup>-bpy as a function of time of irradiation in water. (b) Gas chromatogram of O<sub>2</sub> production over Ce-MOF-Ru<sup>II</sup>-bpy in water. Inset is showing the corresponding mass spectra of O<sub>2</sub> chromatogram.

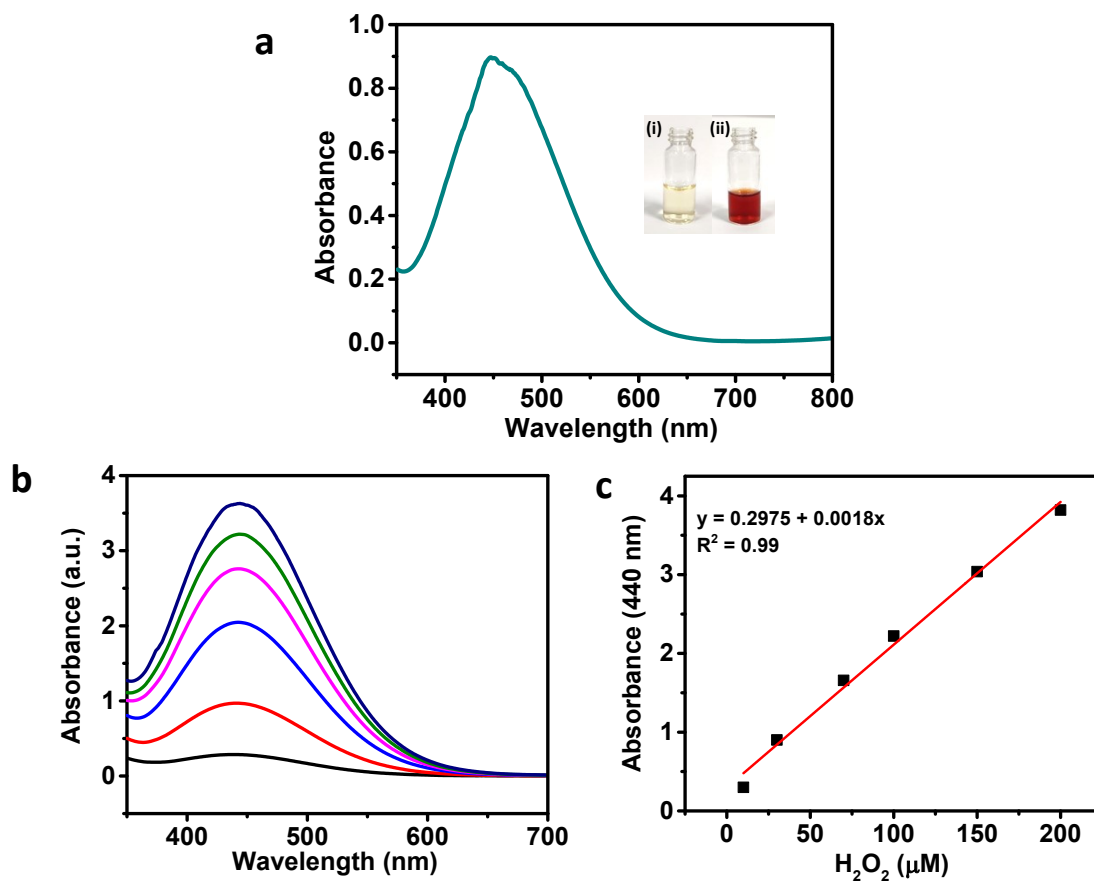

**Fig. S30** (a) UV-vis spectrum of the reaction solution with addition of FeCl<sub>2</sub> and KSCN. The inset is the supernatant of the catalytic system of the photocatalytic CO<sub>2</sub> reduction in H<sub>2</sub>O using Ce-MOF-Ru<sup>II</sup>-bpy before (i) and after (ii) FeCl<sub>2</sub> /KSCN addition. (b) UV-vis spectra of a solution containing FeCl<sub>2</sub> and KSCN with the different concentration of H<sub>2</sub>O<sub>2</sub>. (c) Corresponding fitting of the UV-vis spectra.

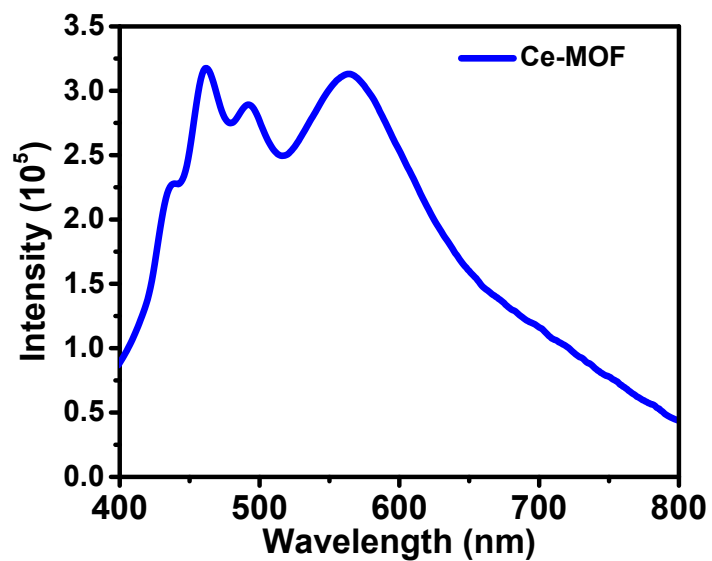

Fig. S31 Photoluminescence spectra of Ce-MOF. ( $\lambda_{\text{ex}} = 340$  nm).

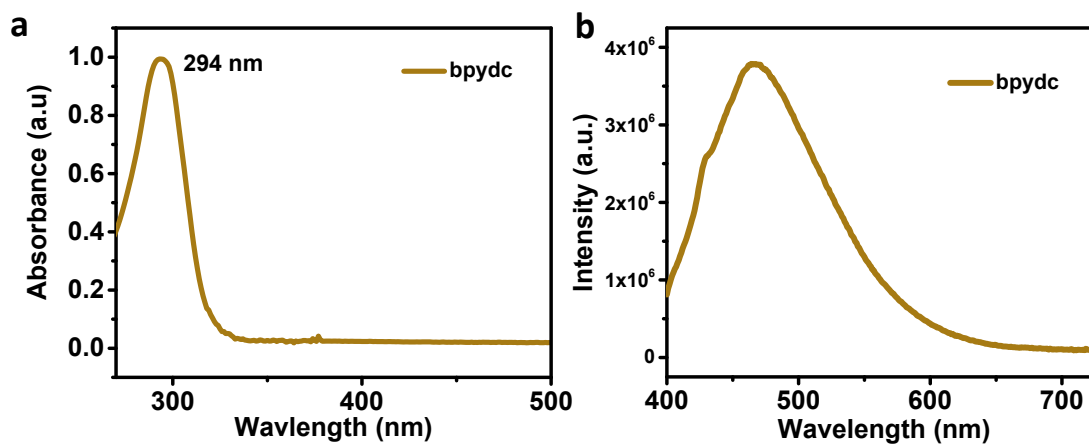

Fig. S32 (a) UV-vis spectrum of bpydc. (b) Photoluminescence spectrum of bpydc. ( $\lambda_{\text{ex}} = 300$  nm).

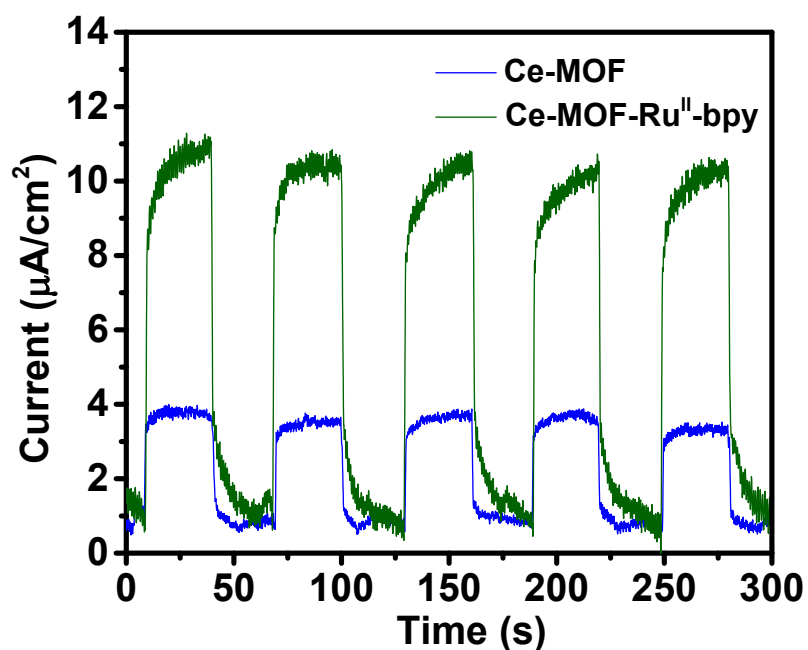

**Fig. S33** Transient photocurrent responses of **Ce-MOF** and **Ce-MOF-Ru<sup>II</sup>-bpy** in 0.2 M Na<sub>2</sub>SO<sub>4</sub> aqueous solution under visible-light irradiation.

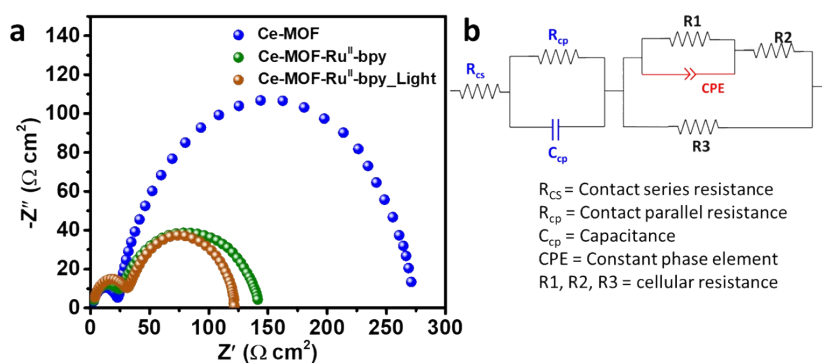

**Fig. S34** (a) EIS Nyquist plot of **Ce-MOF** and **Ce-MOF-Ru<sup>II</sup>-bpy**. (b) The equivalent circuit model used for fitting the impedance spectra of **Ce-MOF**, **Ce-MOF-Ru<sup>II</sup>-bpy** and **Ce-MOF-Ru<sup>II</sup>-bpy\_Light**.

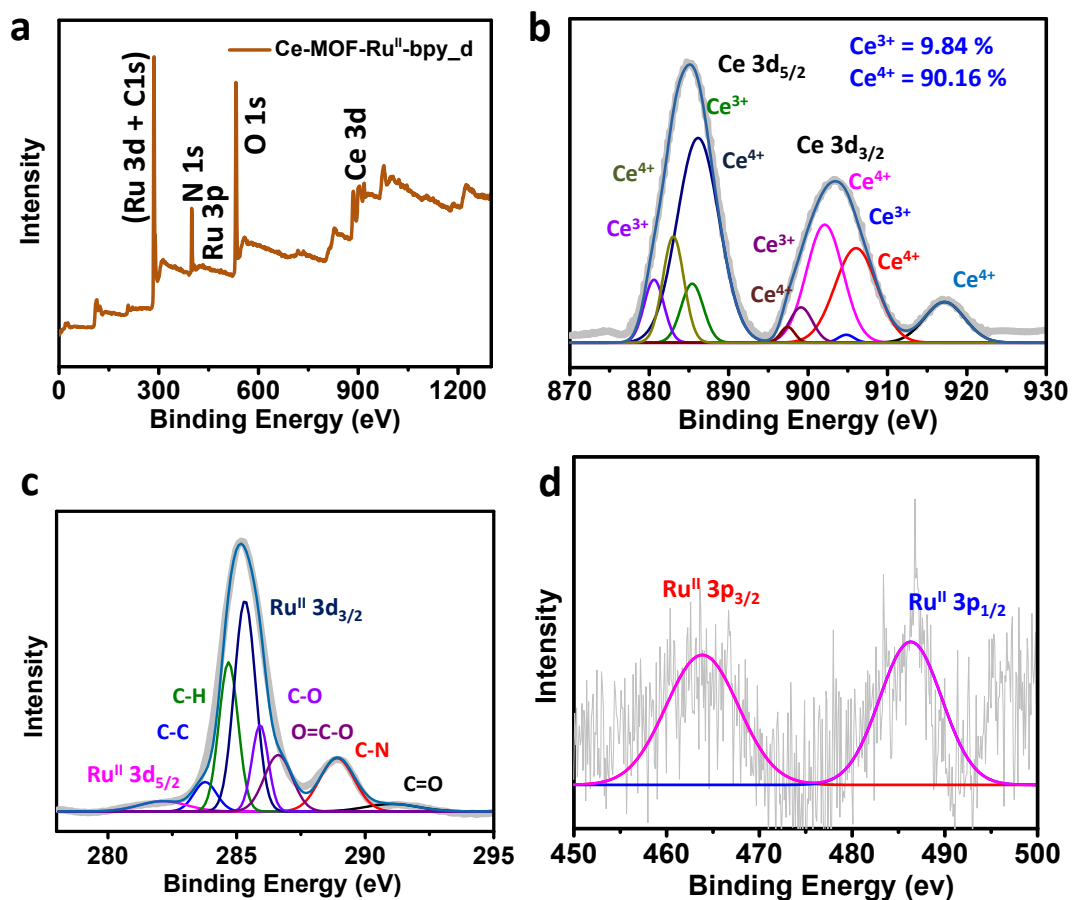

**Fig. S35** (a) XPS spectra of **Ce-MOF-Ru<sup>II</sup>-bpy\_d**. (b) XPS spectrum of Ce 3d in **Ce-MOF-Ru<sup>II</sup>-bpy\_d**. (c) XPS spectra of Ru 3d and C 1s in **Ce-MOF-Ru<sup>II</sup>-bpy\_d**. (d) XPS spectra of Ru 3p in **Ce-MOF-Ru<sup>II</sup>-bpy\_d**.

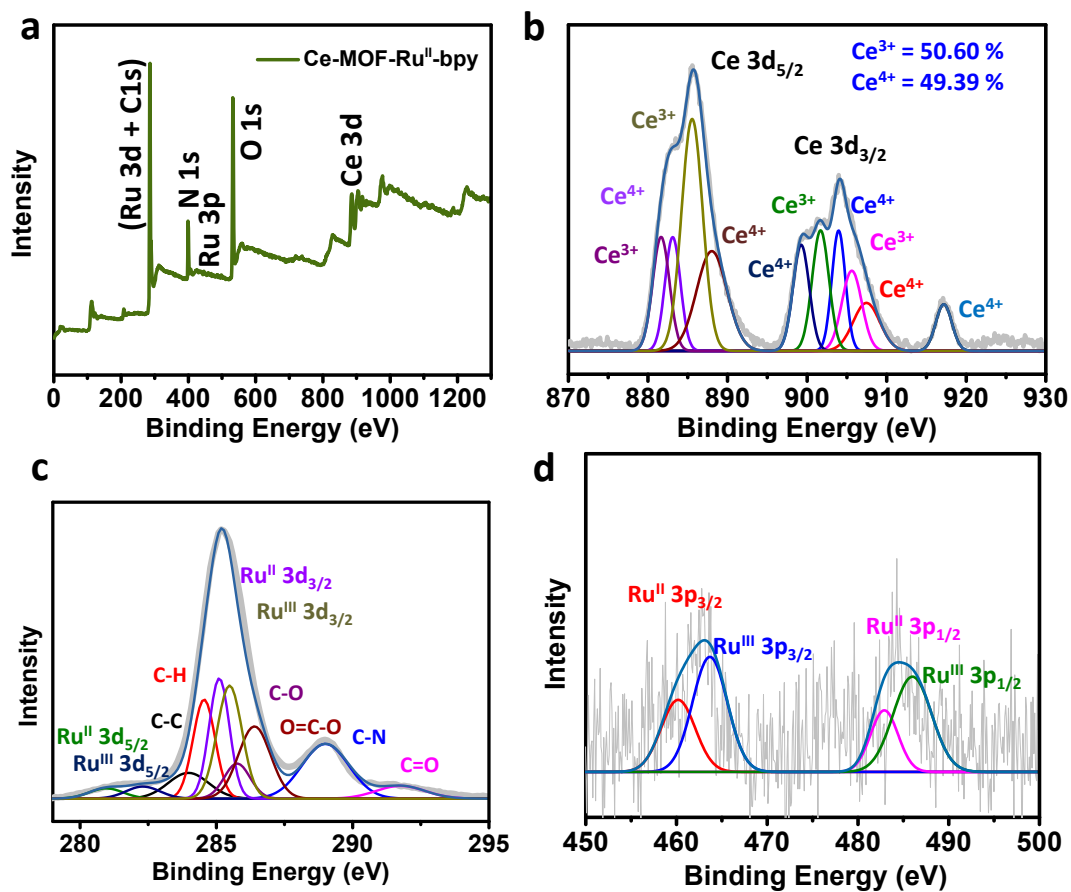

**Fig. S36** (a) XPS spectra of Ce-MOF-Ru<sup>II</sup>-bpy after LED ( $\lambda=380-780$  nm) light irradiation onto Ce-MOF-Ru<sup>II</sup>-bpy\_d. (b) XPS spectrum of Ce 3d in Ce-MOF-Ru<sup>II</sup>-bpy. (c) XPS spectra of Ru 3d and C 1s in Ce-MOF-Ru<sup>II</sup>-bpy. (d) XPS spectra of Ru 3p in Ce-MOF-Ru<sup>II</sup>-bpy.



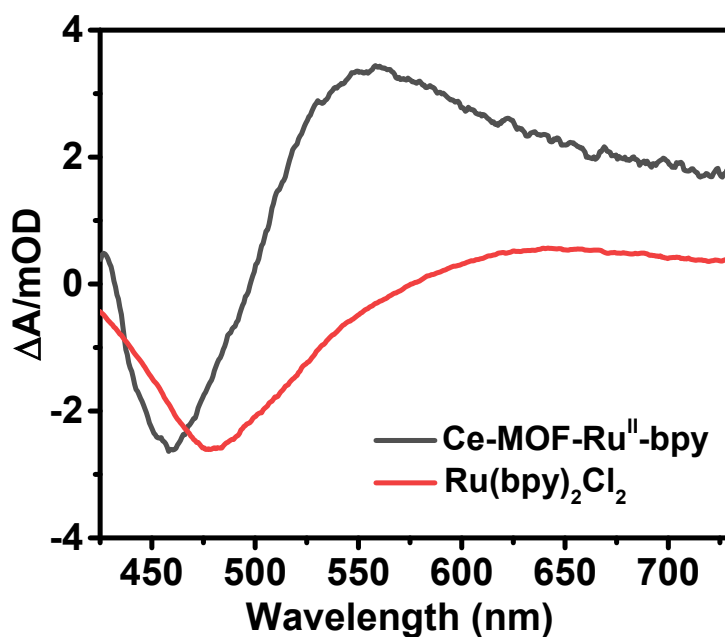

**Fig. S37** Transient absorption spectra of Ce-MOF-Ru<sup>II</sup>-bpy and [Ru(bpy)<sub>2</sub>Cl<sub>2</sub>] recorded at 1 ps delay.

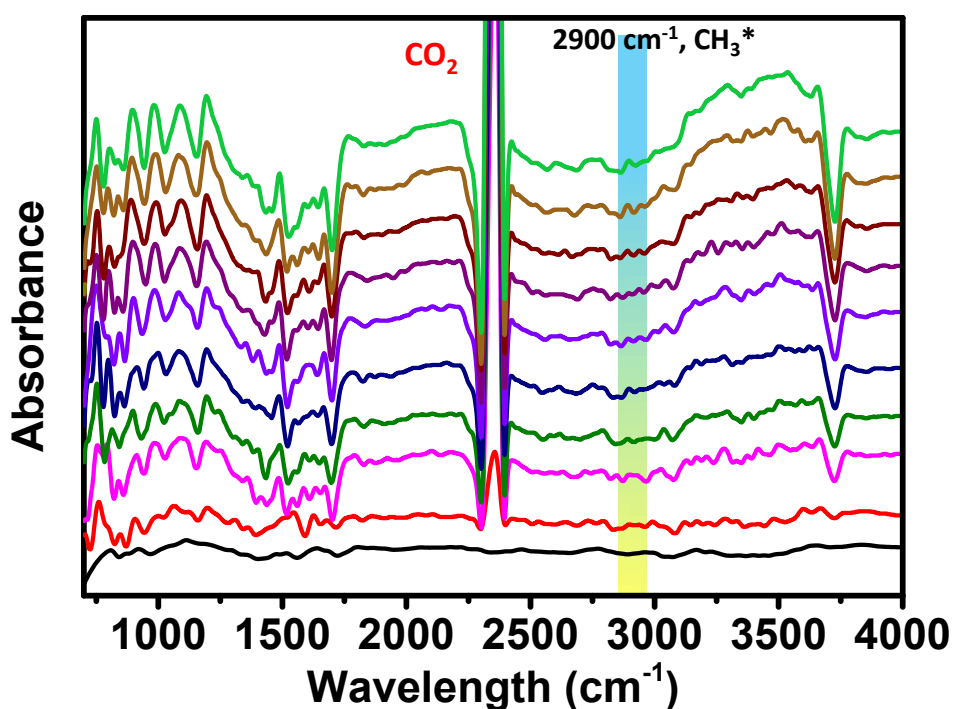

**Fig. S38** Time-dependent in situ diffuse reflectance FT-IR spectra for CO<sub>2</sub> reduction in a mixture of CO<sub>2</sub> and H<sub>2</sub>O vapour on Ce-MOF-Ru<sup>II</sup>-bpy in the dark (background) and under visible light irradiation (LED lamp, λ = 420 nm). Irradiation time 20, 40, 60, 80, 100, 120, 140, 160 and 180 min, respectively.

In short, the possible reaction pathway for the acetic acid production from CO<sub>2</sub> might be followed these steps:

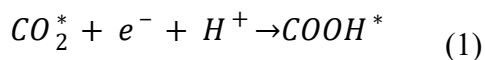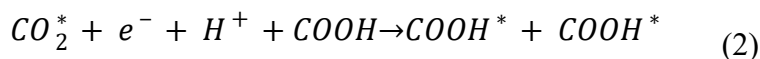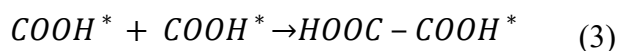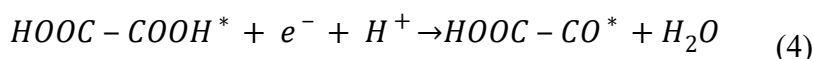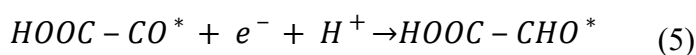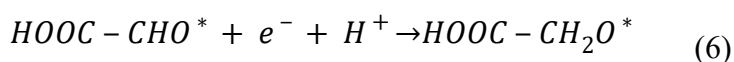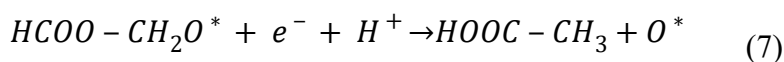

### Computational Details:

#### Cartesian coordinates of the computed structures

Coordinates are given in standard XYZ format

**Table S5:** DFT-optimized geometry of [Ru<sup>II</sup>(bpydc)(bpy)<sub>2</sub>]<sup>2+</sup> (singlet), computed at the B3LYP-D3/ 6-31G\* (HCNO)/ LANL2DZ (Ru) level in water solvent using PCM.

| Atom | x           | y           | z           |
|------|-------------|-------------|-------------|
| C    | 3.38832500  | -2.38031600 | -0.65422000 |
| C    | 2.79498600  | -3.63940800 | -0.53018600 |
| C    | 2.58700200  | -1.24669200 | -0.51993200 |
| C    | 1.43136200  | -3.72192600 | -0.27973300 |
| H    | 3.40295000  | -4.53140200 | -0.62898200 |
| H    | 3.00389100  | -0.25285400 | -0.60912200 |
| C    | 0.68079300  | -2.54873600 | -0.15698900 |
| H    | 0.96125200  | -4.69140100 | -0.17765800 |
| C    | -0.76940600 | -2.52593500 | 0.10596000  |
| C    | -1.55923400 | -3.67358000 | 0.21231600  |
| C    | -2.63052600 | -1.16820300 | 0.48077500  |
| C    | -2.92187200 | -3.55237200 | 0.46234000  |
| H    | -1.12130200 | -4.65663300 | 0.09821800  |
| C    | -3.47130100 | -2.27452300 | 0.59976200  |
| H    | -3.02806100 | -0.16684600 | 0.58301700  |
| H    | -3.54689700 | -4.43308200 | 0.54697000  |

|    |             |             |             |
|----|-------------|-------------|-------------|
| N  | 1.26987400  | -1.32363400 | -0.27812200 |
| N  | -1.31742900 | -1.28241300 | 0.24315000  |
| Ru | 0.00531000  | 0.32375300  | 0.00215700  |
| C  | 1.68466500  | 1.29517100  | 2.22538100  |
| C  | 0.19753800  | -0.33411800 | 3.00144000  |
| C  | 2.22699200  | 1.43358400  | 3.50584900  |
| C  | 0.69578700  | -0.24004300 | 4.29611000  |
| H  | -0.60712700 | -1.01569200 | 2.75474300  |
| C  | 1.72954200  | 0.66033300  | 4.55143600  |
| H  | 3.02957300  | 2.13666600  | 3.68900200  |
| H  | 0.27697700  | -0.86191900 | 5.07890500  |
| H  | 2.14448700  | 0.76157000  | 5.54855100  |
| C  | -1.63363700 | 1.41564900  | -2.19463000 |
| C  | -0.20887000 | -0.24873200 | -3.01223500 |
| C  | -2.16774700 | 1.60861200  | -3.47153500 |
| C  | -0.70089400 | -0.10179600 | -4.30433700 |
| H  | 0.56798900  | -0.96741400 | -2.78246300 |
| C  | -1.69862200 | 0.84437500  | -4.53665000 |
| H  | -2.94203600 | 2.34691600  | -3.63696600 |
| H  | -0.30515700 | -0.71881500 | -5.10283400 |
| H  | -2.10760300 | 0.98772600  | -5.53106200 |
| C  | -2.05746800 | 2.17685700  | -1.00288500 |
| C  | -1.75072600 | 2.48911200  | 1.29443900  |
| C  | -3.03607200 | 3.17420200  | -1.02446700 |
| C  | -2.71506300 | 3.48990600  | 1.33492100  |
| H  | -1.21851300 | 2.18137300  | 2.18588100  |
| C  | -3.36958200 | 3.83718400  | 0.15362600  |
| H  | -3.53526300 | 3.43374600  | -1.94943100 |
| H  | -2.94121300 | 3.97924500  | 2.27533500  |
| H  | -4.12852400 | 4.61223000  | 0.14593200  |
| C  | 2.13690000  | 2.07060800  | 1.05345500  |
| C  | 1.84181100  | 2.45392600  | -1.23467000 |
| C  | 3.15376900  | 3.02808800  | 1.09947300  |
| C  | 2.84517700  | 3.41627400  | -1.25081200 |
| H  | 1.29715800  | 2.19028500  | -2.13269700 |
| C  | 3.51299100  | 3.70723500  | -0.06174100 |
| H  | 3.66261200  | 3.24435400  | 2.03029500  |
| H  | 3.09034500  | 3.92025100  | -2.17866300 |
| H  | 4.30187500  | 4.45134400  | -0.03511100 |
| N  | -0.65811500 | 0.48872800  | -1.98047600 |
| N  | -1.42786900 | 1.84346500  | 0.15890200  |
| N  | 0.67401300  | 0.41226600  | 1.98848600  |
| N  | 1.49439600  | 1.79231400  | -0.11571300 |
| C  | -4.91654200 | -2.01994600 | 0.86641800  |
| O  | -5.39686500 | -0.90805200 | 0.97763100  |
| O  | -5.62489200 | -3.15695300 | 0.96970300  |
| H  | -6.55551100 | -2.91526300 | 1.14243500  |
| C  | 4.85262800  | -2.28402800 | -0.92150000 |
| O  | 5.57844300  | -3.25106400 | -1.04273000 |
| O  | 5.27662800  | -1.01056300 | -1.01208400 |
| H  | 6.23760400  | -1.02612500 | -1.18601400 |

---

Sum of electronic and thermal Free Energies = -1956.697102 (Hartree/Particle).

From TDDFT calculation in water,  $\lambda_{\text{abs}} = 490.25$  nm.

From TDDFT calculation in absence of any solvent,  $\lambda_{\text{abs}} = 457.87 \text{ nm}$  ( $^1\text{MLCT}$ ),  $498.64 \text{ nm}$  ( $^3\text{MLCT}$ ).

**Table S6:** DFT-optimized geometry of  $[\text{Ru}^{\text{II}}(\text{bpydc})(\text{bpy})_2]^+$  (doublet), computed at the UB3LYP-D3/ 6-31G\* (HCNO)/ LANL2DZ (Ru) level in water solvent using PCM. The spin density plot is also shown below. (Isovalue = 0.0004)

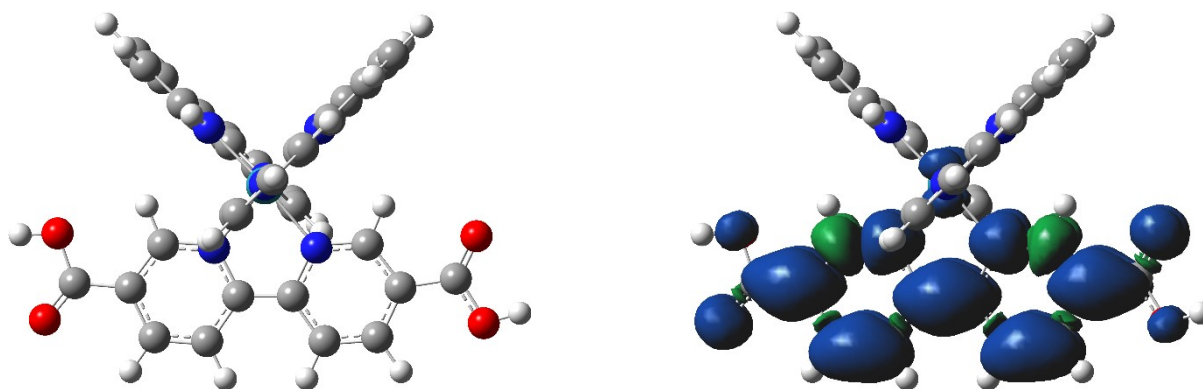

Spin Density Distribution

| Atom | x           | y           | z           |
|------|-------------|-------------|-------------|
| C    | 3.40477700  | -2.35590100 | -0.66437700 |
| C    | 2.78042600  | -3.62966700 | -0.56542600 |
| C    | 2.59257600  | -1.22634100 | -0.50406400 |
| C    | 1.43359300  | -3.71129400 | -0.31891500 |
| H    | 3.38365700  | -4.52299600 | -0.68620000 |
| H    | 3.01552400  | -0.23190500 | -0.57367000 |
| C    | 0.65407900  | -2.52917000 | -0.16171800 |
| H    | 0.95818800  | -4.68199400 | -0.24158600 |
| C    | -0.74723200 | -2.50648200 | 0.09458500  |
| C    | -1.56934100 | -3.66166400 | 0.22679800  |
| C    | -2.63674700 | -1.14515200 | 0.46170200  |
| C    | -2.91448500 | -3.54065000 | 0.47436500  |
| H    | -1.12860900 | -4.64682000 | 0.12977600  |
| C    | -3.49129400 | -2.24610300 | 0.59826300  |
| H    | -3.03765000 | -0.14250800 | 0.55295800  |
| H    | -3.53741800 | -4.42220600 | 0.57434400  |
| N    | 1.28283500  | -1.29135300 | -0.26822300 |
| N    | -1.33116000 | -1.24835200 | 0.22714200  |
| Ru   | 0.00622900  | 0.34554100  | 0.00344800  |
| C    | 1.65052300  | 1.25391600  | 2.27638700  |
| C    | 0.11037000  | -0.35501300 | 2.98829400  |
| C    | 2.17522600  | 1.34791000  | 3.56907300  |
| C    | 0.58910000  | -0.30414000 | 4.29255700  |
| H    | -0.70389100 | -1.01124300 | 2.70635700  |
| C    | 1.64135500  | 0.56322300  | 4.58745100  |
| H    | 2.99337900  | 2.02463500  | 3.78176200  |
| H    | 0.14298800  | -0.93476200 | 5.05328800  |
| H    | 2.04234900  | 0.62908800  | 5.59334000  |
| C    | -1.59519200 | 1.39208800  | -2.24011500 |
| C    | -0.11947100 | -0.25362900 | -3.00251100 |
| C    | -2.10885300 | 1.55303900  | -3.53061300 |
| C    | -0.58964300 | -0.13797600 | -4.30576100 |

|   |             |             |             |
|---|-------------|-------------|-------------|
| H | 0.66555100  | -0.95252800 | -2.74085100 |
| C | -1.60306800 | 0.78269000  | -4.57391500 |
| H | -2.89648200 | 2.27093700  | -3.72224900 |
| H | -0.16665400 | -0.76005400 | -5.08646700 |
| H | -1.99575600 | 0.90037600  | -5.57835500 |
| C | -2.05778100 | 2.16215000  | -1.06887400 |
| C | -1.80028500 | 2.51664200  | 1.22709000  |
| C | -3.05458800 | 3.14105500  | -1.12492500 |
| C | -2.78339000 | 3.49964000  | 1.23432200  |
| H | -1.27878900 | 2.23101600  | 2.13272200  |
| C | -3.42302500 | 3.81600000  | 0.03546600  |
| H | -3.54053800 | 3.37654800  | -2.06351000 |
| H | -3.03671200 | 3.99958800  | 2.16237600  |
| H | -4.19638400 | 4.57609200  | 0.00154600  |
| C | 2.13984600  | 2.04519600  | 1.13040800  |
| C | 1.89269200  | 2.48552900  | -1.15192100 |
| C | 3.17240500  | 2.98403700  | 1.21646500  |
| C | 2.91232100  | 3.43031400  | -1.12908200 |
| H | 1.35924100  | 2.25003800  | -2.06494600 |
| C | 3.56458100  | 3.68274200  | 0.07812600  |
| H | 3.66732600  | 3.17051100  | 2.16131800  |
| H | 3.18323700  | 3.95088400  | -2.04067900 |
| H | 4.36570300  | 4.41203600  | 0.13537800  |
| N | -0.60358200 | 0.49083900  | -1.99118000 |
| N | -1.44343000 | 1.85791400  | 0.10911100  |
| N | 0.62195700  | 0.40310500  | 2.00095100  |
| N | 1.51278200  | 1.80386600  | -0.05547600 |
| C | -4.90679400 | -1.99448100 | 0.85741800  |
| O | -5.42237200 | -0.88640700 | 0.96825100  |
| O | -5.63714200 | -3.13675100 | 0.96971500  |
| H | -6.55776100 | -2.86262000 | 1.13941400  |
| C | 4.83900200  | -2.25853800 | -0.92276800 |
| O | 5.59154000  | -3.21517300 | -1.06827200 |
| O | 5.29166500  | -0.97541800 | -0.99125100 |
| H | 6.24996000  | -1.02788400 | -1.16429800 |

Sum of electronic and thermal Free Energies = -1956.828429 (Hartree/Particle).

**Table S7:** DFT-optimized geometry of **f-[Ce<sup>IV</sup>(H<sub>2</sub>O)-Ce<sup>IV</sup>(H<sub>2</sub>O)]** (singlet), computed at the B3LYP-D3/ 6-31G\* (HCNO)/ MWB28 (Ce) level in water solvent using PCM.

| Atom |    | x           | y           | z           |
|------|----|-------------|-------------|-------------|
| Ce   | -1 | 1.40782100  | -2.17451800 | -0.55217700 |
| Ce   | 0  | -1.02480700 | 1.85239900  | 1.92778900  |
| Ce   | -1 | -1.73336600 | -1.66311500 | 1.53850700  |
| Ce   | -1 | 2.17276200  | 1.56477300  | -0.07969800 |
| Ce   | -1 | -1.23134100 | 0.44504300  | -1.38659400 |
| Ce   | 0  | 1.68060800  | -0.69203300 | 2.94594200  |
| O    | -1 | -4.65566700 | 13.14812100 | -4.43658400 |
| C    | -1 | -4.15961900 | 10.82086000 | -2.81251100 |
| C    | -1 | -3.89386100 | 9.62509300  | -2.15460200 |
| O    | -1 | -6.00970700 | -9.95306200 | -7.78032200 |
| C    | -1 | -3.96036600 | -8.32228100 | -6.65139200 |
| C    | -1 | -3.10575800 | -7.41672800 | -6.03651200 |
| O    | -1 | 14.15469100 | -3.97575800 | 0.41883100  |

|   |    |              |              |             |
|---|----|--------------|--------------|-------------|
| C | -1 | 11.31904800  | -4.18076000  | 0.27317100  |
| C | -1 | 9.93230700   | -4.13368000  | 0.30503900  |
| O | -1 | 14.82196700  | 0.48136600   | 0.63767200  |
| C | -1 | 12.26386900  | 1.05185700   | 1.47822400  |
| O | -1 | -6.85969800  | 1.06761400   | 12.74743900 |
| C | -1 | -4.79624400  | 0.57742200   | 10.83699500 |
| C | -1 | -3.90872900  | 0.27480300   | 9.81176800  |
| O | -1 | -9.16791800  | -8.65645500  | -7.32400800 |
| C | -1 | -7.71252000  | -6.44277400  | -6.20194000 |
| C | -1 | -6.98884300  | -5.45966200  | -5.53810600 |
| C | -1 | -2.25382600  | 9.35183500   | -6.25480200 |
| C | -1 | -1.94594000  | 8.14803600   | -5.63617000 |
| O | -1 | -2.36074200  | 13.62624200  | -2.72855100 |
| C | -1 | -1.17719400  | 11.52066100  | -1.39405800 |
| C | -1 | 12.21595800  | -0.77347500  | -1.42206800 |
| C | -1 | 10.84826100  | -0.53758000  | -1.36026400 |
| O | -1 | -7.60508200  | -11.21613200 | -5.13904900 |
| C | -1 | -6.24108300  | -9.23477700  | -3.61115800 |
| C | -1 | -5.48999400  | -8.29842300  | -2.91329000 |
| O | -1 | -10.02701100 | 0.51759600   | 12.17236200 |
| C | -1 | -8.75211200  | -0.08068600  | 9.64519000  |
| C | -1 | -7.92061500  | -0.28469500  | 8.55089800  |
| O | -1 | 14.44286000  | -3.31575100  | -2.78597600 |
| C | -1 | 11.73239500  | -2.71765900  | -2.74372100 |
| O | -1 | -5.64909300  | -12.26785700 | -5.54102100 |
| C | -1 | -4.20009000  | -10.41193800 | -4.06789100 |
| O | -1 | -9.81519800  | 2.71410600   | 11.71807700 |
| C | -1 | -8.03759500  | 2.21194400   | 9.64249500  |
| O | -1 | -1.33958200  | 13.11283300  | -4.67725000 |
| C | -1 | -0.07862800  | 10.87526000  | -3.42821700 |
| C | -1 | 0.35192000   | 9.72694100   | -2.77671100 |
| O | -1 | 15.00885800  | -1.31098000  | 1.99629000  |
| C | -1 | 12.23332900  | -1.00799900  | 2.70886900  |
| C | -1 | 10.86924100  | -0.81514700  | 2.89565100  |
| C | -1 | 0.09890800   | 9.69156300   | -6.58455200 |
| O | -1 | -10.10325900 | -9.04884100  | -5.31272200 |
| C | -1 | -8.76627900  | -6.95426500  | -4.10718900 |
| O | -1 | -7.64278800  | -1.02685800  | 12.44937400 |
| C | -1 | -5.66588300  | -1.65029000  | 10.61947800 |
| O | -1 | 14.04639900  | -4.00959300  | 2.67465100  |
| C | -1 | 11.29069600  | -4.29194700  | 2.67049000  |
| O | -1 | -5.55606300  | 11.83040400  | -6.02622000 |
| C | -1 | -5.20883800  | 9.53144100   | -4.54375100 |
| O | -1 | -6.77312600  | -8.18364200  | -8.95933300 |
| C | -1 | -4.80807600  | -6.50651000  | -7.97155000 |
| O | -1 | 0.18084000   | -4.28369800  | -0.51702000 |
| C | -1 | -1.34773000  | -6.25530100  | -1.91055900 |
| O | -1 | -2.83872200  | 1.34768600   | 3.40885900  |
| C | -1 | -4.38116200  | 1.36223300   | 5.77259100  |
| O | -1 | 0.08677400   | 4.07661300   | 1.84425100  |
| C | -1 | 1.80764000   | 6.42085700   | -0.34677300 |
| C | -1 | 1.55112200   | 7.64046400   | -0.95987500 |
| O | -1 | 3.59118600   | -1.64707900  | -1.51747700 |
| C | -1 | 6.38972400   | -2.06341800  | -1.73521900 |
| O | -1 | -3.47313400  | -0.77581500  | 3.00211900  |
| C | -1 | -5.58795300  | -0.50216900  | 4.87006600  |
| C | -1 | -6.47016400  | -0.37908000  | 5.93650400  |
| O | -1 | 2.00700800   | 3.82444600   | 0.69474200  |
| C | -1 | -0.37076600  | 6.56912300   | 0.64810200  |
| O | -1 | 3.91815400   | 0.57651600   | -1.37867400 |

|   |    |             |             |             |
|---|----|-------------|-------------|-------------|
| C | -1 | 6.63189200  | 0.31331000  | -1.93681200 |
| C | -1 | 8.00236100  | 0.11291600  | -2.03188500 |
| O | -1 | -1.52591500 | -3.98094500 | 0.92206500  |
| C | -1 | -2.99034100 | -6.04582700 | -0.17681100 |
| C | -1 | -3.75626300 | -6.97951400 | -0.85971600 |
| O | -1 | -0.85209900 | -1.00743700 | -3.31288800 |
| C | -1 | -2.23393400 | -2.94092800 | -4.81423000 |
| O | -1 | 3.24576200  | -2.49736100 | 2.73092100  |
| C | -1 | 6.00521400  | -3.03639700 | 2.66120500  |
| O | 0  | 1.48315400  | 0.79335900  | 5.03688900  |
| O | -1 | -2.60160700 | 2.42912600  | -1.35267400 |
| C | -1 | -3.34339400 | 4.91738600  | -2.41838600 |
| O | -1 | -2.52182200 | 3.29073300  | 0.72707300  |
| C | -1 | -3.58691100 | 5.73507100  | -0.17936200 |
| C | -1 | -3.94138000 | 6.96430400  | -0.72350300 |
| O | -1 | 0.77349800  | -2.49027500 | -2.83138300 |
| C | -1 | -0.34284000 | -4.39442000 | -4.55520400 |
| C | -1 | -1.04650700 | -5.35073900 | -5.27621500 |
| O | -1 | 2.98018200  | -3.45769500 | 0.70908400  |
| C | -1 | 5.61900400  | -4.37001000 | 0.70262200  |
| C | -1 | 6.98638800  | -4.60503400 | 0.65837700  |
| O | 0  | -0.45060100 | 2.68574200  | 4.38922700  |
| O | -1 | -3.57309100 | -2.12548500 | 0.03093900  |
| C | -1 | -5.23214400 | -3.81515100 | -1.45779900 |
| O | -1 | 1.71694900  | 2.82766000  | -2.13276600 |
| C | -1 | 1.13564900  | 5.28632700  | -3.48315800 |
| O | -1 | 4.12262500  | 1.67009600  | 1.31893900  |
| C | -1 | 6.65733100  | 0.22155800  | 3.49563500  |
| C | -1 | 8.03810100  | 0.05767300  | 3.50157200  |
| O | -1 | -1.36929200 | -2.73880800 | 3.69554100  |
| C | -1 | -2.83977000 | -2.35274000 | 6.03134600  |
| O | -1 | -3.30639400 | -0.74432200 | -1.72808300 |
| C | -1 | -5.17338400 | -2.21648600 | -3.24224900 |
| C | -1 | -5.97637600 | -3.08418800 | -3.97350200 |
| O | -1 | 0.52308200  | -1.97352000 | 4.65256100  |
| C | -1 | -0.93725400 | -1.24516700 | 6.97648000  |
| C | -1 | -1.73737100 | -0.90972000 | 8.06245200  |
| O | -1 | 3.85308100  | 0.36062600  | 3.13197800  |
| C | -1 | 6.88216500  | 1.24572700  | 1.33953000  |
| O | -1 | -0.18590500 | 1.94154700  | -2.95287400 |
| C | -1 | -0.73038200 | 4.16017400  | -4.48174800 |
| C | -1 | -1.04595100 | 5.35238900  | -5.11658000 |
| O | -1 | 2.12856400  | -0.50635200 | 0.80921000  |
| O | -1 | 0.00474000  | 1.77419800  | -0.01929500 |
| O | -1 | -0.45639600 | -0.18018800 | 2.66108600  |
| O | -1 | -0.67374900 | -1.50969600 | -0.43467700 |
| O | -1 | 0.59536300  | -2.42169800 | 1.71551600  |
| O | -1 | 1.18767200  | -0.01703800 | -1.58674100 |
| O | -1 | 1.40475900  | 1.58589000  | 2.28182200  |
| O | -1 | -2.08527300 | 0.38340100  | 0.69693500  |
| C | -1 | -4.98928700 | 12.04045700 | -4.82430100 |
| C | -1 | -4.81113900 | 10.78430600 | -4.04891300 |
| C | -1 | -4.29190800 | 8.41868800  | -2.75178100 |
| C | -1 | -5.90619700 | -8.78762600 | -8.12007900 |
| C | -1 | -4.85752200 | -7.86328100 | -7.61904300 |
| C | -1 | -3.16937300 | -6.06713000 | -6.42123200 |
| C | -1 | 13.50242700 | -4.08210900 | 1.44215400  |
| C | -1 | 12.02539700 | -4.23095500 | 1.47668000  |
| C | -1 | 9.28886000  | -4.14856800 | 1.55303400  |
| C | -1 | 14.35608100 | -0.37377100 | 1.57042000  |

|   |    |             |              |             |
|---|----|-------------|--------------|-------------|
| C | -1 | 12.95001700 | -0.07880800  | 1.95091900  |
| C | -1 | 10.25783500 | 0.31194100   | 2.32593000  |
| C | -1 | -6.75486600 | -0.03710900  | 12.24072400 |
| C | -1 | -5.70384700 | -0.39923300  | 11.25498400 |
| C | -1 | -3.96655200 | -0.99584800  | 9.21877400  |
| C | -1 | -9.30496900 | -8.36016700  | -6.14808600 |
| C | -1 | -8.61078400 | -7.22989400  | -5.47601000 |
| C | -1 | -7.17895900 | -5.29072300  | -4.15839300 |
| C | -1 | -1.21704400 | 10.15415200  | -6.73669200 |
| C | -1 | -0.59674900 | 7.77475700   | -5.52521100 |
| C | -1 | -1.51604400 | 12.90051000  | -3.49075400 |
| C | -1 | -0.88652300 | 11.78467000  | -2.74045900 |
| C | -1 | -0.03937500 | 9.52587900   | -1.44312200 |
| C | -1 | 12.68051200 | -1.89282900  | -2.11710700 |
| C | -1 | 9.97737200  | -1.42726800  | -2.00951000 |
| C | -1 | -6.39673100 | -11.28575000 | -5.00125700 |
| C | -1 | -5.59201200 | -10.31672300 | -4.21222100 |
| C | -1 | -4.09899000 | -8.47947900  | -2.82919300 |
| C | -1 | -9.60498600 | 1.41298800   | 11.45522200 |
| C | -1 | -8.81222900 | 1.19394300   | 10.21895100 |
| C | -1 | -7.16834400 | 0.79296400   | 8.05439300  |
| C | -1 | -0.96652100 | -4.56795800  | -0.05583800 |
| C | -1 | -1.76146600 | -5.65178900  | -0.71589700 |
| C | -1 | -3.27148400 | -7.50163000  | -2.06855200 |
| C | -1 | -3.54498700 | 0.31317900   | 3.63818600  |
| C | -1 | -4.52339700 | 0.39462000   | 4.76700400  |
| C | -1 | -6.24425600 | 0.62032600   | 6.89608900  |
| C | -1 | 0.98356000  | 4.49489000   | 1.05680100  |
| C | -1 | 0.81960600  | 5.85387700   | 0.46300000  |
| C | -1 | 0.31107300  | 8.26095100   | -0.74271600 |
| C | -1 | 4.32562000  | -0.61535400  | -1.54835700 |
| C | -1 | 5.79613700  | -0.79390800  | -1.76331600 |
| C | -1 | 8.50563900  | -1.19511200  | -1.95530600 |
| C | -1 | -0.29619000 | -2.13857200  | -3.42927100 |
| C | -1 | -0.95006500 | -3.16193700  | -4.29726700 |
| C | -1 | -2.34428800 | -5.04758900  | -5.71792200 |
| C | -1 | 3.67320700  | -3.15045400  | 1.72817100  |
| C | -1 | 5.10966900  | -3.54917700  | 1.71292900  |
| C | -1 | 7.80923300  | -4.00436400  | 1.62440000  |
| C | -1 | -2.77234600 | 3.36621000   | -0.51581900 |
| C | -1 | -3.26152900 | 4.68201500   | -1.03853600 |
| C | -1 | -3.96065800 | 7.10998200   | -2.11923300 |
| C | -1 | -3.82390400 | -1.75139700  | -1.15550100 |
| C | -1 | -4.77215900 | -2.58819700  | -1.95627400 |
| C | -1 | -6.36028700 | -4.30516100  | -3.39709600 |
| C | -1 | 0.67033700  | 2.87377400   | -2.84807300 |
| C | -1 | 0.37445500  | 4.11860700   | -3.62666100 |
| C | -1 | -0.24360200 | 6.47854100   | -4.88146300 |
| C | -1 | 4.56925000  | 0.96499700   | 2.27667100  |
| C | -1 | 6.05305800  | 0.82079100   | 2.38745600  |
| C | -1 | 8.78057500  | 0.49933600   | 2.39496400  |
| C | -1 | -0.72192600 | -2.26074200  | 4.67217300  |
| C | -1 | -1.49451000 | -1.96743000  | 5.91879900  |
| C | -1 | -3.07378600 | -1.33701300  | 8.07693900  |
| H | -1 | 1.46660000  | 0.03353500   | -2.51525900 |
| H | -1 | 1.85025800  | 2.33825200   | 2.70119900  |
| H | -1 | 0.63445700  | -3.32259300  | 2.07497200  |
| C | -1 | 14.13936200 | -2.18251800  | -2.12402400 |
| O | -1 | 14.98146700 | -1.47962000  | -1.59283800 |
| H | -1 | 15.40809600 | -3.44398100  | -2.71574400 |



|   |    |              |              |             |
|---|----|--------------|--------------|-------------|
| H | -1 | -7.57380100  | -8.74279300  | -9.01284000 |
| H | -1 | -6.24833600  | -12.83648900 | -6.06097900 |
| H | -1 | -10.45549700 | -9.81365600  | -5.80685200 |
| H | -1 | 15.64666700  | 0.10507000   | 0.27437100  |
| H | -1 | -2.94180900  | 14.12939300  | -3.33276200 |
| C | -1 | -1.55762300  | 11.46472800  | -7.34964700 |
| O | -1 | -2.69515700  | 11.88292700  | -7.47295500 |
| O | -1 | -0.47316900  | 12.14205500  | -7.77453400 |
| H | -1 | -0.78554100  | 12.99471700  | -8.13255600 |
| H | -1 | -5.56366100  | 12.68396800  | -6.50013100 |
| H | -1 | -10.30166800 | 2.77086000   | 12.56352100 |
| H | -1 | -8.44096600  | -0.63215400  | 12.86049800 |
| H | -1 | 14.95222500  | -3.65815700  | 2.57354100  |
| H | -1 | 0.10509500   | -0.95700800  | 6.94355200  |
| H | -1 | -1.32702500  | -0.35372600  | 8.89827500  |
| H | -1 | -3.30132100  | -2.90903600  | 5.22134900  |
| H | -1 | -3.21747000  | 1.02426200   | 9.44400600  |
| H | -1 | -4.81721300  | 1.56046600   | 11.29512800 |
| H | -1 | -6.35104600  | -2.43555900  | 10.92535000 |
| H | -1 | 5.62933800   | -2.40512200  | 3.46027000  |
| H | -1 | 7.41265900   | -5.23792600  | -0.11155600 |
| H | -1 | 4.94824000   | -4.79549700  | -0.03588300 |
| H | -1 | 11.80550200  | -4.35788000  | 3.62509900  |
| H | -1 | 11.86562200  | -4.13770000  | -0.65999700 |
| H | -1 | 9.36299500   | -4.01182800  | -0.60976600 |
| H | -1 | 5.76332200   | -2.94101000  | -1.61142100 |
| H | -1 | 12.05636500  | -3.59249300  | -3.30088000 |
| H | -1 | 12.92794800  | -0.11957900  | -0.93329200 |
| H | -1 | 10.45587300  | 0.29555900   | -0.78763400 |
| H | -1 | 8.67308800   | 0.95309800   | -2.16994000 |
| H | -1 | 6.20375200   | 1.30819300   | -1.98692800 |
| H | -1 | 2.00344400   | 5.27949400   | -2.83191200 |
| H | -1 | 0.93105500   | 10.28542300  | -6.95299300 |
| H | -1 | -3.27671800  | 9.68884300   | -6.36422400 |
| H | -1 | -2.72753500  | 7.51902100   | -5.22286400 |
| H | -1 | -1.89741500  | 5.41424700   | -5.78454100 |
| H | -1 | -1.32787300  | 3.26773200   | -4.62890300 |
| H | -1 | -3.55733300  | 5.58366700   | 0.89389000  |
| H | -1 | -4.20699600  | 7.79361200   | -0.07803300 |
| H | -1 | -3.10694200  | 4.11397300   | -3.10819400 |
| H | -1 | -5.74252400  | 9.46407000   | -5.48793800 |
| H | -1 | -3.84542200  | 11.77310400  | -2.40171200 |
| H | -1 | -3.33850900  | 9.62336300   | -1.22358300 |
| H | -1 | -3.55851200  | 2.07111500   | 5.71766600  |
| H | -1 | -5.72849600  | -1.26199500  | 4.10911100  |
| H | -1 | -7.33276000  | -1.03218400  | 6.00718200  |
| H | -1 | -8.05503700  | 3.21266500   | 10.06577400 |
| H | -1 | -9.32612700  | -0.89328400  | 10.07715100 |
| H | -1 | -7.82617800  | -1.27325600  | 8.11751600  |
| H | -1 | 0.65627600   | -4.59053900  | -4.18170000 |
| H | -1 | -0.60128100  | -6.31483800  | -5.49325400 |
| H | -1 | -2.46075100  | -7.73187000  | -5.22327500 |
| H | -1 | -3.97796600  | -9.36584800  | -6.36512200 |
| H | -1 | -5.47278600  | -6.11773200  | -8.73817000 |
| H | -1 | -2.72097500  | -1.98836100  | -4.63271800 |
| H | -1 | -0.39374400  | -5.97568100  | -2.34720800 |
| H | -1 | -4.71150600  | -7.30356200  | -0.46341700 |
| H | -1 | -3.33025400  | -5.61311000  | 0.75687500  |
| H | -1 | -5.96249000  | -7.42788400  | -2.46996500 |
| H | -1 | -7.31511100  | -9.13866200  | -3.71254600 |

|   |    |             |              |             |
|---|----|-------------|--------------|-------------|
| H | -1 | -3.66156300 | -11.24097500 | -4.51940200 |
| H | -1 | -4.84883700 | -1.26773200  | -3.65490600 |
| H | -1 | -6.30648300 | -2.81645400  | -4.97069500 |
| H | -1 | -4.94040200 | -4.12506100  | -0.45999300 |
| H | -1 | -9.47582800 | -7.52520800  | -3.51456700 |
| H | -1 | -7.57331700 | -6.62732800  | -7.25998500 |
| H | -1 | -6.24703900 | -4.87325200  | -6.06818200 |
| H | -1 | 6.43592800  | 1.71202100   | 0.46718900  |
| H | -1 | 12.79430100 | 1.81473200   | 0.91487100  |
| H | -1 | 12.73779000 | -1.88544300  | 3.09590800  |
| H | -1 | 10.27858000 | -1.56280800  | 3.41199400  |
| H | -1 | 8.53150900  | -0.39550700  | 4.35384000  |
| H | -1 | 6.04839700  | -0.10891300  | 4.33028200  |
| H | -1 | 2.29508400  | 8.10456000   | -1.59716100 |
| H | -1 | 2.74531300  | 5.89809800   | -0.49995000 |
| H | -1 | -1.14775300 | 6.14773700   | 1.27788800  |
| H | -1 | 0.90988500  | 8.96435200   | -3.30967500 |
| H | -1 | 0.16179900  | 11.05958900  | -4.46753800 |
| H | -1 | -1.78012700 | 12.21857500  | -0.81963500 |
| N | -1 | -2.07208700 | -7.15828000  | -2.57801500 |
| N | -1 | -3.46310400 | -9.51908500  | -3.40320500 |
| N | -1 | -2.92071300 | -3.84811100  | -5.50885600 |
| N | -1 | -3.99456700 | -5.62419100  | -7.39132900 |
| N | -1 | -6.00115600 | -4.65811200  | -2.14717700 |
| N | -1 | -8.07020200 | -6.02137700  | -3.45702100 |
| N | -1 | 10.95818400 | 1.24841500   | 1.65216800  |
| N | -1 | 8.20529800  | 1.09338700   | 1.33011000  |
| N | -1 | -0.77639100 | 10.42134900  | -0.75585200 |
| N | -1 | -0.62972600 | 7.74191700   | 0.07006000  |
| N | -1 | -5.20524400 | 1.47682200   | 6.81378300  |
| N | -1 | -7.23496600 | 2.02528400   | 8.59619400  |
| N | -1 | -3.61048600 | -2.07117100  | 7.08190100  |
| N | -1 | -4.83055700 | -1.94779100  | 9.62439200  |
| N | -1 | 7.32065300  | -3.25120400  | 2.62904600  |
| N | -1 | 9.95913200  | -4.24607700  | 2.71882000  |
| N | -1 | 7.70563700  | -2.27236700  | -1.82761800 |
| N | -1 | 10.41535300 | -2.50400300  | -2.69194400 |
| N | -1 | 0.41229700  | 8.53735800   | -5.98994500 |
| N | -1 | 0.84602900  | 6.44191300   | -4.08942400 |
| N | -1 | -3.67916300 | 6.09066000   | -2.95542800 |
| N | -1 | -4.95626400 | 8.37834400   | -3.92500500 |
| H | 0  | 1.14638800  | 0.27311500   | 5.78370900  |
| H | 0  | 0.82047200  | 1.51041300   | 4.89474900  |
| H | 0  | -1.24698300 | 2.65361000   | 4.94969400  |
| H | 0  | -0.16136900 | 3.61698500   | 4.37350700  |

Sum of electronic and thermal Free Energies = -13200.795160 (Hartree/Particle).

**Table S8:** DFT-optimized geometry of  $\mathbf{f-[Ce^{IV}(H_2O)-Ce^{III}]^-}$  (doublet), computed at the UB3LYP-D3/ 6-31G\* (HCNO)/ MWB28 (Ce) level in water solvent using PCM.

| Atom |    | x           | y           | z           |
|------|----|-------------|-------------|-------------|
| Ce   | -1 | 1.41621700  | -2.16593500 | -0.53072900 |
| Ce   | 0  | -0.96144000 | 1.78918700  | 1.98011900  |
| Ce   | -1 | -1.73017800 | -1.66435500 | 1.55448200  |

|    |    |              |              |             |
|----|----|--------------|--------------|-------------|
| Ce | -1 | 2.17618600   | 1.57263800   | -0.04482200 |
| Ce | -1 | -1.22381300  | 0.45349200   | -1.36286500 |
| Ce | 0  | 1.73159400   | -0.70252800  | 3.06749600  |
| O  | -1 | -4.65458800  | 13.16247900  | -4.38074100 |
| C  | -1 | -4.15974500  | 10.83065700  | -2.76285400 |
| C  | -1 | -3.89420900  | 9.63311200   | -2.10809700 |
| O  | -1 | -5.97693400  | -9.92951000  | -7.79982500 |
| C  | -1 | -3.93183700  | -8.30014300  | -6.66119600 |
| C  | -1 | -3.07955900  | -7.39563200  | -6.04156800 |
| O  | -1 | 14.16276300  | -3.95695200  | 0.46325000  |
| C  | -1 | 11.32767100  | -4.16444700  | 0.31058300  |
| C  | -1 | 9.94081200   | -4.11890900  | 0.33948500  |
| O  | -1 | 14.82487900  | 0.50015600   | 0.69754400  |
| C  | -1 | 12.26430700  | 1.06534800   | 1.53413200  |
| O  | -1 | -6.88448100  | 1.02590100   | 12.76038100 |
| C  | -1 | -4.81623800  | 0.54384500   | 10.85304900 |
| C  | -1 | -3.92611000  | 0.24536300   | 9.82887500  |
| O  | -1 | -9.13751500  | -8.63762500  | -7.34654500 |
| C  | -1 | -7.68695700  | -6.42595700  | -6.21428700 |
| C  | -1 | -6.96580000  | -5.44417900  | -5.54575500 |
| C  | -1 | -2.24470300  | 9.37440900   | -6.20543900 |
| C  | -1 | -1.93694300  | 8.16899900   | -5.58989100 |
| O  | -1 | -2.36399900  | 13.63763200  | -2.66607200 |
| C  | -1 | -1.18124100  | 11.52911200  | -1.33552600 |
| C  | -1 | 12.22480800  | -0.75093500  | -1.37196100 |
| C  | -1 | 10.85673100  | -0.51665800  | -1.31249000 |
| O  | -1 | -7.57690100  | -11.20250900 | -5.16610800 |
| C  | -1 | -6.21840700  | -9.22453300  | -3.62896300 |
| C  | -1 | -5.46986400  | -8.28958900  | -2.92648200 |
| O  | -1 | -10.04992000 | 0.47439300   | 12.17647600 |
| C  | -1 | -8.76873300  | -0.11464100  | 9.65031200  |
| C  | -1 | -7.93457100  | -0.31435600  | 8.55725600  |
| O  | -1 | 14.45742300  | -3.28660600  | -2.73882000 |
| C  | -1 | 11.74624600  | -2.69147100  | -2.70077800 |
| O  | -1 | -5.61891600  | -12.25093400 | -5.56697900 |
| C  | -1 | -4.17516300  | -10.39813200 | -4.08479600 |
| O  | -1 | -9.83938900  | 2.67253400   | 11.72954800 |
| C  | -1 | -8.05661200  | 2.17872800   | 9.65639900  |
| O  | -1 | -1.33793700  | 13.13139500  | -4.61407200 |
| C  | -1 | -0.07744200  | 10.89123200  | -3.36922300 |
| C  | -1 | 0.35284700   | 9.74132600   | -2.72035000 |
| O  | -1 | 15.01059900  | -1.29624200  | 2.05095800  |
| C  | -1 | 12.23316500  | -0.99838400  | 2.75825000  |
| C  | -1 | 10.86846100  | -0.80753800  | 2.94257100  |
| C  | -1 | 0.10840700   | 9.71761700   | -6.52884300 |
| O  | -1 | -10.07695100 | -9.03728500  | -5.33860300 |
| C  | -1 | -8.74487300  | -6.94510500  | -4.12351900 |
| O  | -1 | -7.66470600  | -1.06844100  | 12.45400300 |
| C  | -1 | -5.68305200  | -1.68407800  | 10.62660700 |
| O  | -1 | 14.04945000  | -3.99796800  | 2.71870400  |
| C  | -1 | 11.29406000  | -4.28317400  | 2.70747300  |
| O  | -1 | -5.55003800  | 11.84881400  | -5.97651300 |
| C  | -1 | -5.20372900  | 9.54557900   | -4.50047300 |
| O  | -1 | -6.73956000  | -8.15719900  | -8.97500100 |
| C  | -1 | -4.77848600  | -6.48112700  | -7.97756200 |
| O  | -1 | 0.19137500   | -4.27649500  | -0.50492900 |
| C  | -1 | -1.33200100  | -6.24531100  | -1.90806200 |
| O  | -1 | -2.84290000  | 1.33935800   | 3.43187000  |
| C  | -1 | -4.39060100  | 1.34494200   | 5.79232400  |
| O  | -1 | 0.08310600   | 4.07636400   | 1.88248000  |

|   |    |             |             |             |
|---|----|-------------|-------------|-------------|
| C | -1 | 1.80657700  | 6.42916000  | -0.29751400 |
| C | -1 | 1.55015700  | 7.65041600  | -0.90737000 |
| O | -1 | 3.60119200  | -1.63320900 | -1.48946700 |
| C | -1 | 6.40064600  | -2.04595100 | -1.70222800 |
| O | -1 | -3.47415300 | -0.78345500 | 3.01696300  |
| C | -1 | -5.59343700 | -0.51786700 | 4.88100700  |
| C | -1 | -6.47816500 | -0.39903900 | 5.94584200  |
| O | -1 | 2.00635100  | 3.82972300  | 0.73634700  |
| C | -1 | -0.37420800 | 6.57204300  | 0.69292700  |
| O | -1 | 3.92551900  | 0.59028200  | -1.34297000 |
| C | -1 | 6.64077500  | 0.33164800  | -1.89583400 |
| C | -1 | 8.01166300  | 0.13297800  | -1.98845800 |
| O | -1 | -1.51892400 | -3.98003000 | 0.93126400  |
| C | -1 | -2.97871200 | -6.04298000 | -0.17735800 |
| C | -1 | -3.74212400 | -6.97531800 | -0.86490100 |
| O | -1 | -0.83873300 | -0.99256300 | -3.29284000 |
| C | -1 | -2.21516500 | -2.92278000 | -4.80332300 |
| O | -1 | 3.24712400  | -2.49714200 | 2.75542700  |
| C | -1 | 6.00730000  | -3.03310100 | 2.69025400  |
| O | -1 | -2.59621700 | 2.43601900  | -1.32580300 |
| C | -1 | -3.33822300 | 4.92683000  | -2.38538300 |
| O | -1 | -2.52200100 | 3.29118500  | 0.75680400  |
| C | -1 | -3.58761400 | 5.73724100  | -0.14436200 |
| C | -1 | -3.94214900 | 6.96780500  | -0.68544600 |
| O | -1 | 0.78734100  | -2.47521300 | -2.81232900 |
| C | -1 | -0.32313500 | -4.37510900 | -4.54460500 |
| C | -1 | -1.02418300 | -5.32989500 | -5.27018500 |
| O | -1 | 2.98709400  | -3.45142800 | 0.73003700  |
| C | -1 | 5.62687900  | -4.36097100 | 0.72664300  |
| C | -1 | 6.99460400  | -4.59443200 | 0.68473200  |
| O | 0  | -0.62822700 | 2.90851800  | 4.35947100  |
| O | -1 | -3.56603800 | -2.12391500 | 0.04136200  |
| C | -1 | -5.21997400 | -3.81063400 | -1.45638600 |
| O | -1 | 1.72365300  | 2.84148600  | -2.09494800 |
| C | -1 | 1.14280800  | 5.30376500  | -3.43893700 |
| O | -1 | 4.12279600  | 1.67561100  | 1.35850800  |
| C | -1 | 6.65413200  | 0.22290100  | 3.53634200  |
| C | -1 | 8.03505700  | 0.06043400  | 3.54486600  |
| O | -1 | -1.36981100 | -2.74642400 | 3.70895900  |
| C | -1 | -2.84592800 | -2.36920800 | 6.04265400  |
| O | -1 | -3.29684500 | -0.73696400 | -1.71273200 |
| C | -1 | -5.15888900 | -2.20632400 | -3.23568500 |
| C | -1 | -5.95933000 | -3.07256700 | -3.97145200 |
| O | -1 | 0.51962600  | -1.98214300 | 4.67264600  |
| C | -1 | -0.94669600 | -1.26262400 | 6.99552000  |
| C | -1 | -1.74959700 | -0.93141400 | 8.08073700  |
| O | -1 | 3.85054300  | 0.36016900  | 3.16682400  |
| C | -1 | 6.88272600  | 1.25405400  | 1.38396500  |
| O | -1 | -0.17642500 | 1.95596600  | -2.92209400 |
| C | -1 | -0.71980000 | 4.17880600  | -4.44523500 |
| C | -1 | -1.03519400 | 5.37267500  | -5.07703700 |
| O | -1 | 2.13213600  | -0.50129900 | 0.83752100  |
| O | -1 | 0.00778500  | 1.77966700  | 0.01136300  |
| O | -1 | -0.45725400 | -0.18366200 | 2.68455800  |
| O | -1 | -0.66631000 | -1.50365600 | -0.41582200 |
| O | -1 | 0.59896300  | -2.42103800 | 1.73434800  |
| O | -1 | 1.19613500  | -0.00545900 | -1.55902400 |
| O | -1 | 1.40286600  | 1.58546200  | 2.31501400  |
| O | -1 | -2.08228200 | 0.38438300  | 0.71852200  |
| C | -1 | -4.98617700 | 12.05568900 | -4.77267200 |

|   |    |             |              |             |
|---|----|-------------|--------------|-------------|
| C | -1 | -4.80845200 | 10.79730000  | -4.00082400 |
| C | -1 | -4.28965300 | 8.42817100   | -2.70994300 |
| C | -1 | -5.87388300 | -8.76290700  | -8.13569800 |
| C | -1 | -4.82730200 | -7.83904700  | -7.62941800 |
| C | -1 | -3.14372400 | -6.04490200  | -6.42220200 |
| C | -1 | 13.50831800 | -4.06718700  | 1.48476800  |
| C | -1 | 12.03137200 | -4.21767800  | 1.51551100  |
| C | -1 | 9.29458600  | -4.13837700  | 1.58598000  |
| C | -1 | 14.35779800 | -0.35838400  | 1.62656100  |
| C | -1 | 12.95057700 | -0.06607700  | 2.00482400  |
| C | -1 | 10.25715300 | 0.32069400   | 2.37501200  |
| C | -1 | -6.77735700 | -0.07712000  | 12.25044700 |
| C | -1 | -5.72375200 | -0.43506000  | 11.26593900 |
| C | -1 | -3.98127200 | -1.02348400  | 9.23177700  |
| C | -1 | -9.27751300 | -8.34516600  | -6.17001100 |
| C | -1 | -8.58602100 | -7.21628300  | -5.49284300 |
| C | -1 | -7.15918400 | -5.27976100  | -4.16595100 |
| C | -1 | -1.20768300 | 10.17931000  | -6.68248700 |
| C | -1 | -0.58761400 | 7.79677900   | -5.47707300 |
| C | -1 | -1.51683400 | 12.91517200  | -3.42864600 |
| C | -1 | -0.88782900 | 11.79764100  | -2.68043700 |
| C | -1 | -0.04122600 | 9.53567900   | -1.38828000 |
| C | -1 | 12.69209200 | -1.86762100  | -2.06945700 |
| C | -1 | 9.98823200  | -1.40521300  | -1.96647100 |
| C | -1 | -6.36879100 | -11.27130100 | -5.02582300 |
| C | -1 | -5.56685700 | -10.30391500 | -4.23195200 |
| C | -1 | -4.07886500 | -8.46946100  | -2.83983000 |
| C | -1 | -9.62722600 | 1.37246600   | 11.46309200 |
| C | -1 | -8.83147000 | 1.15812100   | 10.22792500 |
| C | -1 | -7.18231800 | 0.76563600   | 8.06581800  |
| C | -1 | -0.95671800 | -4.56339200  | -0.04721500 |
| C | -1 | -1.74904700 | -5.64597600  | -0.71244800 |
| C | -1 | -3.25409000 | -7.49313900  | -2.07427500 |
| C | -1 | -3.54851900 | 0.30341700   | 3.65623200  |
| C | -1 | -4.52959200 | 0.38034600   | 4.78314500  |
| C | -1 | -6.25545500 | 0.59759000   | 6.90905600  |
| C | -1 | 0.98140000  | 4.49787300   | 1.09816300  |
| C | -1 | 0.81730500  | 5.85860200   | 0.50822900  |
| C | -1 | 0.30897500  | 8.26893000   | -0.69105400 |
| C | -1 | 4.33461200  | -0.60062800  | -1.51546700 |
| C | -1 | 5.80579400  | -0.77697700  | -1.72768300 |
| C | -1 | 8.51613800  | -1.17475900  | -1.91484500 |
| C | -1 | -0.28137200 | -2.12275200  | -3.41151300 |
| C | -1 | -0.93222600 | -3.14407100  | -4.28417300 |
| C | -1 | -2.32128700 | -5.02671300  | -5.71385200 |
| C | -1 | 3.67750900  | -3.14665500  | 1.75163100  |
| C | -1 | 5.11442100  | -3.54383900  | 1.73836900  |
| C | -1 | 7.81465200  | -3.99593600  | 1.65447600  |
| C | -1 | -2.76981700 | 3.37029500   | -0.48640500 |
| C | -1 | -3.25920400 | 4.68722200   | -1.00609600 |
| C | -1 | -3.95845200 | 7.11783600   | -2.08075300 |
| C | -1 | -3.81457800 | -1.74637400  | -1.14446700 |
| C | -1 | -4.76015800 | -2.58164500  | -1.94998200 |
| C | -1 | -6.34325400 | -4.29573900  | -3.39973500 |
| C | -1 | 0.67860000  | 2.88875000   | -2.81245500 |
| C | -1 | 0.38316100  | 4.13570900   | -3.58780400 |
| C | -1 | -0.23455300 | 6.49891900   | -4.83659500 |
| C | -1 | 4.56800500  | 0.96798900   | 2.31502500  |
| C | -1 | 6.05171900  | 0.82497500   | 2.42869200  |
| C | -1 | 8.77954700  | 0.50633500   | 2.44131600  |

|   |    |              |              |             |
|---|----|--------------|--------------|-------------|
| C | -1 | -0.72513900  | -2.27074900  | 4.68852500  |
| C | -1 | -1.50082300  | -1.98215000  | 5.93433400  |
| C | -1 | -3.08559200  | -1.36014000  | 8.09088600  |
| H | -1 | 1.47708900   | 0.04831400   | -2.48674900 |
| H | -1 | 1.84663100   | 2.33704900   | 2.73779200  |
| H | -1 | 0.63817200   | -3.32304400  | 2.09107600  |
| C | -1 | 14.15125600  | -2.15577000  | -2.07400700 |
| O | -1 | 14.99143100  | -1.45366500  | -1.53873200 |
| H | -1 | 15.42263400  | -3.41405200  | -2.66682300 |
| H | -1 | -7.53952700  | -8.71701200  | -9.03205600 |
| H | -1 | -6.21639500  | -12.81855600 | -6.09005900 |
| H | -1 | -10.42728000 | -9.80091200  | -5.83591500 |
| H | -1 | 15.65078400  | 0.12585900   | 0.33491800  |
| H | -1 | -2.94423600  | 14.14207000  | -3.27000800 |
| C | -1 | -1.54826100  | 11.49144600  | -7.29210000 |
| O | -1 | -2.68595200  | 11.90884500  | -7.41664900 |
| O | -1 | -0.46356600  | 12.17122900  | -7.71242800 |
| H | -1 | -0.77602800  | 13.02468300  | -8.06847800 |
| H | -1 | -5.55746800  | 12.70385000  | -6.44776600 |
| H | -1 | -10.32781200 | 2.72613300   | 12.57407100 |
| H | -1 | -8.46421600  | -0.67585800  | 12.86456800 |
| H | -1 | 14.95513100  | -3.64527400  | 2.62072900  |
| H | -1 | 0.09542300   | -0.97328000  | 6.96583400  |
| H | -1 | -1.34170700  | -0.37761500  | 8.91921600  |
| H | -1 | -3.30507900  | -2.92344300  | 5.22988500  |
| H | -1 | -3.23481300  | 0.99668900   | 9.46501400  |
| H | -1 | -4.83926300  | 1.52542500   | 11.31421000 |
| H | -1 | -6.36807700  | -2.47101500  | 10.92848000 |
| H | -1 | 5.62897200   | -2.40472300  | 3.49044600  |
| H | -1 | 7.42326200   | -5.22446400  | -0.08622000 |
| H | -1 | 4.95821800   | -4.78483900  | -0.01469500 |
| H | -1 | 11.80679400  | -4.35156200  | 3.66302300  |
| H | -1 | 11.87628900  | -4.11789400  | -0.62121600 |
| H | -1 | 9.37342500   | -3.99478300  | -0.57621000 |
| H | -1 | 5.77488700   | -2.92457700  | -1.58258500 |
| H | -1 | 12.07238000  | -3.56421800  | -3.25994400 |
| H | -1 | 12.93501600  | -0.09783400  | -0.87954400 |
| H | -1 | 10.46218800  | 0.31427500   | -0.73813500 |
| H | -1 | 8.68181700   | 0.97428600   | -2.12237500 |
| H | -1 | 6.21170700   | 1.32623600   | -1.94379600 |
| H | -1 | 2.00914700   | 5.29579500   | -2.78576900 |
| H | -1 | 0.94075600   | 10.31349300  | -6.89355300 |
| H | -1 | -3.26769900  | 9.71069500   | -6.31610200 |
| H | -1 | -2.71880300  | 7.53787900   | -5.18031200 |
| H | -1 | -1.88522200  | 5.43574000   | -5.74671100 |
| H | -1 | -1.31602400  | 3.28620900   | -4.59652300 |
| H | -1 | -3.56028300  | 5.58250700   | 0.92847400  |
| H | -1 | -4.21008100  | 7.79481000   | -0.03798100 |
| H | -1 | -3.09938300  | 4.12582900   | -3.07717100 |
| H | -1 | -5.73522700  | 9.48061200   | -5.44606300 |
| H | -1 | -3.84746700  | 11.78193700  | -2.34837100 |
| H | -1 | -3.34094500  | 9.62904300   | -1.17584400 |
| H | -1 | -3.56854000  | 2.05504900   | 5.74069700  |
| H | -1 | -5.73147800  | -1.27545200  | 4.11736300  |
| H | -1 | -7.34023200  | -1.05325800  | 6.01253700  |
| H | -1 | -8.07605100  | 3.17809900   | 10.08276900 |
| H | -1 | -9.34286300  | -0.92918600  | 10.07843600 |
| H | -1 | -7.83812700  | -1.30145400  | 8.12099400  |
| H | -1 | 0.67534500   | -4.57135600  | -4.16947400 |
| H | -1 | -0.57746200  | -6.29284500  | -5.48924200 |

|   |    |             |              |             |
|---|----|-------------|--------------|-------------|
| H | -1 | -2.43604700 | -7.71265000  | -5.22787500 |
| H | -1 | -3.94898600 | -9.34461900  | -6.37823600 |
| H | -1 | -5.44188300 | -6.09064000  | -8.74445200 |
| H | -1 | -2.70360900 | -1.97129300  | -4.61992400 |
| H | -1 | -0.37733200 | -5.96333200  | -2.34169100 |
| H | -1 | -4.69791400 | -7.30160000  | -0.47176400 |
| H | -1 | -3.32117100 | -5.61354300  | 0.75691200  |
| H | -1 | -5.94426600 | -7.42093500  | -2.48149600 |
| H | -1 | -7.29230400 | -9.12921900  | -3.73246000 |
| H | -1 | -3.63475700 | -11.22519100 | -4.53769100 |
| H | -1 | -4.83441100 | -1.25594600  | -3.64464000 |
| H | -1 | -6.28748100 | -2.80205200  | -4.96854100 |
| H | -1 | -4.93014500 | -4.12336600  | -0.45890200 |
| H | -1 | -9.45514900 | -7.51864000  | -3.53428100 |
| H | -1 | -7.54518800 | -6.60705100  | -7.27259000 |
| H | -1 | -6.22342200 | -4.85533900  | -6.07232600 |
| H | -1 | 6.43795800  | 1.72261500   | 0.51208800  |
| H | -1 | 12.79520000 | 1.83053700   | 0.97436300  |
| H | -1 | 12.73767700 | -1.87651000  | 3.14367200  |
| H | -1 | 10.27742700 | -1.55742600  | 3.45524500  |
| H | -1 | 8.52702800  | -0.39490000  | 4.39681600  |
| H | -1 | 6.04367500  | -0.11081600  | 4.36858100  |
| H | -1 | 2.29506000  | 8.11728000   | -1.54152700 |
| H | -1 | 2.74513900  | 5.90785900   | -0.45022200 |
| H | -1 | -1.15216300 | 6.14787800   | 1.31964500  |
| H | -1 | 0.91280200  | 8.98099200   | -3.25444600 |
| H | -1 | 0.16512000  | 11.07906700  | -4.40742000 |
| H | -1 | -1.78619100 | 12.22459600  | -0.76027500 |
| N | -1 | -2.05391400 | -7.14694700  | -2.57996600 |
| N | -1 | -3.44060400 | -9.50660200  | -3.41566400 |
| N | -1 | -2.89943400 | -3.82849600  | -5.50232600 |
| N | -1 | -3.96720500 | -5.59978500  | -7.39275800 |
| N | -1 | -5.98655500 | -4.65222900  | -2.15012400 |
| N | -1 | -8.05123100 | -6.01353600  | -3.46887100 |
| N | -1 | 10.95803000 | 1.26000300   | 1.70575900  |
| N | -1 | 8.20603600  | 1.10312100   | 1.37703800  |
| N | -1 | -0.78071800 | 10.42822400  | -0.69986600 |
| N | -1 | -0.63309800 | 7.74637200   | 0.11797900  |
| N | -1 | -5.21713000 | 1.45538700   | 6.83179300  |
| N | -1 | -7.25144400 | 1.99618300   | 8.61132300  |
| N | -1 | -3.61929100 | -2.09173500  | 7.09235200  |
| N | -1 | -4.84518700 | -1.97759100  | 9.63247100  |
| N | -1 | 7.32303200  | -3.24643600  | 2.66037500  |
| N | -1 | 9.96234500  | -4.23884200  | 2.75295700  |
| N | -1 | 7.71698000  | -2.25324100  | -1.79232700 |
| N | -1 | 10.42886900 | -2.47934700  | -2.65128900 |
| N | -1 | 0.42167200  | 8.56188000   | -5.93715000 |
| N | -1 | 0.85333700  | 6.46094400   | -4.04223000 |
| N | -1 | -3.67401600 | 6.10143000   | -2.91950100 |
| N | -1 | -4.95133600 | 8.39081200   | -3.88477600 |
| H | 0  | -1.51909400 | 2.93910400   | 4.74876200  |
| H | 0  | -0.40921000 | 3.82648500   | 4.11597900  |

-----  
Sum of electronic and thermal Free Energies = -13124.531525 (Hartree/Particle).

**Table S9:** DFT-optimized geometry of  $f\text{-[Ce}^{\text{IV}}\text{-Ce}^{\text{III}}]^{2-}$  (singlet), computed at the B3LYP-D3/6-31G\* (HCNO)/MWB28 (Ce) level in water solvent using PCM.

| Atom |    | x            | y            | z           |
|------|----|--------------|--------------|-------------|
| Ce   | -1 | 1.41128600   | -2.14785900  | -0.52059700 |
| Ce   | 0  | -0.99091700  | 1.81208700   | 1.98413300  |
| Ce   | -1 | -1.73378400  | -1.65974300  | 1.56972900  |
| Ce   | -1 | 2.17831600   | 1.58457200   | -0.00018200 |
| Ce   | -1 | -1.22395100  | 0.48402700   | -1.32791700 |
| Ce   | 0  | 1.66766000   | -0.71568200  | 2.95334200  |
| O    | -1 | -4.63151500  | 13.22687300  | -4.22726000 |
| C    | -1 | -4.14075200  | 10.87924100  | -2.63114100 |
| C    | -1 | -3.87734200  | 9.67518600   | -1.98755900 |
| O    | -1 | -5.99760600  | -9.82993300  | -7.85991000 |
| C    | -1 | -3.94927200  | -8.21500900  | -6.70662100 |
| C    | -1 | -3.09519700  | -7.31787200  | -6.07879900 |
| O    | -1 | 14.15464300  | -3.97181500  | 0.45432800  |
| C    | -1 | 11.31914100  | -4.17259200  | 0.30028300  |
| C    | -1 | 9.93237600   | -4.12473500  | 0.32986900  |
| O    | -1 | 14.82512700  | 0.48168700   | 0.72978300  |
| C    | -1 | 12.26576100  | 1.04388400   | 1.57205900  |
| O    | -1 | -6.88112900  | 0.93617000   | 12.80109600 |
| C    | -1 | -4.81411900  | 0.46794600   | 10.88898700 |
| C    | -1 | -3.92472800  | 0.17730600   | 9.86192200  |
| O    | -1 | -9.15569000  | -8.53640500  | -7.39407900 |
| C    | -1 | -7.70080400  | -6.33803700  | -6.24165200 |
| C    | -1 | -6.97769800  | -5.36384200  | -5.56418900 |
| C    | -1 | -2.22902800  | 9.45138100   | -6.08743700 |
| C    | -1 | -1.92341600  | 8.23974600   | -5.48314100 |
| O    | -1 | -2.33974700  | 13.68184000  | -2.50869600 |
| C    | -1 | -1.16070200  | 11.55887700  | -1.19796700 |
| C    | -1 | 12.22236700  | -0.74531800  | -1.35073100 |
| C    | -1 | 10.85473900  | -0.50904700  | -1.28883100 |
| O    | -1 | -7.59949600  | -11.12429200 | -5.23779700 |
| C    | -1 | -6.23704200  | -9.16318500  | -3.68264800 |
| C    | -1 | -5.48663300  | -8.23619000  | -2.97167700 |
| O    | -1 | -10.04769300 | 0.39600800   | 12.21270700 |
| C    | -1 | -8.76804600  | -0.17198500  | 9.68095000  |
| C    | -1 | -7.93444800  | -0.36311900  | 8.58593200  |
| O    | -1 | 14.45000400  | -3.27238000  | -2.74144900 |
| C    | -1 | 11.73994900  | -2.67256000  | -2.69737900 |
| O    | -1 | -5.64354300  | -12.17261200 | -5.64873700 |
| C    | -1 | -4.19607400  | -10.33632400 | -4.14972400 |
| O    | -1 | -9.83313200  | 2.59780000   | 11.78612500 |
| C    | -1 | -8.05164000  | 2.11989600   | 9.70815200  |
| O    | -1 | -1.31496800  | 13.19175900  | -4.46149700 |
| C    | -1 | -0.05844800  | 10.93780800  | -3.23769800 |
| C    | -1 | 0.36980300   | 9.78113700   | -2.59959000 |
| O    | -1 | 15.00772500  | -1.32752000  | 2.06646000  |
| C    | -1 | 12.23097400  | -1.03104100  | 2.77700900  |
| C    | -1 | 10.86666000  | -0.83936300  | 2.96335000  |
| C    | -1 | 0.12466300   | 9.79317500   | -6.40809200 |
| O    | -1 | -10.09552500 | -8.95289800  | -5.38974700 |
| C    | -1 | -8.75932700  | -6.87455900  | -4.15558300 |
| O    | -1 | -7.66532100  | -1.15378200  | 12.47547300 |
| C    | -1 | -5.68513600  | -1.75616000  | 10.64207500 |
| O    | -1 | 14.04164200  | -4.03351700  | 2.70932600  |
| C    | -1 | 11.28572300  | -4.31346100  | 2.69597600  |
| O    | -1 | -5.52969400  | 11.92972500  | -5.83496400 |
| C    | -1 | -5.18743600  | 9.61226900   | -4.38039500 |
| O    | -1 | -6.75712200  | -8.04538900  | -9.01846900 |



|   |    |             |             |             |
|---|----|-------------|-------------|-------------|
| C | -1 | -4.79274800 | -6.38229600 | -8.00591500 |
| O | -1 | 0.18251600  | -4.25628500 | -0.51411800 |
| C | -1 | -1.34478000 | -6.20916600 | -1.93514500 |
| O | -1 | -2.84062400 | 1.32859800  | 3.47492200  |
| C | -1 | -4.38788500 | 1.31511900  | 5.83556900  |
| O | -1 | 0.09042300  | 4.07419300  | 1.95041300  |
| C | -1 | 1.81775900  | 6.44395500  | -0.20782400 |
| C | -1 | 1.56351600  | 7.67128500  | -0.80628800 |
| O | -1 | 3.59709600  | -1.61036100 | -1.47477100 |
| C | -1 | 6.39573700  | -2.02634000 | -1.69187700 |
| O | -1 | -3.47587600 | -0.78918300 | 3.04066900  |
| C | -1 | -5.59433300 | -0.53693000 | 4.90751100  |
| C | -1 | -6.47865300 | -0.42632100 | 5.97356900  |
| O | -1 | 2.01283000  | 3.83466200  | 0.80184300  |
| C | -1 | -0.36258400 | 6.58172500  | 0.78431300  |
| O | -1 | 3.92560600  | 0.61108000  | -1.30774400 |
| C | -1 | 6.64027700  | 0.35249800  | -1.86349100 |
| C | -1 | 8.01077500  | 0.15213600  | -1.95821100 |
| O | -1 | -1.52697000 | -3.96995000 | 0.92510000  |
| C | -1 | -2.99081200 | -6.01980600 | -0.20232800 |
| C | -1 | -3.75608300 | -6.94430700 | -0.89833500 |
| O | -1 | -0.84191600 | -0.94474300 | -3.27128300 |
| C | -1 | -2.22232000 | -2.85830600 | -4.79932800 |
| O | -1 | 3.24215500  | -2.51289600 | 2.76197400  |
| C | -1 | 6.00130500  | -3.05341200 | 2.69134400  |
| O | -1 | -2.59267400 | 2.46873700  | -1.27223500 |
| C | -1 | -3.33020000 | 4.97064500  | -2.30854600 |
| O | -1 | -2.51659200 | 3.30442700  | 0.81820600  |
| C | -1 | -3.57769000 | 5.76072000  | -0.06006500 |
| C | -1 | -3.93001800 | 6.99690400  | -0.58965700 |
| O | -1 | 0.78144700  | -2.43481400 | -2.80484200 |
| C | -1 | -0.33287500 | -4.31650000 | -4.55443700 |
| C | -1 | -1.03583100 | -5.26321200 | -5.28869900 |
| O | -1 | 2.97998400  | -3.44792300 | 0.72791000  |
| C | -1 | 5.61806400  | -4.36231800 | 0.71558600  |
| C | -1 | 6.98534300  | -4.59793400 | 0.67125400  |
| O | -1 | -3.57075600 | -2.10184700 | 0.05278700  |
| C | -1 | -5.22811800 | -3.77152300 | -1.46019000 |
| O | -1 | 1.72782000  | 2.87325000  | -2.03840700 |
| C | -1 | 1.15134500  | 5.34895800  | -3.35941300 |
| O | -1 | 4.12537400  | 1.67094100  | 1.40364200  |
| C | -1 | 6.65436800  | 0.19339600  | 3.56744200  |
| C | -1 | 8.03498700  | 0.02827900  | 3.57419800  |
| O | -1 | -1.37509400 | -2.76241600 | 3.71406800  |
| C | -1 | -2.85008800 | -2.40408200 | 6.05143200  |
| O | -1 | -3.29929000 | -0.69920800 | -1.68841300 |
| C | -1 | -5.16434100 | -2.15091300 | -3.22456000 |
| C | -1 | -5.96652700 | -3.00880300 | -3.96816900 |
| O | -1 | 0.51593800  | -2.01057200 | 4.68443400  |
| C | -1 | -0.94862700 | -1.30992200 | 7.01415000  |
| C | -1 | -1.75071900 | -0.98728400 | 8.10254200  |
| O | -1 | 3.85094400  | 0.33933100  | 3.19977900  |
| C | -1 | 6.88451700  | 1.24402000  | 1.42466800  |
| O | -1 | -0.17405400 | 1.99898200  | -2.87336400 |
| C | -1 | -0.71353600 | 4.23685200  | -4.37573700 |
| C | -1 | -1.02680600 | 5.43711100  | -4.99639100 |
| O | -1 | 2.13052400  | -0.49734300 | 0.86288700  |
| O | -1 | 0.01036900  | 1.79498200  | 0.05846600  |
| O | -1 | -0.45785200 | -0.19186900 | 2.71319500  |
| O | -1 | -0.66994600 | -1.48279800 | -0.39914900 |

|   |    |             |              |             |
|---|----|-------------|--------------|-------------|
| O | -1 | 0.59396700  | -2.42238800  | 1.74214800  |
| O | -1 | 1.19507000  | 0.02245400   | -1.52878300 |
| O | -1 | 1.40548100  | 1.57701500   | 2.35977400  |
| O | -1 | -2.08229600 | 0.39736500   | 0.75291900  |
| C | -1 | -4.96524000 | 12.12438300  | -4.62936600 |
| C | -1 | -4.78973400 | 10.85856700  | -3.86924400 |
| C | -1 | -4.27514100 | 8.47661300   | -2.60046800 |
| C | -1 | -5.89243300 | -8.66046400  | -8.18497800 |
| C | -1 | -4.84404000 | -7.74328900  | -7.67035800 |
| C | -1 | -3.15690400 | -5.96355500  | -6.44689000 |
| C | -1 | 13.50017000 | -4.09028900  | 1.47490500  |
| C | -1 | 12.02294900 | -4.23829900  | 1.50453300  |
| C | -1 | 9.28632800  | -4.15454500  | 1.57625300  |
| C | -1 | 14.35660400 | -0.38455100  | 1.65089500  |
| C | -1 | 12.94999700 | -0.09313500  | 2.03211700  |
| C | -1 | 10.25736400 | 0.29521800   | 2.40638400  |
| C | -1 | -6.77615400 | -0.16227600  | 12.28094300 |
| C | -1 | -5.72339000 | -0.51304500  | 11.29296100 |
| C | -1 | -3.98236500 | -1.08584800  | 9.25310300  |
| C | -1 | -9.29493700 | -8.25459900  | -6.21485900 |
| C | -1 | -8.60121900 | -7.13333200  | -5.52739100 |
| C | -1 | -7.17053700 | -5.21185700  | -4.18288300 |
| C | -1 | -1.19058900 | 10.25873000  | -6.55720200 |
| C | -1 | -0.57476600 | 7.86397600   | -5.37403300 |
| C | -1 | -1.49406600 | 12.96489600  | -3.27809200 |
| C | -1 | -0.86702100 | 11.83930800  | -2.54038900 |
| C | -1 | -0.02442400 | 9.56389300   | -1.26940700 |
| C | -1 | 12.68744200 | -1.85636400  | -2.05863200 |
| C | -1 | 9.98446800  | -1.38988100  | -1.95085300 |
| C | -1 | -6.39149100 | -11.19663700 | -5.09838400 |
| C | -1 | -5.58761500 | -10.23814700 | -4.29573600 |
| C | -1 | -4.09595600 | -8.41945300  | -2.88695900 |
| C | -1 | -9.62344500 | 1.29986200   | 11.50759500 |
| C | -1 | -8.82830500 | 1.09548500   | 10.27034300 |
| C | -1 | -7.18026200 | 0.71997300   | 8.10437900  |
| C | -1 | -0.96603400 | -4.54526600  | -0.05886500 |
| C | -1 | -1.76049800 | -5.62015800  | -0.73394900 |
| C | -1 | -3.26922600 | -7.45181000  | -2.11254700 |
| C | -1 | -3.54808400 | 0.29186400   | 3.69011800  |
| C | -1 | -4.52878700 | 0.36014400   | 4.81781000  |
| C | -1 | -6.25391500 | 0.56092200   | 6.94593400  |
| C | -1 | 0.98918500  | 4.50143800   | 1.17006200  |
| C | -1 | 0.82758100  | 5.86781900   | 0.59281700  |
| C | -1 | 0.32353000  | 8.29008400   | -0.58401400 |
| C | -1 | 4.33244100  | -0.57895400  | -1.49134000 |
| C | -1 | 5.80325300  | -0.75607600  | -1.70546000 |
| C | -1 | 8.51281700  | -1.15716700  | -1.89681400 |
| C | -1 | -0.28670700 | -2.07482200  | -3.40053100 |
| C | -1 | -0.93962100 | -3.08679500  | -4.28249500 |
| C | -1 | -2.33244300 | -4.95351000  | -5.72929300 |
| C | -1 | 3.67113100  | -3.15390700  | 1.75214100  |
| C | -1 | 5.10730900  | -3.55363800  | 1.73493600  |
| C | -1 | 7.80667500  | -4.00998200  | 1.64634600  |
| C | -1 | -2.76435100 | 3.39555300   | -0.42418300 |
| C | -1 | -3.25136700 | 4.71812700   | -0.93155900 |
| C | -1 | -3.94628000 | 7.15988700   | -1.98351000 |
| C | -1 | -3.81881200 | -1.71286900  | -1.12942500 |
| C | -1 | -4.76609100 | -2.53887500  | -1.94246600 |
| C | -1 | -6.35263700 | -4.23650100  | -3.40773800 |
| C | -1 | 0.68273300  | 2.92911400   | -2.75524700 |

|   |    |              |              |             |
|---|----|--------------|--------------|-------------|
| C | -1 | 0.38949000   | 4.18375200   | -3.51895200 |
| C | -1 | -0.22402100  | 6.55958100   | -4.74567500 |
| C | -1 | 4.56942400   | 0.95365900   | 2.35347400  |
| C | -1 | 6.05288900   | 0.80683300   | 2.46553400  |
| C | -1 | 8.78011900   | 0.48299500   | 2.47468600  |
| C | -1 | -0.72935600  | -2.29702800  | 4.69786900  |
| C | -1 | -1.50428100  | -2.01854500  | 5.94644700  |
| C | -1 | -3.08751200  | -1.41359000  | 8.10897200  |
| H | -1 | 1.47596800   | 0.08429400   | -2.45602500 |
| H | -1 | 1.85069500   | 2.32384300   | 2.78939600  |
| H | -1 | 0.63154200   | -3.32776500  | 2.09052300  |
| C | -1 | 14.14606500  | -2.14718200  | -2.06612800 |
| O | -1 | 14.98764300  | -1.45163600  | -1.52453100 |
| H | -1 | 15.41498600  | -3.40228900  | -2.67082000 |
| H | -1 | -7.55814400  | -8.60315400  | -9.08055600 |
| H | -1 | -6.24217300  | -12.73424700 | -6.17694000 |
| H | -1 | -10.44736500 | -9.71123000  | -5.89404600 |
| H | -1 | 15.65027000  | 0.10922400   | 0.36354900  |
| H | -1 | -2.91914500  | 14.19293400  | -3.10782200 |
| C | -1 | -1.52881800  | 11.57709100  | -7.15456500 |
| O | -1 | -2.66575000  | 11.99775100  | -7.27502700 |
| O | -1 | -0.44292800  | 12.25871300  | -7.56878300 |
| H | -1 | -0.75385600  | 13.11601200  | -7.91685100 |
| H | -1 | -5.53560600  | 12.78910300  | -6.29827200 |
| H | -1 | -10.32130900 | 2.64448200   | 12.63120100 |
| H | -1 | -8.46402500  | -0.76352800  | 12.88981000 |
| H | -1 | 14.94796500  | -3.68162300  | 2.61445100  |
| H | -1 | 0.09402500   | -1.02226100  | 6.98694900  |
| H | -1 | -1.34165200  | -0.44204000  | 8.94603900  |
| H | -1 | -3.31041400  | -2.94990400  | 5.23365000  |
| H | -1 | -3.23209100  | 0.93068000   | 9.50490700  |
| H | -1 | -4.83523100  | 1.44525400   | 11.35922700 |
| H | -1 | -6.37157800  | -2.54457900  | 10.93677300 |
| H | -1 | 5.62429100   | -2.43177100  | 3.49739500  |
| H | -1 | 7.41269000   | -5.22159600  | -0.10558400 |
| H | -1 | 4.94848400   | -4.77804900  | -0.02952100 |
| H | -1 | 11.79849200  | -4.39165800  | 3.65075500  |
| H | -1 | 11.86768500  | -4.11843200  | -0.63114900 |
| H | -1 | 9.36506300   | -3.99107000  | -0.58452800 |
| H | -1 | 5.76835800   | -2.90486800  | -1.58026200 |
| H | -1 | 12.06435500  | -3.54069500  | -3.26467100 |
| H | -1 | 12.93387900  | -0.09813400  | -0.85241700 |
| H | -1 | 10.46184900  | 0.31726200   | -0.70672800 |
| H | -1 | 8.68247700   | 0.99339600   | -2.08445500 |
| H | -1 | 6.21306000   | 1.34828800   | -1.90215300 |
| H | -1 | 2.01778100   | 5.33331800   | -2.70651100 |
| H | -1 | 0.95806100   | 10.39085100  | -6.76742300 |
| H | -1 | -3.25141400  | 9.79058600   | -6.19478400 |
| H | -1 | -2.70638400  | 7.60631900   | -5.07927900 |
| H | -1 | -1.87683100  | 5.50796500   | -5.66529000 |
| H | -1 | -1.31145300  | 3.34680900   | -4.53517800 |
| H | -1 | -3.55046400  | 5.59600000   | 1.01128600  |
| H | -1 | -4.19629100  | 7.81837200   | 0.06549500  |
| H | -1 | -3.09297800  | 4.17564400   | -3.00777100 |
| H | -1 | -5.71921700  | 9.55705900   | -5.32644500 |
| H | -1 | -3.82662500  | 11.82605300  | -2.20792100 |
| H | -1 | -3.32392500  | 9.66144500   | -1.05548900 |
| H | -1 | -3.56454000  | 2.02392900   | 5.79113400  |
| H | -1 | -5.73392100  | -1.28714600  | 4.13690600  |
| H | -1 | -7.34193000  | -1.07951900  | 6.03436400  |

|   |    |             |              |             |
|---|----|-------------|--------------|-------------|
| H | -1 | -8.06913700 | 3.11530800   | 10.14376700 |
| H | -1 | -9.34362400 | -0.98938700  | 10.10161800 |
| H | -1 | -7.83992400 | -1.34631200  | 8.14052400  |
| H | -1 | 0.66530200  | -4.51808100  | -4.18133100 |
| H | -1 | -0.59094800 | -6.22492400  | -5.51675300 |
| H | -1 | -2.45213900 | -7.64361600  | -5.26820200 |
| H | -1 | -3.96832400 | -9.26202900  | -6.43334700 |
| H | -1 | -5.45554600 | -5.98348200  | -8.76902800 |
| H | -1 | -2.70886500 | -1.90765000  | -4.60702700 |
| H | -1 | -0.38966100 | -5.92496400  | -2.36632300 |
| H | -1 | -4.71241300 | -7.27243200  | -0.50805700 |
| H | -1 | -3.33230600 | -5.59840700  | 0.73594700  |
| H | -1 | -5.95933200 | -7.37081200  | -2.51857000 |
| H | -1 | -7.31077800 | -9.06491000  | -3.78505400 |
| H | -1 | -3.65729300 | -11.16015700 | -4.61036500 |
| H | -1 | -4.83815900 | -1.19739300  | -3.62475200 |
| H | -1 | -6.29434400 | -2.72845000  | -4.96264600 |
| H | -1 | -4.93870200 | -4.09402500  | -0.46570300 |
| H | -1 | -9.47057400 | -7.45220200  | -3.57155000 |
| H | -1 | -7.55955800 | -6.50958000  | -7.30161400 |
| H | -1 | -6.23431400 | -4.77153600  | -6.08542200 |
| H | -1 | 6.44047500  | 1.72146900   | 0.55725500  |
| H | -1 | 12.79798800 | 1.81323300   | 1.01930300  |
| H | -1 | 12.73390900 | -1.91364300  | 3.15418100  |
| H | -1 | 10.27431400 | -1.59286600  | 3.46916400  |
| H | -1 | 8.52625300  | -0.43584800  | 4.42180000  |
| H | -1 | 6.04343200  | -0.14687900  | 4.39667000  |
| H | -1 | 2.30918000  | 8.14261400   | -1.43623400 |
| H | -1 | 2.75531700  | 5.92234000   | -0.36553300 |
| H | -1 | -1.14122300 | 6.15322400   | 1.40722100  |
| H | -1 | 0.92824500  | 9.02474000   | -3.14081400 |
| H | -1 | 0.18428600  | 11.13480200  | -4.27415600 |
| H | -1 | -1.76425200 | 12.25012800  | -0.61618300 |
| N | -1 | -2.06849300 | -7.10318800  | -2.61523700 |
| N | -1 | -3.45973500 | -9.45240300  | -3.47250100 |
| N | -1 | -2.90831400 | -3.75622700  | -5.50656400 |
| N | -1 | -3.97971900 | -5.50792600  | -7.41312300 |
| N | -1 | -5.99639100 | -4.60522200  | -2.16155100 |
| N | -1 | -8.06383400 | -5.95039200  | -3.49246400 |
| N | -1 | 10.95988000 | 1.23937700   | 1.74573100  |
| N | -1 | 8.20754100  | 1.09068700   | 1.41609200  |
| N | -1 | -0.76212800 | 10.45140000  | -0.57261200 |
| N | -1 | -0.61938000 | 7.76181300   | 0.22032100  |
| N | -1 | -5.21403100 | 1.41749200   | 6.87639800  |
| N | -1 | -7.24699500 | 1.94553900   | 8.66127600  |
| N | -1 | -3.62275000 | -2.13490300  | 7.10380300  |
| N | -1 | -4.84799200 | -2.04201200  | 9.64510400  |
| N | -1 | 7.31663100  | -3.26891900  | 2.65924000  |
| N | -1 | 9.95409900  | -4.26706500  | 2.74212200  |
| N | -1 | 7.71166700  | -2.23524300  | -1.78414200 |
| N | -1 | 10.42297900 | -2.45844500  | -2.64567700 |
| N | -1 | 0.43586900  | 8.63142300   | -5.82719300 |
| N | -1 | 0.86393300  | 6.51221500   | -3.95190300 |
| N | -1 | -3.66388900 | 6.15077000   | -2.83169400 |
| N | -1 | -4.93709400 | 8.45137800   | -3.77547200 |

---

Sum of electronic and thermal Free Energies = -13048.202180 (Hartree/Particle).

**Table S10:** DFT-optimized geometry of  $\mathbf{f-[Ce^{IV}(CO_2)-Ce^{III}]^{2-}}$  (singlet), computed at the B3LYP-D3/ 6-31G\* (HCNO)/ MWB28 (Ce) level in water solvent using PCM.

| Atom |    | x            | y            | z           |
|------|----|--------------|--------------|-------------|
| Ce   | -1 | 1.38811600   | -2.19317400  | -0.55059900 |
| Ce   | 0  | -0.98494500  | 1.82759600   | 1.88254200  |
| Ce   | -1 | -1.74588000  | -1.64740800  | 1.54226900  |
| Ce   | -1 | 2.17599600   | 1.54515200   | -0.10810700 |
| Ce   | -1 | -1.23735000  | 0.43544600   | -1.39986800 |
| Ce   | 0  | 1.66453200   | -0.69413000  | 2.89087700  |
| O    | -1 | -4.59325800  | 13.13475900  | -4.54011400 |
| C    | -1 | -4.10762200  | 10.81707700  | -2.89928200 |
| C    | -1 | -3.84756500  | 9.62482200   | -2.23277700 |
| O    | -1 | -6.08920600  | -9.98290300  | -7.70469500 |
| C    | -1 | -4.02811000  | -8.35562000  | -6.59223500 |
| C    | -1 | -3.16699400  | -7.45043800  | -5.98595000 |
| O    | -1 | 14.12610400  | -4.06174600  | 0.40938800  |
| C    | -1 | 11.28902600  | -4.25120000  | 0.27080600  |
| C    | -1 | 9.90265000   | -4.19573700  | 0.30500700  |
| O    | -1 | 14.81990500  | 0.39292300   | 0.59288700  |
| C    | -1 | 12.26686700  | 0.98481700   | 1.43402500  |
| O    | -1 | -6.83384900  | 1.19878700   | 12.73991500 |
| C    | -1 | -4.77710100  | 0.68193500   | 10.82926600 |
| C    | -1 | -3.89341300  | 0.36630100   | 9.80465800  |
| O    | -1 | -9.23885700  | -8.66433300  | -7.25216400 |
| C    | -1 | -7.76829200  | -6.45074300  | -6.14986300 |
| C    | -1 | -7.03755300  | -5.46686400  | -5.49496300 |
| C    | -1 | -2.21730900  | 9.31068200   | -6.33394900 |
| C    | -1 | -1.91525000  | 8.10984800   | -5.70674100 |
| O    | -1 | -2.29218400  | 13.61240700  | -2.84024300 |
| C    | -1 | -1.11833700  | 11.51015100  | -1.49201000 |
| C    | -1 | 12.20250300  | -0.86226500  | -1.45214400 |
| C    | -1 | 10.83633800  | -0.61788000  | -1.38948700 |
| O    | -1 | -7.68669900  | -11.21640600 | -5.05076000 |
| C    | -1 | -6.30808700  | -9.23150100  | -3.54069800 |
| C    | -1 | -5.55014200  | -8.29427800  | -2.85146100 |
| O    | -1 | -10.00546600 | 0.66300500   | 12.17520800 |
| C    | -1 | -8.73911600  | 0.03799500   | 9.65020700  |
| C    | -1 | -7.91100500  | -0.17923100  | 8.55589200  |
| O    | -1 | 14.41176500  | -3.42789900  | -2.80091900 |
| C    | -1 | 11.70493800  | -2.81359800  | -2.75796900 |
| O    | -1 | -5.73770500  | -12.28263100 | -5.44848700 |
| C    | -1 | -4.27493400  | -10.42407300 | -3.99239100 |
| O    | -1 | -9.78169600  | 2.85470700   | 11.70375100 |
| C    | -1 | -8.01119200  | 2.32630400   | 9.62861600  |
| O    | -1 | -1.27792200  | 13.07816700  | -4.78694400 |
| C    | -1 | -0.02761500  | 10.84281800  | -3.52331100 |
| C    | -1 | 0.39749500   | 9.69699200   | -2.86389200 |
| O    | -1 | 14.99899500  | -1.39007700  | 1.96478800  |
| C    | -1 | 12.22670900  | -1.06538000  | 2.68042200  |
| C    | -1 | 10.86414900  | -0.86310300  | 2.86837500  |
| C    | -1 | 0.13671400   | 9.63406600   | -6.67085300 |
| O    | -1 | -10.17248100 | -9.03587100  | -5.23612700 |
| C    | -1 | -8.82086400  | -6.94005000  | -4.04922400 |
| O    | -1 | -7.62978300  | -0.89326300  | 12.45937600 |
| C    | -1 | -5.66020200  | -1.54222700  | 10.63045700 |
| O    | -1 | 14.02209900  | -4.07774100  | 2.66560700  |

|   |    |             |             |             |
|---|----|-------------|-------------|-------------|
| C | -1 | 11.26478600 | -4.34393400 | 2.66895500  |
| O | -1 | -5.50451400 | 11.81026800 | -6.11788900 |
| C | -1 | -5.16781300 | 9.52067600  | -4.61858200 |
| O | -1 | -6.84459100 | -8.21807200 | -8.89570000 |
| C | -1 | -4.86779400 | -6.54502400 | -7.92457300 |
| O | -1 | 0.14884900  | -4.29475700 | -0.49694100 |
| C | -1 | -1.39399900 | -6.26792500 | -1.87241000 |
| O | -1 | -2.82990200 | 1.38419700  | 3.39158600  |
| C | -1 | -4.36749500 | 1.42565400  | 5.75821900  |
| O | -1 | 0.10844600  | 4.08372000  | 1.80059300  |
| C | -1 | 1.83865400  | 6.40104400  | -0.41160800 |
| C | -1 | 1.58806500  | 7.61742600  | -1.03350700 |
| O | -1 | 3.57258900  | -1.68591100 | -1.52412900 |
| C | -1 | 6.36820500  | -2.12032800 | -1.74411700 |
| O | -1 | -3.47750200 | -0.73875600 | 3.00240400  |
| C | -1 | -5.58697500 | -0.43845800 | 4.87230400  |
| C | -1 | -6.46632900 | -0.30206300 | 5.93948300  |
| O | -1 | 2.02486300  | 3.81152300  | 0.64931900  |
| C | -1 | -0.33686500 | 6.56968000  | 0.58633500  |
| O | -1 | 3.91285800  | 0.53672300  | -1.40294200 |
| C | -1 | 6.62388700  | 0.25333000  | -1.96432500 |
| C | -1 | 7.99296600  | 0.04417400  | -2.06052700 |
| O | -1 | -1.55324000 | -3.97103100 | 0.94311300  |
| C | -1 | -3.03190600 | -6.03559600 | -0.13712500 |
| C | -1 | -3.80463900 | -6.96995000 | -0.81139000 |
| O | -1 | -0.87043400 | -1.03390200 | -3.31574000 |
| C | -1 | -2.26654600 | -2.97064400 | -4.79958100 |
| O | -1 | 3.23052300  | -2.50150800 | 2.73091400  |
| C | -1 | 5.98674000  | -3.05748000 | 2.66034700  |
| O | -1 | -2.59588900 | 2.42771400  | -1.37842500 |
| C | -1 | -3.32520300 | 4.91208900  | -2.46167000 |
| O | -1 | -2.50690100 | 3.30454700  | 0.69456200  |
| C | -1 | -3.55947800 | 5.74824000  | -0.22848700 |
| C | -1 | -3.90782200 | 6.97534800  | -0.78131000 |
| O | -1 | 0.74740000  | -2.52253900 | -2.82607800 |
| C | -1 | -0.38348500 | -4.43319700 | -4.53313500 |
| C | -1 | -1.09417200 | -5.39083800 | -5.24545400 |
| O | -1 | 2.95542000  | -3.47588000 | 0.71737500  |
| C | -1 | 5.58883500  | -4.40369900 | 0.71276000  |
| C | -1 | 6.95472900  | -4.64707800 | 0.66765500  |
| O | -1 | -3.59127800 | -2.11043000 | 0.04181600  |
| C | -1 | -5.26314800 | -3.80162900 | -1.43075400 |
| O | -1 | 1.72337300  | 2.79492700  | -2.16992800 |
| C | -1 | 1.15379900  | 5.24659600  | -3.53792600 |
| O | -1 | 4.12907600  | 1.64959100  | 1.28583600  |
| C | -1 | 6.65958200  | 0.20285800  | 3.46860400  |
| C | -1 | 8.03937800  | 0.03091900  | 3.47311100  |
| O | -1 | -1.38384500 | -2.70870400 | 3.70670300  |
| C | -1 | -2.84737400 | -2.29622400 | 6.04234300  |
| O | -1 | -3.31998600 | -0.74431500 | -1.72821800 |
| C | -1 | -5.19857400 | -2.21699000 | -3.22747200 |
| C | -1 | -6.00808500 | -3.08551400 | -3.95051600 |
| O | -1 | 0.51508500  | -1.94707400 | 4.65414800  |
| C | -1 | -0.93653100 | -1.19266600 | 6.97529400  |
| C | -1 | -1.73251000 | -0.84425500 | 8.06022500  |
| O | -1 | 3.85512000  | 0.35582100  | 3.10969400  |
| C | -1 | 6.88612500  | 1.20921800  | 1.30430800  |
| O | -1 | -0.18625800 | 1.91377400  | -2.97954400 |
| C | -1 | -0.72077600 | 4.12383700  | -4.52426100 |
| C | -1 | -1.03061700 | 5.31300800  | -5.16756500 |

|   |    |             |              |             |
|---|----|-------------|--------------|-------------|
| O | -1 | 2.12109400  | -0.51914100  | 0.79662100  |
| O | -1 | 0.00913200  | 1.76767600   | -0.04511600 |
| O | -1 | -0.45779900 | -0.16353100  | 2.65085000  |
| O | -1 | -0.68930300 | -1.51524200  | -0.43412800 |
| O | -1 | 0.57888200  | -2.41834200  | 1.72047700  |
| O | -1 | 1.17854100  | -0.04236600  | -1.60117400 |
| O | -1 | 1.41289300  | 1.58859200   | 2.25458000  |
| O | -1 | -2.08747300 | 0.39462200   | 0.68576800  |
| C | -1 | -4.93413000 | 12.02614800  | -4.91871200 |
| C | -1 | -4.76180100 | 10.77492200  | -4.13410100 |
| C | -1 | -4.25385600 | 8.41625600   | -2.81995200 |
| C | -1 | -5.97954800 | -8.82071900  | -8.05354400 |
| C | -1 | -4.92448400 | -7.89875300  | -7.56161900 |
| C | -1 | -3.22346800 | -6.10346300  | -6.38084200 |
| C | -1 | 13.47526400 | -4.15645800  | 1.43475900  |
| C | -1 | 11.99745800 | -4.29636200  | 1.47328900  |
| C | -1 | 9.26160800  | -4.19733000  | 1.55432700  |
| C | -1 | 14.35087300 | -0.45232600  | 1.53304200  |
| C | -1 | 12.94731900 | -0.14621900  | 1.91400800  |
| C | -1 | 10.25822200 | 0.26317800   | 2.29125200  |
| C | -1 | -6.73649500 | 0.08963600   | 12.24144800 |
| C | -1 | -5.68957600 | -0.28615900  | 11.25646300 |
| C | -1 | -3.95985400 | -0.90847400  | 9.22149900  |
| C | -1 | -9.37183300 | -8.35828700  | -6.07827500 |
| C | -1 | -8.66970600 | -7.22701700  | -5.41619900 |
| C | -1 | -7.22393400 | -5.28629500  | -4.11621400 |
| C | -1 | -1.17680600 | 10.10319900  | -6.82396500 |
| C | -1 | -0.56805100 | 7.72951100   | -5.59555500 |
| C | -1 | -1.45326600 | 12.87593700  | -3.59852100 |
| C | -1 | -0.82880100 | 11.76217400  | -2.84095000 |
| C | -1 | 0.00768000  | 9.50840700   | -1.52804800 |
| C | -1 | 12.65911200 | -1.98959500  | -2.13951500 |
| C | -1 | 9.95896500  | -1.50736400  | -2.03022600 |
| C | -1 | -6.47850500 | -11.29206500 | -4.91478700 |
| C | -1 | -5.66655800 | -10.32179100 | -4.13473900 |
| C | -1 | -4.16005700 | -8.48285100  | -2.76868500 |
| C | -1 | -9.57963000 | 1.55041000   | 11.45043300 |
| C | -1 | -8.79062700 | 1.31729300   | 10.21433300 |
| C | -1 | -7.15342300 | 0.89017500   | 8.04971100  |
| C | -1 | -0.99923000 | -4.56875600  | -0.03137300 |
| C | -1 | -1.80181900 | -5.65290200  | -0.68159000 |
| C | -1 | -3.32532900 | -7.50410600  | -2.01714300 |
| C | -1 | -3.54172400 | 0.35546600   | 3.63027400  |
| C | -1 | -4.51739000 | 0.45125200   | 4.76033100  |
| C | -1 | -6.23266500 | 0.70328800   | 6.89096600  |
| C | -1 | 1.00610000  | 4.49070800   | 1.00823200  |
| C | -1 | 0.84892800  | 5.84606600   | 0.40438800  |
| C | -1 | 0.35210500  | 8.24682100   | -0.81868500 |
| C | -1 | 4.31299200  | -0.65878800  | -1.56431000 |
| C | -1 | 5.78200800  | -0.84760600  | -1.78075500 |
| C | -1 | 8.48872700  | -1.26616400  | -1.97493900 |
| C | -1 | -0.32138800 | -2.16914100  | -3.42455600 |
| C | -1 | -0.98296800 | -3.19523800  | -4.28344000 |
| C | -1 | -2.39103100 | -5.08345000  | -5.68694200 |
| C | -1 | 3.65226400  | -3.16502300  | 1.73279200  |
| C | -1 | 5.08632800  | -3.57220000  | 1.71775200  |
| C | -1 | 7.78299500  | -4.04390100  | 1.62746400  |
| C | -1 | -2.75945600 | 3.37217200   | -0.54842600 |
| C | -1 | -3.24196100 | 4.68677400   | -1.08022700 |
| C | -1 | -3.92902000 | 7.11048900   | -2.17807200 |

|   |    |              |              |             |
|---|----|--------------|--------------|-------------|
| C | -1 | -3.84224800  | -1.74393300  | -1.14696200 |
| C | -1 | -4.79697700  | -2.58123400  | -1.93947700 |
| C | -1 | -6.39799400  | -4.29978100  | -3.36405700 |
| C | -1 | 0.67563000   | 2.84172900   | -2.88353300 |
| C | -1 | 0.38549600   | 4.08230500   | -3.67102900 |
| C | -1 | -0.22122200  | 6.43619100   | -4.94261400 |
| C | -1 | 4.57356100   | 0.94910100   | 2.24804200  |
| C | -1 | 6.05662700   | 0.79711900   | 2.35702600  |
| C | -1 | 8.78222600   | 0.45976400   | 2.36172200  |
| C | -1 | -0.73172200  | -2.22708000  | 4.67836500  |
| C | -1 | -1.50010400  | -1.91970000  | 5.92424900  |
| C | -1 | -3.07137200  | -1.26357100  | 8.08057000  |
| H | -1 | 1.45590500   | -0.00051500  | -2.53058500 |
| H | -1 | 1.86330600   | 2.34164700   | 2.66744100  |
| H | -1 | 0.61313600   | -3.31657300  | 2.08682400  |
| C | -1 | 14.11622500  | -2.28788800  | -2.14705300 |
| O | -1 | 14.96348500  | -1.58591700  | -1.62288800 |
| H | -1 | 15.37637000  | -3.56125500  | -2.73158600 |
| H | -1 | -7.64863200  | -8.77290400  | -8.94338000 |
| H | -1 | -6.34130000  | -12.85168300 | -5.96292200 |
| H | -1 | -10.53017300 | -9.80235100  | -5.72371600 |
| H | -1 | 15.64166400  | 0.00903300   | 0.23086900  |
| H | -1 | -2.87149300  | 14.11433900  | -3.44714900 |
| C | -1 | -1.51092100  | 11.41104000  | -7.44624800 |
| O | -1 | -2.64623000  | 11.83495900  | -7.57053700 |
| O | -1 | -0.42336500  | 12.07872800  | -7.87840100 |
| H | -1 | -0.73145000  | 12.93045500  | -8.24231700 |
| H | -1 | -5.50805400  | 12.66022300  | -6.59828900 |
| H | -1 | -10.26614400 | 2.92076000   | 12.54968000 |
| H | -1 | -8.42481700  | -0.49075600  | 12.86902300 |
| H | -1 | 14.92976500  | -3.73241100  | 2.56005700  |
| H | -1 | 0.10742100   | -0.91089100  | 6.93814200  |
| H | -1 | -1.31725400  | -0.28432300  | 8.89097900  |
| H | -1 | -3.31378400  | -2.85596100  | 5.23751700  |
| H | -1 | -3.19850900  | 1.10886200   | 9.42984000  |
| H | -1 | -4.79140200  | 1.66855000   | 11.27991800 |
| H | -1 | -6.34934300  | -2.32110400  | 10.94364800 |
| H | -1 | 5.61615600   | -2.41793400  | 3.45529700  |
| H | -1 | 7.37575500   | -5.28831500  | -0.09824800 |
| H | -1 | 4.91412500   | -4.83085900  | -0.02116900 |
| H | -1 | 11.78109300  | -4.40560700  | 3.62303700  |
| H | -1 | 11.83398700  | -4.21846600  | -0.66372400 |
| H | -1 | 9.33224400   | -4.07752400  | -0.60959400 |
| H | -1 | 5.73692100   | -2.99325800  | -1.61240500 |
| H | -1 | 12.02267100  | -3.69454200  | -3.30905900 |
| H | -1 | 12.91928100  | -0.20885200  | -0.96975900 |
| H | -1 | 10.44997400  | 0.22189100   | -0.82247400 |
| H | -1 | 8.66832700   | 0.87932700   | -2.20629700 |
| H | -1 | 6.20148100   | 1.25029900   | -2.02120600 |
| H | -1 | 2.02283200   | 5.23963400   | -2.88833400 |
| H | -1 | 0.97159100   | 10.22020200  | -7.04543400 |
| H | -1 | -3.23842500  | 9.65284500   | -6.44395400 |
| H | -1 | -2.69969200  | 7.48860200   | -5.28712500 |
| H | -1 | -1.88303000  | 5.37476900   | -5.83432300 |
| H | -1 | -1.32377400  | 3.23382100   | -4.66343500 |
| H | -1 | -3.52865400  | 5.60485300   | 0.84583100  |
| H | -1 | -4.16729300  | 7.81109900   | -0.14167800 |
| H | -1 | -3.09483100  | 4.10206500   | -3.14578000 |
| H | -1 | -5.70375900  | 9.44924300   | -5.56119000 |
| H | -1 | -3.78703900  | 11.77056500  | -2.49637800 |



|   |    |             |              |             |
|---|----|-------------|--------------|-------------|
| H | -1 | -3.29038400 | 9.62693100   | -1.30285300 |
| H | -1 | -3.54081900 | 2.12925400   | 5.69628400  |
| H | -1 | -5.73347700 | -1.20322700  | 4.11744800  |
| H | -1 | -7.33259300 | -0.94953300  | 6.01682200  |
| H | -1 | -8.02193100 | 3.33030900   | 10.04427300 |
| H | -1 | -9.31702100 | -0.76790100  | 10.08947500 |
| H | -1 | -7.82322000 | -1.17160500  | 8.12989000  |
| H | -1 | 0.61520600  | -4.63232500  | -4.16008600 |
| H | -1 | -0.65503200 | -6.35916200  | -5.45598900 |
| H | -1 | -2.52222900 | -7.76315200  | -5.17158500 |
| H | -1 | -4.05125300 | -9.39685300  | -6.29797000 |
| H | -1 | -5.53173800 | -6.15820600  | -8.69284700 |
| H | -1 | -2.74763800 | -2.01387700  | -4.62440300 |
| H | -1 | -0.43926200 | -5.99724900  | -2.31303300 |
| H | -1 | -4.76097400 | -7.28535300  | -0.41077400 |
| H | -1 | -3.36742400 | -5.59378400  | 0.79388800  |
| H | -1 | -6.01664900 | -7.41762500  | -2.41387900 |
| H | -1 | -7.38173200 | -9.12985600  | -3.64073000 |
| H | -1 | -3.74217000 | -11.25967700 | -4.43860200 |
| H | -1 | -4.86929600 | -1.27333200  | -3.64799200 |
| H | -1 | -6.33859900 | -2.82345700  | -4.94908100 |
| H | -1 | -4.97124500 | -4.10562800  | -0.43117900 |
| H | -1 | -9.53256600 | -7.50228100  | -3.45088200 |
| H | -1 | -7.63227600 | -6.64417300  | -7.20673700 |
| H | -1 | -6.29338200 | -4.88887800  | -6.03094200 |
| H | -1 | 6.44089400  | 1.67145900   | 0.42930000  |
| H | -1 | 12.80063700 | 1.74024600   | 0.86383300  |
| H | -1 | 12.72679200 | -1.94279400  | 3.07317100  |
| H | -1 | 10.27014600 | -1.60332500  | 3.39155900  |
| H | -1 | 8.53181600  | -0.41863800  | 4.32785500  |
| H | -1 | 6.05038400  | -0.11765800  | 4.30693200  |
| H | -1 | 2.33346500  | 8.07227300   | -1.67576300 |
| H | -1 | 2.77294300  | 5.87163600   | -0.56261000 |
| H | -1 | -1.11505300 | 6.15767800   | 1.22082900  |
| H | -1 | 0.94992400  | 8.92709900   | -3.39209900 |
| H | -1 | 0.21182200  | 11.01780200  | -4.56447400 |
| H | -1 | -1.71603100 | 12.21595300  | -0.92176400 |
| N | -1 | -2.12495600 | -7.17169900  | -2.53154200 |
| N | -1 | -3.53141200 | -9.53052000  | -3.33597500 |
| N | -1 | -2.96000500 | -3.87904900  | -5.48592400 |
| N | -1 | -4.04798000 | -5.66309700  | -7.35268800 |
| N | -1 | -6.03845200 | -4.64529200  | -2.11217900 |
| N | -1 | -8.11804600 | -6.00633400  | -3.40755300 |
| N | -1 | 10.96270400 | 1.19035800   | 1.60899900  |
| N | -1 | 8.20832200  | 1.04904500   | 1.29348100  |
| N | -1 | -0.72271200 | 10.41340300  | -0.84620700 |
| N | -1 | -0.59010000 | 7.73953200   | -0.00014300 |
| N | -1 | -5.18882100 | 1.55301600   | 6.80010400  |
| N | -1 | -7.21175000 | 2.12696100   | 8.58221300  |
| N | -1 | -3.61433900 | -2.00213100  | 7.09221200  |
| N | -1 | -4.82861200 | -1.85220700  | 9.63605200  |
| N | -1 | 7.30083200  | -3.28024600  | 2.62727500  |
| N | -1 | 9.93361300  | -4.28987900  | 2.71952000  |
| N | -1 | 7.68268500  | -2.33769800  | -1.83747400 |
| N | -1 | 10.38927600 | -2.59182400  | -2.70526700 |
| N | -1 | 0.44451900  | 8.48260800   | -6.06805800 |
| N | -1 | 0.86974700  | 6.39920600   | -4.15243600 |
| N | -1 | -3.65516100 | 6.08318600   | -3.00700300 |
| N | -1 | -4.92076700 | 8.37086800   | -3.99154000 |
| C | 0  | 0.84560600  | 2.29734900   | 5.49847500  |

|   |   |             |            |            |
|---|---|-------------|------------|------------|
| O | 0 | 1.81235900  | 2.83966500 | 5.12386100 |
| O | 0 | -0.12105300 | 1.75270700 | 5.86775500 |

Sum of electronic and thermal Free Energies = -13236.789681 (Hartree/Particle).

**Table S11:** DFT-optimized geometry of **TS<sub>1</sub>** (singlet), computed at the B3LYP-D3/ 6-31G\* (HCNO)/ MWB28 (Ce) level in water solvent using PCM.

| Atom |    | x            | y            | z           |
|------|----|--------------|--------------|-------------|
| Ce   | -1 | 1.38811600   | -2.19317400  | -0.55059900 |
| Ce   | 0  | -0.98494500  | 1.82759600   | 1.88254200  |
| Ce   | -1 | -1.74588000  | -1.64740800  | 1.54226900  |
| Ce   | -1 | 2.17599600   | 1.54515200   | -0.10810700 |
| Ce   | -1 | -1.23735000  | 0.43544600   | -1.39986800 |
| Ce   | 0  | 1.66453200   | -0.69413000  | 2.89087700  |
| O    | -1 | -4.59325800  | 13.13475900  | -4.54011400 |
| C    | -1 | -4.10762200  | 10.81707700  | -2.89928200 |
| C    | -1 | -3.84756500  | 9.62482200   | -2.23277700 |
| O    | -1 | -6.08920600  | -9.98290300  | -7.70469500 |
| C    | -1 | -4.02811000  | -8.35562000  | -6.59223500 |
| C    | -1 | -3.16699400  | -7.45043800  | -5.98595000 |
| O    | -1 | 14.12610400  | -4.06174600  | 0.40938800  |
| C    | -1 | 11.28902600  | -4.25120000  | 0.27080600  |
| C    | -1 | 9.90265000   | -4.19573700  | 0.30500700  |
| O    | -1 | 14.81990500  | 0.39292300   | 0.59288700  |
| C    | -1 | 12.26686700  | 0.98481700   | 1.43402500  |
| O    | -1 | -6.83384900  | 1.19878700   | 12.73991500 |
| C    | -1 | -4.77710100  | 0.68193500   | 10.82926600 |
| C    | -1 | -3.89341300  | 0.36630100   | 9.80465800  |
| O    | -1 | -9.23885700  | -8.66433300  | -7.25216400 |
| C    | -1 | -7.76829200  | -6.45074300  | -6.14986300 |
| C    | -1 | -7.03755300  | -5.46686400  | -5.49496300 |
| C    | -1 | -2.21730900  | 9.31068200   | -6.33394900 |
| C    | -1 | -1.91525000  | 8.10984800   | -5.70674100 |
| O    | -1 | -2.29218400  | 13.61240700  | -2.84024300 |
| C    | -1 | -1.11833700  | 11.51015100  | -1.49201000 |
| C    | -1 | 12.20250300  | -0.86226500  | -1.45214400 |
| C    | -1 | 10.83633800  | -0.61788000  | -1.38948700 |
| O    | -1 | -7.68669900  | -11.21640600 | -5.05076000 |
| C    | -1 | -6.30808700  | -9.23150100  | -3.54069800 |
| C    | -1 | -5.55014200  | -8.29427800  | -2.85146100 |
| O    | -1 | -10.00546600 | 0.66300500   | 12.17520800 |
| C    | -1 | -8.73911600  | 0.03799500   | 9.65020700  |
| C    | -1 | -7.91100500  | -0.17923100  | 8.55589200  |
| O    | -1 | 14.41176500  | -3.42789900  | -2.80091900 |
| C    | -1 | 11.70493800  | -2.81359800  | -2.75796900 |
| O    | -1 | -5.73770500  | -12.28263100 | -5.44848700 |
| C    | -1 | -4.27493400  | -10.42407300 | -3.99239100 |
| O    | -1 | -9.78169600  | 2.85470700   | 11.70375100 |
| C    | -1 | -8.01119200  | 2.32630400   | 9.62861600  |
| O    | -1 | -1.27792200  | 13.07816700  | -4.78694400 |
| C    | -1 | -0.02761500  | 10.84281800  | -3.52331100 |
| C    | -1 | 0.39749500   | 9.69699200   | -2.86389200 |
| O    | -1 | 14.99899500  | -1.39007700  | 1.96478800  |
| C    | -1 | 12.22670900  | -1.06538000  | 2.68042200  |

|   |    |              |             |             |
|---|----|--------------|-------------|-------------|
| C | -1 | 10.86414900  | -0.86310300 | 2.86837500  |
| C | -1 | 0.13671400   | 9.63406600  | -6.67085300 |
| O | -1 | -10.17248100 | -9.03587100 | -5.23612700 |
| C | -1 | -8.82086400  | -6.94005000 | -4.04922400 |
| O | -1 | -7.62978300  | -0.89326300 | 12.45937600 |
| C | -1 | -5.66020200  | -1.54222700 | 10.63045700 |
| O | -1 | 14.02209900  | -4.07774100 | 2.66560700  |
| C | -1 | 11.26478600  | -4.34393400 | 2.66895500  |
| O | -1 | -5.50451400  | 11.81026800 | -6.11788900 |
| C | -1 | -5.16781300  | 9.52067600  | -4.61858200 |
| O | -1 | -6.84459100  | -8.21807200 | -8.89570000 |
| C | -1 | -4.86779400  | -6.54502400 | -7.92457300 |
| O | -1 | 0.14884900   | -4.29475700 | -0.49694100 |
| C | -1 | -1.39399900  | -6.26792500 | -1.87241000 |
| O | -1 | -2.82990200  | 1.38419700  | 3.39158600  |
| C | -1 | -4.36749500  | 1.42565400  | 5.75821900  |
| O | -1 | 0.10844600   | 4.08372000  | 1.80059300  |
| C | -1 | 1.83865400   | 6.40104400  | -0.41160800 |
| C | -1 | 1.58806500   | 7.61742600  | -1.03350700 |
| O | -1 | 3.57258900   | -1.68591100 | -1.52412900 |
| C | -1 | 6.36820500   | -2.12032800 | -1.74411700 |
| O | -1 | -3.47750200  | -0.73875600 | 3.00240400  |
| C | -1 | -5.58697500  | -0.43845800 | 4.87230400  |
| C | -1 | -6.46632900  | -0.30206300 | 5.93948300  |
| O | -1 | 2.02486300   | 3.81152300  | 0.64931900  |
| C | -1 | -0.33686500  | 6.56968000  | 0.58633500  |
| O | -1 | 3.91285800   | 0.53672300  | -1.40294200 |
| C | -1 | 6.62388700   | 0.25333000  | -1.96432500 |
| C | -1 | 7.99296600   | 0.04417400  | -2.06052700 |
| O | -1 | -1.55324000  | -3.97103100 | 0.94311300  |
| C | -1 | -3.03190600  | -6.03559600 | -0.13712500 |
| C | -1 | -3.80463900  | -6.96995000 | -0.81139000 |
| O | -1 | -0.87043400  | -1.03390200 | -3.31574000 |
| C | -1 | -2.26654600  | -2.97064400 | -4.79958100 |
| O | -1 | 3.23052300   | -2.50150800 | 2.73091400  |
| C | -1 | 5.98674000   | -3.05748000 | 2.66034700  |
| O | -1 | -2.59588900  | 2.42771400  | -1.37842500 |
| C | -1 | -3.32520300  | 4.91208900  | -2.46167000 |
| O | -1 | -2.50690100  | 3.30454700  | 0.69456200  |
| C | -1 | -3.55947800  | 5.74824000  | -0.22848700 |
| C | -1 | -3.90782200  | 6.97534800  | -0.78131000 |
| O | -1 | 0.74740000   | -2.52253900 | -2.82607800 |
| C | -1 | -0.38348500  | -4.43319700 | -4.53313500 |
| C | -1 | -1.09417200  | -5.39083800 | -5.24545400 |
| O | -1 | 2.95542000   | -3.47588000 | 0.71737500  |
| C | -1 | 5.58883500   | -4.40369900 | 0.71276000  |
| C | -1 | 6.95472900   | -4.64707800 | 0.66765500  |
| O | -1 | -3.59127800  | -2.11043000 | 0.04181600  |
| C | -1 | -5.26314800  | -3.80162900 | -1.43075400 |
| O | -1 | 1.72337300   | 2.79492700  | -2.16992800 |
| C | -1 | 1.15379900   | 5.24659600  | -3.53792600 |
| O | -1 | 4.12907600   | 1.64959100  | 1.28583600  |
| C | -1 | 6.65958200   | 0.20285800  | 3.46860400  |
| C | -1 | 8.03937800   | 0.03091900  | 3.47311100  |
| O | -1 | -1.38384500  | -2.70870400 | 3.70670300  |
| C | -1 | -2.84737400  | -2.29622400 | 6.04234300  |
| O | -1 | -3.31998600  | -0.74431500 | -1.72821800 |
| C | -1 | -5.19857400  | -2.21699000 | -3.22747200 |
| C | -1 | -6.00808500  | -3.08551400 | -3.95051600 |
| O | -1 | 0.51508500   | -1.94707400 | 4.65414800  |

|   |    |             |              |             |
|---|----|-------------|--------------|-------------|
| C | -1 | -0.93653100 | -1.19266600  | 6.97529400  |
| C | -1 | -1.73251000 | -0.84425500  | 8.06022500  |
| O | -1 | 3.85512000  | 0.35582100   | 3.10969400  |
| C | -1 | 6.88612500  | 1.20921800   | 1.30430800  |
| O | -1 | -0.18625800 | 1.91377400   | -2.97954400 |
| C | -1 | -0.72077600 | 4.12383700   | -4.52426100 |
| C | -1 | -1.03061700 | 5.31300800   | -5.16756500 |
| O | -1 | 2.12109400  | -0.51914100  | 0.79662100  |
| O | -1 | 0.00913200  | 1.76767600   | -0.04511600 |
| O | -1 | -0.45779900 | -0.16353100  | 2.65085000  |
| O | -1 | -0.68930300 | -1.51524200  | -0.43412800 |
| O | -1 | 0.57888200  | -2.41834200  | 1.72047700  |
| O | -1 | 1.17854100  | -0.04236600  | -1.60117400 |
| O | -1 | 1.41289300  | 1.58859200   | 2.25458000  |
| O | -1 | -2.08747300 | 0.39462200   | 0.68576800  |
| C | -1 | -4.93413000 | 12.02614800  | -4.91871200 |
| C | -1 | -4.76180100 | 10.77492200  | -4.13410100 |
| C | -1 | -4.25385600 | 8.41625600   | -2.81995200 |
| C | -1 | -5.97954800 | -8.82071900  | -8.05354400 |
| C | -1 | -4.92448400 | -7.89875300  | -7.56161900 |
| C | -1 | -3.22346800 | -6.10346300  | -6.38084200 |
| C | -1 | 13.47526400 | -4.15645800  | 1.43475900  |
| C | -1 | 11.99745800 | -4.29636200  | 1.47328900  |
| C | -1 | 9.26160800  | -4.19733000  | 1.55432700  |
| C | -1 | 14.35087300 | -0.45232600  | 1.53304200  |
| C | -1 | 12.94731900 | -0.14621900  | 1.91400800  |
| C | -1 | 10.25822200 | 0.26317800   | 2.29125200  |
| C | -1 | -6.73649500 | 0.08963600   | 12.24144800 |
| C | -1 | -5.68957600 | -0.28615900  | 11.25646300 |
| C | -1 | -3.95985400 | -0.90847400  | 9.22149900  |
| C | -1 | -9.37183300 | -8.35828700  | -6.07827500 |
| C | -1 | -8.66970600 | -7.22701700  | -5.41619900 |
| C | -1 | -7.22393400 | -5.28629500  | -4.11621400 |
| C | -1 | -1.17680600 | 10.10319900  | -6.82396500 |
| C | -1 | -0.56805100 | 7.72951100   | -5.59555500 |
| C | -1 | -1.45326600 | 12.87593700  | -3.59852100 |
| C | -1 | -0.82880100 | 11.76217400  | -2.84095000 |
| C | -1 | 0.00768000  | 9.50840700   | -1.52804800 |
| C | -1 | 12.65911200 | -1.98959500  | -2.13951500 |
| C | -1 | 9.95896500  | -1.50736400  | -2.03022600 |
| C | -1 | -6.47850500 | -11.29206500 | -4.91478700 |
| C | -1 | -5.66655800 | -10.32179100 | -4.13473900 |
| C | -1 | -4.16005700 | -8.48285100  | -2.76868500 |
| C | -1 | -9.57963000 | 1.55041000   | 11.45043300 |
| C | -1 | -8.79062700 | 1.31729300   | 10.21433300 |
| C | -1 | -7.15342300 | 0.89017500   | 8.04971100  |
| C | -1 | -0.99923000 | -4.56875600  | -0.03137300 |
| C | -1 | -1.80181900 | -5.65290200  | -0.68159000 |
| C | -1 | -3.32532900 | -7.50410600  | -2.01714300 |
| C | -1 | -3.54172400 | 0.35546600   | 3.63027400  |
| C | -1 | -4.51739000 | 0.45125200   | 4.76033100  |
| C | -1 | -6.23266500 | 0.70328800   | 6.89096600  |
| C | -1 | 1.00610000  | 4.49070800   | 1.00823200  |
| C | -1 | 0.84892800  | 5.84606600   | 0.40438800  |
| C | -1 | 0.35210500  | 8.24682100   | -0.81868500 |
| C | -1 | 4.31299200  | -0.65878800  | -1.56431000 |
| C | -1 | 5.78200800  | -0.84760600  | -1.78075500 |
| C | -1 | 8.48872700  | -1.26616400  | -1.97493900 |
| C | -1 | -0.32138800 | -2.16914100  | -3.42455600 |
| C | -1 | -0.98296800 | -3.19523800  | -4.28344000 |

|   |    |              |              |             |
|---|----|--------------|--------------|-------------|
| C | -1 | -2.39103100  | -5.08345000  | -5.68694200 |
| C | -1 | 3.65226400   | -3.16502300  | 1.73279200  |
| C | -1 | 5.08632800   | -3.57220000  | 1.71775200  |
| C | -1 | 7.78299500   | -4.04390100  | 1.62746400  |
| C | -1 | -2.75945600  | 3.37217200   | -0.54842600 |
| C | -1 | -3.24196100  | 4.68677400   | -1.08022700 |
| C | -1 | -3.92902000  | 7.11048900   | -2.17807200 |
| C | -1 | -3.84224800  | -1.74393300  | -1.14696200 |
| C | -1 | -4.79697700  | -2.58123400  | -1.93947700 |
| C | -1 | -6.39799400  | -4.29978100  | -3.36405700 |
| C | -1 | 0.67563000   | 2.84172900   | -2.88353300 |
| C | -1 | 0.38549600   | 4.08230500   | -3.67102900 |
| C | -1 | -0.22122200  | 6.43619100   | -4.94261400 |
| C | -1 | 4.57356100   | 0.94910100   | 2.24804200  |
| C | -1 | 6.05662700   | 0.79711900   | 2.35702600  |
| C | -1 | 8.78222600   | 0.45976400   | 2.36172200  |
| C | -1 | -0.73172200  | -2.22708000  | 4.67836500  |
| C | -1 | -1.50010400  | -1.91970000  | 5.92424900  |
| C | -1 | -3.07137200  | -1.26357100  | 8.08057000  |
| H | -1 | 1.45590500   | -0.00051500  | -2.53058500 |
| H | -1 | 1.86330600   | 2.34164700   | 2.66744100  |
| H | -1 | 0.61313600   | -3.31657300  | 2.08682400  |
| C | -1 | 14.11622500  | -2.28788800  | -2.14705300 |
| O | -1 | 14.96348500  | -1.58591700  | -1.62288800 |
| H | -1 | 15.37637000  | -3.56125500  | -2.73158600 |
| H | -1 | -7.64863200  | -8.77290400  | -8.94338000 |
| H | -1 | -6.34130000  | -12.85168300 | -5.96292200 |
| H | -1 | -10.53017300 | -9.80235100  | -5.72371600 |
| H | -1 | 15.64166400  | 0.00903300   | 0.23086900  |
| H | -1 | -2.87149300  | 14.11433900  | -3.44714900 |
| C | -1 | -1.51092100  | 11.41104000  | -7.44624800 |
| O | -1 | -2.64623000  | 11.83495900  | -7.57053700 |
| O | -1 | -0.42336500  | 12.07872800  | -7.87840100 |
| H | -1 | -0.73145000  | 12.93045500  | -8.24231700 |
| H | -1 | -5.50805400  | 12.66022300  | -6.59828900 |
| H | -1 | -10.26614400 | 2.92076000   | 12.54968000 |
| H | -1 | -8.42481700  | -0.49075600  | 12.86902300 |
| H | -1 | 14.92976500  | -3.73241100  | 2.56005700  |
| H | -1 | 0.10742100   | -0.91089100  | 6.93814200  |
| H | -1 | -1.31725400  | -0.28432300  | 8.89097900  |
| H | -1 | -3.31378400  | -2.85596100  | 5.23751700  |
| H | -1 | -3.19850900  | 1.10886200   | 9.42984000  |
| H | -1 | -4.79140200  | 1.66855000   | 11.27991800 |
| H | -1 | -6.34934300  | -2.32110400  | 10.94364800 |
| H | -1 | 5.61615600   | -2.41793400  | 3.45529700  |
| H | -1 | 7.37575500   | -5.28831500  | -0.09824800 |
| H | -1 | 4.91412500   | -4.83085900  | -0.02116900 |
| H | -1 | 11.78109300  | -4.40560700  | 3.62303700  |
| H | -1 | 11.83398700  | -4.21846600  | -0.66372400 |
| H | -1 | 9.33224400   | -4.07752400  | -0.60959400 |
| H | -1 | 5.73692100   | -2.99325800  | -1.61240500 |
| H | -1 | 12.02267100  | -3.69454200  | -3.30905900 |
| H | -1 | 12.91928100  | -0.20885200  | -0.96975900 |
| H | -1 | 10.44997400  | 0.22189100   | -0.82247400 |
| H | -1 | 8.66832700   | 0.87932700   | -2.20629700 |
| H | -1 | 6.20148100   | 1.25029900   | -2.02120600 |
| H | -1 | 2.02283200   | 5.23963400   | -2.88833400 |
| H | -1 | 0.97159100   | 10.22020200  | -7.04543400 |
| H | -1 | -3.23842500  | 9.65284500   | -6.44395400 |
| H | -1 | -2.69969200  | 7.48860200   | -5.28712500 |

|   |    |             |              |             |
|---|----|-------------|--------------|-------------|
| H | -1 | -1.88303000 | 5.37476900   | -5.83432300 |
| H | -1 | -1.32377400 | 3.23382100   | -4.66343500 |
| H | -1 | -3.52865400 | 5.60485300   | 0.84583100  |
| H | -1 | -4.16729300 | 7.81109900   | -0.14167800 |
| H | -1 | -3.09483100 | 4.10206500   | -3.14578000 |
| H | -1 | -5.70375900 | 9.44924300   | -5.56119000 |
| H | -1 | -3.78703900 | 11.77056500  | -2.49637800 |
| H | -1 | -3.29038400 | 9.62693100   | -1.30285300 |
| H | -1 | -3.54081900 | 2.12925400   | 5.69628400  |
| H | -1 | -5.73347700 | -1.20322700  | 4.11744800  |
| H | -1 | -7.33259300 | -0.94953300  | 6.01682200  |
| H | -1 | -8.02193100 | 3.33030900   | 10.04427300 |
| H | -1 | -9.31702100 | -0.76790100  | 10.08947500 |
| H | -1 | -7.82322000 | -1.17160500  | 8.12989000  |
| H | -1 | 0.61520600  | -4.63232500  | -4.16008600 |
| H | -1 | -0.65503200 | -6.35916200  | -5.45598900 |
| H | -1 | -2.52222900 | -7.76315200  | -5.17158500 |
| H | -1 | -4.05125300 | -9.39685300  | -6.29797000 |
| H | -1 | -5.53173800 | -6.15820600  | -8.69284700 |
| H | -1 | -2.74763800 | -2.01387700  | -4.62440300 |
| H | -1 | -0.43926200 | -5.99724900  | -2.31303300 |
| H | -1 | -4.76097400 | -7.28535300  | -0.41077400 |
| H | -1 | -3.36742400 | -5.59378400  | 0.79388800  |
| H | -1 | -6.01664900 | -7.41762500  | -2.41387900 |
| H | -1 | -7.38173200 | -9.12985600  | -3.64073000 |
| H | -1 | -3.74217000 | -11.25967700 | -4.43860200 |
| H | -1 | -4.86929600 | -1.27333200  | -3.64799200 |
| H | -1 | -6.33859900 | -2.82345700  | -4.94908100 |
| H | -1 | -4.97124500 | -4.10562800  | -0.43117900 |
| H | -1 | -9.53256600 | -7.50228100  | -3.45088200 |
| H | -1 | -7.63227600 | -6.64417300  | -7.20673700 |
| H | -1 | -6.29338200 | -4.88887800  | -6.03094200 |
| H | -1 | 6.44089400  | 1.67145900   | 0.42930000  |
| H | -1 | 12.80063700 | 1.74024600   | 0.86383300  |
| H | -1 | 12.72679200 | -1.94279400  | 3.07317100  |
| H | -1 | 10.27014600 | -1.60332500  | 3.39155900  |
| H | -1 | 8.53181600  | -0.41863800  | 4.32785500  |
| H | -1 | 6.05038400  | -0.11765800  | 4.30693200  |
| H | -1 | 2.33346500  | 8.07227300   | -1.67576300 |
| H | -1 | 2.77294300  | 5.87163600   | -0.56261000 |
| H | -1 | -1.11505300 | 6.15767800   | 1.22082900  |
| H | -1 | 0.94992400  | 8.92709900   | -3.39209900 |
| H | -1 | 0.21182200  | 11.01780200  | -4.56447400 |
| H | -1 | -1.71603100 | 12.21595300  | -0.92176400 |
| N | -1 | -2.12495600 | -7.17169900  | -2.53154200 |
| N | -1 | -3.53141200 | -9.53052000  | -3.33597500 |
| N | -1 | -2.96000500 | -3.87904900  | -5.48592400 |
| N | -1 | -4.04798000 | -5.66309700  | -7.35268800 |
| N | -1 | -6.03845200 | -4.64529200  | -2.11217900 |
| N | -1 | -8.11804600 | -6.00633400  | -3.40755300 |
| N | -1 | 10.96270400 | 1.19035800   | 1.60899900  |
| N | -1 | 8.20832200  | 1.04904500   | 1.29348100  |
| N | -1 | -0.72271200 | 10.41340300  | -0.84620700 |
| N | -1 | -0.59010000 | 7.73953200   | -0.00014300 |
| N | -1 | -5.18882100 | 1.55301600   | 6.80010400  |
| N | -1 | -7.21175000 | 2.12696100   | 8.58221300  |
| N | -1 | -3.61433900 | -2.00213100  | 7.09221200  |
| N | -1 | -4.82861200 | -1.85220700  | 9.63605200  |
| N | -1 | 7.30083200  | -3.28024600  | 2.62727500  |
| N | -1 | 9.93361300  | -4.28987900  | 2.71952000  |

|   |    |             |             |             |
|---|----|-------------|-------------|-------------|
| N | -1 | 7.68268500  | -2.33769800 | -1.83747400 |
| N | -1 | 10.38927600 | -2.59182400 | -2.70526700 |
| N | -1 | 0.44451900  | 8.48260800  | -6.06805800 |
| N | -1 | 0.86974700  | 6.39920600  | -4.15243600 |
| N | -1 | -3.65516100 | 6.08318600  | -3.00700300 |
| N | -1 | -4.92076700 | 8.37086800  | -3.99154000 |
| C | 0  | 0.82780809  | 2.42242457  | 5.87800527  |
| O | 0  | 1.79456109  | 2.96474057  | 5.50339127  |
| O | 0  | -0.13885091 | 1.87778257  | 6.24728527  |

Sum of electronic and thermal Free Energies = -13236.780863 (Hartree/Particle).

**Table S12:** DFT-optimized geometry of  $\mathbf{f}[\text{Ce}^{\text{IV}}(\text{COOH})\text{-Ce}^{\text{III}}]^-$  (singlet), computed at the B3LYP-D3/ 6-31G\* (HCNO)/ MWB28 (Ce) level in water solvent using PCM.

| Atom |    | x            | y            | z           |
|------|----|--------------|--------------|-------------|
| Ce   | -1 | 1.39611600   | -2.17645300  | -0.57208700 |
| Ce   | 0  | -0.98505500  | 1.83575900   | 1.96058600  |
| Ce   | -1 | -1.73928000  | -1.65604300  | 1.52505700  |
| Ce   | -1 | 2.17182200   | 1.56100800   | -0.10268600 |
| Ce   | -1 | -1.23796000  | 0.44967500   | -1.40192200 |
| Ce   | 0  | 1.67699900   | -0.66507600  | 2.98704800  |
| O    | -1 | -4.63556000  | 13.16048700  | -4.44957900 |
| C    | -1 | -4.14214700  | 10.83256000  | -2.82565700 |
| C    | -1 | -3.87811700  | 9.63635500   | -2.16784900 |
| O    | -1 | -6.05702900  | -9.93835900  | -7.78145600 |
| C    | -1 | -4.00104400  | -8.31250600  | -6.65751000 |
| C    | -1 | -3.14277100  | -7.40895300  | -6.04479600 |
| O    | -1 | 14.14027000  | -4.01061900  | 0.37257700  |
| C    | -1 | 11.30379800  | -4.20826800  | 0.23301300  |
| C    | -1 | 9.91725500   | -4.15755200  | 0.26780400  |
| O    | -1 | 14.81964800  | 0.44482900   | 0.58826900  |
| C    | -1 | 12.26483900  | 1.02232400   | 1.43402400  |
| O    | -1 | -6.83466000  | 1.09236600   | 12.74377600 |
| C    | -1 | -4.77655300  | 0.59605200   | 10.82915000 |
| C    | -1 | -3.89201000  | 0.29072200   | 9.80216000  |
| O    | -1 | -9.21086700  | -8.63333000  | -7.31894700 |
| C    | -1 | -7.74731400  | -6.42302900  | -6.20083000 |
| C    | -1 | -7.01966400  | -5.44155700  | -5.53891500 |
| C    | -1 | -2.24750800  | 9.35724200   | -6.27141200 |
| C    | -1 | -1.94145500  | 8.15288000   | -5.65296700 |
| O    | -1 | -2.33577400  | 13.63326500  | -2.74660400 |
| C    | -1 | -1.15490000  | 11.52511000  | -1.41380700 |
| C    | -1 | 12.20600500  | -0.80398800  | -1.46545000 |
| C    | -1 | 10.83906300  | -0.56449600  | -1.40083600 |
| O    | -1 | -7.65008800  | -11.19624400 | -5.13631300 |
| C    | -1 | -6.27767900  | -9.21787400  | -3.61209000 |
| C    | -1 | -5.52266700  | -8.28321900  | -2.91618100 |
| O    | -1 | -10.00461300 | 0.55040500   | 12.17563400 |
| C    | -1 | -8.73664700  | -0.05217400  | 9.64599600  |
| C    | -1 | -7.90801100  | -0.25877500  | 8.55002100  |
| O    | -1 | 14.42335900  | -3.35259600  | -2.83309100 |
| C    | -1 | 11.71456100  | -2.74740800  | -2.78531800 |
| O    | -1 | -5.69771100  | -12.25323000 | -5.54202500 |
| C    | -1 | -4.24074100  | -10.40053900 | -4.07269400 |

|   |    |              |             |             |
|---|----|--------------|-------------|-------------|
| O | -1 | -9.78802800  | 2.74618000  | 11.72004600 |
| C | -1 | -8.01615200  | 2.23858000  | 9.64089300  |
| O | -1 | -1.32009700  | 13.11644200 | -4.69726600 |
| C | -1 | -0.06234300  | 10.87606100 | -3.45004100 |
| C | -1 | 0.36658600   | 9.72687100  | -2.79900300 |
| O | -1 | 15.00474000  | -1.34747800 | 1.94718400  |
| C | -1 | 12.23153100  | -1.03697300 | 2.66553200  |
| C | -1 | 10.86835100  | -0.84048600 | 2.85513200  |
| C | -1 | 0.10540100   | 9.69069500  | -6.60628500 |
| O | -1 | -10.14295900 | -9.02250000 | -5.30552900 |
| C | -1 | -8.79795700  | -6.93096300 | -4.10364900 |
| O | -1 | -7.62384900  | -1.00016700 | 12.44818700 |
| C | -1 | -5.65246800  | -1.62946300 | 10.61434400 |
| O | -1 | 14.03667800  | -4.04330700 | 2.62863500  |
| C | -1 | 11.28024400  | -4.31846100 | 2.63042900  |
| O | -1 | -5.54276700  | 11.84451800 | -6.03678900 |
| C | -1 | -5.19840200  | 9.54522400  | -4.55416600 |
| O | -1 | -6.81832400  | -8.16740300 | -8.95953200 |
| C | -1 | -4.84680800  | -6.49503200 | -7.97657200 |
| O | -1 | 0.16370700   | -4.28240600 | -0.53350800 |
| C | -1 | -1.37296200  | -6.25054200 | -1.92303400 |
| O | -1 | -2.83279600  | 1.35835200  | 3.39657900  |
| C | -1 | -4.37017300  | 1.37783500  | 5.76357200  |
| O | -1 | 0.09649000   | 4.07902600  | 1.82470700  |
| C | -1 | 1.81881900   | 6.41792600  | -0.37087400 |
| C | -1 | 1.56418700   | 7.63796400  | -0.98390400 |
| O | -1 | 3.57879700   | -1.65509000 | -1.54222200 |
| C | -1 | 6.37577000   | -2.07882300 | -1.76573900 |
| O | -1 | -3.47361500  | -0.76364000 | 2.99201100  |
| C | -1 | -5.58374200  | -0.48375300 | 4.86433400  |
| C | -1 | -6.46336300  | -0.35795100 | 5.93259300  |
| O | -1 | 2.01361500   | 3.82140300  | 0.67122500  |
| C | -1 | -0.35707600  | 6.57226500  | 0.62856300  |
| O | -1 | 3.91186600   | 0.56769600  | -1.40497700 |
| C | -1 | 6.62371600   | 0.29718600  | -1.96876900 |
| C | -1 | 7.99345200   | 0.09317600  | -2.06667100 |
| O | -1 | -1.53919300  | -3.97464300 | 0.90907700  |
| C | -1 | -3.01133700  | -6.03611300 | -0.18588700 |
| C | -1 | -3.78114200  | -6.96805700 | -0.86680200 |
| O | -1 | -0.86660300  | -1.00452900 | -3.32845100 |
| C | -1 | -2.25666700  | -2.93497800 | -4.82610700 |
| O | -1 | 3.24017100   | -2.50283900 | 2.70722900  |
| C | -1 | 5.99805200   | -3.04910900 | 2.63186900  |
| O | -1 | -2.60296400  | 2.43734400  | -1.36586700 |
| C | -1 | -3.34050900  | 4.92712500  | -2.43097000 |
| O | -1 | -2.51651500  | 3.29953700  | 0.71337100  |
| C | -1 | -3.57713700  | 5.74630200  | -0.19175200 |
| C | -1 | -3.92954800  | 6.97624800  | -0.73561800 |
| O | -1 | 0.75613400   | -2.49142500 | -2.84982000 |
| C | -1 | -0.36883000  | -4.39330700 | -4.57052800 |
| C | -1 | -1.07652100  | -5.34806000 | -5.28967300 |
| O | -1 | 2.96779300   | -3.46325000 | 0.68633400  |
| C | -1 | 5.60420300   | -4.38245900 | 0.67462800  |
| C | -1 | 6.97087200   | -4.62107200 | 0.62757400  |
| O | -1 | -3.58340200  | -2.11418200 | 0.02157500  |
| C | -1 | -5.25001900  | -3.80007800 | -1.46298300 |
| O | -1 | 1.71495300   | 2.82429400  | -2.15527300 |
| C | -1 | 1.13721200   | 5.28395400  | -3.50538500 |
| O | -1 | 4.12491800   | 1.66177200  | 1.29177000  |
| C | -1 | 6.66044600   | 0.20745000  | 3.46364700  |



|   |    |             |              |             |
|---|----|-------------|--------------|-------------|
| C | -1 | 8.04079200  | 0.03996000   | 3.46671900  |
| O | -1 | -1.37344000 | -2.73185700  | 3.68173200  |
| C | -1 | -2.83794400 | -2.34105300  | 6.02050100  |
| O | -1 | -3.31683300 | -0.73439500  | -1.73854600 |
| C | -1 | -5.19087100 | -2.20225600  | -3.24817500 |
| C | -1 | -5.99767700 | -3.06813700  | -3.97738600 |
| O | -1 | 0.52295300  | -1.97114900  | 4.63443700  |
| C | -1 | -0.93053900 | -1.23809300  | 6.96116600  |
| C | -1 | -1.72747100 | -0.90014000  | 8.04870200  |
| O | -1 | 3.85580300  | 0.35370500   | 3.10588600  |
| C | -1 | 6.88337700  | 1.23020200   | 1.30667200  |
| O | -1 | -0.19194600 | 1.94284200   | -2.97099800 |
| C | -1 | -0.73386900 | 4.16229800   | -4.49957600 |
| C | -1 | -1.04767000 | 5.35509000   | -5.13420000 |
| O | -1 | 2.12410100  | -0.50965400  | 0.78711900  |
| O | -1 | 0.00448800  | 1.77612000   | -0.03776500 |
| O | -1 | -0.45606200 | -0.17602800  | 2.64434800  |
| O | -1 | -0.68345700 | -1.50614900  | -0.45043000 |
| O | -1 | 0.58783000  | -2.42064000  | 1.69742000  |
| O | -1 | 1.17940700  | -0.01880200  | -1.60702100 |
| O | -1 | 1.40889100  | 1.58503600   | 2.26045000  |
| O | -1 | -2.08762600 | 0.39106300   | 0.68343800  |
| C | -1 | -4.97289400 | 12.05355000  | -4.83615700 |
| C | -1 | -4.79638300 | 10.79723500  | -4.06066000 |
| C | -1 | -4.28058000 | 8.43076600   | -2.76371300 |
| C | -1 | -5.95119700 | -8.77332800  | -8.12188500 |
| C | -1 | -4.89905000 | -7.85153400  | -7.62343400 |
| C | -1 | -3.20367700 | -6.05934100  | -6.42990500 |
| C | -1 | 13.48990300 | -4.11487400  | 1.39732300  |
| C | -1 | 12.01256600 | -4.25984700  | 1.43504000  |
| C | -1 | 9.27642200  | -4.17028100  | 1.51716700  |
| C | -1 | 14.35351100 | -0.40873000  | 1.52233600  |
| C | -1 | 12.94903300 | -0.10994800  | 1.90570200  |
| C | -1 | 10.25868300 | 0.28797700   | 2.28627200  |
| C | -1 | -6.73379000 | -0.01282100  | 12.23727000 |
| C | -1 | -5.68581500 | -0.37806800  | 11.24944300 |
| C | -1 | -3.95441000 | -0.98000000  | 9.20978400  |
| C | -1 | -9.34464700 | -8.33623400  | -6.14285200 |
| C | -1 | -8.64608800 | -7.20752200  | -5.47269000 |
| C | -1 | -7.20640900 | -5.27159300  | -4.15886700 |
| C | -1 | -1.20965900 | 10.15666200  | -6.75581200 |
| C | -1 | -0.59301100 | 7.77611900   | -5.54472500 |
| C | -1 | -1.49459400 | 12.90503600  | -3.51031500 |
| C | -1 | -0.86639900 | 11.78784300  | -2.76092400 |
| C | -1 | -0.02240200 | 9.52734300   | -1.46450900 |
| C | -1 | 12.66615700 | -1.92481800  | -2.16103800 |
| C | -1 | 9.96447700  | -1.45215400  | -2.04788700 |
| C | -1 | -6.44163300 | -11.26896600 | -5.00105800 |
| C | -1 | -5.63271300 | -10.30174300 | -4.21410800 |
| C | -1 | -4.13196500 | -8.46787600  | -2.83496500 |
| C | -1 | -9.58177300 | 1.44441600   | 11.45725200 |
| C | -1 | -8.79221700 | 1.22282700   | 10.21938700 |
| C | -1 | -7.15398300 | 0.81672500   | 8.05150300  |
| C | -1 | -0.98341100 | -4.56349100  | -0.06978200 |
| C | -1 | -1.78258300 | -5.64549400  | -0.72773200 |
| C | -1 | -3.30029600 | -7.49190100  | -2.07646100 |
| C | -1 | -3.54127300 | 0.32578200   | 3.62780600  |
| C | -1 | -4.51706900 | 0.41021200   | 4.75866500  |
| C | -1 | -6.23280900 | 0.64122900   | 6.89130800  |
| C | -1 | 0.99269200  | 4.49465700   | 1.03519400  |

|   |    |              |              |             |
|---|----|--------------|--------------|-------------|
| C | -1 | 0.83102900   | 5.85384000   | 0.44121400  |
| C | -1 | 0.32622700   | 8.26177200   | -0.76435600 |
| C | -1 | 4.31585600   | -0.62530000  | -1.57506100 |
| C | -1 | 5.78544200   | -0.80777800  | -1.79307000 |
| C | -1 | 8.49347400   | -1.21613300  | -1.99065100 |
| C | -1 | -0.31389800  | -2.13715700  | -3.44557400 |
| C | -1 | -0.97228500  | -3.15914300  | -4.31178300 |
| C | -1 | -2.37444100  | -5.04169000  | -5.72874400 |
| C | -1 | 3.66378000   | -3.15743100  | 1.70382900  |
| C | -1 | 5.09916000   | -3.55991100  | 1.68569500  |
| C | -1 | 7.79733200   | -4.02218400  | 1.59161600  |
| C | -1 | -2.76947800  | 3.37519200   | -0.52901600 |
| C | -1 | -3.25633100  | 4.69207000   | -1.05120500 |
| C | -1 | -3.95140800  | 7.12144100   | -2.13136000 |
| C | -1 | -3.83575500  | -1.73989500  | -1.16447600 |
| C | -1 | -4.78789000  | -2.57452100  | -1.96291000 |
| C | -1 | -6.38355200  | -4.28788200  | -3.39969200 |
| C | -1 | 0.66694900   | 2.87286900   | -2.86837600 |
| C | -1 | 0.37266800   | 4.11817200   | -3.64681900 |
| C | -1 | -0.24188500  | 6.47923200   | -4.90122400 |
| C | -1 | 4.57173100   | 0.95587500   | 2.24882700  |
| C | -1 | 6.05538900   | 0.80783500   | 2.35652000  |
| C | -1 | 8.78206700   | 0.47925800   | 2.35836600  |
| C | -1 | -0.72275600  | -2.25511000  | 4.65680200  |
| C | -1 | -1.49192400  | -1.95930300  | 5.90495000  |
| C | -1 | -3.06496400  | -1.32393400  | 8.06619000  |
| H | -1 | 1.45649500   | 0.03068700   | -2.53614800 |
| H | -1 | 1.85724300   | 2.33639200   | 2.67858800  |
| H | -1 | 0.62533300   | -3.32149600  | 2.05714200  |
| C | -1 | 14.12422700  | -2.21832000  | -2.17093700 |
| O | -1 | 14.96929100  | -1.51742100  | -1.64181200 |
| H | -1 | 15.38840300  | -3.48332000  | -2.76485700 |
| H | -1 | -7.62056900  | -8.72448000  | -9.01112300 |
| H | -1 | -6.29953900  | -12.82049400 | -6.06049000 |
| H | -1 | -10.49824100 | -9.78658100  | -5.79861300 |
| H | -1 | 15.64259000  | 0.06624100   | 0.22336600  |
| H | -1 | -2.91680600  | 14.13770000  | -3.34977700 |
| C | -1 | -1.54811300  | 11.46788900  | -7.36855300 |
| O | -1 | -2.68481000  | 11.88901100  | -7.48961000 |
| O | -1 | -0.46279800  | 12.14221700  | -7.79600300 |
| H | -1 | -0.77370100  | 12.99555500  | -8.15369300 |
| H | -1 | -5.54914100  | 12.69791700  | -6.51101400 |
| H | -1 | -10.27255200 | 2.80452900   | 12.56649800 |
| H | -1 | -8.42011900  | -0.60322100  | 12.86085000 |
| H | -1 | 14.94320200  | -3.69427800  | 2.52546700  |
| H | -1 | 0.11248600   | -0.95267100  | 6.92591400  |
| H | -1 | -1.31390100  | -0.34490000  | 8.88343700  |
| H | -1 | -3.30266400  | -2.89645200  | 5.21170100  |
| H | -1 | -3.19957800  | 1.03823200   | 9.43264100  |
| H | -1 | -4.79398200  | 1.57932300   | 11.28694400 |
| H | -1 | -6.33902900  | -2.41282200  | 10.92197400 |
| H | -1 | 5.62552300   | -2.41654800  | 3.43148400  |
| H | -1 | 7.39385300   | -5.25537100  | -0.14301500 |
| H | -1 | 4.93076400   | -4.80647500  | -0.06228600 |
| H | -1 | 11.79690100  | -4.38537300  | 3.58397000  |
| H | -1 | 11.84850100  | -4.16699300  | -0.70132900 |
| H | -1 | 9.34632300   | -4.03456400  | -0.64583800 |
| H | -1 | 5.74734200   | -2.95472800  | -1.64027100 |
| H | -1 | 12.03506200  | -3.62329900  | -3.34282300 |
| H | -1 | 12.92073600  | -0.15176700  | -0.97844000 |

|   |    |             |              |             |
|---|----|-------------|--------------|-------------|
| H | -1 | 10.45006800 | 0.26988500   | -0.82769900 |
| H | -1 | 8.66607700  | 0.93155000   | -2.20647500 |
| H | -1 | 6.19807100  | 1.29316500   | -2.01836300 |
| H | -1 | 2.00636600  | 5.27510300   | -2.85597900 |
| H | -1 | 0.93831200  | 10.28223700  | -6.97672100 |
| H | -1 | -3.26974600 | 9.69687900   | -6.37879500 |
| H | -1 | -2.72381100 | 7.52606700   | -5.23775900 |
| H | -1 | -1.90038500 | 5.41891600   | -5.80037800 |
| H | -1 | -1.33400000 | 3.27136400   | -4.64511600 |
| H | -1 | -3.54567700 | 5.59523200   | 0.88149300  |
| H | -1 | -4.19162700 | 7.80649400   | -0.08990800 |
| H | -1 | -3.10762100 | 4.12283300   | -3.12096500 |
| H | -1 | -5.73426500 | 9.47888600   | -5.49719300 |
| H | -1 | -3.82459200 | 11.78413700  | -2.41589600 |
| H | -1 | -3.32079700 | 9.63353100   | -1.23800900 |
| H | -1 | -3.54579200 | 2.08454400   | 5.70662600  |
| H | -1 | -5.72788400 | -1.24350100  | 4.10397400  |
| H | -1 | -7.32751000 | -1.00877200  | 6.00535500  |
| H | -1 | -8.03008200 | 3.23950500   | 10.06381900 |
| H | -1 | -9.31186500 | -0.86310400  | 10.07948900 |
| H | -1 | -7.81707600 | -1.24774500  | 8.11682400  |
| H | -1 | 0.63056100  | -4.59189300  | -4.19906800 |
| H | -1 | -0.63427700 | -6.31340300  | -5.50728100 |
| H | -1 | -2.49686400 | -7.72546800  | -5.23280700 |
| H | -1 | -4.02076200 | -9.35591300  | -6.37079800 |
| H | -1 | -5.51212600 | -6.10481200  | -8.74193200 |
| H | -1 | -2.74083100 | -1.98107300  | -4.64393200 |
| H | -1 | -0.41917800 | -5.97358300  | -2.36181500 |
| H | -1 | -4.73638500 | -7.28945600  | -0.46835200 |
| H | -1 | -3.34813600 | -5.60215200  | 0.74835000  |
| H | -1 | -5.99194600 | -7.41127800  | -2.47219300 |
| H | -1 | -7.35166500 | -9.11899200  | -3.71123700 |
| H | -1 | -3.70534100 | -11.23115300 | -4.52502400 |
| H | -1 | -4.86472400 | -1.25451200  | -3.66188900 |
| H | -1 | -6.32919900 | -2.79992400  | -4.97398000 |
| H | -1 | -4.95697100 | -4.11036700  | -0.46567800 |
| H | -1 | -9.50773500 | -7.49982300  | -3.50930100 |
| H | -1 | -7.61083900 | -6.60835200  | -7.25909600 |
| H | -1 | -6.27745700 | -4.85729100  | -6.07079100 |
| H | -1 | 6.43650900  | 1.69732600   | 0.43509800  |
| H | -1 | 12.79606500 | 1.78359500   | 0.86925100  |
| H | -1 | 12.73451800 | -1.91558400  | 3.05184100  |
| H | -1 | 10.27683600 | -1.58640300  | 3.37301800  |
| H | -1 | 8.53482300  | -0.41418100  | 4.31811400  |
| H | -1 | 6.05242300  | -0.12110900  | 4.29971300  |
| H | -1 | 2.30800400  | 8.09987100   | -1.62294700 |
| H | -1 | 2.75479600  | 5.89266000   | -0.52583600 |
| H | -1 | -1.13382200 | 6.15315200   | 1.26015900  |
| H | -1 | 0.92142400  | 8.96262300   | -3.33285300 |
| H | -1 | 0.17635800  | 11.05936300  | -4.48994100 |
| H | -1 | -1.75478700 | 12.22481700  | -0.83837700 |
| N | -1 | -2.10109000 | -7.15188200  | -2.58860100 |
| N | -1 | -3.50001700 | -9.50936000  | -3.40992000 |
| N | -1 | -2.94728600 | -3.84063000  | -5.51892200 |
| N | -1 | -4.02976800 | -5.61461900  | -7.39842200 |
| N | -1 | -6.02269200 | -4.64129100  | -2.15040100 |
| N | -1 | -8.09806700 | -5.99964700  | -3.45532200 |
| N | -1 | 10.96004400 | 1.22236000   | 1.61066100  |
| N | -1 | 8.20608500  | 1.07440200   | 1.29450400  |
| N | -1 | -0.75561600 | 10.42499900  | -0.77602500 |

|   |    |             |             |             |
|---|----|-------------|-------------|-------------|
| N | -1 | -0.61419800 | 7.74551000  | 0.05061600  |
| N | -1 | -5.19174100 | 1.49497600  | 6.80646500  |
| N | -1 | -7.21623600 | 2.04942200  | 8.59296500  |
| N | -1 | -3.60569000 | -2.05706900 | 7.07257900  |
| N | -1 | -4.82003600 | -1.92952700 | 9.61760400  |
| N | -1 | 7.31285400  | -3.26736500 | 2.59700300  |
| N | -1 | 9.94891000  | -4.26909400 | 2.68156600  |
| N | -1 | 7.69093300  | -2.29124500 | -1.86084800 |
| N | -1 | 10.39819400 | -2.53029200 | -2.73083000 |
| N | -1 | 0.41703500  | 8.53590300  | -6.01189500 |
| N | -1 | 0.84932500  | 6.44006000  | -4.11148400 |
| N | -1 | -3.67435200 | 6.10106700  | -2.96775400 |
| N | -1 | -4.94752800 | 8.39170800  | -3.93550900 |
| C | 0  | 0.98280700  | 0.99433500  | 4.96145400  |
| O | 0  | 1.32255100  | 1.04456300  | 6.12990500  |
| O | 0  | -0.03135400 | 1.91355300  | 4.57035200  |
| H | 0  | -0.32035000 | 2.41961700  | 5.36068300  |

Sum of electronic and thermal Free Energies = -13237.217312 (Hartree/Particle).

**Table S13:** DFT-optimized geometry of  $f\text{-[Ce}^{\text{IV}}(\text{COOH})\text{-Ce}^{\text{IV}}(\text{CO}_2\text{)}\text{]}^-$  (singlet), computed at the B3LYP-D3/ 6-31G\* (HCNO)/ MWB28 (Ce) level in water solvent using PCM.

| Atom |    | x           | y            | z           |
|------|----|-------------|--------------|-------------|
| Ce   | -1 | 1.39041100  | -2.20607700  | -0.59971400 |
| Ce   | 0  | -1.02586900 | 1.85942500   | 1.83282800  |
| Ce   | -1 | -1.73795400 | -1.66133600  | 1.50174800  |
| Ce   | -1 | 2.15945300  | 1.53968500   | -0.18921800 |
| Ce   | -1 | -1.25283900 | 0.40152800   | -1.45829100 |
| Ce   | 0  | 1.68476500  | -0.67027300  | 2.87356600  |
| O    | -1 | -4.69115900 | 13.05784900  | -4.68197600 |
| C    | -1 | -4.18612900 | 10.75553700  | -3.02543600 |
| C    | -1 | -3.91681900 | 9.56987900   | -2.35088600 |
| O    | -1 | -6.07315800 | -10.09127900 | -7.66301900 |
| C    | -1 | -4.01650100 | -8.44427300  | -6.57156900 |
| C    | -1 | -3.15789800 | -7.52977200  | -5.97579500 |
| O    | -1 | 14.14228500 | -3.99772800  | 0.32207400  |
| C    | -1 | 11.30574700 | -4.20371400  | 0.19663800  |
| C    | -1 | 9.91923900  | -4.15555200  | 0.23612400  |
| O    | -1 | 14.81238100 | 0.46193800   | 0.46855200  |
| C    | -1 | 12.25958600 | 1.04634800   | 1.31563700  |
| O    | -1 | -6.79575500 | 1.24307000   | 12.69814900 |
| C    | -1 | -4.74401100 | 0.72276600   | 10.78306200 |
| C    | -1 | -3.86279000 | 0.40408700   | 9.75727200  |
| O    | -1 | -9.22812300 | -8.78646800  | -7.20763800 |
| C    | -1 | -7.76524200 | -6.55647900  | -6.12841100 |
| C    | -1 | -7.03724600 | -5.56362100  | -5.48409000 |
| C    | -1 | -2.30160200 | 9.23310600   | -6.45621000 |
| C    | -1 | -1.99040400 | 8.03879700   | -5.82106200 |
| O    | -1 | -2.38582600 | 13.56109900  | -2.99531200 |
| C    | -1 | -1.19497700 | 11.47570600  | -1.63584700 |
| C    | -1 | 12.19358700 | -0.82319700  | -1.55599500 |
| C    | -1 | 10.82636800 | -0.58579200  | -1.48958600 |
| O    | -1 | -7.65302500 | -11.31303300 | -4.99314400 |
| C    | -1 | -6.27917600 | -9.30908400  | -3.50403800 |

|   |    |              |              |             |
|---|----|--------------|--------------|-------------|
| C | -1 | -5.52357900  | -8.36246900  | -2.82513600 |
| O | -1 | -9.96666100  | 0.68567100   | 12.15063800 |
| C | -1 | -8.70720900  | 0.04817800   | 9.62530800  |
| C | -1 | -7.88238700  | -0.17293700  | 8.52928800  |
| O | -1 | 14.41137100  | -3.38703900  | -2.89414900 |
| C | -1 | 11.70141300  | -2.78719900  | -2.84475900 |
| O | -1 | -5.69985000  | -12.37163900 | -5.39071000 |
| C | -1 | -4.24137000  | -10.49398700 | -3.95494600 |
| O | -1 | -9.75684200  | 2.87486900   | 11.66147200 |
| C | -1 | -7.99194300  | 2.34018900   | 9.58317300  |
| O | -1 | -1.37659600  | 13.01744400  | -4.94202100 |
| C | -1 | -0.10890200  | 10.79873200  | -3.66644700 |
| C | -1 | 0.32517200   | 9.66034700   | -3.00001900 |
| O | -1 | 15.00684300  | -1.30945700  | 1.85333400  |
| C | -1 | 12.23575900  | -0.99439200  | 2.57787200  |
| C | -1 | 10.87288600  | -0.79811100  | 2.76988100  |
| C | -1 | 0.04921900   | 9.56672500   | -6.80527900 |
| O | -1 | -10.15146600 | -9.14757900  | -5.18498200 |
| C | -1 | -8.80653900  | -7.03535100  | -4.01976300 |
| O | -1 | -7.58133700  | -0.85538600  | 12.43694000 |
| C | -1 | -5.61570100  | -1.50764300  | 10.60495300 |
| O | -1 | 14.04757000  | -3.99694100  | 2.57875800  |
| C | -1 | 11.29179700  | -4.27813500  | 2.59550700  |
| O | -1 | -5.60156100  | 11.71631300  | -6.24578100 |
| C | -1 | -5.24619400  | 9.44019000   | -4.73036400 |
| O | -1 | -6.84306300  | -8.33980700  | -8.86439800 |
| C | -1 | -4.87153000  | -6.64858200  | -7.91428000 |
| O | -1 | 0.16294800   | -4.31394000  | -0.52485000 |
| C | -1 | -1.37465700  | -6.30600800  | -1.87878200 |
| O | -1 | -2.83100200  | 1.37825300   | 3.33234800  |
| C | -1 | -4.35917300  | 1.42969000   | 5.70481700  |
| O | -1 | 0.08594400   | 4.08161700   | 1.70852000  |
| C | -1 | 1.79437800   | 6.39126300   | -0.52849400 |
| C | -1 | 1.53458600   | 7.60144100   | -1.15866300 |
| O | -1 | 3.56810100   | -1.69443600  | -1.58610500 |
| C | -1 | 6.36513500   | -2.11527200  | -1.81427500 |
| O | -1 | -3.46857300  | -0.75095800  | 2.96202900  |
| C | -1 | -5.57201100  | -0.44780400  | 4.83825300  |
| C | -1 | -6.44774100  | -0.30800400  | 5.90796800  |
| O | -1 | 1.99913400   | 3.81103300   | 0.55147800  |
| C | -1 | -0.37794600  | 6.55570000   | 0.47708100  |
| O | -1 | 3.89665400   | 0.53088300   | -1.48337200 |
| C | -1 | 6.60689200   | 0.25798200   | -2.05372800 |
| C | -1 | 7.97669500   | 0.05556300   | -2.15396300 |
| O | -1 | -1.53500600  | -3.98843100  | 0.91966900  |
| C | -1 | -3.00672500  | -6.06927900  | -0.13859600 |
| C | -1 | -3.77706300  | -7.01299100  | -0.80248800 |
| O | -1 | -0.88569900  | -1.08046700  | -3.36434200 |
| C | -1 | -2.27720800  | -3.03614300  | -4.82753000 |
| O | -1 | 3.24798200   | -2.47936000  | 2.67682800  |
| C | -1 | 6.00678100   | -3.02059300  | 2.59878100  |
| O | -1 | -2.62220200  | 2.38648900   | -1.44654300 |
| C | -1 | -3.36955000  | 4.85844500   | -2.54578700 |
| O | -1 | -2.52960000  | 3.27983400   | 0.61923600  |
| C | -1 | -3.59929900  | 5.71045300   | -0.31813500 |
| C | -1 | -3.95662200  | 6.93135500   | -0.87891100 |
| O | -1 | 0.74226500   | -2.55645300  | -2.86995500 |
| C | -1 | -0.38508200  | -4.48631100  | -4.55763800 |
| C | -1 | -1.09340400  | -5.45326400  | -5.25965900 |
| O | -1 | 2.96990400   | -3.47045200  | 0.67158300  |

|   |    |             |              |             |
|---|----|-------------|--------------|-------------|
| C | -1 | 5.60832900  | -4.38389900  | 0.66322900  |
| C | -1 | 6.97534200  | -4.62016400  | 0.61436400  |
| O | -1 | -3.58688200 | -2.14596200  | 0.01254100  |
| C | -1 | -5.25544500 | -3.85752900  | -1.44011300 |
| O | -1 | 1.69171200  | 2.77115600   | -2.25862200 |
| C | -1 | 1.10312400  | 5.20909000   | -3.64302000 |
| O | -1 | 4.11774000  | 1.66558900   | 1.19588300  |
| C | -1 | 6.66501800  | 0.24948600   | 3.37923600  |
| C | -1 | 8.04574300  | 0.08511500   | 3.37937600  |
| O | -1 | -1.36126000 | -2.70400200  | 3.67278700  |
| C | -1 | -2.81751200 | -2.28154700  | 6.01120600  |
| O | -1 | -3.33031500 | -0.79203500  | -1.76901800 |
| C | -1 | -5.20689100 | -2.28642500  | -3.24917900 |
| C | -1 | -6.01456700 | -3.16488500  | -3.96220100 |
| O | -1 | 0.53710400  | -1.92495400  | 4.60656100  |
| C | -1 | -0.90896200 | -1.16044100  | 6.92778700  |
| C | -1 | -1.70241000 | -0.80804400  | 8.01328400  |
| O | -1 | 3.85867600  | 0.38417500   | 3.03037000  |
| C | -1 | 6.87721000  | 1.24039400   | 1.20637200  |
| O | -1 | -0.21634800 | 1.87340000   | -3.05358700 |
| C | -1 | -0.76927000 | 4.06857100   | -4.61298500 |
| C | -1 | -1.08825200 | 5.25105300   | -5.26410600 |
| O | -1 | 2.11990600  | -0.51755400  | 0.73158200  |
| O | -1 | -0.00809400 | 1.75094800   | -0.11898800 |
| O | -1 | -0.45374200 | -0.16193100  | 2.59376100  |
| O | -1 | -0.69018800 | -1.53863300  | -0.47989600 |
| O | -1 | 0.59154200  | -2.41812300  | 1.67634900  |
| O | -1 | 1.16476700  | -0.06461100  | -1.66588300 |
| O | -1 | 1.40569400  | 1.59732300   | 2.17627900  |
| O | -1 | -2.09422800 | 0.37219400   | 0.63103900  |
| C | -1 | -5.02748500 | 11.94451700  | -5.05065500 |
| C | -1 | -4.84509600 | 10.70032000  | -4.25718900 |
| C | -1 | -4.31886500 | 8.35463500   | -2.92709700 |
| C | -1 | -5.97130000 | -8.93123200  | -8.02121600 |
| C | -1 | -4.91931300 | -7.99977000  | -7.54072600 |
| C | -1 | -3.22337100 | -6.18620200  | -6.38076700 |
| C | -1 | 13.49616000 | -4.08810200  | 1.35081300  |
| C | -1 | 12.01931500 | -4.23576400  | 1.39650300  |
| C | -1 | 9.28331500  | -4.15103400  | 1.48805000  |
| C | -1 | 14.35183100 | -0.37860300  | 1.41708400  |
| C | -1 | 12.94818400 | -0.07723600  | 1.80147000  |
| C | -1 | 10.25844200 | 0.32037700   | 2.18664000  |
| C | -1 | -6.69435200 | 0.13066600   | 12.20780500 |
| C | -1 | -5.64941200 | -0.24697700  | 11.22142500 |
| C | -1 | -3.92461500 | -0.87547800  | 9.18418300  |
| C | -1 | -9.35798800 | -8.47213300  | -6.03559200 |
| C | -1 | -8.65938400 | -7.33199300  | -5.38510900 |
| C | -1 | -7.21899100 | -5.37347500  | -4.10601000 |
| C | -1 | -1.26746900 | 10.02749600  | -6.95657100 |
| C | -1 | -0.64069600 | 7.66667900   | -5.71251500 |
| C | -1 | -1.54598100 | 12.82340600  | -3.75137000 |
| C | -1 | -0.91233100 | 11.71892400  | -2.98786100 |
| C | -1 | -0.05815200 | 9.47991600   | -1.66117400 |
| C | -1 | 12.65356700 | -1.95327200  | -2.23657700 |
| C | -1 | 9.95128200  | -1.48495000  | -2.11986600 |
| C | -1 | -6.44389000 | -11.38105300 | -4.86157400 |
| C | -1 | -5.63410400 | -10.40039500 | -4.09234100 |
| C | -1 | -4.13215500 | -8.54281500  | -2.74664500 |
| C | -1 | -9.54865900 | 1.56978500   | 11.41733100 |
| C | -1 | -8.76343600 | 1.33147600   | 10.17981500 |

|   |    |              |              |             |
|---|----|--------------|--------------|-------------|
| C | -1 | -7.13275400  | 0.89666100   | 8.01180600  |
| C | -1 | -0.98171100  | -4.59060300  | -0.05247000 |
| C | -1 | -1.78098600  | -5.68408000  | -0.69104300 |
| C | -1 | -3.29975100  | -7.55378100  | -2.00607500 |
| C | -1 | -3.53622400  | 0.34768700   | 3.58175000  |
| C | -1 | -4.50779000  | 0.44684100   | 4.71505400  |
| C | -1 | -6.21571800  | 0.70589300   | 6.85074500  |
| C | -1 | 0.97811300   | 4.48738900   | 0.90937000  |
| C | -1 | 0.81104700   | 5.83718700   | 0.29580500  |
| C | -1 | 0.29607900   | 8.22571900   | -0.94358300 |
| C | -1 | 4.30268600   | -0.66362300  | -1.63721400 |
| C | -1 | 5.77182100   | -0.84608600  | -1.85825500 |
| C | -1 | 8.47998100   | -1.25135500  | -2.06037300 |
| C | -1 | -0.33088600  | -2.21349200  | -3.46671600 |
| C | -1 | -0.99032400  | -3.24975700  | -4.31497400 |
| C | -1 | -2.39371800  | -5.15635800  | -5.69814400 |
| C | -1 | 3.66915800   | -3.14792800  | 1.68165300  |
| C | -1 | 5.10536700   | -3.54745900  | 1.66388100  |
| C | -1 | 7.80419400   | -4.00511500  | 1.56609800  |
| C | -1 | -2.78758000  | 3.33636200   | -0.62313700 |
| C | -1 | -3.27945500  | 4.64421300   | -1.16300900 |
| C | -1 | -3.98425600  | 7.05563400   | -2.27656800 |
| C | -1 | -3.84470900  | -1.78999300  | -1.17796300 |
| C | -1 | -4.79805400  | -2.63855700  | -1.96009500 |
| C | -1 | -6.39541400  | -4.37671500  | -3.36484900 |
| C | -1 | 0.64082600   | 2.80675400   | -2.96824200 |
| C | -1 | 0.34068300   | 4.03963600   | -3.76402500 |
| C | -1 | -0.28411900  | 6.38032900   | -5.05111100 |
| C | -1 | 4.56988600   | 0.97505800   | 2.16160600  |
| C | -1 | 6.05428500   | 0.83192600   | 2.26565800  |
| C | -1 | 8.78168900   | 0.50944600   | 2.26168100  |
| C | -1 | -0.70786100  | -2.21130400  | 4.63806400  |
| C | -1 | -1.47282300  | -1.89858800  | 5.88467300  |
| C | -1 | -3.03885800  | -1.23448800  | 8.04236000  |
| H | -1 | 1.43811500   | -0.02839400  | -2.59672900 |
| H | -1 | 1.85396700   | 2.35583200   | 2.58138700  |
| H | -1 | 0.63249400   | -3.31342000  | 2.04933000  |
| C | -1 | 14.11225000  | -2.24366300  | -2.24783100 |
| O | -1 | 14.95777800  | -1.53307100  | -1.73255800 |
| H | -1 | 15.37696900  | -3.51459500  | -2.82776900 |
| H | -1 | -7.64423600  | -8.89936600  | -8.90451000 |
| H | -1 | -6.30240600  | -12.94791400 | -5.89827600 |
| H | -1 | -10.50693400 | -9.91972500  | -5.66520300 |
| H | -1 | 15.63475000  | 0.07976200   | 0.10610500  |
| H | -1 | -2.97035100  | 14.05518200  | -3.60365700 |
| C | -1 | -1.61128800  | 11.32867100  | -7.58748200 |
| O | -1 | -2.74940200  | 11.74542200  | -7.71033900 |
| O | -1 | -0.52918300  | 11.99893800  | -8.02921800 |
| H | -1 | -0.84341600  | 12.84614800  | -8.39838200 |
| H | -1 | -5.61172300  | 12.56251700  | -6.73266500 |
| H | -1 | -10.23819200 | 2.94478300   | 12.50885800 |
| H | -1 | -8.37689000  | -0.45408300  | 12.84676100 |
| H | -1 | 14.95289000  | -3.64748700  | 2.46682500  |
| H | -1 | 0.13326800   | -0.87327000  | 6.88417500  |
| H | -1 | -1.28684800  | -0.23948300  | 8.83800300  |
| H | -1 | -3.28412200  | -2.84999200  | 5.21262200  |
| H | -1 | -3.17350400  | 1.14752300   | 9.37391300  |
| H | -1 | -4.76188700  | 1.71272400   | 11.22619100 |
| H | -1 | -6.29927600  | -2.28783600  | 10.92694300 |
| H | -1 | 5.63593900   | -2.37698300  | 3.39032300  |

|   |    |             |              |             |
|---|----|-------------|--------------|-------------|
| H | -1 | 7.39675300  | -5.26496500  | -0.14832800 |
| H | -1 | 4.93298500  | -4.82036400  | -0.06461900 |
| H | -1 | 11.81232000 | -4.32965300  | 3.54789900  |
| H | -1 | 11.84670500 | -4.17519700  | -0.74035200 |
| H | -1 | 9.34446900  | -4.04748900  | -0.67699900 |
| H | -1 | 5.73919200  | -2.99059300  | -1.67327300 |
| H | -1 | 12.02172400 | -3.67060900  | -3.39038200 |
| H | -1 | 12.90873000 | -0.16219500  | -1.08159200 |
| H | -1 | 10.43771900 | 0.25619400   | -0.92744200 |
| H | -1 | 8.64686400  | 0.89324100   | -2.30891300 |
| H | -1 | 6.17879600  | 1.25216500   | -2.11651100 |
| H | -1 | 1.97482300  | 5.21186300   | -2.99697900 |
| H | -1 | 0.87933300  | 10.15450900  | -7.18777900 |
| H | -1 | -3.32502000 | 9.56883900   | -6.56462800 |
| H | -1 | -2.76970900 | 7.41652700   | -5.39346800 |
| H | -1 | -1.94370200 | 5.30303400   | -5.92780200 |
| H | -1 | -1.36793900 | 3.17423600   | -4.74284600 |
| H | -1 | -3.56330900 | 5.57550200   | 0.75711500  |
| H | -1 | -4.21806400 | 7.77057300   | -0.24464200 |
| H | -1 | -3.13752900 | 4.04445200   | -3.22460900 |
| H | -1 | -5.78558000 | 9.35858700   | -5.67017900 |
| H | -1 | -3.86914000 | 11.71382900  | -2.63117900 |
| H | -1 | -3.35587100 | 9.58217700   | -1.42330800 |
| H | -1 | -3.53662800 | 2.13729100   | 5.63408400  |
| H | -1 | -5.71739200 | -1.21914200  | 4.08989400  |
| H | -1 | -7.31011700 | -0.95957600  | 5.99383800  |
| H | -1 | -8.00649500 | 3.34728700   | 9.99116000  |
| H | -1 | -9.27888800 | -0.75745600  | 10.07312000 |
| H | -1 | -7.79089800 | -1.16806400  | 8.11054900  |
| H | -1 | 0.61619900  | -4.67711400  | -4.18719000 |
| H | -1 | -0.64982000 | -6.42076800  | -5.46457000 |
| H | -1 | -2.50811200 | -7.83269300  | -5.16171900 |
| H | -1 | -4.03273100 | -9.48332300  | -6.26923600 |
| H | -1 | -5.54071300 | -6.27131200  | -8.68275500 |
| H | -1 | -2.76282400 | -2.08069600  | -4.65771300 |
| H | -1 | -0.42322400 | -6.03352500  | -2.32539800 |
| H | -1 | -4.73001200 | -7.33051500  | -0.39552900 |
| H | -1 | -3.34086200 | -5.62215600  | 0.79037600  |
| H | -1 | -5.99310100 | -7.48503400  | -2.39237200 |
| H | -1 | -7.35376200 | -9.21407000  | -3.60042300 |
| H | -1 | -3.70585400 | -11.33007900 | -4.39692800 |
| H | -1 | -4.88451300 | -1.34424700  | -3.67827600 |
| H | -1 | -6.35058300 | -2.91232300  | -4.96137700 |
| H | -1 | -4.95780400 | -4.15223600  | -0.43944800 |
| H | -1 | -9.51269900 | -7.59683800  | -3.41420100 |
| H | -1 | -7.63247600 | -6.75728700  | -7.18432100 |
| H | -1 | -6.29844900 | -4.98572400  | -6.02754600 |
| H | -1 | 6.42588500  | 1.69345700   | 0.32968700  |
| H | -1 | 12.78687400 | 1.80027100   | 0.73747600  |
| H | -1 | 12.74224400 | -1.86601900  | 2.97527300  |
| H | -1 | 10.28509200 | -1.53751600  | 3.30116800  |
| H | -1 | 8.54412100  | -0.35516300  | 4.23550600  |
| H | -1 | 6.06101000  | -0.06789200  | 4.22249900  |
| H | -1 | 2.27485400  | 8.05539500   | -1.80745300 |
| H | -1 | 2.73093400  | 5.86581300   | -0.67927900 |
| H | -1 | -1.15126900 | 6.14435100   | 1.11791600  |
| H | -1 | 0.87965800  | 8.88943900   | -3.52457900 |
| H | -1 | 0.12532300  | 10.96700700  | -4.70989900 |
| H | -1 | -1.79420300 | 12.18260200  | -1.06857100 |
| N | -1 | -2.10332800 | -7.21879800  | -2.52794800 |



|   |    |             |             |             |
|---|----|-------------|-------------|-------------|
| N | -1 | -3.50009100 | -9.59137100 | -3.30847000 |
| N | -1 | -2.96846600 | -3.95356800 | -5.50402400 |
| N | -1 | -4.05424200 | -5.75782600 | -7.35255600 |
| N | -1 | -6.02888100 | -4.71062400 | -2.11185000 |
| N | -1 | -8.10624200 | -6.09290900 | -3.38817100 |
| N | -1 | 10.95503900 | 1.24611300  | 1.49440100  |
| N | -1 | 8.20021000  | 1.08735600  | 1.19132700  |
| N | -1 | -0.79071100 | 10.38613200 | -0.98328900 |
| N | -1 | -0.63998400 | 7.71960900  | -0.11730100 |
| N | -1 | -5.17693000 | 1.56057800  | 6.74907000  |
| N | -1 | -7.19569300 | 2.13716900  | 8.53504500  |
| N | -1 | -3.58179100 | -1.98357700 | 7.06194000  |
| N | -1 | -4.78648500 | -1.82072000 | 9.60953600  |
| N | -1 | 7.32193000  | -3.23643500 | 2.56200400  |
| N | -1 | 9.96056300  | -4.23095500 | 2.65113900  |
| N | -1 | 7.68039700  | -2.32618100 | -1.91137600 |
| N | -1 | 10.38477900 | -2.57220600 | -2.78833900 |
| N | -1 | 0.36579100  | 8.42163300  | -6.19494600 |
| N | -1 | 0.81025000  | 6.35537300  | -4.26517400 |
| N | -1 | -3.70814900 | 6.02349500  | -3.09872000 |
| N | -1 | -4.99028900 | 8.29660200  | -4.09554700 |
| C | 0  | -0.49001000 | 2.65117800  | 4.05597500  |
| C | 0  | 1.75106800  | 0.46610100  | 5.00913500  |
| O | 0  | 0.64101200  | 0.78531800  | 5.60851600  |
| O | 0  | 2.89665500  | 0.75584700  | 5.55416700  |
| O | 0  | -1.44357400 | 3.02658600  | 4.85795200  |
| O | 0  | 0.75071000  | 2.70005600  | 4.44534100  |
| H | 0  | 2.92485800  | 1.20661400  | 6.40128700  |

Sum of electronic and thermal Free Energies = -13425.800511 (Hartree/Particle).

**Table S14:** DFT-optimized geometry of TS<sub>2</sub> (singlet), computed at the B3LYP-D3/ 6-31G\* (HCNO)/ MWB28 (Ce) level in water solvent using PCM.

| Atom |    | x           | y            | z           |
|------|----|-------------|--------------|-------------|
| Ce   | -1 | 1.39041100  | -2.20607700  | -0.59971400 |
| Ce   | 0  | -1.02586900 | 1.85942500   | 1.83282800  |
| Ce   | -1 | -1.73795400 | -1.66133600  | 1.50174800  |
| Ce   | -1 | 2.15945300  | 1.53968500   | -0.18921800 |
| Ce   | -1 | -1.25283900 | 0.40152800   | -1.45829100 |
| Ce   | 0  | 1.68476500  | -0.67027300  | 2.87356600  |
| O    | -1 | -4.69115900 | 13.05784900  | -4.68197600 |
| C    | -1 | -4.18612900 | 10.75553700  | -3.02543600 |
| C    | -1 | -3.91681900 | 9.56987900   | -2.35088600 |
| O    | -1 | -6.07315800 | -10.09127900 | -7.66301900 |
| C    | -1 | -4.01650100 | -8.44427300  | -6.57156900 |
| C    | -1 | -3.15789800 | -7.52977200  | -5.97579500 |
| O    | -1 | 14.14228500 | -3.99772800  | 0.32207400  |
| C    | -1 | 11.30574700 | -4.20371400  | 0.19663800  |
| C    | -1 | 9.91923900  | -4.15555200  | 0.23612400  |
| O    | -1 | 14.81238100 | 0.46193800   | 0.46855200  |
| C    | -1 | 12.25958600 | 1.04634800   | 1.31563700  |
| O    | -1 | -6.79575500 | 1.24307000   | 12.69814900 |
| C    | -1 | -4.74401100 | 0.72276600   | 10.78306200 |
| C    | -1 | -3.86279000 | 0.40408700   | 9.75727200  |

|   |    |              |              |             |
|---|----|--------------|--------------|-------------|
| O | -1 | -9.22812300  | -8.78646800  | -7.20763800 |
| C | -1 | -7.76524200  | -6.55647900  | -6.12841100 |
| C | -1 | -7.03724600  | -5.56362100  | -5.48409000 |
| C | -1 | -2.30160200  | 9.23310600   | -6.45621000 |
| C | -1 | -1.99040400  | 8.03879700   | -5.82106200 |
| O | -1 | -2.38582600  | 13.56109900  | -2.99531200 |
| C | -1 | -1.19497700  | 11.47570600  | -1.63584700 |
| C | -1 | 12.19358700  | -0.82319700  | -1.55599500 |
| C | -1 | 10.82636800  | -0.58579200  | -1.48958600 |
| O | -1 | -7.65302500  | -11.31303300 | -4.99314400 |
| C | -1 | -6.27917600  | -9.30908400  | -3.50403800 |
| C | -1 | -5.52357900  | -8.36246900  | -2.82513600 |
| O | -1 | -9.96666100  | 0.68567100   | 12.15063800 |
| C | -1 | -8.70720900  | 0.04817800   | 9.62530800  |
| C | -1 | -7.88238700  | -0.17293700  | 8.52928800  |
| O | -1 | 14.41137100  | -3.38703900  | -2.89414900 |
| C | -1 | 11.70141300  | -2.78719900  | -2.84475900 |
| O | -1 | -5.69985000  | -12.37163900 | -5.39071000 |
| C | -1 | -4.24137000  | -10.49398700 | -3.95494600 |
| O | -1 | -9.75684200  | 2.87486900   | 11.66147200 |
| C | -1 | -7.99194300  | 2.34018900   | 9.58317300  |
| O | -1 | -1.37659600  | 13.01744400  | -4.94202100 |
| C | -1 | -0.10890200  | 10.79873200  | -3.66644700 |
| C | -1 | 0.32517200   | 9.66034700   | -3.00001900 |
| O | -1 | 15.00684300  | -1.30945700  | 1.85333400  |
| C | -1 | 12.23575900  | -0.99439200  | 2.57787200  |
| C | -1 | 10.87288600  | -0.79811100  | 2.76988100  |
| C | -1 | 0.04921900   | 9.56672500   | -6.80527900 |
| O | -1 | -10.15146600 | -9.14757900  | -5.18498200 |
| C | -1 | -8.80653900  | -7.03535100  | -4.01976300 |
| O | -1 | -7.58133700  | -0.85538600  | 12.43694000 |
| C | -1 | -5.61570100  | -1.50764300  | 10.60495300 |
| O | -1 | 14.04757000  | -3.99694100  | 2.57875800  |
| C | -1 | 11.29179700  | -4.27813500  | 2.59550700  |
| O | -1 | -5.60156100  | 11.71631300  | -6.24578100 |
| C | -1 | -5.24619400  | 9.44019000   | -4.73036400 |
| O | -1 | -6.84306300  | -8.33980700  | -8.86439800 |
| C | -1 | -4.87153000  | -6.64858200  | -7.91428000 |
| O | -1 | 0.16294800   | -4.31394000  | -0.52485000 |
| C | -1 | -1.37465700  | -6.30600800  | -1.87878200 |
| O | -1 | -2.83100200  | 1.37825300   | 3.33234800  |
| C | -1 | -4.35917300  | 1.42969000   | 5.70481700  |
| O | -1 | 0.08594400   | 4.08161700   | 1.70852000  |
| C | -1 | 1.79437800   | 6.39126300   | -0.52849400 |
| C | -1 | 1.53458600   | 7.60144100   | -1.15866300 |
| O | -1 | 3.56810100   | -1.69443600  | -1.58610500 |
| C | -1 | 6.36513500   | -2.11527200  | -1.81427500 |
| O | -1 | -3.46857300  | -0.75095800  | 2.96202900  |
| C | -1 | -5.57201100  | -0.44780400  | 4.83825300  |
| C | -1 | -6.44774100  | -0.30800400  | 5.90796800  |
| O | -1 | 1.99913400   | 3.81103300   | 0.55147800  |
| C | -1 | -0.37794600  | 6.55570000   | 0.47708100  |
| O | -1 | 3.89665400   | 0.53088300   | -1.48337200 |
| C | -1 | 6.60689200   | 0.25798200   | -2.05372800 |
| C | -1 | 7.97669500   | 0.05556300   | -2.15396300 |
| O | -1 | -1.53500600  | -3.98843100  | 0.91966900  |
| C | -1 | -3.00672500  | -6.06927900  | -0.13859600 |
| C | -1 | -3.77706300  | -7.01299100  | -0.80248800 |
| O | -1 | -0.88569900  | -1.08046700  | -3.36434200 |
| C | -1 | -2.27720800  | -3.03614300  | -4.82753000 |

|   |    |             |             |             |
|---|----|-------------|-------------|-------------|
| O | -1 | 3.24798200  | -2.47936000 | 2.67682800  |
| C | -1 | 6.00678100  | -3.02059300 | 2.59878100  |
| O | -1 | -2.62220200 | 2.38648900  | -1.44654300 |
| C | -1 | -3.36955000 | 4.85844500  | -2.54578700 |
| O | -1 | -2.52960000 | 3.27983400  | 0.61923600  |
| C | -1 | -3.59929900 | 5.71045300  | -0.31813500 |
| C | -1 | -3.95662200 | 6.93135500  | -0.87891100 |
| O | -1 | 0.74226500  | -2.55645300 | -2.86995500 |
| C | -1 | -0.38508200 | -4.48631100 | -4.55763800 |
| C | -1 | -1.09340400 | -5.45326400 | -5.25965900 |
| O | -1 | 2.96990400  | -3.47045200 | 0.67158300  |
| C | -1 | 5.60832900  | -4.38389900 | 0.66322900  |
| C | -1 | 6.97534200  | -4.62016400 | 0.61436400  |
| O | -1 | -3.58688200 | -2.14596200 | 0.01254100  |
| C | -1 | -5.25544500 | -3.85752900 | -1.44011300 |
| O | -1 | 1.69171200  | 2.77115600  | -2.25862200 |
| C | -1 | 1.10312400  | 5.20909000  | -3.64302000 |
| O | -1 | 4.11774000  | 1.66558900  | 1.19588300  |
| C | -1 | 6.66501800  | 0.24948600  | 3.37923600  |
| C | -1 | 8.04574300  | 0.08511500  | 3.37937600  |
| O | -1 | -1.36126000 | -2.70400200 | 3.67278700  |
| C | -1 | -2.81751200 | -2.28154700 | 6.01120600  |
| O | -1 | -3.33031500 | -0.79203500 | -1.76901800 |
| C | -1 | -5.20689100 | -2.28642500 | -3.24917900 |
| C | -1 | -6.01456700 | -3.16488500 | -3.96220100 |
| O | -1 | 0.53710400  | -1.92495400 | 4.60656100  |
| C | -1 | -0.90896200 | -1.16044100 | 6.92778700  |
| C | -1 | -1.70241000 | -0.80804400 | 8.01328400  |
| O | -1 | 3.85867600  | 0.38417500  | 3.03037000  |
| C | -1 | 6.87721000  | 1.24039400  | 1.20637200  |
| O | -1 | -0.21634800 | 1.87340000  | -3.05358700 |
| C | -1 | -0.76927000 | 4.06857100  | -4.61298500 |
| C | -1 | -1.08825200 | 5.25105300  | -5.26410600 |
| O | -1 | 2.11990600  | -0.51755400 | 0.73158200  |
| O | -1 | -0.00809400 | 1.75094800  | -0.11898800 |
| O | -1 | -0.45374200 | -0.16193100 | 2.59376100  |
| O | -1 | -0.69018800 | -1.53863300 | -0.47989600 |
| O | -1 | 0.59154200  | -2.41812300 | 1.67634900  |
| O | -1 | 1.16476700  | -0.06461100 | -1.66588300 |
| O | -1 | 1.40569400  | 1.59732300  | 2.17627900  |
| O | -1 | -2.09422800 | 0.37219400  | 0.63103900  |
| C | -1 | -5.02748500 | 11.94451700 | -5.05065500 |
| C | -1 | -4.84509600 | 10.70032000 | -4.25718900 |
| C | -1 | -4.31886500 | 8.35463500  | -2.92709700 |
| C | -1 | -5.97130000 | -8.93123200 | -8.02121600 |
| C | -1 | -4.91931300 | -7.99977000 | -7.54072600 |
| C | -1 | -3.22337100 | -6.18620200 | -6.38076700 |
| C | -1 | 13.49616000 | -4.08810200 | 1.35081300  |
| C | -1 | 12.01931500 | -4.23576400 | 1.39650300  |
| C | -1 | 9.28331500  | -4.15103400 | 1.48805000  |
| C | -1 | 14.35183100 | -0.37860300 | 1.41708400  |
| C | -1 | 12.94818400 | -0.07723600 | 1.80147000  |
| C | -1 | 10.25844200 | 0.32037700  | 2.18664000  |
| C | -1 | -6.69435200 | 0.13066600  | 12.20780500 |
| C | -1 | -5.64941200 | -0.24697700 | 11.22142500 |
| C | -1 | -3.92461500 | -0.87547800 | 9.18418300  |
| C | -1 | -9.35798800 | -8.47213300 | -6.03559200 |
| C | -1 | -8.65938400 | -7.33199300 | -5.38510900 |
| C | -1 | -7.21899100 | -5.37347500 | -4.10601000 |
| C | -1 | -1.26746900 | 10.02749600 | -6.95657100 |

|   |    |              |              |             |
|---|----|--------------|--------------|-------------|
| C | -1 | -0.64069600  | 7.66667900   | -5.71251500 |
| C | -1 | -1.54598100  | 12.82340600  | -3.75137000 |
| C | -1 | -0.91233100  | 11.71892400  | -2.98786100 |
| C | -1 | -0.05815200  | 9.47991600   | -1.66117400 |
| C | -1 | 12.65356700  | -1.95327200  | -2.23657700 |
| C | -1 | 9.95128200   | -1.48495000  | -2.11986600 |
| C | -1 | -6.44389000  | -11.38105300 | -4.86157400 |
| C | -1 | -5.63410400  | -10.40039500 | -4.09234100 |
| C | -1 | -4.13215500  | -8.54281500  | -2.74664500 |
| C | -1 | -9.54865900  | 1.56978500   | 11.41733100 |
| C | -1 | -8.76343600  | 1.33147600   | 10.17981500 |
| C | -1 | -7.13275400  | 0.89666100   | 8.01180600  |
| C | -1 | -0.98171100  | -4.59060300  | -0.05247000 |
| C | -1 | -1.78098600  | -5.68408000  | -0.69104300 |
| C | -1 | -3.29975100  | -7.55378100  | -2.00607500 |
| C | -1 | -3.53622400  | 0.34768700   | 3.58175000  |
| C | -1 | -4.50779000  | 0.44684100   | 4.71505400  |
| C | -1 | -6.21571800  | 0.70589300   | 6.85074500  |
| C | -1 | 0.97811300   | 4.48738900   | 0.90937000  |
| C | -1 | 0.81104700   | 5.83718700   | 0.29580500  |
| C | -1 | 0.29607900   | 8.22571900   | -0.94358300 |
| C | -1 | 4.30268600   | -0.66362300  | -1.63721400 |
| C | -1 | 5.77182100   | -0.84608600  | -1.85825500 |
| C | -1 | 8.47998100   | -1.25135500  | -2.06037300 |
| C | -1 | -0.33088600  | -2.21349200  | -3.46671600 |
| C | -1 | -0.99032400  | -3.24975700  | -4.31497400 |
| C | -1 | -2.39371800  | -5.15635800  | -5.69814400 |
| C | -1 | 3.66915800   | -3.14792800  | 1.68165300  |
| C | -1 | 5.10536700   | -3.54745900  | 1.66388100  |
| C | -1 | 7.80419400   | -4.00511500  | 1.56609800  |
| C | -1 | -2.78758000  | 3.33636200   | -0.62313700 |
| C | -1 | -3.27945500  | 4.64421300   | -1.16300900 |
| C | -1 | -3.98425600  | 7.05563400   | -2.27656800 |
| C | -1 | -3.84470900  | -1.78999300  | -1.17796300 |
| C | -1 | -4.79805400  | -2.63855700  | -1.96009500 |
| C | -1 | -6.39541400  | -4.37671500  | -3.36484900 |
| C | -1 | 0.64082600   | 2.80675400   | -2.96824200 |
| C | -1 | 0.34068300   | 4.03963600   | -3.76402500 |
| C | -1 | -0.28411900  | 6.38032900   | -5.05111100 |
| C | -1 | 4.56988600   | 0.97505800   | 2.16160600  |
| C | -1 | 6.05428500   | 0.83192600   | 2.26565800  |
| C | -1 | 8.78168900   | 0.50944600   | 2.26168100  |
| C | -1 | -0.70786100  | -2.21130400  | 4.63806400  |
| C | -1 | -1.47282300  | -1.89858800  | 5.88467300  |
| C | -1 | -3.03885800  | -1.23448800  | 8.04236000  |
| H | -1 | 1.43811500   | -0.02839400  | -2.59672900 |
| H | -1 | 1.85396700   | 2.35583200   | 2.58138700  |
| H | -1 | 0.63249400   | -3.31342000  | 2.04933000  |
| C | -1 | 14.11225000  | -2.24366300  | -2.24783100 |
| O | -1 | 14.95777800  | -1.53307100  | -1.73255800 |
| H | -1 | 15.37696900  | -3.51459500  | -2.82776900 |
| H | -1 | -7.64423600  | -8.89936600  | -8.90451000 |
| H | -1 | -6.30240600  | -12.94791400 | -5.89827600 |
| H | -1 | -10.50693400 | -9.91972500  | -5.66520300 |
| H | -1 | 15.63475000  | 0.07976200   | 0.10610500  |
| H | -1 | -2.97035100  | 14.05518200  | -3.60365700 |
| C | -1 | -1.61128800  | 11.32867100  | -7.58748200 |
| O | -1 | -2.74940200  | 11.74542200  | -7.71033900 |
| O | -1 | -0.52918300  | 11.99893800  | -8.02921800 |
| H | -1 | -0.84341600  | 12.84614800  | -8.39838200 |

|   |    |              |              |             |
|---|----|--------------|--------------|-------------|
| H | -1 | -5.61172300  | 12.56251700  | -6.73266500 |
| H | -1 | -10.23819200 | 2.94478300   | 12.50885800 |
| H | -1 | -8.37689000  | -0.45408300  | 12.84676100 |
| H | -1 | 14.95289000  | -3.64748700  | 2.46682500  |
| H | -1 | 0.13326800   | -0.87327000  | 6.88417500  |
| H | -1 | -1.28684800  | -0.23948300  | 8.83800300  |
| H | -1 | -3.28412200  | -2.84999200  | 5.21262200  |
| H | -1 | -3.17350400  | 1.14752300   | 9.37391300  |
| H | -1 | -4.76188700  | 1.71272400   | 11.22619100 |
| H | -1 | -6.29927600  | -2.28783600  | 10.92694300 |
| H | -1 | 5.63593900   | -2.37698300  | 3.39032300  |
| H | -1 | 7.39675300   | -5.26496500  | -0.14832800 |
| H | -1 | 4.93298500   | -4.82036400  | -0.06461900 |
| H | -1 | 11.81232000  | -4.32965300  | 3.54789900  |
| H | -1 | 11.84670500  | -4.17519700  | -0.74035200 |
| H | -1 | 9.34446900   | -4.04748900  | -0.67699900 |
| H | -1 | 5.73919200   | -2.99059300  | -1.67327300 |
| H | -1 | 12.02172400  | -3.67060900  | -3.39038200 |
| H | -1 | 12.90873000  | -0.16219500  | -1.08159200 |
| H | -1 | 10.43771900  | 0.25619400   | -0.92744200 |
| H | -1 | 8.64686400   | 0.89324100   | -2.30891300 |
| H | -1 | 6.17879600   | 1.25216500   | -2.11651100 |
| H | -1 | 1.97482300   | 5.21186300   | -2.99697900 |
| H | -1 | 0.87933300   | 10.15450900  | -7.18777900 |
| H | -1 | -3.32502000  | 9.56883900   | -6.56462800 |
| H | -1 | -2.76970900  | 7.41652700   | -5.39346800 |
| H | -1 | -1.94370200  | 5.30303400   | -5.92780200 |
| H | -1 | -1.36793900  | 3.17423600   | -4.74284600 |
| H | -1 | -3.56330900  | 5.57550200   | 0.75711500  |
| H | -1 | -4.21806400  | 7.77057300   | -0.24464200 |
| H | -1 | -3.13752900  | 4.04445200   | -3.22460900 |
| H | -1 | -5.78558000  | 9.35858700   | -5.67017900 |
| H | -1 | -3.86914000  | 11.71382900  | -2.63117900 |
| H | -1 | -3.35587100  | 9.58217700   | -1.42330800 |
| H | -1 | -3.53662800  | 2.13729100   | 5.63408400  |
| H | -1 | -5.71739200  | -1.21914200  | 4.08989400  |
| H | -1 | -7.31011700  | -0.95957600  | 5.99383800  |
| H | -1 | -8.00649500  | 3.34728700   | 9.99116000  |
| H | -1 | -9.27888800  | -0.75745600  | 10.07312000 |
| H | -1 | -7.79089800  | -1.16806400  | 8.11054900  |
| H | -1 | 0.61619900   | -4.67711400  | -4.18719000 |
| H | -1 | -0.64982000  | -6.42076800  | -5.46457000 |
| H | -1 | -2.50811200  | -7.83269300  | -5.16171900 |
| H | -1 | -4.03273100  | -9.48332300  | -6.26923600 |
| H | -1 | -5.54071300  | -6.27131200  | -8.68275500 |
| H | -1 | -2.76282400  | -2.08069600  | -4.65771300 |
| H | -1 | -0.42322400  | -6.03352500  | -2.32539800 |
| H | -1 | -4.73001200  | -7.33051500  | -0.39552900 |
| H | -1 | -3.34086200  | -5.62215600  | 0.79037600  |
| H | -1 | -5.99310100  | -7.48503400  | -2.39237200 |
| H | -1 | -7.35376200  | -9.21407000  | -3.60042300 |
| H | -1 | -3.70585400  | -11.33007900 | -4.39692800 |
| H | -1 | -4.88451300  | -1.34424700  | -3.67827600 |
| H | -1 | -6.35058300  | -2.91232300  | -4.96137700 |
| H | -1 | -4.95780400  | -4.15223600  | -0.43944800 |
| H | -1 | -9.51269900  | -7.59683800  | -3.41420100 |
| H | -1 | -7.63247600  | -6.75728700  | -7.18432100 |
| H | -1 | -6.29844900  | -4.98572400  | -6.02754600 |
| H | -1 | 6.42588500   | 1.69345700   | 0.32968700  |
| H | -1 | 12.78687400  | 1.80027100   | 0.73747600  |

|   |    |             |             |             |
|---|----|-------------|-------------|-------------|
| H | -1 | 12.74224400 | -1.86601900 | 2.97527300  |
| H | -1 | 10.28509200 | -1.53751600 | 3.30116800  |
| H | -1 | 8.54412100  | -0.35516300 | 4.23550600  |
| H | -1 | 6.06101000  | -0.06789200 | 4.22249900  |
| H | -1 | 2.27485400  | 8.05539500  | -1.80745300 |
| H | -1 | 2.73093400  | 5.86581300  | -0.67927900 |
| H | -1 | -1.15126900 | 6.14435100  | 1.11791600  |
| H | -1 | 0.87965800  | 8.88943900  | -3.52457900 |
| H | -1 | 0.12532300  | 10.96700700 | -4.70989900 |
| H | -1 | -1.79420300 | 12.18260200 | -1.06857100 |
| N | -1 | -2.10332800 | -7.21879800 | -2.52794800 |
| N | -1 | -3.50009100 | -9.59137100 | -3.30847000 |
| N | -1 | -2.96846600 | -3.95356800 | -5.50402400 |
| N | -1 | -4.05424200 | -5.75782600 | -7.35255600 |
| N | -1 | -6.02888100 | -4.71062400 | -2.11185000 |
| N | -1 | -8.10624200 | -6.09290900 | -3.38817100 |
| N | -1 | 10.95503900 | 1.24611300  | 1.49440100  |
| N | -1 | 8.20021000  | 1.08735600  | 1.19132700  |
| N | -1 | -0.79071100 | 10.38613200 | -0.98328900 |
| N | -1 | -0.63998400 | 7.71960900  | -0.11730100 |
| N | -1 | -5.17693000 | 1.56057800  | 6.74907000  |
| N | -1 | -7.19569300 | 2.13716900  | 8.53504500  |
| N | -1 | -3.58179100 | -1.98357700 | 7.06194000  |
| N | -1 | -4.78648500 | -1.82072000 | 9.60953600  |
| N | -1 | 7.32193000  | -3.23643500 | 2.56200400  |
| N | -1 | 9.96056300  | -4.23095500 | 2.65113900  |
| N | -1 | 7.68039700  | -2.32618100 | -1.91137600 |
| N | -1 | 10.38477900 | -2.57220600 | -2.78833900 |
| N | -1 | 0.36579100  | 8.42163300  | -6.19494600 |
| N | -1 | 0.81025000  | 6.35537300  | -4.26517400 |
| N | -1 | -3.70814900 | 6.02349500  | -3.09872000 |
| N | -1 | -4.99028900 | 8.29660200  | -4.09554700 |
| C | 0  | -0.42358121 | 2.74932918  | 4.33157168  |
| C | 0  | 1.75106800  | 0.46610100  | 5.00913500  |
| O | 0  | 0.64101200  | 0.78531800  | 5.60851600  |
| O | 0  | 2.89665500  | 0.75584700  | 5.55416700  |
| O | 0  | -1.37714521 | 3.12473718  | 5.13354868  |
| O | 0  | 0.81713879  | 2.79820718  | 4.72093768  |
| H | 0  | 2.92485800  | 1.20661400  | 6.40128700  |

Sum of electronic and thermal Free Energies = -13425.793162 (Hartree/Particle).

**Table S15:** DFT-optimized geometry of **f-[Ce<sup>IV</sup>(COOH)-Ce<sup>IV</sup>(COOH)]** (singlet), computed at the B3LYP-D3/ 6-31G\* (HCNO)/ MWB28 (Ce) level in water solvent using PCM.

| Atom |    | x           | y           | z           |
|------|----|-------------|-------------|-------------|
| Ce   | -1 | 1.39219100  | -2.20821200 | -0.59911600 |
| Ce   | 0  | -1.02654200 | 1.85990200  | 1.82661100  |
| Ce   | -1 | -1.73705500 | -1.66164500 | 1.50056000  |
| Ce   | -1 | 2.15954300  | 1.53847900  | -0.19396600 |
| Ce   | -1 | -1.25187900 | 0.39700600  | -1.46240100 |
| Ce   | 0  | 1.68482300  | -0.66710800 | 2.87196200  |
| O    | -1 | -4.69447400 | 13.04706900 | -4.70602200 |
| C    | -1 | -4.18900000 | 10.74744100 | -3.04589400 |
| C    | -1 | -3.91940500 | 9.56290200  | -2.36949300 |

|   |    |              |              |             |
|---|----|--------------|--------------|-------------|
| O | -1 | -6.06588800  | -10.10705200 | -7.65297400 |
| C | -1 | -4.01025800  | -8.45756200  | -6.56334300 |
| C | -1 | -3.15222200  | -7.54181600  | -5.96866600 |
| O | -1 | 14.14452400  | -3.99316200  | 0.32930600  |
| C | -1 | 11.30811100  | -4.20051900  | 0.20329600  |
| C | -1 | 9.92157100   | -4.15287700  | 0.24227900  |
| O | -1 | 14.81271300  | 0.46699700   | 0.46934200  |
| C | -1 | 12.25941100  | 1.05160400   | 1.31476200  |
| O | -1 | -6.79955400  | 1.25733800   | 12.69104500 |
| C | -1 | -4.74699700  | 0.73503600   | 10.77737300 |
| C | -1 | -3.86532400  | 0.41519600   | 9.75233400  |
| O | -1 | -9.22153900  | -8.80288100  | -7.20052000 |
| C | -1 | -7.75992400  | -6.57067500  | -6.12416500 |
| C | -1 | -7.03254300  | -5.57655400  | -5.48109900 |
| C | -1 | -2.30276900  | 9.22068400   | -6.47380800 |
| C | -1 | -1.99127100  | 8.02745300   | -5.83678400 |
| O | -1 | -2.38987700  | 13.55379700  | -3.01939300 |
| C | -1 | -1.19858200  | 11.47093100  | -1.65645000 |
| C | -1 | 12.19508700  | -0.82224800  | -1.55409900 |
| C | -1 | 10.82774800  | -0.58531500  | -1.48846900 |
| O | -1 | -7.64607600  | -11.32548300 | -4.98177200 |
| C | -1 | -6.27352700  | -9.31874300  | -3.49522900 |
| C | -1 | -5.51853700  | -8.37080200  | -2.81750400 |
| O | -1 | -9.97005600  | 0.69779900   | 12.14338000 |
| C | -1 | -8.70955200  | 0.05706800   | 9.61939500  |
| C | -1 | -7.88429700  | -0.16533600  | 8.52396300  |
| O | -1 | 14.41435600  | -3.38715600  | -2.88774000 |
| C | -1 | 11.70413300  | -2.78837500  | -2.84008600 |
| O | -1 | -5.69233600  | -12.38386600 | -5.37715200 |
| C | -1 | -4.23508700  | -10.50346700 | -3.94373600 |
| O | -1 | -9.76099800  | 2.88635300   | 11.65101600 |
| C | -1 | -7.99522900  | 2.34931200   | 9.57406500  |
| O | -1 | -1.37981400  | 13.00766200  | -4.96497600 |
| C | -1 | -0.11159200  | 10.79138300  | -3.68570200 |
| C | -1 | 0.32275000   | 9.65417400   | -3.01744200 |
| O | -1 | 15.00748300  | -1.30224900  | 1.85682500  |
| C | -1 | 12.23604200  | -0.98726200  | 2.58003200  |
| C | -1 | 10.87302800  | -0.79126400  | 2.77132300  |
| C | -1 | 0.04802000   | 9.55476400   | -6.82264400 |
| O | -1 | -10.14536100 | -9.16136200  | -5.17761600 |
| C | -1 | -8.80167800  | -7.04683800  | -4.01512900 |
| O | -1 | -7.58417900  | -0.84183200  | 12.43272100 |
| C | -1 | -5.61770100  | -1.49599900  | 10.60232000 |
| O | -1 | 14.04910600  | -3.98904900  | 2.58595700  |
| C | -1 | 11.29344500  | -4.27136900  | 2.60226900  |
| O | -1 | -5.60382900  | 11.70282400  | -6.26810800 |
| C | -1 | -5.24798500  | 9.42911100   | -4.74918800 |
| O | -1 | -6.83615000  | -8.35769500  | -8.85720300 |
| C | -1 | -4.86561800  | -6.66423200  | -7.90899500 |
| O | -1 | 0.16558400   | -4.31647400  | -0.52149000 |
| C | -1 | -1.37076800  | -6.31120000  | -1.87292800 |
| O | -1 | -2.83194100  | 1.38021300   | 3.32628500  |
| C | -1 | -4.36087200  | 1.43454900   | 5.69820000  |
| O | -1 | 0.08438200   | 4.08237100   | 1.69933600  |
| C | -1 | 1.79255000   | 6.38939300   | -0.54058800 |
| C | -1 | 1.53244900   | 7.59852200   | -1.17264200 |
| O | -1 | 3.56997500   | -1.69713300  | -1.58559100 |
| C | -1 | 6.36725500   | -2.11714000  | -1.81226400 |
| O | -1 | -3.46850900  | -0.74981400  | 2.95894400  |
| C | -1 | -5.57265700  | -0.44474100  | 4.83406000  |

|   |    |             |             |             |
|---|----|-------------|-------------|-------------|
| C | -1 | -6.44877800 | -0.30371200 | 5.90329300  |
| O | -1 | 1.99804500  | 3.81086200  | 0.54329300  |
| C | -1 | -0.38015600 | 6.55442100  | 0.46406500  |
| O | -1 | 3.89756700  | 0.52847400  | -1.48607400 |
| C | -1 | 6.60809600  | 0.25585500  | -2.05518000 |
| C | -1 | 7.97801500  | 0.05385900  | -2.15468700 |
| O | -1 | -1.53295500 | -3.98952000 | 0.92201400  |
| C | -1 | -3.00347700 | -6.07255800 | -0.13360400 |
| C | -1 | -3.77321400 | -7.01758100 | -0.79632800 |
| O | -1 | -0.88352800 | -1.08767500 | -3.36612600 |
| C | -1 | -2.27376500 | -3.04611200 | -4.82682800 |
| O | -1 | 3.24885600  | -2.47583400 | 2.67840800  |
| C | -1 | 6.00790400  | -3.01603000 | 2.60202500  |
| O | -1 | -2.62207400 | 2.38141100  | -1.45403800 |
| C | -1 | -3.37011000 | 4.85141200  | -2.55719900 |
| O | -1 | -2.53048800 | 3.27787300  | 0.61043500  |
| C | -1 | -3.60090800 | 5.70664500  | -0.33089100 |
| C | -1 | -3.95856500 | 6.92656000  | -0.89359800 |
| O | -1 | 0.74489800  | -2.56224300 | -2.86903200 |
| C | -1 | -0.38111800 | -4.49508500 | -4.55418700 |
| C | -1 | -1.08881700 | -5.46337900 | -5.25498500 |
| O | -1 | 2.97181500  | -3.47003100 | 0.67455700  |
| C | -1 | 5.61062400  | -4.38238700 | 0.66838400  |
| C | -1 | 6.97775000  | -4.61815300 | 0.62029700  |
| O | -1 | -3.58531700 | -2.14926300 | 0.01150200  |
| C | -1 | -5.25271400 | -3.86369000 | -1.43911700 |
| O | -1 | 1.69193200  | 2.76666800  | -2.26534900 |
| C | -1 | 1.10275900  | 5.20228900  | -3.65356300 |
| O | -1 | 4.11734600  | 1.66726600  | 1.19155400  |
| C | -1 | 6.66453400  | 0.25548300  | 3.37780800  |
| C | -1 | 8.04532700  | 0.09168900  | 3.37862200  |
| O | -1 | -1.36060200 | -2.70091600 | 3.67326800  |
| C | -1 | -2.81775900 | -2.27558200 | 6.01060100  |
| O | -1 | -3.32876000 | -0.79788600 | -1.77199300 |
| C | -1 | -5.20425100 | -2.29526500 | -3.25050800 |
| C | -1 | -6.01133900 | -3.17512400 | -3.96247100 |
| O | -1 | 0.53714500  | -1.91968400 | 4.60646900  |
| C | -1 | -0.90996200 | -1.15231400 | 6.92610300  |
| C | -1 | -1.70389500 | -0.79863100 | 8.01082700  |
| O | -1 | 3.85824500  | 0.38848000  | 3.02786900  |
| C | -1 | 6.87698900  | 1.24323900  | 1.20353500  |
| O | -1 | -0.21550500 | 1.86693100  | -3.05956800 |
| C | -1 | -0.76885700 | 4.05954300  | -4.62240900 |
| C | -1 | -1.08812900 | 5.24092000  | -5.27539200 |
| O | -1 | 2.12056700  | -0.51740100 | 0.72988800  |
| O | -1 | -0.00811500 | 1.74894100  | -0.12472500 |
| O | -1 | -0.45380900 | -0.16007700 | 2.59073500  |
| O | -1 | -0.68872300 | -1.54145900 | -0.48093900 |
| O | -1 | 0.59270100  | -2.41719800 | 1.67701200  |
| O | -1 | 1.16598600  | -0.06843200 | -1.66854600 |
| O | -1 | 1.40502300  | 1.59932900  | 2.17120900  |
| O | -1 | -2.09390600 | 0.37043500  | 0.62670800  |
| C | -1 | -5.03022000 | 11.93304900 | -5.07314500 |
| C | -1 | -4.84756000 | 10.69011300 | -4.27776900 |
| C | -1 | -4.32076500 | 8.34663300  | -2.94401700 |
| C | -1 | -5.96440300 | -8.94749800 | -8.01287000 |
| C | -1 | -4.91295400 | -8.01488100 | -7.53344200 |
| C | -1 | -3.21812900 | -6.19887800 | -6.37566100 |
| C | -1 | 13.49811600 | -4.08227100 | 1.35797800  |
| C | -1 | 12.02131800 | -4.23048100 | 1.40342900  |



|   |    |             |              |             |
|---|----|-------------|--------------|-------------|
| C | -1 | 9.28525500  | -4.14675800  | 1.49399900  |
| C | -1 | 14.35221900 | -0.37232000  | 1.41898400  |
| C | -1 | 12.94832700 | -0.07096700  | 1.80248400  |
| C | -1 | 10.25830000 | 0.32609700   | 2.18622400  |
| C | -1 | -6.69753400 | 0.14424700   | 12.20239200 |
| C | -1 | -5.65213000 | -0.23443000  | 11.21690100 |
| C | -1 | -3.92643600 | -0.86524700  | 9.18113400  |
| C | -1 | -9.35190000 | -8.48685400  | -6.02898500 |
| C | -1 | -8.65397400 | -7.34545300  | -5.37998600 |
| C | -1 | -7.21479700 | -5.38442900  | -4.10336000 |
| C | -1 | -1.26881200 | 10.01475900  | -6.97503100 |
| C | -1 | -0.64144200 | 7.65606200   | -5.72726200 |
| C | -1 | -1.54948800 | 12.81532800  | -3.77409000 |
| C | -1 | -0.91561600 | 11.71225100  | -3.00873800 |
| C | -1 | -0.06091600 | 9.47557900   | -1.67844900 |
| C | -1 | 12.65575000 | -1.95314500  | -2.23285300 |
| C | -1 | 9.95323400  | -1.48577700  | -2.11768000 |
| C | -1 | -6.43695400 | -11.39280200 | -4.84972500 |
| C | -1 | -5.62781700 | -10.41066000 | -4.08170300 |
| C | -1 | -4.12706300 | -8.55045000  | -2.73831200 |
| C | -1 | -9.55219500 | 1.58099300   | 11.40888600 |
| C | -1 | -8.76648800 | 1.34116800   | 10.17197100 |
| C | -1 | -7.13494900 | 0.90380300   | 8.00511900  |
| C | -1 | -0.97910700 | -4.59291000  | -0.04905300 |
| C | -1 | -1.77772600 | -5.68767100  | -0.68624400 |
| C | -1 | -3.29530200 | -7.55996500  | -1.99895800 |
| C | -1 | -3.53681100 | 0.34972600   | 3.57700500  |
| C | -1 | -4.50877100 | 0.45016300   | 4.70985800  |
| C | -1 | -6.21747200 | 0.71168600   | 6.84462900  |
| C | -1 | 0.97663100  | 4.48732400   | 0.89985800  |
| C | -1 | 0.80919300  | 5.83613600   | 0.28423000  |
| C | -1 | 0.29361400  | 8.22260200   | -0.95887800 |
| C | -1 | 4.30414500  | -0.66609100  | -1.63800900 |
| C | -1 | 5.77342500  | -0.84826900  | -1.85832100 |
| C | -1 | 8.48181700  | -1.25270800  | -2.05899200 |
| C | -1 | -0.32820900 | -2.22062100  | -3.46663800 |
| C | -1 | -0.98695100 | -3.25842400  | -4.31355500 |
| C | -1 | -2.38911900 | -5.16767100  | -5.69431700 |
| C | -1 | 3.67062000  | -3.14570900  | 1.68436200  |
| C | -1 | 5.10700100  | -3.54466600  | 1.66763200  |
| C | -1 | 7.80604900  | -4.00134000  | 1.57137000  |
| C | -1 | -2.78810400 | 3.33244100   | -0.63210100 |
| C | -1 | -3.28035700 | 4.63928000   | -1.17407500 |
| C | -1 | -3.98581700 | 7.04874400   | -2.29144800 |
| C | -1 | -3.84292200 | -1.79517600  | -1.17961100 |
| C | -1 | -4.79566900 | -2.64530400  | -1.96077400 |
| C | -1 | -6.39186600 | -4.38622100  | -3.36343000 |
| C | -1 | 0.64125300  | 2.80076900   | -2.97534800 |
| C | -1 | 0.34084300  | 4.03233800   | -3.77306100 |
| C | -1 | -0.28453400 | 6.37084800   | -5.06383000 |
| C | -1 | 4.56947900  | 0.97836400   | 2.15844600  |
| C | -1 | 6.05390500  | 0.83600700   | 2.26317300  |
| C | -1 | 8.78144400  | 0.51466100   | 2.26052400  |
| C | -1 | -0.70771000 | -2.20650600  | 4.63801200  |
| C | -1 | -1.47319100 | -1.89225100  | 5.88391600  |
| C | -1 | -3.04017400 | -1.22558900  | 8.04012400  |
| H | -1 | 1.43960900  | -0.03348900  | -2.59936000 |
| H | -1 | 1.85285300  | 2.35862800   | 2.57532400  |
| H | -1 | 0.63391100  | -3.31192100  | 2.05134100  |
| C | -1 | 14.11455700 | -2.24294300  | -2.24322000 |

|   |    |              |              |             |
|---|----|--------------|--------------|-------------|
| O | -1 | 14.95962800  | -1.53123000  | -1.72874400 |
| H | -1 | 15.37998700  | -3.51420900  | -2.82086900 |
| H | -1 | -7.63707600  | -8.91764800  | -8.89672900 |
| H | -1 | -6.29449400  | -12.96114900 | -5.88404600 |
| H | -1 | -10.50035700 | -9.93437100  | -5.65679500 |
| H | -1 | 15.63535500  | 0.08462500   | 0.10772200  |
| H | -1 | -2.97441800  | 14.04672800  | -3.62865600 |
| C | -1 | -1.61297800  | 11.31484800  | -7.60798900 |
| O | -1 | -2.75122700  | 11.73094100  | -7.73182100 |
| O | -1 | -0.53101400  | 11.98490800  | -8.05038800 |
| H | -1 | -0.84548600  | 12.83143500  | -8.42091200 |
| H | -1 | -5.61419200  | 12.54829700  | -6.75625600 |
| H | -1 | -10.24264100 | 2.95733000   | 12.49814800 |
| H | -1 | -8.38002700  | -0.44025100  | 12.84169600 |
| H | -1 | 14.95431500  | -3.63938400  | 2.47378400  |
| H | -1 | 0.13216100   | -0.86477400  | 6.88238700  |
| H | -1 | -1.28882700  | -0.22866800  | 8.83482600  |
| H | -1 | -3.28388300  | -2.84541200  | 5.21272200  |
| H | -1 | -3.17622800  | 1.15834800   | 9.36808100  |
| H | -1 | -4.76542400  | 1.72564700   | 11.21902000 |
| H | -1 | -6.30105100  | -2.27599700  | 10.92526000 |
| H | -1 | 5.63654700   | -2.37139600  | 3.39249100  |
| H | -1 | 7.39966800   | -5.26391500  | -0.14130200 |
| H | -1 | 4.93568800   | -4.82021900  | -0.05902100 |
| H | -1 | 11.81369300  | -4.32124900  | 3.55489900  |
| H | -1 | 11.84934900  | -4.17317200  | -0.73356800 |
| H | -1 | 9.34704000   | -4.04641500  | -0.67118300 |
| H | -1 | 5.74163300   | -2.99251200  | -1.67015200 |
| H | -1 | 12.02498300  | -3.67246300  | -3.38429200 |
| H | -1 | 12.90980600  | -0.16024100  | -1.08046000 |
| H | -1 | 10.43857200  | 0.25734600   | -0.92770300 |
| H | -1 | 8.64788200   | 0.89158400   | -2.31067800 |
| H | -1 | 6.17960500   | 1.24976400   | -2.11957800 |
| H | -1 | 1.97425600   | 5.20639000   | -3.00725600 |
| H | -1 | 0.87800900   | 10.14232300  | -7.20576200 |
| H | -1 | -3.32629300  | 9.55582800   | -6.58304500 |
| H | -1 | -2.77045000  | 7.40549700   | -5.40850500 |
| H | -1 | -1.94339500  | 5.29155400   | -5.93943000 |
| H | -1 | -1.36711300  | 3.16476600   | -4.75112200 |
| H | -1 | -3.56519700  | 5.57331200   | 0.74456900  |
| H | -1 | -4.22055500  | 7.76661300   | -0.26066200 |
| H | -1 | -3.13753900  | 4.03650500   | -3.23473500 |
| H | -1 | -5.78704400  | 9.34588200   | -5.68904800 |
| H | -1 | -3.87253300  | 11.70645200  | -2.65296800 |
| H | -1 | -3.35875100  | 9.57681800   | -1.44176100 |
| H | -1 | -3.53860000  | 2.14238800   | 5.62666800  |
| H | -1 | -5.71748300  | -1.21725400  | 4.08680600  |
| H | -1 | -7.31090900  | -0.95551500  | 5.98986600  |
| H | -1 | -8.01032900  | 3.35701100   | 9.98054600  |
| H | -1 | -9.28103400  | -0.74813600  | 10.06823000 |
| H | -1 | -7.79226200  | -1.16104800  | 8.10673700  |
| H | -1 | 0.62012700   | -4.68491800  | -4.18314400 |
| H | -1 | -0.64476700  | -6.43100300  | -5.45831500 |
| H | -1 | -2.50256300  | -7.84325000  | -5.15393700 |
| H | -1 | -4.02614900  | -9.49616700  | -6.25946600 |
| H | -1 | -5.53471900  | -6.28838700  | -8.67824000 |
| H | -1 | -2.75983200  | -2.09061500  | -4.65858700 |
| H | -1 | -0.41930900  | -6.03898600  | -2.31965400 |
| H | -1 | -4.72615700  | -7.33489500  | -0.38919200 |
| H | -1 | -3.33808900  | -5.62419000  | 0.79459600  |

|   |    |             |              |             |
|---|----|-------------|--------------|-------------|
| H | -1 | -5.98855900 | -7.49291800  | -2.38619500 |
| H | -1 | -7.34812300 | -9.22432200  | -3.59208900 |
| H | -1 | -3.69908500 | -11.33999300 | -4.38430500 |
| H | -1 | -4.88213300 | -1.35359300  | -3.68090900 |
| H | -1 | -6.34714900 | -2.92419200  | -4.96212600 |
| H | -1 | -4.95526100 | -4.15678100  | -0.43792100 |
| H | -1 | -9.50779300 | -7.60771600  | -3.40895000 |
| H | -1 | -7.62674600 | -6.77300100  | -7.17973300 |
| H | -1 | -6.29381800 | -4.99915900  | -6.02518600 |
| H | -1 | 6.42574900  | 1.69480500   | 0.32603500  |
| H | -1 | 12.78656500 | 1.80488400   | 0.73564100  |
| H | -1 | 12.74276700 | -1.85808400  | 2.97888900  |
| H | -1 | 10.28537700 | -1.53012100  | 3.30353000  |
| H | -1 | 8.54362300  | -0.34710400  | 4.23556300  |
| H | -1 | 6.06039600  | -0.06088900  | 4.22135600  |
| H | -1 | 2.27273000  | 8.05181600   | -1.82187800 |
| H | -1 | 2.72937200  | 5.86411000   | -0.69029900 |
| H | -1 | -1.15350600 | 6.14370500   | 1.10527200  |
| H | -1 | 0.87772100  | 8.88271600   | -3.54067900 |
| H | -1 | 0.12288900  | 10.95820000  | -4.72933100 |
| H | -1 | -1.79827800 | 12.17842100  | -1.09041600 |
| N | -1 | -2.09885600 | -7.22526000  | -2.52095900 |
| N | -1 | -3.49438600 | -9.59957800  | -3.29837600 |
| N | -1 | -2.96443000 | -3.96483300  | -5.50216900 |
| N | -1 | -4.04887700 | -5.77229800  | -7.34834600 |
| N | -1 | -6.02558500 | -4.71810800  | -2.10982100 |
| N | -1 | -8.10197100 | -6.10316300  | -3.38472500 |
| N | -1 | 10.95472500 | 1.25109000   | 1.49282300  |
| N | -1 | 8.20005800  | 1.09073100   | 1.18912900  |
| N | -1 | -0.79406400 | 10.38249900  | -1.00214300 |
| N | -1 | -0.64249500 | 7.71733300   | -0.13213300 |
| N | -1 | -5.17900900 | 1.56665300   | 6.74200300  |
| N | -1 | -7.19856900 | 2.14506200   | 8.52648900  |
| N | -1 | -3.58248900 | -1.97636600  | 7.06065200  |
| N | -1 | -4.78804400 | -1.81021300  | 9.60762800  |
| N | -1 | 7.32315400  | -3.23137800  | 2.56597800  |
| N | -1 | 9.96217500  | -4.22466200  | 2.65741700  |
| N | -1 | 7.68263500  | -2.32764500  | -1.90864200 |
| N | -1 | 10.38739200 | -2.57384800  | -2.78439600 |
| N | -1 | 0.36488100  | 8.41071500   | -6.21050600 |
| N | -1 | 0.80960100  | 6.34752100   | -4.27751700 |
| N | -1 | -3.70902300 | 6.01549500   | -3.11197300 |
| N | -1 | -4.99180100 | 8.28657800   | -4.11258700 |
| C | 0  | -0.49170600 | 2.65519300   | 4.04874100  |
| C | 0  | 1.74998700  | 0.47247600   | 5.00585500  |
| O | 0  | 0.63961100  | 0.79212200   | 5.60441500  |
| O | 0  | 2.89528300  | 0.76351300   | 5.55081000  |
| O | 0  | -1.44567600 | 3.03139800   | 4.84986200  |
| O | 0  | 0.74887200  | 2.70517000   | 4.43842000  |
| H | 0  | 2.92303400  | 1.21555400   | 6.39726600  |
| H | 0  | -1.23535900 | 3.34716000   | 5.73171300  |

---

Sum of electronic and thermal Free Energies = -13426.189189 (Hartree/Particle).

**Table S16:** DFT-optimized geometry of  $f\text{-[Ce}^{\text{III}}(\text{HOOC-COOH})\text{-Ce}^{\text{IV}}]\text{-}$  (doublet), computed at the UB3LYP-D3/ 6-31G\* (HCNO)/ MWB28 (Ce) level in water solvent using PCM. The spin density plot is also shown below. (Isovalue = 0.0004)

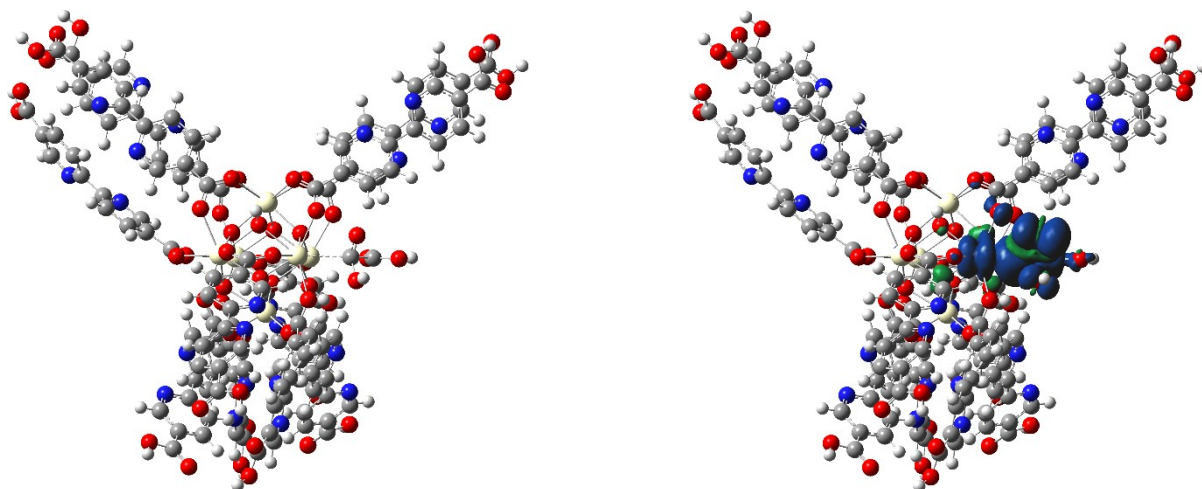

Spin Density Distribution

| Atom |    | x           | y            | z           |
|------|----|-------------|--------------|-------------|
| Ce   | -1 | 1.35400100  | -2.20129400  | -0.63861300 |
| Ce   | 0  | -1.01786500 | 1.87109900   | 1.82590300  |
| Ce   | -1 | -1.75271300 | -1.64468200  | 1.49165900  |
| Ce   | -1 | 2.14777100  | 1.53894600   | -0.22485300 |
| Ce   | -1 | -1.28188200 | 0.42348000   | -1.46698900 |
| Ce   | 0  | 1.68743300  | -0.67664600  | 2.83605000  |
| O    | -1 | -4.67669400 | 13.10769700  | -4.62650400 |
| C    | -1 | -4.17020200 | 10.79807100  | -2.98062600 |
| C    | -1 | -3.90170300 | 9.60908100   | -2.31164100 |
| O    | -1 | -6.21558500 | -10.02507200 | -7.65726100 |
| C    | -1 | -4.14017200 | -8.39265200  | -6.57948800 |
| C    | -1 | -3.27122900 | -7.48462600  | -5.98882200 |
| O    | -1 | 14.10312600 | -4.06721000  | 0.16649100  |
| C    | -1 | 11.26447900 | -4.25688100  | 0.06538900  |
| C    | -1 | 9.87866400  | -4.20102300  | 0.11716400  |
| O    | -1 | 14.79967900 | 0.38819700   | 0.31902100  |
| C    | -1 | 12.25774300 | 0.98465800   | 1.19002700  |
| O    | -1 | -6.69578500 | 1.25761800   | 12.73972600 |
| C    | -1 | -4.66386300 | 0.73099500   | 10.80533000 |
| C    | -1 | -3.79347300 | 0.41015700   | 9.77100200  |
| O    | -1 | -9.35901500 | -8.70376600  | -7.17073400 |
| C    | -1 | -7.87415700 | -6.48499900  | -6.09841400 |
| C    | -1 | -7.13494600 | -5.49801500  | -5.45784900 |
| C    | -1 | -2.32442400 | 9.27441400   | -6.43186000 |
| C    | -1 | -2.01443300 | 8.07664400   | -5.80266600 |
| O    | -1 | -2.35387300 | 13.59336200  | -2.95878500 |
| C    | -1 | -1.16297400 | 11.49760000  | -1.61540400 |
| C    | -1 | 12.15603500 | -0.87665100  | -1.68590900 |
| C    | -1 | 10.79081300 | -0.63173500  | -1.60687500 |
| O    | -1 | -7.77889500 | -11.24518600 | -4.97691100 |
| C    | -1 | -6.38075300 | -9.25306900  | -3.49455400 |
| C    | -1 | -5.61390200 | -8.31257700  | -2.81977400 |
| O    | -1 | -9.87446300 | 0.71957300   | 12.21855900 |

|   |    |              |              |             |
|---|----|--------------|--------------|-------------|
| C | -1 | -8.64079600  | 0.08188700   | 9.68058200  |
| C | -1 | -7.82686600  | -0.14087900  | 8.57678200  |
| O | -1 | 14.34748800  | -3.44928000  | -3.05032300 |
| C | -1 | 11.64150000  | -2.83433100  | -2.97555900 |
| O | -1 | -5.83529200  | -12.31368300 | -5.39442500 |
| C | -1 | -4.35370500  | -10.44819300 | -3.96648900 |
| O | -1 | -9.65656300  | 2.90888100   | 11.73343300 |
| C | -1 | -7.91298000  | 2.36994100   | 9.63831000  |
| O | -1 | -1.36481600  | 13.04934300  | -4.91572000 |
| C | -1 | -0.09856500  | 10.82006000  | -3.65725700 |
| C | -1 | 0.33488600   | 9.67743700   | -2.99771100 |
| O | -1 | 14.99624100  | -1.38803200  | 1.69729900  |
| C | -1 | 12.23343300  | -1.05934900  | 2.44695600  |
| C | -1 | 10.87342500  | -0.85592300  | 2.65143600  |
| C | -1 | 0.02509900   | 9.59574300   | -6.80064100 |
| O | -1 | -10.26663900 | -9.06518700  | -5.14103000 |
| C | -1 | -8.89964100  | -6.96374800  | -3.98200300 |
| O | -1 | -7.49547400  | -0.83566200  | 12.47980200 |
| C | -1 | -5.54967300  | -1.49397700  | 10.62890500 |
| O | -1 | 14.02818000  | -4.07204100  | 2.42391300  |
| C | -1 | 11.27111300  | -4.33776200  | 2.46408000  |
| O | -1 | -5.60832200  | 11.77557600  | -6.18584900 |
| C | -1 | -5.25257300  | 9.49336600   | -4.67970500 |
| O | -1 | -6.98606700  | -8.26602500  | -8.84714800 |
| C | -1 | -4.99676100  | -6.58852200  | -7.90983600 |
| O | -1 | 0.11534400   | -4.30241100  | -0.55862700 |
| C | -1 | -1.44529400  | -6.28209300  | -1.90434700 |
| O | -1 | -2.81249100  | 1.39601000   | 3.33990500  |
| C | -1 | -4.31951400  | 1.44958200   | 5.72581600  |
| O | -1 | 0.10536100   | 4.08732700   | 1.69779600  |
| C | -1 | 1.80717200   | 6.39340900   | -0.54792700 |
| C | -1 | 1.54871800   | 7.60674400   | -1.17255200 |
| O | -1 | 3.52582900   | -1.69923400  | -1.64269400 |
| C | -1 | 6.31833400   | -2.13518600  | -1.89651400 |
| O | -1 | -3.46530600  | -0.72856000  | 2.96949500  |
| C | -1 | -5.55048700  | -0.41868500  | 4.86490200  |
| C | -1 | -6.41601300  | -0.27687500  | 5.94262700  |
| O | -1 | 2.00678700   | 3.80913300   | 0.52329700  |
| C | -1 | -0.35529900  | 6.56733000   | 0.47710000  |
| O | -1 | 3.86784400   | 0.52391200   | -1.53689000 |
| C | -1 | 6.57139700   | 0.23731400   | -2.13172500 |
| C | -1 | 7.93910400   | 0.02746100   | -2.24451200 |
| O | -1 | -1.56802900  | -3.97128700  | 0.90159600  |
| C | -1 | -3.06069800  | -6.04092400  | -0.14928600 |
| C | -1 | -3.84214200  | -6.97847200  | -0.80891900 |
| O | -1 | -0.93982900  | -1.05535700  | -3.38014700 |
| C | -1 | -2.35513000  | -2.99917200  | -4.83630200 |
| O | -1 | 3.23861600   | -2.49396100  | 2.62076700  |
| C | -1 | 5.99352200   | -3.05050100  | 2.51707600  |
| O | -1 | -2.63984700  | 2.41607900   | -1.43791700 |
| C | -1 | -3.38280400  | 4.89519000   | -2.52394400 |
| O | -1 | -2.52411100  | 3.30325400   | 0.62935300  |
| C | -1 | -3.58821900  | 5.74240300   | -0.29209000 |
| C | -1 | -3.94353000  | 6.96682100   | -0.84644000 |
| O | -1 | 0.68403100   | -2.54182600  | -2.90401000 |
| C | -1 | -0.46894200  | -4.46069900  | -4.58690000 |
| C | -1 | -1.18883800  | -5.42173200  | -5.28526700 |
| O | -1 | 2.93739200   | -3.47800200  | 0.61539300  |
| C | -1 | 5.57043700   | -4.40626100  | 0.58145100  |
| C | -1 | 6.93561200   | -4.65008400  | 0.51996600  |

|   |    |             |              |             |
|---|----|-------------|--------------|-------------|
| O | -1 | -3.61732100 | -2.11483000  | 0.01743500  |
| C | -1 | -5.30818800 | -3.81301000  | -1.42510400 |
| O | -1 | 1.66889700  | 2.77866700   | -2.28677200 |
| C | -1 | 1.08200200  | 5.22364000   | -3.65942300 |
| O | -1 | 4.11879200  | 1.65004800   | 1.14335000  |
| C | -1 | 6.67704400  | 0.21368100   | 3.30047700  |
| C | -1 | 8.05676600  | 0.04154000   | 3.28806700  |
| O | -1 | -1.36292500 | -2.69536600  | 3.65651200  |
| C | -1 | -2.79623400 | -2.27109600  | 6.00873600  |
| O | -1 | -3.36871300 | -0.75751700  | -1.76267500 |
| C | -1 | -5.26659500 | -2.23727900  | -3.23031500 |
| C | -1 | -6.08543700 | -3.10923200  | -3.93857400 |
| O | -1 | 0.54791600  | -1.92956600  | 4.57568000  |
| C | -1 | -0.87342400 | -1.16325500  | 6.91153900  |
| C | -1 | -1.65533200 | -0.80935700  | 8.00489400  |
| O | -1 | 3.86856100  | 0.36511600   | 2.97660200  |
| C | -1 | 6.87580000  | 1.20929800   | 1.12849600  |
| O | -1 | -0.25109500 | 1.89383800   | -3.06737000 |
| C | -1 | -0.80523100 | 4.09632900   | -4.61597700 |
| C | -1 | -1.12321200 | 5.28235800   | -5.26110800 |
| O | -1 | 2.10466000  | -0.52054000  | 0.69074800  |
| O | -1 | -0.01784900 | 1.76221500   | -0.13504900 |
| O | -1 | -0.45053400 | -0.15551200  | 2.57637500  |
| O | -1 | -0.72166200 | -1.52247800  | -0.49876300 |
| O | -1 | 0.57390600  | -2.41504400  | 1.64379400  |
| O | -1 | 1.13114000  | -0.05569300  | -1.69702600 |
| O | -1 | 1.41509200  | 1.59437800   | 2.14731000  |
| O | -1 | -2.10509700 | 0.39318700   | 0.62955400  |
| C | -1 | -5.02252300 | 11.99728500  | -4.99519800 |
| C | -1 | -4.84023100 | 10.74992300  | -4.20669600 |
| C | -1 | -4.31564300 | 8.39769600   | -2.88755400 |
| C | -1 | -6.11031200 | -8.86464400  | -8.01323100 |
| C | -1 | -5.04890800 | -7.94043200  | -7.53949600 |
| C | -1 | -3.33264900 | -6.13960900  | -6.38960600 |
| C | -1 | 13.46553300 | -4.15674900  | 1.20061200  |
| C | -1 | 11.98833300 | -4.29621800  | 1.25885900  |
| C | -1 | 9.25376200  | -4.19633800  | 1.37462700  |
| C | -1 | 14.34270700 | -0.45232000  | 1.26930400  |
| C | -1 | 12.94420600 | -0.14410500  | 1.66679200  |
| C | -1 | 10.26023100 | 0.26759200   | 2.07660200  |
| C | -1 | -6.60496900 | 0.14600200   | 12.24553600 |
| C | -1 | -5.57085800 | -0.23482700  | 11.24902100 |
| C | -1 | -3.86754600 | -0.86747200  | 9.19505400  |
| C | -1 | -9.47683400 | -8.39190200  | -5.99675700 |
| C | -1 | -8.76612700 | -7.25749000  | -5.34937700 |
| C | -1 | -7.30354000 | -5.31060600  | -4.07772300 |
| C | -1 | -1.29023700 | 10.06433000  | -6.93914500 |
| C | -1 | -0.66595200 | 7.69664000   | -5.70695800 |
| C | -1 | -1.52486300 | 12.85301700  | -3.72415200 |
| C | -1 | -0.89080700 | 11.74290800  | -2.96918900 |
| C | -1 | -0.03771500 | 9.49551800   | -1.65604400 |
| C | -1 | 12.60364200 | -2.00743800  | -2.37352300 |
| C | -1 | 9.90517400  | -1.52423100  | -2.23186000 |
| C | -1 | -6.56905800 | -11.32037000 | -4.85613400 |
| C | -1 | -5.74703700 | -10.34638700 | -4.09141100 |
| C | -1 | -4.22288600 | -8.50096700  | -2.75397400 |
| C | -1 | -9.45790700 | 1.60331600   | 11.48398400 |
| C | -1 | -8.68491000 | 1.36396500   | 10.23899400 |
| C | -1 | -7.07575800 | 0.92588900   | 8.05560900  |
| C | -1 | -1.02668100 | -4.57391200  | -0.07696700 |

|   |    |              |              |             |
|---|----|--------------|--------------|-------------|
| C | -1 | -1.83768400  | -5.66112700  | -0.71143000 |
| C | -1 | -3.37845200  | -7.51865700  | -2.01808900 |
| C | -1 | -3.52131700  | 0.36875500   | 3.59272400  |
| C | -1 | -4.48234600  | 0.47028700   | 4.73476700  |
| C | -1 | -6.17001600  | 0.73312700   | 6.88604300  |
| C | -1 | 0.99277800   | 4.49024800   | 0.89194000  |
| C | -1 | 0.82798000   | 5.84263200   | 0.28347900  |
| C | -1 | 0.31569000   | 8.23739500   | -0.94494700 |
| C | -1 | 4.26575400   | -0.67243700  | -1.69748500 |
| C | -1 | 5.73184200   | -0.86256400  | -1.93189100 |
| C | -1 | 8.43579400   | -1.28252000  | -2.15883900 |
| C | -1 | -0.39234700  | -2.19120400  | -3.49041600 |
| C | -1 | -1.06503500  | -3.22142400  | -4.33562800 |
| C | -1 | -2.49124300  | -5.11631700  | -5.71153300 |
| C | -1 | 3.64727600   | -3.16217500  | 1.62015000  |
| C | -1 | 5.08099300   | -3.56973400  | 1.58871300  |
| C | -1 | 7.77623000   | -4.04230700  | 1.46603600  |
| C | -1 | -2.79263600  | 3.36462000   | -0.61055400 |
| C | -1 | -3.28181800  | 4.67668600   | -1.14258800 |
| C | -1 | -3.98269900  | 7.09506300   | -2.24346400 |
| C | -1 | -3.88354600  | -1.75417100  | -1.16980500 |
| C | -1 | -4.84848400  | -2.59522000  | -1.94581300 |
| C | -1 | -6.46788400  | -4.32052200  | -3.34114900 |
| C | -1 | 0.61205700   | 2.82211500   | -2.98704900 |
| C | -1 | 0.31193200   | 4.05883200   | -3.77686500 |
| C | -1 | -0.31087400  | 6.40650500   | -5.05215200 |
| C | -1 | 4.57546500   | 0.95435200   | 2.10321700  |
| C | -1 | 6.05988600   | 0.80258300   | 2.19386200  |
| C | -1 | 8.78528300   | 0.46476600   | 2.16509900  |
| C | -1 | -0.69832400  | -2.20898800  | 4.61733500  |
| C | -1 | -1.45056200  | -1.89536900  | 5.87143900  |
| C | -1 | -2.99386400  | -1.22834900  | 8.04454900  |
| H | -1 | 1.39652700   | -0.01847900  | -2.63013300 |
| H | -1 | 1.87117500   | 2.34924400   | 2.55049900  |
| H | -1 | 0.61306100   | -3.31157100  | 2.01400400  |
| C | -1 | 14.06050600  | -2.30600500  | -2.39834700 |
| O | -1 | 14.91451700  | -1.60159100  | -1.88861000 |
| H | -1 | 15.31289300  | -3.58245000  | -2.99275600 |
| H | -1 | -7.79071000  | -8.82095400  | -8.88172800 |
| H | -1 | -6.44551800  | -12.88517100 | -5.89822700 |
| H | -1 | -10.63065700 | -9.83400700  | -5.62018000 |
| H | -1 | 15.61666900  | 0.00238700   | -0.05164600 |
| H | -1 | -2.94089900  | 14.09238400  | -3.56065500 |
| C | -1 | -1.63220600  | 11.36913500  | -7.56353100 |
| O | -1 | -2.76897800  | 11.79262000  | -7.67528400 |
| O | -1 | -0.55023900  | 12.03450200  | -8.01294600 |
| H | -1 | -0.86289800  | 12.88447100  | -8.37707000 |
| H | -1 | -5.61796400  | 12.62314700  | -6.67035900 |
| H | -1 | -10.13007200 | 2.97919400   | 12.58519300 |
| H | -1 | -8.28512700  | -0.43100500  | 12.89765800 |
| H | -1 | 14.93444600  | -3.72738500  | 2.30497900  |
| H | -1 | 0.16999000   | -0.88183800  | 6.85955600  |
| H | -1 | -1.22935800  | -0.24539500  | 8.82745400  |
| H | -1 | -3.27302500  | -2.83472600  | 5.21275800  |
| H | -1 | -3.10337800  | 1.15074400   | 9.38360300  |
| H | -1 | -4.67226100  | 1.71982700   | 11.25124700 |
| H | -1 | -6.23480200  | -2.27118500  | 10.95478900 |
| H | -1 | 5.63327000   | -2.40697400  | 3.31356000  |
| H | -1 | 7.34667700   | -5.29516600  | -0.24811600 |
| H | -1 | 4.88628900   | -4.83693200  | -0.14161000 |

|   |    |             |              |             |
|---|----|-------------|--------------|-------------|
| H | -1 | 11.79965600 | -4.39480500  | 3.41172900  |
| H | -1 | 11.79736500 | -4.22885600  | -0.87623000 |
| H | -1 | 9.29654100  | -4.08723700  | -0.79059000 |
| H | -1 | 5.68871100  | -3.00735000  | -1.75237000 |
| H | -1 | 11.95202300 | -3.71803900  | -3.52633300 |
| H | -1 | 12.87903000 | -0.22098100  | -1.21603000 |
| H | -1 | 10.41186800 | 0.21089000   | -1.03909300 |
| H | -1 | 8.61261500  | 0.86177200   | -2.40309200 |
| H | -1 | 6.14839500  | 1.23405900   | -2.18808900 |
| H | -1 | 1.95932600  | 5.21974600   | -3.02104800 |
| H | -1 | 0.85514200  | 10.17988600  | -7.18883400 |
| H | -1 | -3.34683700 | 9.61619700   | -6.53039900 |
| H | -1 | -2.79347000 | 7.45760900   | -5.36992000 |
| H | -1 | -1.98413400 | 5.34096300   | -5.91713300 |
| H | -1 | -1.41006100 | 3.20573600   | -4.74297500 |
| H | -1 | -3.54357900 | 5.60432100   | 0.78243800  |
| H | -1 | -4.19466000 | 7.80576500   | -0.20765800 |
| H | -1 | -3.16134200 | 4.08175800   | -3.20695200 |
| H | -1 | -5.80062000 | 9.41736300   | -5.61496800 |
| H | -1 | -3.84436000 | 11.75348600  | -2.58660100 |
| H | -1 | -3.33259300 | 9.61569300   | -1.38898900 |
| H | -1 | -3.49363300 | 2.15273200   | 5.64976500  |
| H | -1 | -5.70677400 | -1.18715000  | 4.11578400  |
| H | -1 | -7.28127400 | -0.92381300  | 6.03431300  |
| H | -1 | -7.91826600 | 3.37598900   | 10.04910300 |
| H | -1 | -9.21307700 | -0.72173400  | 10.13123300 |
| H | -1 | -7.74467300 | -1.13536100  | 8.15459500  |
| H | -1 | 0.53445000  | -4.65814500  | -4.22576100 |
| H | -1 | -0.75254200 | -6.39115600  | -5.49664900 |
| H | -1 | -2.61606300 | -7.79341700  | -5.18129000 |
| H | -1 | -4.15962800 | -9.43241400  | -6.27980700 |
| H | -1 | -5.67050300 | -6.20539700  | -8.67140000 |
| H | -1 | -2.83383100 | -2.04147300  | -4.65967600 |
| H | -1 | -0.49628200 | -6.01375400  | -2.35856000 |
| H | -1 | -4.79327100 | -7.29173400  | -0.39446800 |
| H | -1 | -3.38415400 | -5.59446200  | 0.78377500  |
| H | -1 | -6.07464900 | -7.43369600  | -2.38056200 |
| H | -1 | -7.45558800 | -9.15174500  | -3.58125500 |
| H | -1 | -3.82681500 | -11.28607800 | -4.41538800 |
| H | -1 | -4.94266600 | -1.29576500  | -3.65969900 |
| H | -1 | -6.42875600 | -2.85205900  | -4.93408400 |
| H | -1 | -5.00346700 | -4.11211600  | -0.42788000 |
| H | -1 | -9.60363500 | -7.52289900  | -3.37177500 |
| H | -1 | -7.75178000 | -6.68367100  | -7.15598200 |
| H | -1 | -6.39768100 | -4.92280700  | -6.00621500 |
| H | -1 | 6.41938500  | 1.66728200   | 0.25701900  |
| H | -1 | 12.78420200 | 1.73717300   | 0.60928300  |
| H | -1 | 12.73844300 | -1.93489400  | 2.83756400  |
| H | -1 | 10.28613500 | -1.59345300  | 3.18587700  |
| H | -1 | 8.56012400  | -0.40386900  | 4.13861100  |
| H | -1 | 6.07865800  | -0.10258900  | 4.14815400  |
| H | -1 | 2.28583100  | 8.05829000   | -1.82659300 |
| H | -1 | 2.73938600  | 5.86310800   | -0.70832700 |
| H | -1 | -1.12529400 | 6.15859600   | 1.12359000  |
| H | -1 | 0.88039000  | 8.90485200   | -3.52917600 |
| H | -1 | 0.12746300  | 10.98985800  | -4.70227000 |
| H | -1 | -1.75320400 | 12.20630900  | -1.04100400 |
| N | -1 | -2.18476900 | -7.18899300  | -2.54953800 |
| N | -1 | -3.60170300 | -9.55152900  | -3.32412600 |
| N | -1 | -3.05746100 | -3.91084400  | -5.50916000 |



|   |    |             |             |             |
|---|----|-------------|-------------|-------------|
| N | -1 | -4.16956300 | -5.70391500 | -7.35292100 |
| N | -1 | -6.09228700 | -4.65990400 | -2.09231200 |
| N | -1 | -8.18852400 | -6.02698800 | -3.35405800 |
| N | -1 | 10.95596100 | 1.19127500  | 1.38076000  |
| N | -1 | 8.19773200  | 1.04885600  | 1.10143800  |
| N | -1 | -0.75917500 | 10.40399200 | -0.96933600 |
| N | -1 | -0.61594800 | 7.73431200  | -0.11184300 |
| N | -1 | -5.12734300 | 1.58222500  | 6.77754800  |
| N | -1 | -7.12709900 | 2.16530000  | 8.58269900  |
| N | -1 | -3.54958700 | -1.97169400 | 7.06692700  |
| N | -1 | -4.73098800 | -1.80900300 | 9.62541900  |
| N | -1 | 7.30705700  | -3.27364300 | 2.46818700  |
| N | -1 | 9.94070600  | -4.28324000 | 2.53151300  |
| N | -1 | 7.63148200  | -2.35323000 | -2.00571200 |
| N | -1 | 10.32664800 | -2.61208400 | -2.90701700 |
| N | -1 | 0.34052500  | 8.44722800  | -6.19617600 |
| N | -1 | 0.79017600  | 6.37324700  | -4.27591400 |
| N | -1 | -3.71964000 | 6.06363100  | -3.07076500 |
| N | -1 | -4.99758900 | 8.34662900  | -4.05022000 |
| C | 0  | 1.78552400  | 0.53593300  | 5.12990900  |
| O | 0  | 1.55405700  | -0.38755900 | 6.01702100  |
| C | 0  | 0.94494300  | 1.77802400  | 5.59522600  |
| O | 0  | 3.15256400  | 0.92172700  | 5.29502700  |
| O | 0  | 0.11105400  | 2.33564100  | 4.88969000  |
| O | 0  | 1.21830200  | 2.17911700  | 6.83639400  |
| H | 0  | 3.69157400  | 0.50223700  | 5.96963500  |
| H | 0  | 0.60784700  | 2.90683400  | 7.07576900  |

Sum of electronic and thermal Free Energies = -13426.370458 (Hartree/Particle).

**Table S17:** DFT-optimized geometry of **f-[Ce<sup>IV</sup>(OC-COOH)-Ce<sup>IV</sup>]** (doublet), computed at the UB3LYP-D3/ 6-31G\* (HCNO)/ MWB28 (Ce) level in water solvent using PCM.

| Atom |    | x           | y            | z           |
|------|----|-------------|--------------|-------------|
| Ce   | -1 | 1.37431600  | -2.23334500  | -0.56066800 |
| Ce   | 0  | -1.01006700 | 1.89292800   | 1.84106700  |
| Ce   | -1 | -1.75256700 | -1.63866600  | 1.52945900  |
| Ce   | -1 | 2.17629800  | 1.50948700   | -0.18755800 |
| Ce   | -1 | -1.24401700 | 0.38899000   | -1.45074000 |
| Ce   | 0  | 1.66285900  | -0.68755400  | 2.88149400  |
| O    | -1 | -4.56284900 | 13.04172700  | -4.81083900 |
| C    | -1 | -4.08131200 | 10.75221000  | -3.12975200 |
| C    | -1 | -3.82380800 | 9.57121200   | -2.44253500 |
| O    | -1 | -6.14846900 | -10.12360900 | -7.55522600 |
| C    | -1 | -4.07885400 | -8.48397300  | -6.47725700 |
| C    | -1 | -3.21302700 | -7.57112100  | -5.88945900 |
| O    | -1 | 14.10789000 | -4.12990000  | 0.40169900  |
| C    | -1 | 11.26982100 | -4.31165500  | 0.27346300  |
| C    | -1 | 9.88373900  | -4.25062100  | 0.31003900  |
| O    | -1 | 14.81789900 | 0.32483400   | 0.50331000  |
| C    | -1 | 12.26908300 | 0.94090200   | 1.33987900  |
| O    | -1 | -6.80242200 | 1.42660800   | 12.68660100 |
| C    | -1 | -4.75230000 | 0.86811000   | 10.78055600 |
| C    | -1 | -3.87229800 | 0.53093400   | 9.75964400  |
| O    | -1 | -9.29229300 | -8.78584100  | -7.11882200 |

|   |    |              |              |             |
|---|----|--------------|--------------|-------------|
| C | -1 | -7.81115700  | -6.55806300  | -6.06012400 |
| C | -1 | -7.07530600  | -5.56518700  | -5.42481800 |
| C | -1 | -2.20493500  | 9.17751800   | -6.54134900 |
| C | -1 | -1.90555800  | 7.98708600   | -5.89337100 |
| O | -1 | -2.25585500  | 13.54163100  | -3.12545200 |
| C | -1 | -1.08608400  | 11.45977500  | -1.74246900 |
| C | -1 | 12.19096900  | -0.95755300  | -1.51241700 |
| C | -1 | 10.82583600  | -0.70718900  | -1.45083800 |
| O | -1 | -7.74367300  | -11.30344700 | -4.87563600 |
| C | -1 | -6.35427500  | -9.29665000  | -3.40490300 |
| C | -1 | -5.59129800  | -8.34990300  | -2.73449400 |
| O | -1 | -9.97731600  | 0.89212000   | 12.13935800 |
| C | -1 | -8.71950400  | 0.21726200   | 9.62293600  |
| C | -1 | -7.89490500  | -0.02257800  | 8.53069200  |
| O | -1 | 14.38776000  | -3.55492800  | -2.82018300 |
| C | -1 | 11.68323900  | -2.93026500  | -2.78169700 |
| O | -1 | -5.79946200  | -12.38362700 | -5.25885900 |
| C | -1 | -4.32649000  | -10.50442900 | -3.84001400 |
| O | -1 | -9.74697400  | 3.07417000   | 11.62799100 |
| C | -1 | -7.98354600  | 2.50219000   | 9.55839300  |
| O | -1 | -1.24836100  | 12.96883100  | -5.06469000 |
| C | -1 | -0.00281100  | 10.75211000  | -3.76408500 |
| C | -1 | 0.41989000   | 9.61681600   | -3.08518900 |
| O | -1 | 14.99411200  | -1.43383100  | 1.90663600  |
| C | -1 | 12.22479200  | -1.08638800  | 2.62306400  |
| C | -1 | 10.86342900  | -0.87588400  | 2.81066800  |
| C | -1 | 0.14936800   | 9.48635600   | -6.88975500 |
| O | -1 | -10.22218100 | -9.11771000  | -5.09415700 |
| C | -1 | -8.86019600  | -7.00573300  | -3.94846000 |
| O | -1 | -7.60644900  | -0.66728500  | 12.44569600 |
| C | -1 | -5.64375600  | -1.35609000  | 10.62395900 |
| O | -1 | 14.00947100  | -4.10493900  | 2.65808700  |
| C | -1 | 11.25125200  | -4.36115100  | 2.67294400  |
| O | -1 | -5.48272700  | 11.69234300  | -6.36229700 |
| C | -1 | -5.15037800  | 9.42889900   | -4.82285600 |
| O | -1 | -6.90058200  | -8.37779300  | -8.77595400 |
| C | -1 | -4.91545700  | -6.69463800  | -7.83991200 |
| O | -1 | 0.12765100   | -4.32910200  | -0.46623300 |
| C | -1 | -1.42557800  | -6.32116600  | -1.80219900 |
| O | -1 | -2.82119700  | 1.42933300   | 3.32682900  |
| C | -1 | -4.35274900  | 1.51902300   | 5.69596400  |
| O | -1 | 0.12265400   | 4.08942900   | 1.68027600  |
| C | -1 | 1.85551100   | 6.36036900   | -0.57750800 |
| C | -1 | 1.60767100   | 7.56625900   | -1.22058300 |
| O | -1 | 3.55804200   | -1.75145100  | -1.54853600 |
| C | -1 | 6.35154300   | -2.19976100  | -1.76748400 |
| O | -1 | -3.47733000  | -0.69779700  | 2.97738000  |
| C | -1 | -5.58102700  | -0.35634300  | 4.84671400  |
| C | -1 | -6.45722100  | -0.19762600  | 5.91340400  |
| O | -1 | 2.03521800   | 3.78970600   | 0.52938500  |
| C | -1 | -0.31689600  | 6.55472000   | 0.42253700  |
| O | -1 | 3.90645700   | 0.47175700   | -1.46820500 |
| C | -1 | 6.61506900   | 0.16862200   | -2.03099500 |
| C | -1 | 7.98315600   | -0.04713300  | -2.12675300 |
| O | -1 | -1.56963200  | -3.97343400  | 0.97187200  |
| C | -1 | -3.05830800  | -6.05179700  | -0.06738900 |
| C | -1 | -3.83602600  | -6.99535400  | -0.72284600 |
| O | -1 | -0.88710900  | -1.11586800  | -3.34075200 |
| C | -1 | -2.29377500  | -3.07396700  | -4.78610000 |
| O | -1 | 3.22364100   | -2.48941300  | 2.72145500  |

|   |    |             |             |             |
|---|----|-------------|-------------|-------------|
| C | -1 | 5.97778400  | -3.05616500 | 2.65404900  |
| O | -1 | -2.59545900 | 2.38620300  | -1.46186000 |
| C | -1 | -3.31869100 | 4.85328500  | -2.58785200 |
| O | -1 | -2.49821600 | 3.29998000  | 0.59476800  |
| C | -1 | -3.54442200 | 5.73030200  | -0.36951400 |
| C | -1 | -3.88980500 | 6.94850900  | -0.94348000 |
| O | -1 | 0.72665900  | -2.60122500 | -2.82833000 |
| C | -1 | -0.41523900 | -4.53822500 | -4.49796600 |
| C | -1 | -1.13108800 | -5.50597300 | -5.19120200 |
| O | -1 | 2.94015000  | -3.49859300 | 0.72632100  |
| C | -1 | 5.57024900  | -4.43576300 | 0.73198000  |
| C | -1 | 6.93515700  | -4.68480400 | 0.68793400  |
| O | -1 | -3.60333100 | -2.12205900 | 0.04222700  |
| C | -1 | -5.28486400 | -3.83348300 | -1.39557100 |
| O | -1 | 1.72305600  | 2.72363200  | -2.27036400 |
| C | -1 | 1.15876000  | 5.15233400  | -3.68086500 |
| O | -1 | 4.13335700  | 1.63207400  | 1.19957700  |
| C | -1 | 6.66417400  | 0.21575400  | 3.40185900  |
| C | -1 | 8.04335900  | 0.03898300  | 3.40609700  |
| O | -1 | -1.38886100 | -2.66224500 | 3.71190800  |
| C | -1 | -2.84509600 | -2.20256300 | 6.04331500  |
| O | -1 | -3.33165000 | -0.78899100 | -1.75274300 |
| C | -1 | -5.21917700 | -2.28166000 | -3.22066700 |
| C | -1 | -6.03356100 | -3.16014300 | -3.92598900 |
| O | -1 | 0.51485000  | -1.89073700 | 4.64075500  |
| C | -1 | -0.92803500 | -1.08925300 | 6.95159500  |
| C | -1 | -1.72006000 | -0.71853500 | 8.03201800  |
| O | -1 | 3.85972700  | 0.37205200  | 3.04675200  |
| C | -1 | 6.88886100  | 1.18220400  | 1.21925700  |
| O | -1 | -0.19168200 | 1.83491600  | -3.05933600 |
| C | -1 | -0.72223500 | 4.01873700  | -4.64226400 |
| C | -1 | -1.02947800 | 5.19724700  | -5.30610700 |
| O | -1 | 2.11661500  | -0.53746200 | 0.75432200  |
| O | -1 | 0.01061800  | 1.74094800  | -0.12326200 |
| O | -1 | -0.45676800 | -0.13975900 | 2.60821000  |
| O | -1 | -0.70048100 | -1.54590500 | -0.45140000 |
| O | -1 | 0.56990600  | -2.41502300 | 1.71648800  |
| O | -1 | 1.16962400  | -0.10099300 | -1.64930000 |
| O | -1 | 1.41934800  | 1.59845200  | 2.17597100  |
| O | -1 | -2.08906100 | 0.38882100  | 0.63731700  |
| C | -1 | -4.90858600 | 11.92771400 | -5.16859300 |
| C | -1 | -4.73872200 | 10.69019500 | -4.36201500 |
| C | -1 | -4.23583800 | 8.35374400  | -3.00687300 |
| C | -1 | -6.03557300 | -8.96828800 | -7.92519900 |
| C | -1 | -4.97602700 | -8.04140800 | -7.45251700 |
| C | -1 | -3.26572400 | -6.23127400 | -6.30838900 |
| C | -1 | 13.45928400 | -4.20382300 | 1.43019100  |
| C | -1 | 11.98109400 | -4.33771800 | 1.47483400  |
| C | -1 | 9.24582200  | -4.22744600 | 1.56074300  |
| C | -1 | 14.34823300 | -0.50168200 | 1.45966400  |
| C | -1 | 12.94672900 | -0.18374800 | 1.83847900  |
| C | -1 | 10.26004900 | 0.24199700  | 2.21484600  |
| C | -1 | -6.71023900 | 0.30833000  | 12.20794000 |
| C | -1 | -5.66712100 | -0.08886800 | 11.22732800 |
| C | -1 | -3.94470700 | -0.75387800 | 9.19968300  |
| C | -1 | -9.42125100 | -8.45825600 | -5.95031100 |
| C | -1 | -8.71347300 | -7.31778100 | -5.31041400 |
| C | -1 | -7.25759800 | -5.35918200 | -4.04909200 |
| C | -1 | -1.16286300 | 9.95736200  | -7.04808200 |
| C | -1 | -0.55943700 | 7.60398800  | -5.77864200 |

|   |    |              |              |             |
|---|----|--------------|--------------|-------------|
| C | -1 | -1.42144700  | 12.78864000  | -3.87239600 |
| C | -1 | -0.79903300  | 11.68645500  | -3.09642800 |
| C | -1 | 0.03275200   | 9.45368600   | -1.74522200 |
| C | -1 | 12.64186700  | -2.09869300  | -2.18049900 |
| C | -1 | 9.94372300   | -1.60490500  | -2.07332800 |
| C | -1 | -6.53541700  | -11.38097300 | -4.74126900 |
| C | -1 | -5.71809500  | -10.39974100 | -3.98078900 |
| C | -1 | -4.20168700  | -8.54193500  | -2.65172600 |
| C | -1 | -9.55015800  | 1.76481300   | 11.39769400 |
| C | -1 | -8.76507800  | 1.50667500   | 10.16407100 |
| C | -1 | -7.13481400  | 1.03483000   | 8.00350400  |
| C | -1 | -1.02019900  | -4.59058000  | 0.00699500  |
| C | -1 | -1.82824100  | -5.68336600  | -0.62164900 |
| C | -1 | -3.36162500  | -7.55282500  | -1.91995500 |
| C | -1 | -3.53609600  | 0.40777900   | 3.58560000  |
| C | -1 | -4.50858900  | 0.52737400   | 4.71613700  |
| C | -1 | -6.21762400  | 0.82383300   | 6.84607000  |
| C | -1 | 1.01974500   | 4.47887600   | 0.87849100  |
| C | -1 | 0.86586800   | 5.82370600   | 0.25075000  |
| C | -1 | 0.37448700   | 8.20383800   | -1.01411100 |
| C | -1 | 4.30197100   | -0.72787000  | -1.60900000 |
| C | -1 | 5.76976200   | -0.92581200  | -1.82559100 |
| C | -1 | 8.47449000   | -1.35748600  | -2.01880700 |
| C | -1 | -0.34236100  | -2.25483200  | -3.43046600 |
| C | -1 | -1.00971300  | -3.29383600  | -4.26913000 |
| C | -1 | -2.42795100  | -5.20193300  | -5.63498800 |
| C | -1 | 3.64075100   | -3.17188100  | 1.73423100  |
| C | -1 | 5.07319700   | -3.58454200  | 1.72307400  |
| C | -1 | 7.76794900   | -4.06743100  | 1.63471000  |
| C | -1 | -2.75362900  | 3.34597200   | -0.64858800 |
| C | -1 | -3.23280900  | 4.65255400   | -1.20278100 |
| C | -1 | -3.91401800  | 7.05858000   | -2.34239200 |
| C | -1 | -3.85598900  | -1.77611800  | -1.15231800 |
| C | -1 | -4.81565200  | -2.62411300  | -1.92730800 |
| C | -1 | -6.42629500  | -4.36226100  | -3.31682500 |
| C | -1 | 0.67372400   | 2.76135600   | -2.98213700 |
| C | -1 | 0.38601300   | 3.98859700   | -3.79112100 |
| C | -1 | -0.21555400  | 6.32138800   | -5.10337900 |
| C | -1 | 4.57767100   | 0.94757400   | 2.17320500  |
| C | -1 | 6.06054600   | 0.79210600   | 2.28125900  |
| C | -1 | 8.78493700   | 0.44510400   | 2.28536400  |
| C | -1 | -0.73264700  | -2.16545400  | 4.67326400  |
| C | -1 | -1.49680700  | -1.83303500  | 5.91517400  |
| C | -1 | -3.06034300  | -1.13261900  | 8.06316900  |
| H | -1 | 1.44482300   | -0.07685700  | -2.57999900 |
| H | -1 | 1.87369800   | 2.35690700   | 2.57388500  |
| H | -1 | 0.60183900   | -3.30628200  | 2.09838700  |
| C | -1 | 14.09789000  | -2.40229100  | -2.18621900 |
| O | -1 | 14.94893700  | -1.69404300  | -1.67683600 |
| H | -1 | 15.35205900  | -3.69047000  | -2.75081000 |
| H | -1 | -7.70669700  | -8.93051000  | -8.81168200 |
| H | -1 | -6.40635200  | -12.95967600 | -5.76149900 |
| H | -1 | -10.58380100 | -9.89155000  | -5.56700000 |
| H | -1 | 15.63738600  | -0.06844700  | 0.14625900  |
| H | -1 | -2.83490200  | 14.03463600  | -3.73987900 |
| C | -1 | -1.49390500  | 11.25498600  | -7.69298500 |
| O | -1 | -2.62801500  | 11.68066400  | -7.82211600 |
| O | -1 | -0.40508000  | 11.91089400  | -8.13973300 |
| H | -1 | -0.71105800  | 12.75703500  | -8.51816500 |
| H | -1 | -5.48446200  | 12.53352700  | -6.85790500 |

|   |    |              |              |             |
|---|----|--------------|--------------|-------------|
| H | -1 | -10.22906900 | 3.15716500   | 12.47377300 |
| H | -1 | -8.39902800  | -0.25463000  | 12.84997000 |
| H | -1 | 14.91808700  | -3.76481600  | 2.54412700  |
| H | -1 | 0.11681000   | -0.81193200  | 6.90683600  |
| H | -1 | -1.30075100  | -0.14524200  | 8.85154600  |
| H | -1 | -3.31549500  | -2.77501200  | 5.24983100  |
| H | -1 | -3.17571200  | 1.26414000   | 9.36983100  |
| H | -1 | -4.76198300  | 1.86271700   | 11.21341300 |
| H | -1 | -6.33486300  | -2.12673600  | 10.95279300 |
| H | -1 | 5.61145300   | -2.40110000  | 3.43826100  |
| H | -1 | 7.35199600   | -5.34121700  | -0.06733000 |
| H | -1 | 4.89219900   | -4.87363600  | 0.00750200  |
| H | -1 | 11.76972100  | -4.40750100  | 3.62672100  |
| H | -1 | 11.81255600  | -4.29768900  | -0.66283000 |
| H | -1 | 9.31147100   | -4.14683500  | -0.60514900 |
| H | -1 | 5.71750900   | -3.06791300  | -1.61854500 |
| H | -1 | 11.99647500  | -3.82211100  | -3.31761700 |
| H | -1 | 12.91125700  | -0.29814000  | -1.04361800 |
| H | -1 | 10.44386500  | 0.14402300   | -0.89809100 |
| H | -1 | 8.66109900   | 0.78283800   | -2.28917400 |
| H | -1 | 6.19605100   | 1.16591300   | -2.10477900 |
| H | -1 | 2.02938400   | 5.15394700   | -3.03337300 |
| H | -1 | 0.98537300   | 10.06266700  | -7.27685600 |
| H | -1 | -3.22510700  | 9.52130200   | -6.65500600 |
| H | -1 | -2.69114000  | 7.37630200   | -5.46073400 |
| H | -1 | -1.88333200  | 5.25005800   | -5.97179000 |
| H | -1 | -1.32872400  | 3.12852800   | -4.76392900 |
| H | -1 | -3.51141900  | 5.60615400   | 0.70713200  |
| H | -1 | -4.14471800  | 7.79655300   | -0.31836200 |
| H | -1 | -3.09289800  | 4.03026700   | -3.25783400 |
| H | -1 | -5.68892900  | 9.34244100   | -5.76271500 |
| H | -1 | -3.75635000  | 11.71163700  | -2.74485400 |
| H | -1 | -3.26429800  | 9.58805300   | -1.51416000 |
| H | -1 | -3.52374700  | 2.21842900   | 5.61936200  |
| H | -1 | -5.73212100  | -1.13403600  | 4.10610200  |
| H | -1 | -7.32557300  | -0.84049300  | 6.00449300  |
| H | -1 | -7.98969600  | 3.51354000   | 9.95594000  |
| H | -1 | -9.29915500  | -0.57852800  | 10.07804200 |
| H | -1 | -7.81169700  | -1.02276200  | 8.12240500  |
| H | -1 | 0.58367100   | -4.73418600  | -4.12382900 |
| H | -1 | -0.69590300  | -6.47949300  | -5.38534500 |
| H | -1 | -2.56733800  | -7.87144400  | -5.07117200 |
| H | -1 | -4.10494300  | -9.51965500  | -6.16424600 |
| H | -1 | -5.57994800  | -6.31932700  | -8.61340200 |
| H | -1 | -2.77104000  | -2.11248700  | -4.62699600 |
| H | -1 | -0.47099500  | -6.06188000  | -2.24994700 |
| H | -1 | -4.79246600  | -7.30007300  | -0.31428900 |
| H | -1 | -3.38993200  | -5.59211000  | 0.85633600  |
| H | -1 | -6.05360700  | -7.46385600  | -2.31162400 |
| H | -1 | -7.42780200  | -9.19297900  | -3.50413200 |
| H | -1 | -3.79780200  | -11.34982600 | -4.27241400 |
| H | -1 | -4.88761800  | -1.34690500  | -3.65890200 |
| H | -1 | -6.36564300  | -2.91491000  | -4.92830100 |
| H | -1 | -4.99153800  | -4.12049800  | -0.39140100 |
| H | -1 | -9.57238300  | -7.55455800  | -3.33836400 |
| H | -1 | -7.67846900  | -6.77095900  | -7.11367300 |
| H | -1 | -6.33043700  | -4.99960400  | -5.97292400 |
| H | -1 | 6.44308100   | 1.63022200   | 0.33716000  |
| H | -1 | 12.80409400  | 1.68403600   | 0.75488600  |
| H | -1 | 12.72274700  | -1.95838000  | 3.03031900  |

|   |    |             |             |             |
|---|----|-------------|-------------|-------------|
| H | -1 | 10.26812200 | -1.60444200 | 3.34853300  |
| H | -1 | 8.53634000  | -0.39688800 | 4.26759100  |
| H | -1 | 6.05594200  | -0.08744700 | 4.24730200  |
| H | -1 | 2.35306600  | 8.00680600  | -1.87273500 |
| H | -1 | 2.78754100  | 5.82498800  | -0.72123300 |
| H | -1 | -1.09494800 | 6.15698600  | 1.06623700  |
| H | -1 | 0.96826900  | 8.83557100  | -3.60080000 |
| H | -1 | 0.23463900  | 10.90747900 | -4.80880800 |
| H | -1 | -1.67984900 | 12.17785500 | -1.18356200 |
| N | -1 | -2.16137400 | -7.23402600 | -2.44317700 |
| N | -1 | -3.57817300 | -9.60188200 | -3.20160100 |
| N | -1 | -2.99215700 | -3.99208000 | -5.45429100 |
| N | -1 | -4.09110100 | -5.80550900 | -7.28599100 |
| N | -1 | -6.06484900 | -4.68648500 | -2.05981100 |
| N | -1 | -8.15247600 | -6.06315000 | -3.32541000 |
| N | -1 | 10.96609600 | 1.15422800  | 1.51430300  |
| N | -1 | 8.21045200  | 1.01712700  | 1.20809400  |
| N | -1 | -0.69272700 | 10.37341100 | -1.07800000 |
| N | -1 | -0.56745800 | 7.71473200  | -0.18428000 |
| N | -1 | -5.17101100 | 1.66804500  | 6.73738600  |
| N | -1 | -7.18743400 | 2.28119400  | 8.51380300  |
| N | -1 | -3.60838900 | -1.88689000 | 7.08958800  |
| N | -1 | -4.81575800 | -1.68688400 | 9.63326900  |
| N | -1 | 7.29099200  | -3.28419300 | 2.62178900  |
| N | -1 | 9.92040900  | -4.30142800 | 2.72577100  |
| N | -1 | 7.66501000  | -2.42348100 | -1.86011700 |
| N | -1 | 10.36850600 | -2.70286800 | -2.72978900 |
| N | -1 | 0.45460500  | 8.34483200  | -6.26708700 |
| N | -1 | 0.87725100  | 6.29471500  | -4.31532400 |
| N | -1 | -3.64586900 | 6.01555700  | -3.15336700 |
| N | -1 | -4.90583300 | 8.28968000  | -4.17582600 |
| C | 0  | 1.82749300  | 2.61544600  | 5.23344500  |
| O | 0  | 2.55977500  | 3.53703900  | 5.26533900  |
| C | 0  | 0.34484800  | 2.42639200  | 5.34330200  |
| O | 0  | -0.36946500 | 2.58078000  | 4.36641000  |
| O | 0  | -0.01268200 | 1.91359700  | 6.51062900  |
| H | 0  | -0.95630100 | 1.65016100  | 6.47718100  |

Sum of electronic and thermal Free Energies = -13350.372871 (Hartree/Particle).

**Table S18:** DFT-optimized geometry of  $f\text{-[Ce}^{\text{III}}(\text{OC-COOH})\text{-Ce}^{\text{IV}}\text{]}^-$  (singlet), computed at the B3LYP-D3/ 6-31G\* (HCNO)/ MWB28 (Ce) level in water solvent using PCM.

| Atom |    | x           | y            | z           |
|------|----|-------------|--------------|-------------|
| Ce   | -1 | 1.39364900  | -2.19697000  | -0.59351200 |
| Ce   | 0  | -0.98858500 | 1.84683700   | 1.88401500  |
| Ce   | -1 | -1.73900100 | -1.65381400  | 1.50196600  |
| Ce   | -1 | 2.16662100  | 1.54664800   | -0.17100900 |
| Ce   | -1 | -1.24412400 | 0.41643600   | -1.45129300 |
| Ce   | 0  | 1.69302100  | -0.65728600  | 2.94047500  |
| O    | -1 | -4.65814900 | 13.08597900  | -4.64875500 |
| C    | -1 | -4.16009000 | 10.77851600  | -2.99727900 |
| C    | -1 | -3.89394500 | 9.59067700   | -2.32531400 |
| O    | -1 | -6.06338400 | -10.05313200 | -7.69597100 |
| C    | -1 | -4.00717800 | -8.41180600  | -6.59515500 |

|   |    |              |              |             |
|---|----|--------------|--------------|-------------|
| C | -1 | -3.14880000  | -7.50005700  | -5.99485500 |
| O | -1 | 14.14092900  | -4.00791700  | 0.35377100  |
| C | -1 | 11.30443000  | -4.20982400  | 0.22102100  |
| C | -1 | 9.91789600   | -4.15994300  | 0.25733500  |
| O | -1 | 14.81652000  | 0.45044800   | 0.51396100  |
| C | -1 | 12.26248000  | 1.03592000   | 1.35655000  |
| O | -1 | -6.81968100  | 1.22685500   | 12.69414100 |
| C | -1 | -4.76405900  | 0.70904800   | 10.78253900 |
| C | -1 | -3.88081200  | 0.39199300   | 9.75798800  |
| O | -1 | -9.21771200  | -8.74540500  | -7.24456200 |
| C | -1 | -7.75448700  | -6.52028300  | -6.15579800 |
| C | -1 | -7.02672900  | -5.53013800  | -5.50705000 |
| C | -1 | -2.26938300  | 9.26292100   | -6.42767900 |
| C | -1 | -1.96126800  | 8.06648300   | -5.79504000 |
| O | -1 | -2.35618700  | 13.58161200  | -2.95524400 |
| C | -1 | -1.17131900  | 11.49097000  | -1.59861800 |
| C | -1 | 12.20088000  | -0.82573600  | -1.52030100 |
| C | -1 | 10.83381800  | -0.58671100  | -1.45650300 |
| O | -1 | -7.65121500  | -11.28004500 | -5.03319600 |
| C | -1 | -6.27829500  | -9.28195600  | -3.53538200 |
| C | -1 | -5.52307900  | -8.33818400  | -2.85211300 |
| O | -1 | -9.99000000  | 0.67512300   | 12.13756700 |
| C | -1 | -8.72536500  | 0.04282800   | 9.61352100  |
| C | -1 | -7.89822200  | -0.17639800  | 8.51887200  |
| O | -1 | 14.41848500  | -3.38885600  | -2.86013100 |
| C | -1 | 11.70920600  | -2.78558300  | -2.81556500 |
| O | -1 | -5.69848600  | -12.34014100 | -5.42898400 |
| C | -1 | -4.24097500  | -10.46831600 | -3.98465400 |
| O | -1 | -9.77614400  | 2.86536200   | 11.65485300 |
| C | -1 | -8.00699600  | 2.33400000   | 9.57931700  |
| O | -1 | -1.34303000  | 13.04191300  | -4.90101500 |
| C | -1 | -0.08129200  | 10.81807900  | -3.62845900 |
| C | -1 | 0.34969800   | 9.67731800   | -2.96409400 |
| O | -1 | 15.00535500  | -1.32495300  | 1.89438400  |
| C | -1 | 12.23296700  | -1.00820500  | 2.61317500  |
| C | -1 | 10.86989900  | -0.81065000  | 2.80247000  |
| C | -1 | 0.08269900   | 9.59438700   | -6.77024100 |
| O | -1 | -10.14635000 | -9.11078800  | -5.22509900 |
| C | -1 | -8.80143700  | -7.00350500  | -4.05094500 |
| O | -1 | -7.60738800  | -0.86984700  | 12.42536100 |
| C | -1 | -5.63824500  | -1.51971800  | 10.59629500 |
| O | -1 | 14.04083300  | -4.01313000  | 2.61021700  |
| C | -1 | 11.28466100  | -4.29073700  | 2.61963800  |
| O | -1 | -5.56657600  | 11.74989300  | -6.21836300 |
| C | -1 | -5.21780900  | 9.46919900   | -4.70829400 |
| O | -1 | -6.82812400  | -8.29739200  | -8.89441700 |
| C | -1 | -4.85664700  | -6.61135200  | -7.93501400 |
| O | -1 | 0.16324800   | -4.30341000  | -0.52729900 |
| C | -1 | -1.37373300  | -6.28976800  | -1.89029700 |
| O | -1 | -2.83242700  | 1.38223300   | 3.33821000  |
| C | -1 | -4.36618300  | 1.42924500   | 5.70716500  |
| O | -1 | 0.09192600   | 4.08614900   | 1.72868600  |
| C | -1 | 1.80871800   | 6.39960500   | -0.49796900 |
| C | -1 | 1.55201600   | 7.61183100   | -1.12546500 |
| O | -1 | 3.57435500   | -1.68552400  | -1.57332000 |
| C | -1 | 6.37137100   | -2.10942400  | -1.79597000 |
| O | -1 | -3.47190400  | -0.74512300  | 2.96059000  |
| C | -1 | -5.57941100  | -0.44429000  | 4.83261600  |
| C | -1 | -6.45750600  | -0.30624100  | 5.90061900  |
| O | -1 | 2.00751400   | 3.81618600   | 0.57547300  |

|   |    |             |             |             |
|---|----|-------------|-------------|-------------|
| C | -1 | -0.36578100 | 6.56417400  | 0.50287300  |
| O | -1 | 3.90558000  | 0.53907400  | -1.46375800 |
| C | -1 | 6.61681000  | 0.26415100  | -2.02839800 |
| C | -1 | 7.98658200  | 0.06020000  | -2.12591900 |
| O | -1 | -1.53771800 | -3.97958500 | 0.91405100  |
| C | -1 | -3.00963500 | -6.05561200 | -0.15336600 |
| C | -1 | -3.77962500 | -6.99650300 | -0.82165300 |
| O | -1 | -0.87438300 | -1.06086300 | -3.36048400 |
| C | -1 | -2.26496100 | -3.01072500 | -4.83229000 |
| O | -1 | 3.24304100  | -2.48159200 | 2.68669000  |
| C | -1 | 6.00130600  | -3.02624600 | 2.61374300  |
| O | -1 | -2.61090800 | 2.40316100  | -1.43741200 |
| C | -1 | -3.35238900 | 4.87907300  | -2.53171200 |
| O | -1 | -2.52206200 | 3.29077300  | 0.63100100  |
| C | -1 | -3.58633400 | 5.72533400  | -0.30230600 |
| C | -1 | -3.94071700 | 6.94822400  | -0.86061200 |
| O | -1 | 0.75046100  | -2.54032900 | -2.86623300 |
| C | -1 | -0.37538700 | -4.46411200 | -4.56183400 |
| C | -1 | -1.08329900 | -5.42822200 | -5.26816500 |
| O | -1 | 2.96844600  | -3.46687100 | 0.67810300  |
| C | -1 | 5.60568400  | -4.38376700 | 0.67355000  |
| C | -1 | 6.97249900  | -4.62170000 | 0.62730000  |
| O | -1 | -3.58500700 | -2.13195900 | 0.00704900  |
| C | -1 | -5.25234300 | -3.83737700 | -1.45422000 |
| O | -1 | 1.70543200  | 2.78434600  | -2.23816700 |
| C | -1 | 1.12334500  | 5.22680100  | -3.61733300 |
| O | -1 | 4.12176200  | 1.66621100  | 1.21908900  |
| C | -1 | 6.66196700  | 0.24083300  | 3.40464600  |
| C | -1 | 8.04247100  | 0.07464300  | 3.40762800  |
| O | -1 | -1.36885400 | -2.70286300 | 3.67105500  |
| C | -1 | -2.83012400 | -2.28483800 | 6.00713800  |
| O | -1 | -3.32241600 | -0.77354100 | -1.77020800 |
| C | -1 | -5.19741400 | -2.26143400 | -3.25889000 |
| C | -1 | -6.00453800 | -3.13689100 | -3.97621800 |
| O | -1 | 0.52829600  | -1.92885500 | 4.61146100  |
| C | -1 | -0.92229800 | -1.16873900 | 6.93130500  |
| C | -1 | -1.71787000 | -0.81824500 | 8.01586400  |
| O | -1 | 3.85664400  | 0.38016600  | 3.04946500  |
| C | -1 | 6.88063900  | 1.23735400  | 1.23499400  |
| O | -1 | -0.20190200 | 1.89126600  | -3.04011100 |
| C | -1 | -0.74822400 | 4.09138700  | -4.59485000 |
| C | -1 | -1.06410200 | 5.27605100  | -5.24351400 |
| O | -1 | 2.12218100  | -0.51302900 | 0.74410100  |
| O | -1 | -0.00080900 | 1.76057500  | -0.10536700 |
| O | -1 | -0.45543300 | -0.15907100 | 2.60110500  |
| O | -1 | -0.68635300 | -1.52711300 | -0.47683600 |
| O | -1 | 0.58907600  | -2.41414000 | 1.68005700  |
| O | -1 | 1.17335700  | -0.05232300 | -1.65439200 |
| O | -1 | 1.40729900  | 1.59885900  | 2.19283500  |
| O | -1 | -2.09053200 | 0.38254000  | 0.63594000  |
| C | -1 | -4.99505300 | 11.97409600 | -5.02125700 |
| C | -1 | -4.81618900 | 10.72751100 | -4.23074400 |
| C | -1 | -4.29620800 | 8.37753300  | -2.90578100 |
| C | -1 | -5.95915100 | -8.89225200 | -8.05077200 |
| C | -1 | -4.90709200 | -7.96348400 | -7.56524800 |
| C | -1 | -3.21154500 | -6.15530700 | -6.39633000 |
| C | -1 | 13.49223400 | -4.10023100 | 1.38071900  |
| C | -1 | 12.01509100 | -4.24607000 | 1.42249000  |
| C | -1 | 9.27899500  | -4.15798500 | 1.50775000  |
| C | -1 | 14.35260700 | -0.39205600 | 1.45910700  |



|   |    |             |              |             |
|---|----|-------------|--------------|-------------|
| C | -1 | 12.94844400 | -0.08988400  | 1.84096700  |
| C | -1 | 10.25831500 | 0.31022500   | 2.22080800  |
| C | -1 | -6.71856700 | 0.11565400   | 12.20101900 |
| C | -1 | -5.67177300 | -0.26068700  | 11.21610800 |
| C | -1 | -3.94294800 | -0.88592900  | 9.18127900  |
| C | -1 | -9.34996100 | -8.43408300  | -6.07197900 |
| C | -1 | -8.65141600 | -7.29663300  | -5.41673800 |
| C | -1 | -7.21151100 | -5.34349400  | -4.12889500 |
| C | -1 | -1.23301900 | 10.05730200  | -6.92341500 |
| C | -1 | -0.61231100 | 7.69229400   | -5.68429000 |
| C | -1 | -1.51550900 | 12.84486800  | -3.71130200 |
| C | -1 | -0.88513100 | 11.73748400  | -2.94929000 |
| C | -1 | -0.03705500 | 9.49375900   | -1.62666100 |
| C | -1 | 12.66099900 | -1.95456500  | -2.20285400 |
| C | -1 | 9.95906000  | -1.48300000  | -2.09130700 |
| C | -1 | -6.44248700 | -11.35001400 | -4.89893200 |
| C | -1 | -5.63325300 | -10.37251600 | -4.12511000 |
| C | -1 | -4.13208400 | -8.52057600  | -2.77079900 |
| C | -1 | -9.56909100 | 1.56067200   | 11.40766300 |
| C | -1 | -8.78123200 | 1.32468900   | 10.17137800 |
| C | -1 | -7.14595500 | 0.89361200   | 8.00608500  |
| C | -1 | -0.98289600 | -4.57984500  | -0.05839900 |
| C | -1 | -1.78207800 | -5.67053000  | -0.70184300 |
| C | -1 | -3.30015200 | -7.53465300  | -2.02556400 |
| C | -1 | -3.53959300 | 0.35192400   | 3.58313100  |
| C | -1 | -4.51372800 | 0.44928200   | 4.71438300  |
| C | -1 | -6.22640300 | 0.70478700   | 6.84669700  |
| C | -1 | 0.98653000  | 4.49291300   | 0.93276800  |
| C | -1 | 0.82269700  | 5.84459000   | 0.32247700  |
| C | -1 | 0.31381900  | 8.23715400   | -0.91163900 |
| C | -1 | 4.31041100  | -0.65554500  | -1.61987800 |
| C | -1 | 5.77982800  | -0.83934200  | -1.83791500 |
| C | -1 | 8.48792900  | -1.24762900  | -2.03468300 |
| C | -1 | -0.32081200 | -2.19433600  | -3.46461500 |
| C | -1 | -0.97958400 | -3.22742500  | -4.31725300 |
| C | -1 | -2.38217400 | -5.12841400  | -5.70893700 |
| C | -1 | 3.66571200  | -3.14801200  | 1.69070800  |
| C | -1 | 5.10143400  | -3.54938400  | 1.67527100  |
| C | -1 | 7.79988400  | -4.01032900  | 1.58267300  |
| C | -1 | -2.77700300 | 3.35101200   | -0.61182500 |
| C | -1 | -3.26587400 | 4.66097000   | -1.14931000 |
| C | -1 | -3.96485500 | 7.07633200   | -2.25798900 |
| C | -1 | -3.83952700 | -1.77242000  | -1.18309400 |
| C | -1 | -4.79211500 | -2.61760200  | -1.96979700 |
| C | -1 | -6.38839800 | -4.34983500  | -3.38306900 |
| C | -1 | 0.65628900  | 2.82325400   | -2.95018800 |
| C | -1 | 0.35966200  | 4.05868600   | -3.74333100 |
| C | -1 | -0.25899900 | 6.40368500   | -5.02553600 |
| C | -1 | 4.57069800  | 0.97246600   | 2.18400600  |
| C | -1 | 6.05465600  | 0.82709700   | 2.29120400  |
| C | -1 | 8.78163600  | 0.50103500   | 2.29284600  |
| C | -1 | -0.71711400 | -2.21364900  | 4.63922000  |
| C | -1 | -1.48463700 | -1.90330900  | 5.88485000  |
| C | -1 | -3.05494200 | -1.24300500  | 8.04059800  |
| H | -1 | 1.44897200  | -0.01394000  | -2.58448300 |
| H | -1 | 1.85559700  | 2.35567300   | 2.60106800  |
| H | -1 | 0.62796500  | -3.31049900  | 2.05070100  |
| C | -1 | 14.11932300 | -2.24684600  | -2.21142300 |
| O | -1 | 14.96455000 | -1.53876900  | -1.69220800 |
| H | -1 | 15.38375400 | -3.51786300  | -2.79179800 |

|   |    |              |              |             |
|---|----|--------------|--------------|-------------|
| H | -1 | -7.62993200  | -8.85578500  | -8.93795700 |
| H | -1 | -6.30058600  | -12.91424200 | -5.93954800 |
| H | -1 | -10.50168300 | -9.88115900  | -5.70826100 |
| H | -1 | 15.63924900  | 0.06817400   | 0.15243800  |
| H | -1 | -2.93861100  | 14.07811300  | -3.56363500 |
| C | -1 | -1.57362600  | 11.36063700  | -7.55160600 |
| O | -1 | -2.71089700  | 11.77921900  | -7.67604000 |
| O | -1 | -0.48959300  | 12.03067400  | -7.98894100 |
| H | -1 | -0.80183300  | 12.87929600  | -8.35654800 |
| H | -1 | -5.57446700  | 12.59742800  | -6.70296900 |
| H | -1 | -10.25942200 | 2.93361100   | 12.50127700 |
| H | -1 | -8.40339000  | -0.46861000  | 12.83437500 |
| H | -1 | 14.94687500  | -3.66456600  | 2.50139000  |
| H | -1 | 0.12040800   | -0.88282500  | 6.89095600  |
| H | -1 | -1.30353100  | -0.25247300  | 8.84311100  |
| H | -1 | -3.29557300  | -2.85049800  | 5.20590500  |
| H | -1 | -3.18964000  | 1.13555800   | 9.37829300  |
| H | -1 | -4.78169300  | 1.69782300   | 11.22831200 |
| H | -1 | -6.32360800  | -2.29988100  | 10.91453400 |
| H | -1 | 5.62942100   | -2.38429900  | 3.40614500  |
| H | -1 | 7.39488200   | -5.26498300  | -0.13613600 |
| H | -1 | 4.93150600   | -4.81736500  | -0.05708700 |
| H | -1 | 11.80284300  | -4.34552500  | 3.57312400  |
| H | -1 | 11.84765900  | -4.17947600  | -0.71459800 |
| H | -1 | 9.34544800   | -4.04864400  | -0.65685700 |
| H | -1 | 5.74394700   | -2.98429900  | -1.65883800 |
| H | -1 | 12.02965900  | -3.66793000  | -3.36282200 |
| H | -1 | 12.91575500  | -0.16696600  | -1.04240200 |
| H | -1 | 10.44493400  | 0.25425800   | -0.89300100 |
| H | -1 | 8.65821600   | 0.89741100   | -2.27699600 |
| H | -1 | 6.19016800   | 1.25906400   | -2.08949800 |
| H | -1 | 1.99350300   | 5.22667300   | -2.96921300 |
| H | -1 | 0.91449300   | 10.18211300  | -7.14916500 |
| H | -1 | -3.29209900  | 9.60029500   | -6.53762200 |
| H | -1 | -2.74240500  | 7.44408200   | -5.37099500 |
| H | -1 | -1.91789800  | 5.33096100   | -5.90910100 |
| H | -1 | -1.34775400  | 3.19819800   | -4.72856600 |
| H | -1 | -3.55308600  | 5.58741800   | 0.77265500  |
| H | -1 | -4.20257000  | 7.78606000   | -0.22469000 |
| H | -1 | -3.11981800  | 4.06662100   | -3.21218900 |
| H | -1 | -5.75505800  | 9.39085800   | -5.64960900 |
| H | -1 | -3.84278600  | 11.73531600  | -2.59966500 |
| H | -1 | -3.33519400  | 9.59972000   | -1.39637300 |
| H | -1 | -3.54254500  | 2.13595100   | 5.64031400  |
| H | -1 | -5.72401900  | -1.21340200  | 4.08182000  |
| H | -1 | -7.32093800  | -0.95690600  | 5.98266300  |
| H | -1 | -8.02120100  | 3.34000500   | 9.99000400  |
| H | -1 | -9.29916600  | -0.76326500  | 10.05777900 |
| H | -1 | -7.80703900  | -1.17050500  | 8.09765000  |
| H | -1 | 0.62475700   | -4.65723900  | -4.18952300 |
| H | -1 | -0.64049700  | -6.39575000  | -5.47464700 |
| H | -1 | -2.50135500  | -7.80604200  | -5.18006000 |
| H | -1 | -4.02549200  | -9.45165000  | -6.29568600 |
| H | -1 | -5.52350100  | -6.23111600  | -8.70405300 |
| H | -1 | -2.74972700  | -2.05510300  | -4.66103400 |
| H | -1 | -0.42088100  | -6.01732700  | -2.33390300 |
| H | -1 | -4.73395700  | -7.31387500  | -0.41782800 |
| H | -1 | -3.34540000  | -5.61057300  | 0.77601900  |
| H | -1 | -5.99248100  | -7.46130900  | -2.41808600 |
| H | -1 | -7.35252300  | -9.18526600  | -3.63406800 |

|   |    |             |              |             |
|---|----|-------------|--------------|-------------|
| H | -1 | -3.70550300 | -11.30391000 | -4.42763000 |
| H | -1 | -4.87277900 | -1.31852100  | -3.68465500 |
| H | -1 | -6.33783900 | -2.88117500  | -4.97550100 |
| H | -1 | -4.95747600 | -4.13519100  | -0.45365300 |
| H | -1 | -9.50977600 | -7.56570200  | -3.44859400 |
| H | -1 | -7.61946700 | -6.71839900  | -7.21193100 |
| H | -1 | -6.28588000 | -4.95174200  | -6.04717300 |
| H | -1 | 6.43200100  | 1.69338800   | 0.35847100  |
| H | -1 | 12.79213400 | 1.79071400   | 0.78169600  |
| H | -1 | 12.73735900 | -1.88157400  | 3.00941100  |
| H | -1 | 10.27987000 | -1.55071900  | 3.33034400  |
| H | -1 | 8.53822800  | -0.36861400  | 4.26374300  |
| H | -1 | 6.05553300  | -0.07803700  | 4.24560300  |
| H | -1 | 2.29442400  | 8.06656700   | -1.77125400 |
| H | -1 | 2.74494100  | 5.87333300   | -0.64795000 |
| H | -1 | -1.14116900 | 6.15210700   | 1.14074400  |
| H | -1 | 0.90442200  | 8.90710600   | -3.48942500 |
| H | -1 | 0.15564200  | 10.98887600  | -4.67088900 |
| H | -1 | -1.77096900 | 12.19711200  | -1.03085300 |
| N | -1 | -2.10205000 | -7.19983100  | -2.54367400 |
| N | -1 | -3.50005700 | -9.56843500  | -3.33396500 |
| N | -1 | -2.95580600 | -3.92539900  | -5.51291900 |
| N | -1 | -4.03953400 | -5.72320100  | -7.36892800 |
| N | -1 | -6.02529300 | -4.68762600  | -2.13011200 |
| N | -1 | -8.10141300 | -6.06370400  | -3.41512800 |
| N | -1 | 10.95777300 | 1.23691800   | 1.53274800  |
| N | -1 | 8.20347000  | 1.08261400   | 1.22268400  |
| N | -1 | -0.77004000 | 10.39909600  | -0.94806200 |
| N | -1 | -0.62487500 | 7.73003600   | -0.08896700 |
| N | -1 | -5.18625600 | 1.55837600   | 6.74981900  |
| N | -1 | -7.20851600 | 2.13277600   | 8.53254100  |
| N | -1 | -3.59651600 | -1.98871500  | 7.05685500  |
| N | -1 | -4.80706800 | -1.83118500  | 9.60200800  |
| N | -1 | 7.31625400  | -3.24372000  | 2.57951100  |
| N | -1 | 9.95336200  | -4.24195400  | 2.67222800  |
| N | -1 | 7.68658300  | -2.32180100  | -1.89051200 |
| N | -1 | 10.39272500 | -2.56900900  | -2.76169700 |
| N | -1 | 0.39631300  | 8.44722700   | -6.16227000 |
| N | -1 | 0.83345900  | 6.37515400   | -4.23706600 |
| N | -1 | -3.68814100 | 6.04606500   | -3.08228200 |
| N | -1 | -4.96491900 | 8.32355700   | -4.07597900 |
| C | 0  | 1.36020600  | 0.86337000   | 5.01857200  |
| O | 0  | 2.19465300  | 0.75709400   | 5.90390000  |
| C | 0  | 0.19765200  | 1.88537600   | 5.28327100  |
| O | 0  | -0.39644900 | 2.48269900   | 4.39209500  |
| O | 0  | -0.13585200 | 2.00076300   | 6.56844900  |
| H | 0  | -0.90907100 | 2.59765200   | 6.64246600  |

Sum of electronic and thermal Free Energies = -13350.535940 (Hartree/Particle).

**Table S19:** DFT-optimized geometry of  $f\text{-[Ce}^{\text{III}}(\text{OC-COOH})\text{-Ce}^{\text{III}}\text{]}^{2-}$  (doublet), computed at the UB3LYP-D3/ 6-31G\* (HCNO)/ MWB28 (Ce) level in water solvent using PCM.

| Atom |    | x          | y           | z           |
|------|----|------------|-------------|-------------|
| Ce   | -1 | 1.37197400 | -2.19095800 | -0.61326100 |

|    |    |              |              |             |
|----|----|--------------|--------------|-------------|
| Ce | 0  | -0.98130000  | 1.82736500   | 1.84086000  |
| Ce | -1 | -1.74634800  | -1.64848400  | 1.50365500  |
| Ce | -1 | 2.15663100   | 1.54910600   | -0.18093800 |
| Ce | -1 | -1.26469000  | 0.43212400   | -1.44450500 |
| Ce | 0  | 1.68817000   | -0.66023000  | 2.86257900  |
| O  | -1 | -4.66761000  | 13.12227100  | -4.57131800 |
| C  | -1 | -4.16496900  | 10.80716400  | -2.93197200 |
| C  | -1 | -3.89756500  | 9.61606500   | -2.26630800 |
| O  | -1 | -6.14783500  | -10.00127800 | -7.70007400 |
| C  | -1 | -4.08089100  | -8.36922600  | -6.60559900 |
| C  | -1 | -3.21661000  | -7.46190400  | -6.00706500 |
| O  | -1 | 14.12042400  | -4.03625200  | 0.24809200  |
| C  | -1 | 11.28267800  | -4.23081600  | 0.13210000  |
| C  | -1 | 9.89652000   | -4.17774300  | 0.17718300  |
| O  | -1 | 14.80781900  | 0.41981300   | 0.42150100  |
| C  | -1 | 12.26046000  | 1.00812000   | 1.28214800  |
| O  | -1 | -6.75080600  | 1.20052200   | 12.73819500 |
| C  | -1 | -4.70829200  | 0.68526600   | 10.81191000 |
| C  | -1 | -3.83216100  | 0.37010500   | 9.78068700  |
| O  | -1 | -9.29613100  | -8.68774800  | -7.22406500 |
| C  | -1 | -7.82080900  | -6.47043400  | -6.13569500 |
| C  | -1 | -7.08665600  | -5.48459100  | -5.48760100 |
| C  | -1 | -2.29916800  | 9.30047800   | -6.37989000 |
| C  | -1 | -1.99005900  | 8.10083300   | -5.75384300 |
| O  | -1 | -2.35403800  | 13.60572700  | -2.89015500 |
| C  | -1 | -1.16589700  | 11.50694300  | -1.54905300 |
| C  | -1 | 12.17657500  | -0.84209700  | -1.60151100 |
| C  | -1 | 10.81051800  | -0.60003600  | -1.52832700 |
| O  | -1 | -7.72216800  | -11.23479100 | -5.03234000 |
| C  | -1 | -6.33517600  | -9.24589400  | -3.53525800 |
| C  | -1 | -5.57346600  | -8.30662500  | -2.85299500 |
| O  | -1 | -9.92583200  | 0.65860000   | 12.19909000 |
| C  | -1 | -8.67834700  | 0.03315900   | 9.66482300  |
| C  | -1 | -7.85851500  | -0.18376500  | 8.56423200  |
| O  | -1 | 14.37963200  | -3.40527300  | -2.96502400 |
| C  | -1 | 11.67215300  | -2.79566500  | -2.90134900 |
| O  | -1 | -5.77450200  | -12.29802100 | -5.44433100 |
| C  | -1 | -4.30355700  | -10.43538000 | -4.00174800 |
| O  | -1 | -9.70964200  | 2.85019300   | 11.72361500 |
| C  | -1 | -7.95464000  | 2.32271400   | 9.63512000  |
| O  | -1 | -1.35423000  | 13.07122200  | -4.84424600 |
| C  | -1 | -0.09006300  | 10.83939100  | -3.58820700 |
| C  | -1 | 0.34225000   | 9.69500300   | -2.93097800 |
| O  | -1 | 15.00086200  | -1.36143100  | 1.79379000  |
| C  | -1 | 12.23374200  | -1.04083600  | 2.53094300  |
| C  | -1 | 10.87235300  | -0.84074700  | 2.72943400  |
| C  | -1 | 0.05155100   | 9.62762700   | -6.73569500 |
| O  | -1 | -10.21316500 | -9.05880600  | -5.20033900 |
| C  | -1 | -8.85591300  | -6.95937900  | -4.02631000 |
| O  | -1 | -7.54524900  | -0.89321100  | 12.46611100 |
| C  | -1 | -5.58902200  | -1.54064400  | 10.62237900 |
| O  | -1 | 14.03425200  | -4.05006500  | 2.50507700  |
| C  | -1 | 11.27752400  | -4.32107800  | 2.53046000  |
| O  | -1 | -5.58895500  | 11.79453300  | -6.14048100 |
| C  | -1 | -5.23641100  | 9.50710900   | -4.64151100 |
| O  | -1 | -6.91569500  | -8.23902200  | -8.88690600 |
| C  | -1 | -4.93424200  | -6.56149900  | -7.93314100 |
| O  | -1 | 0.13689300   | -4.29467600  | -0.54766200 |
| C  | -1 | -1.41329600  | -6.27197700  | -1.90887000 |
| O  | -1 | -2.82103600  | 1.38296600   | 3.35846200  |

|   |    |             |             |             |
|---|----|-------------|-------------|-------------|
| C | -1 | -4.34001600 | 1.42438400  | 5.73702200  |
| O | -1 | 0.09988100  | 4.08612700  | 1.74144800  |
| C | -1 | 1.80850400  | 6.40415400  | -0.48673500 |
| C | -1 | 1.55087800  | 7.61944200  | -1.10789500 |
| O | -1 | 3.54782400  | -1.68092300 | -1.60453300 |
| C | -1 | 6.34237400  | -2.11067200 | -1.84613100 |
| O | -1 | -3.46799900 | -0.74135100 | 2.97650400  |
| C | -1 | -5.56316800 | -0.44278800 | 4.86268800  |
| C | -1 | -6.43431400 | -0.30681300 | 5.93663100  |
| O | -1 | 2.00765000  | 3.81607800  | 0.57536500  |
| C | -1 | -0.35936600 | 6.57002900  | 0.52817100  |
| O | -1 | 3.88512100  | 0.54242500  | -1.48834000 |
| C | -1 | 6.59213700  | 0.26319800  | -2.07080500 |
| C | -1 | 7.96078100  | 0.05633700  | -2.17759200 |
| O | -1 | -1.55434900 | -3.97241200 | 0.90543300  |
| C | -1 | -3.03786800 | -6.04069500 | -0.16095500 |
| C | -1 | -3.81425200 | -6.97710600 | -0.82813400 |
| O | -1 | -0.91033400 | -1.03856800 | -3.36169800 |
| C | -1 | -2.31470700 | -2.97929900 | -4.83247500 |
| O | -1 | 3.24088900  | -2.49287700 | 2.65430500  |
| C | -1 | 5.99732000  | -3.04387200 | 2.56217500  |
| O | -1 | -2.62653200 | 2.42206000  | -1.41441800 |
| C | -1 | -3.36874100 | 4.90401700  | -2.49443900 |
| O | -1 | -2.52275900 | 3.30134500  | 0.65685500  |
| C | -1 | -3.58685800 | 5.74209700  | -0.26034300 |
| C | -1 | -3.94171000 | 6.96801300  | -0.81167000 |
| O | -1 | 0.71393200  | -2.52386200 | -2.88328400 |
| C | -1 | -0.42703400 | -4.43827400 | -4.57938500 |
| C | -1 | -1.14163400 | -5.39790400 | -5.28508200 |
| O | -1 | 2.95150500  | -3.46961500 | 0.64362400  |
| C | -1 | 5.58642900  | -4.39282600 | 0.61918200  |
| C | -1 | 6.95235000  | -4.63386100 | 0.56355200  |
| O | -1 | -3.60270500 | -2.11632800 | 0.01832900  |
| C | -1 | -5.28317100 | -3.81199300 | -1.43924600 |
| O | -1 | 1.68569400  | 2.79599900  | -2.24035900 |
| C | -1 | 1.10103500  | 5.24523200  | -3.60635500 |
| O | -1 | 4.12060400  | 1.65852000  | 1.19749700  |
| C | -1 | 6.67078600  | 0.21848500  | 3.36172300  |
| C | -1 | 8.05087400  | 0.04896500  | 3.35551800  |
| O | -1 | -1.36536300 | -2.70691100 | 3.66630200  |
| C | -1 | -2.81116000 | -2.29452900 | 6.01299200  |
| O | -1 | -3.34779600 | -0.75159200 | -1.75520300 |
| C | -1 | -5.23555900 | -2.22912900 | -3.23805600 |
| C | -1 | -6.04922200 | -3.09982500 | -3.95379000 |
| O | -1 | 0.53943300  | -1.94115800 | 4.59797100  |
| C | -1 | -0.89495800 | -1.18665100 | 6.92969100  |
| C | -1 | -1.68296300 | -0.83849700 | 8.02050900  |
| O | -1 | 3.86367000  | 0.36595400  | 3.02444400  |
| C | -1 | 6.87847700  | 1.22297000  | 1.19466600  |
| O | -1 | -0.22871900 | 1.91065700  | -3.03397000 |
| C | -1 | -0.77928700 | 4.11816000  | -4.57670200 |
| C | -1 | -1.09628500 | 5.30611300  | -5.21877100 |
| O | -1 | 2.11284000  | -0.51402800 | 0.72638300  |
| O | -1 | -0.00982600 | 1.76798500  | -0.10105900 |
| O | -1 | -0.45239100 | -0.16115000 | 2.60066000  |
| O | -1 | -0.70563400 | -1.51656400 | -0.48111000 |
| O | -1 | 0.58093100  | -2.41509900 | 1.66437600  |
| O | -1 | 1.15034500  | -0.04164700 | -1.66438000 |
| O | -1 | 1.41204900  | 1.59388100  | 2.18774200  |
| O | -1 | -2.09827200 | 0.39208600  | 0.64777400  |

|   |    |             |              |             |
|---|----|-------------|--------------|-------------|
| C | -1 | -5.00950800 | 12.01266900  | -4.94606700 |
| C | -1 | -4.82879400 | 10.76257000  | -4.16154600 |
| C | -1 | -4.30635100 | 8.40617600   | -2.84900600 |
| C | -1 | -6.04297600 | -8.83927000  | -8.05097900 |
| C | -1 | -4.98568700 | -7.91494500  | -7.56835100 |
| C | -1 | -3.27856600 | -6.11544400  | -6.40289200 |
| C | -1 | 13.47786100 | -4.13102900  | 1.27866400  |
| C | -1 | 12.00065500 | -4.27347800  | 1.32900100  |
| C | -1 | 9.26535900  | -4.17914800  | 1.43152400  |
| C | -1 | 14.34770600 | -0.42526900  | 1.36620200  |
| C | -1 | 12.94666600 | -0.12122000  | 1.75791500  |
| C | -1 | 10.25991300 | 0.28386700   | 2.15594600  |
| C | -1 | -6.65543800 | 0.09102100   | 12.24012400 |
| C | -1 | -5.61566400 | -0.28397400  | 11.24729700 |
| C | -1 | -3.90096000 | -0.90539400  | 9.19939000  |
| C | -1 | -9.42037900 | -8.38070400  | -6.04948000 |
| C | -1 | -8.71504000 | -7.24751400  | -5.39413800 |
| C | -1 | -7.26247000 | -5.30290300  | -4.10761100 |
| C | -1 | -1.26395800 | 10.09430100  | -6.87892200 |
| C | -1 | -0.64135700 | 7.72297100   | -5.65289900 |
| C | -1 | -1.51983600 | 12.86993200  | -3.65426700 |
| C | -1 | -0.88745600 | 11.75805800  | -2.90049600 |
| C | -1 | -0.03668100 | 9.50713500   | -1.59190500 |
| C | -1 | 12.62972700 | -1.96934600  | -2.29129700 |
| C | -1 | 9.92968200  | -1.49172600  | -2.16120200 |
| C | -1 | -6.51280800 | -11.30819300 | -4.90582800 |
| C | -1 | -5.69643900 | -10.33568200 | -4.13321600 |
| C | -1 | -4.18244200 | -8.49267900  | -2.78099700 |
| C | -1 | -9.50728900 | 1.54598800   | 11.47005900 |
| C | -1 | -8.72765500 | 1.31295600   | 10.22801300 |
| C | -1 | -7.10683200 | 0.88643400   | 8.05098200  |
| C | -1 | -1.00700200 | -4.57019000  | -0.07276500 |
| C | -1 | -1.81278900 | -5.65642000  | -0.71550700 |
| C | -1 | -3.34353200 | -7.51168700  | -2.03707900 |
| C | -1 | -3.52917600 | 0.35340900   | 3.60372900  |
| C | -1 | -4.49606800 | 0.44867600   | 4.74135500  |
| C | -1 | -6.19491800 | 0.69994200   | 6.88520100  |
| C | -1 | 0.99053800  | 4.49385300   | 0.94160700  |
| C | -1 | 0.82622400  | 5.84830100   | 0.33762100  |
| C | -1 | 0.31554700  | 8.24689800   | -0.88397700 |
| C | -1 | 4.28607800  | -0.65254200  | -1.65162300 |
| C | -1 | 5.75367000  | -0.83901700  | -1.87945900 |
| C | -1 | 8.45950400  | -1.25304100  | -2.09456300 |
| C | -1 | -0.36017200 | -2.17295300  | -3.47367300 |
| C | -1 | -1.02670400 | -3.20110600  | -4.32624700 |
| C | -1 | -2.44247400 | -5.09324900  | -5.71663900 |
| C | -1 | 3.65578200  | -3.15640300  | 1.65313400  |
| C | -1 | 5.09040300  | -3.56116400  | 1.62725200  |
| C | -1 | 7.78710200  | -4.02823000  | 1.51616800  |
| C | -1 | -2.78522300 | 3.36706700   | -0.58412600 |
| C | -1 | -3.27422100 | 4.68029300   | -1.11346100 |
| C | -1 | -3.97416600 | 7.10165300   | -2.20836000 |
| C | -1 | -3.86369600 | -1.75151800  | -1.16880500 |
| C | -1 | -4.82317400 | -2.59131800  | -1.95289500 |
| C | -1 | -6.43235600 | -4.31415700  | -3.36301700 |
| C | -1 | 0.63227200  | 2.84022000   | -2.94572000 |
| C | -1 | 0.33375400  | 4.07945900   | -3.73218500 |
| C | -1 | -0.28711500 | 6.43094400   | -5.00137700 |
| C | -1 | 4.57380300  | 0.95992200   | 2.15690400  |
| C | -1 | 6.05803700  | 0.81056600   | 2.25435400  |

|   |    |              |              |             |
|---|----|--------------|--------------|-------------|
| C | -1 | 8.78417500   | 0.47794400   | 2.23785800  |
| C | -1 | -0.70647100  | -2.22306200  | 4.63232000  |
| C | -1 | -1.46553100  | -1.91576100  | 5.88387500  |
| C | -1 | -3.02088500  | -1.26013300  | 8.05185400  |
| H | -1 | 1.42030300   | -0.00028400  | -2.59600000 |
| H | -1 | 1.86469700   | 2.34801000   | 2.59614600  |
| H | -1 | 0.61993100   | -3.31299400  | 2.03127000  |
| C | -1 | 14.08725600  | -2.26509700  | -2.31002600 |
| O | -1 | 14.93739100  | -1.56109500  | -1.79328900 |
| H | -1 | 15.34498800  | -3.53686800  | -2.90316700 |
| H | -1 | -7.71911000  | -8.79531000  | -8.92766500 |
| H | -1 | -6.38113600  | -12.86866800 | -5.95339800 |
| H | -1 | -10.57334500 | -9.82642100  | -5.68429800 |
| H | -1 | 15.62736900  | 0.03698100   | 0.05340700  |
| H | -1 | -2.93900000  | 14.10600800  | -3.49298900 |
| C | -1 | -1.60527200  | 11.40090200  | -7.49990200 |
| O | -1 | -2.74226900  | 11.82270300  | -7.61566500 |
| O | -1 | -0.52233500  | 12.07003900  | -7.94131400 |
| H | -1 | -0.83477800  | 12.92084300  | -8.30366900 |
| H | -1 | -5.59778000  | 12.64397700  | -6.62171700 |
| H | -1 | -10.18751700 | 2.91628700   | 12.57327200 |
| H | -1 | -8.33773200  | -0.49166600  | 12.88160300 |
| H | -1 | 14.94044800  | -3.70325700  | 2.39200900  |
| H | -1 | 0.14817100   | -0.90308900  | 6.88401000  |
| H | -1 | -1.26215200  | -0.27696800  | 8.84738000  |
| H | -1 | -3.28292000  | -2.85592500  | 5.21245000  |
| H | -1 | -3.14154200  | 1.11348800   | 9.39963000  |
| H | -1 | -4.72077100  | 1.67232700   | 11.26164000 |
| H | -1 | -6.27430000  | -2.32039800  | 10.94180400 |
| H | -1 | 5.63189600   | -2.40414200  | 3.35936200  |
| H | -1 | 7.36844700   | -5.27516300  | -0.20498700 |
| H | -1 | 4.90670100   | -4.82193500  | -0.10895800 |
| H | -1 | 11.80145000  | -4.38084800  | 3.48050200  |
| H | -1 | 11.82019100  | -4.19810900  | -0.80673500 |
| H | -1 | 9.31870900   | -4.06148700  | -0.73301000 |
| H | -1 | 5.71368500   | -2.98456700  | -1.70853700 |
| H | -1 | 11.98707600  | -3.67663000  | -3.45401700 |
| H | -1 | 12.89598600  | -0.18692600  | -1.12547500 |
| H | -1 | 10.42716400  | 0.23965100   | -0.95915300 |
| H | -1 | 8.63350100   | 0.89251600   | -2.32955100 |
| H | -1 | 6.16754500   | 1.25936600   | -2.12538200 |
| H | -1 | 1.97517700   | 5.24047200   | -2.96363400 |
| H | -1 | 0.88241500   | 10.21483100  | -7.11745900 |
| H | -1 | -3.32172100  | 9.64073900   | -6.48218700 |
| H | -1 | -2.77007300  | 7.47865700   | -5.32740800 |
| H | -1 | -1.95403900  | 5.36568300   | -5.87884600 |
| H | -1 | -1.38179900  | 3.22694600   | -4.71019300 |
| H | -1 | -3.54730700  | 5.59989100   | 0.81384500  |
| H | -1 | -4.19759600  | 7.80397900   | -0.17087500 |
| H | -1 | -3.14235000  | 4.09368000   | -3.17950800 |
| H | -1 | -5.77965100  | 9.43374800   | -5.57978400 |
| H | -1 | -3.84289300  | 11.76163300  | -2.53259800 |
| H | -1 | -3.33306900  | 9.62012400   | -1.34081200 |
| H | -1 | -3.51509200  | 2.12936400   | 5.66783700  |
| H | -1 | -5.71427700  | -1.20860200  | 4.10980400  |
| H | -1 | -7.29880100  | -0.95571600  | 6.02147400  |
| H | -1 | -7.96386500  | 3.32713300   | 10.04981000 |
| H | -1 | -9.25135000  | -0.77328600  | 10.10947100 |
| H | -1 | -7.77234900  | -1.17643000  | 8.13857700  |
| H | -1 | 0.57491700   | -4.63526300  | -4.21402300 |

|   |    |             |              |             |
|---|----|-------------|--------------|-------------|
| H | -1 | -0.70246700 | -6.36567800  | -5.49807300 |
| H | -1 | -2.56489100 | -7.77263400  | -5.19749000 |
| H | -1 | -4.09988000 | -9.41018900  | -6.31008300 |
| H | -1 | -5.60490500 | -6.17665000  | -8.69655100 |
| H | -1 | -2.79608300 | -2.02319300  | -4.65449600 |
| H | -1 | -0.46254200 | -6.00009300  | -2.35729500 |
| H | -1 | -4.76684100 | -7.29376200  | -0.41965700 |
| H | -1 | -3.36680500 | -5.59849400  | 0.77221900  |
| H | -1 | -6.03804700 | -7.43033100  | -2.41265300 |
| H | -1 | -7.40975500 | -9.14623500  | -3.62692000 |
| H | -1 | -3.77286200 | -11.27051800 | -4.45128500 |
| H | -1 | -4.91127000 | -1.28533800  | -3.66213800 |
| H | -1 | -6.38806500 | -2.83939500  | -4.94998700 |
| H | -1 | -4.98285500 | -4.11443400  | -0.44169200 |
| H | -1 | -9.56188100 | -7.52222700  | -3.42178800 |
| H | -1 | -7.69279500 | -6.66473400  | -7.19340800 |
| H | -1 | -6.34775400 | -4.90586600  | -6.03003300 |
| H | -1 | 6.42554400  | 1.68351300   | 0.32272100  |
| H | -1 | 12.78838600 | 1.76388400   | 0.70698000  |
| H | -1 | 12.73844900 | -1.91696100  | 2.92064100  |
| H | -1 | 10.28379900 | -1.58145700  | 3.25805500  |
| H | -1 | 8.55083100  | -0.39883300  | 4.20681400  |
| H | -1 | 6.06878500  | -0.10221700  | 4.20516300  |
| H | -1 | 2.29038600  | 8.07491900   | -1.75648300 |
| H | -1 | 2.74250200  | 5.87622300   | -0.64455700 |
| H | -1 | -1.13179900 | 6.15733100   | 1.16921200  |
| H | -1 | 0.89184700  | 8.92552300   | -3.46273100 |
| H | -1 | 0.14084400  | 11.01370100  | -4.63140800 |
| H | -1 | -1.76031200 | 12.21229600  | -0.97483800 |
| N | -1 | -2.14784200 | -7.17771900  | -2.56127800 |
| N | -1 | -3.55645200 | -9.53984000  | -3.35214600 |
| N | -1 | -3.01196100 | -3.88963600  | -5.51238300 |
| N | -1 | -4.11149300 | -5.67754100  | -7.36865700 |
| N | -1 | -6.06234300 | -4.65772600  | -2.11365900 |
| N | -1 | -8.14969500 | -6.02376200  | -3.39117100 |
| N | -1 | 10.95735900 | 1.21156300   | 1.46719500  |
| N | -1 | 8.20082600  | 1.06509900   | 1.17357100  |
| N | -1 | -0.76326100 | 10.41156700  | -0.90525800 |
| N | -1 | -0.61927700 | 7.73882100   | -0.05750000 |
| N | -1 | -5.15331900 | 1.55140000   | 6.78522400  |
| N | -1 | -7.16313000 | 2.12367300   | 8.58264800  |
| N | -1 | -3.57033300 | -2.00067900  | 7.06857600  |
| N | -1 | -4.76476000 | -1.85021100  | 9.62176300  |
| N | -1 | 7.31150000  | -3.26437200  | 2.51896300  |
| N | -1 | 9.94669700  | -4.26930000  | 2.59147200  |
| N | -1 | 7.65645700  | -2.32584000  | -1.94963300 |
| N | -1 | 10.35655900 | -2.57613900  | -2.83849500 |
| N | -1 | 0.36612700  | 8.47734300   | -6.13415700 |
| N | -1 | 0.81011800  | 6.39669800   | -4.21979600 |
| N | -1 | -3.70505000 | 6.07396100   | -3.03836300 |
| N | -1 | -4.98240400 | 8.35839200   | -4.01524800 |
| C | 0  | 1.82962400  | 0.46354100   | 5.18618900  |
| O | 0  | 2.55528700  | -0.00546400  | 6.04926400  |
| C | 0  | 0.86826300  | 1.62044300   | 5.64186600  |
| O | 0  | 0.15401900  | 2.22470300   | 4.86675300  |
| O | 0  | 0.98006400  | 1.94738800   | 6.93137200  |
| H | 0  | 0.35572100  | 2.69012400   | 7.05392100  |

---

Sum of electronic and thermal Free Energies = -13350.741828 (Hartree/Particle).



**Table S20:** DFT-optimized geometry of  $f\text{-[Ce}^{\text{III}}(\text{OHC-COOH})\text{-Ce}^{\text{III}}]^{2-}$  (singlet), computed at the B3LYP-D3/ 6-31G\* (HCNO)/ MWB28 (Ce) level in water solvent using PCM.

| Atom |    | x            | y            | z           |
|------|----|--------------|--------------|-------------|
| Ce   | -1 | 1.37773700   | -2.19896000  | -0.61379500 |
| Ce   | 0  | -0.97804800  | 1.83082000   | 1.77407300  |
| Ce   | -1 | -1.74458300  | -1.64288300  | 1.49367800  |
| Ce   | -1 | 2.16335000   | 1.54314300   | -0.20130900 |
| Ce   | -1 | -1.25596200  | 0.42057800   | -1.46536800 |
| Ce   | 0  | 1.69745900   | -0.60421300  | 2.91955500  |
| O    | -1 | -4.64635800  | 13.09423600  | -4.67165500 |
| C    | -1 | -4.14815800  | 10.78831400  | -3.01806800 |
| C    | -1 | -3.88267900  | 9.60091900   | -2.34505600 |
| O    | -1 | -6.13158400  | -10.04614200 | -7.67094700 |
| C    | -1 | -4.06605300  | -8.40883700  | -6.58166200 |
| C    | -1 | -3.20253800  | -7.49851500  | -5.98658800 |
| O    | -1 | 14.12351800  | -4.04538200  | 0.28385800  |
| C    | -1 | 11.28591800  | -4.23925100  | 0.16325000  |
| C    | -1 | 9.89969700   | -4.18525900  | 0.20522900  |
| O    | -1 | 14.81274300  | 0.41127400   | 0.43313900  |
| C    | -1 | 12.26394100  | 1.00571600   | 1.28525600  |
| O    | -1 | -6.77029800  | 1.27280300   | 12.70159000 |
| C    | -1 | -4.72415500  | 0.74554900   | 10.78241600 |
| C    | -1 | -3.84610000  | 0.42406800   | 9.75478600  |
| O    | -1 | -9.28019100  | -8.72840300  | -7.20882700 |
| C    | -1 | -7.80598200  | -6.50559800  | -6.13019200 |
| C    | -1 | -7.07265500  | -5.51641100  | -5.48627200 |
| C    | -1 | -2.27614300  | 9.26101700   | -6.45352700 |
| C    | -1 | -1.96888500  | 8.06483000   | -5.81999900 |
| O    | -1 | -2.33594500  | 13.58620600  | -2.98861700 |
| C    | -1 | -1.15153900  | 11.49456800  | -1.63312400 |
| C    | -1 | 12.18496700  | -0.86094300  | -1.58792600 |
| C    | -1 | 10.81888400  | -0.61781400  | -1.51888800 |
| O    | -1 | -7.71189800  | -11.26360500 | -4.99938000 |
| C    | -1 | -6.32695600  | -9.26683000  | -3.51091100 |
| C    | -1 | -5.56616400  | -8.32403400  | -2.83250000 |
| O    | -1 | -9.94449400  | 0.72932000   | 12.15918500 |
| C    | -1 | -8.69220700  | 0.08878000   | 9.63106500  |
| C    | -1 | -7.87026200  | -0.13483500  | 8.53339300  |
| O    | -1 | 14.38951600  | -3.43293700  | -2.93228800 |
| C    | -1 | 11.68221200  | -2.82168100  | -2.87757400 |
| O    | -1 | -5.76392500  | -12.33010700 | -5.40134200 |
| C    | -1 | -4.29498200  | -10.45993900 | -3.96647900 |
| O    | -1 | -9.72627400  | 2.91805000   | 11.67160800 |
| C    | -1 | -7.96732000  | 2.37778200   | 9.58971500  |
| O    | -1 | -1.33246000  | 13.04004100  | -4.93759300 |
| C    | -1 | -0.07192100  | 10.81483600  | -3.66624500 |
| C    | -1 | 0.35850600   | 9.67402400   | -3.00160300 |
| O    | -1 | 15.00214500  | -1.36217400  | 1.81599100  |
| C    | -1 | 12.23370100  | -1.03604100  | 2.54570500  |
| C    | -1 | 10.87201200  | -0.83416800  | 2.74029800  |
| C    | -1 | 0.07544900   | 9.58500000   | -6.80645100 |
| O    | -1 | -10.20148600 | -9.08742800  | -5.18486600 |
| C    | -1 | -8.84557800  | -6.98196100  | -4.02013700 |
| O    | -1 | -7.56521500  | -0.82207400  | 12.43989500 |
| C    | -1 | -5.60559000  | -1.48099000  | 10.60385500 |
| O    | -1 | 14.03278700  | -4.04622900  | 2.54070600  |

|   |    |             |             |             |
|---|----|-------------|-------------|-------------|
| C | -1 | 11.27588100 | -4.31577500 | 2.56207200  |
| O | -1 | -5.56518500 | 11.75797400 | -6.23504800 |
| C | -1 | -5.21678500 | 9.47900300  | -4.72229700 |
| O | -1 | -6.89618600 | -8.29034400 | -8.86939800 |
| C | -1 | -4.91584000 | -6.60833400 | -7.92125300 |
| O | -1 | 0.14149600  | -4.30167800 | -0.53864700 |
| C | -1 | -1.40691200 | -6.28600000 | -1.89163900 |
| O | -1 | -2.82152800 | 1.39965300  | 3.32892300  |
| C | -1 | -4.34528200 | 1.45541600  | 5.70413400  |
| O | -1 | 0.10396800  | 4.09211300  | 1.70236200  |
| C | -1 | 1.81821500  | 6.39652600  | -0.53560100 |
| C | -1 | 1.56243800  | 7.60835900  | -1.16422800 |
| O | -1 | 3.55583000  | -1.69565000 | -1.60357300 |
| C | -1 | 6.35065200  | -2.12811000 | -1.83706200 |
| O | -1 | -3.46875800 | -0.72650700 | 2.95782800  |
| C | -1 | -5.56758100 | -0.41614800 | 4.83803600  |
| C | -1 | -6.44082500 | -0.27360800 | 5.90942200  |
| O | -1 | 2.01395300  | 3.81448000  | 0.54169900  |
| C | -1 | -0.35161500 | 6.56924600  | 0.47395800  |
| O | -1 | 3.89398100  | 0.52816500  | -1.49943100 |
| C | -1 | 6.60202800  | 0.24431500  | -2.07481900 |
| C | -1 | 7.97078400  | 0.03619100  | -2.17765600 |
| O | -1 | -1.55251600 | -3.97028900 | 0.90916000  |
| C | -1 | -3.03489300 | -6.04393700 | -0.14836200 |
| C | -1 | -3.81038700 | -6.98378100 | -0.81173500 |
| O | -1 | -0.89845900 | -1.06123800 | -3.37338900 |
| C | -1 | -2.30081200 | -3.00968800 | -4.83586400 |
| O | -1 | 3.23990900  | -2.48305500 | 2.65921500  |
| C | -1 | 5.99625000  | -3.03588600 | 2.57580900  |
| O | -1 | -2.61688800 | 2.41130400  | -1.44942500 |
| C | -1 | -3.35570200 | 4.88739000  | -2.54513600 |
| O | -1 | -2.51686300 | 3.30238600  | 0.61698500  |
| C | -1 | -3.57791600 | 5.73835400  | -0.31632000 |
| C | -1 | -3.93105500 | 6.96126200  | -0.87537300 |
| O | -1 | 0.72411100  | -2.54454400 | -2.88319900 |
| C | -1 | -0.41436800 | -4.46809200 | -4.57061200 |
| C | -1 | -1.12801300 | -5.43140600 | -5.27224500 |
| O | -1 | 2.95410300  | -3.47115300 | 0.65357900  |
| C | -1 | 5.58861900  | -4.39574800 | 0.63974600  |
| C | -1 | 6.95453100  | -4.63775000 | 0.58825600  |
| O | -1 | -3.59817000 | -2.11833800 | 0.00730900  |
| C | -1 | -5.27652200 | -3.82151800 | -1.44392600 |
| O | -1 | 1.69717800  | 2.77844700  | -2.26878200 |
| C | -1 | 1.11647400  | 5.22009700  | -3.64995700 |
| O | -1 | 4.12459100  | 1.65951000  | 1.18044100  |
| C | -1 | 6.66969800  | 0.23067400  | 3.35802300  |
| C | -1 | 8.04971300  | 0.06046200  | 3.35557700  |
| O | -1 | -1.36847900 | -2.68908900 | 3.66311500  |
| C | -1 | -2.81880500 | -2.26258500 | 6.00448000  |
| O | -1 | -3.33901600 | -0.76390200 | -1.77349000 |
| C | -1 | -5.22450700 | -2.24900500 | -3.25166900 |
| C | -1 | -6.03715100 | -3.12339700 | -3.96404800 |
| O | -1 | 0.53480800  | -1.91892400 | 4.59422900  |
| C | -1 | -0.90391500 | -1.15039200 | 6.91868900  |
| C | -1 | -1.69394800 | -0.79562000 | 8.00590200  |
| O | -1 | 3.86334100  | 0.37755000  | 3.01423600  |
| C | -1 | 6.88225100  | 1.22263300  | 1.18567500  |
| O | -1 | -0.21606400 | 1.88948900  | -3.06117600 |
| C | -1 | -0.76243900 | 4.08838500  | -4.61763100 |
| C | -1 | -1.07756000 | 5.27279300  | -5.26713000 |

|   |    |             |              |             |
|---|----|-------------|--------------|-------------|
| O | -1 | 2.11671900  | -0.51474000  | 0.71772000  |
| O | -1 | -0.00315700 | 1.76351100   | -0.12706000 |
| O | -1 | -0.45211400 | -0.14990900  | 2.58476000  |
| O | -1 | -0.69980400 | -1.52282800  | -0.48970400 |
| O | -1 | 0.58199100  | -2.40967700  | 1.66348600  |
| O | -1 | 1.15928000  | -0.05559800  | -1.67764700 |
| O | -1 | 1.41401300  | 1.60183700   | 2.16556700  |
| O | -1 | -2.09378300 | 0.39292100   | 0.62541800  |
| C | -1 | -4.98804200 | 11.98266900  | -5.04073500 |
| C | -1 | -4.80952300 | 10.73699700  | -4.24870500 |
| C | -1 | -4.29088200 | 8.38790800   | -2.92164300 |
| C | -1 | -6.02544800 | -8.88621300  | -8.02828700 |
| C | -1 | -4.96868300 | -7.95964400  | -7.54882500 |
| C | -1 | -3.26303600 | -6.15431400  | -6.39024200 |
| C | -1 | 13.47883200 | -4.13394900  | 1.31365600  |
| C | -1 | 12.00145700 | -4.27540200  | 1.36182400  |
| C | -1 | 9.26600700  | -4.17917900  | 1.45828000  |
| C | -1 | 14.35031200 | -0.42816400  | 1.38173100  |
| C | -1 | 12.94863300 | -0.12120800  | 1.76886600  |
| C | -1 | 10.26128100 | 0.28743500   | 2.15914400  |
| C | -1 | -6.67446900 | 0.16042200   | 12.21007400 |
| C | -1 | -5.63287700 | -0.22074900  | 11.22151300 |
| C | -1 | -3.91435100 | -0.85470500  | 9.18066500  |
| C | -1 | -9.40665800 | -8.41457900  | -6.03627200 |
| C | -1 | -8.70208700 | -7.27799100  | -5.38600600 |
| C | -1 | -7.25116400 | -5.32673900  | -4.10770300 |
| C | -1 | -1.23954000 | 10.05147500  | -6.95500500 |
| C | -1 | -0.62057400 | 7.68690700   | -5.71416900 |
| C | -1 | -1.50056400 | 12.84564800  | -3.74681800 |
| C | -1 | -0.87024900 | 11.73780700  | -2.98541700 |
| C | -1 | -0.02321700 | 9.49400800   | -1.66224400 |
| C | -1 | 12.63895800 | -1.99234000  | -2.27032900 |
| C | -1 | 9.93889000  | -1.51269200  | -2.14842500 |
| C | -1 | -6.50283200 | -11.33685900 | -4.87000700 |
| C | -1 | -5.68754800 | -10.36033000 | -4.10132900 |
| C | -1 | -4.17537900 | -8.51033800  | -2.75662800 |
| C | -1 | -9.52404800 | 1.61231800   | 11.42593200 |
| C | -1 | -8.74202400 | 1.37180500   | 10.18681800 |
| C | -1 | -7.11702200 | 0.93204800   | 8.01554300  |
| C | -1 | -1.00348900 | -4.57392100  | -0.06449100 |
| C | -1 | -1.80850900 | -5.66342900  | -0.70262900 |
| C | -1 | -3.33749100 | -7.52550200  | -2.01664700 |
| C | -1 | -3.53066400 | 0.37185500   | 3.57865000  |
| C | -1 | -4.49980200 | 0.47409700   | 4.71375700  |
| C | -1 | -6.20285000 | 0.73844800   | 6.85269400  |
| C | -1 | 0.99643600  | 4.49482600   | 0.90200000  |
| C | -1 | 0.83400300  | 5.84587200   | 0.28993900  |
| C | -1 | 0.32696500  | 8.23767800   | -0.94640200 |
| C | -1 | 4.29468100  | -0.66790800  | -1.65506000 |
| C | -1 | 5.76263800  | -0.85638600  | -1.87886000 |
| C | -1 | 8.46869800  | -1.27292700  | -2.08612300 |
| C | -1 | -0.34862800 | -2.19650800  | -3.47775500 |
| C | -1 | -1.01394100 | -3.22920800  | -4.32577300 |
| C | -1 | -2.42783000 | -5.12860500  | -5.70816600 |
| C | -1 | 3.65649600  | -3.15250200  | 1.66270000  |
| C | -1 | 5.09096700  | -3.55808900  | 1.64203300  |
| C | -1 | 7.78765600  | -4.02707200  | 1.53907200  |
| C | -1 | -2.77679100 | 3.36112600   | -0.62488000 |
| C | -1 | -3.26407800 | 4.67153200   | -1.16271200 |
| C | -1 | -3.96062800 | 7.08691700   | -2.27286800 |

|   |    |              |              |             |
|---|----|--------------|--------------|-------------|
| C | -1 | -3.85658700  | -1.76020800  | -1.18242000 |
| C | -1 | -4.81489300  | -2.60402500  | -1.96362500 |
| C | -1 | -6.42207000  | -4.33414200  | -3.36710700 |
| C | -1 | 0.64520200   | 2.81913200   | -2.97651100 |
| C | -1 | 0.34887800   | 4.05398800   | -3.77066000 |
| C | -1 | -0.26827900  | 6.39846400   | -5.05454600 |
| C | -1 | 4.57551200   | 0.96620100   | 2.14474600  |
| C | -1 | 6.05947300   | 0.81669700   | 2.24604800  |
| C | -1 | 8.78547700   | 0.48268400   | 2.23696300  |
| C | -1 | -0.71130100  | -2.20003200  | 4.62767500  |
| C | -1 | -1.47273300  | -1.88520600  | 5.87591500  |
| C | -1 | -3.03213600  | -1.21643000  | 8.03695900  |
| H | -1 | 1.43113600   | -0.01970000  | -2.60894200 |
| H | -1 | 1.86620500   | 2.35807700   | 2.57056100  |
| H | -1 | 0.61981100   | -3.30547400  | 2.03559300  |
| C | -1 | 14.09637700  | -2.28888900  | -2.28442100 |
| O | -1 | 14.94581200  | -1.58234600  | -1.77000700 |
| H | -1 | 15.35468000  | -3.56463800  | -2.86772800 |
| H | -1 | -7.69978900  | -8.84647200  | -8.90859400 |
| H | -1 | -6.36981100  | -12.90337100 | -5.90835700 |
| H | -1 | -10.56106500 | -9.85763000  | -5.66514900 |
| H | -1 | 15.63284600  | 0.02594900   | 0.06889900  |
| H | -1 | -2.91944500  | 14.08330600  | -3.59548700 |
| C | -1 | -1.57896200  | 11.35466100  | -7.58414300 |
| O | -1 | -2.71551600  | 11.77633600  | -7.70461500 |
| O | -1 | -0.49481000  | 12.02074200  | -8.02719100 |
| H | -1 | -0.80610400  | 12.86960600  | -8.39504200 |
| H | -1 | -5.57262400  | 12.60465200  | -6.72115600 |
| H | -1 | -10.20582900 | 2.98923700   | 12.51990500 |
| H | -1 | -8.35833700  | -0.41777800  | 12.85147900 |
| H | -1 | 14.93937900  | -3.70050700  | 2.42748500  |
| H | -1 | 0.13944300   | -0.86759500  | 6.87349300  |
| H | -1 | -1.27453000  | -0.22956600  | 8.83039300  |
| H | -1 | -3.28922400  | -2.82833100  | 5.20621400  |
| H | -1 | -3.15435000  | 1.16492700   | 9.37087500  |
| H | -1 | -4.73705800  | 1.73517400   | 11.22646100 |
| H | -1 | -6.29189200  | -2.25857400  | 10.92635400 |
| H | -1 | 5.62953200   | -2.39142700  | 3.36858000  |
| H | -1 | 7.37186300   | -5.28364100  | -0.17575800 |
| H | -1 | 4.91015100   | -4.82869400  | -0.08729800 |
| H | -1 | 11.79786000  | -4.37035400  | 3.51349700  |
| H | -1 | 11.82533900  | -4.21217800  | -0.77466900 |
| H | -1 | 9.32378100   | -4.07394100  | -0.70678000 |
| H | -1 | 5.72125900   | -3.00090300  | -1.69573700 |
| H | -1 | 11.99781800  | -3.70594700  | -3.42455100 |
| H | -1 | 12.90373700  | -0.20340100  | -1.11419600 |
| H | -1 | 10.43479400  | 0.22530200   | -0.95530700 |
| H | -1 | 8.64421800   | 0.87116600   | -2.33304000 |
| H | -1 | 6.17803500   | 1.24035700   | -2.13595700 |
| H | -1 | 1.98931500   | 5.21859900   | -3.00545500 |
| H | -1 | 0.90736800   | 10.16961100  | -7.18989200 |
| H | -1 | -3.29832100  | 9.60117600   | -6.55983600 |
| H | -1 | -2.75006200  | 7.44547900   | -5.39158500 |
| H | -1 | -1.93395100  | 5.32899100   | -5.92926600 |
| H | -1 | -1.36511600  | 3.19670900   | -4.74723300 |
| H | -1 | -3.54060100  | 5.60228300   | 0.75874200  |
| H | -1 | -4.18782400  | 7.80100600   | -0.23989300 |
| H | -1 | -3.12832700  | 4.07303500   | -3.22509600 |
| H | -1 | -5.75816800  | 9.40053000   | -5.66123000 |
| H | -1 | -3.82642000  | 11.74490100  | -2.62351600 |

|   |    |             |              |             |
|---|----|-------------|--------------|-------------|
| H | -1 | -3.32005000 | 9.61000900   | -1.41846000 |
| H | -1 | -3.51987500 | 2.15959500   | 5.63258100  |
| H | -1 | -5.71754500 | -1.18618700  | 4.08924600  |
| H | -1 | -7.30579800 | -0.92160100  | 5.99623200  |
| H | -1 | -7.97689100 | 3.38456200   | 9.99862900  |
| H | -1 | -9.26649900 | -0.71483100  | 10.07916500 |
| H | -1 | -7.78372400 | -1.12996200  | 8.11360400  |
| H | -1 | 0.58674700  | -4.66346400  | -4.20210500 |
| H | -1 | -0.68889000 | -6.40059300  | -5.47880300 |
| H | -1 | -2.55260500 | -7.80491500  | -5.17393200 |
| H | -1 | -4.08614800 | -9.44808100  | -6.28023000 |
| H | -1 | -5.58477300 | -6.22754200  | -8.68820700 |
| H | -1 | -2.78207900 | -2.05234800  | -4.66433400 |
| H | -1 | -0.45512200 | -6.01714300  | -2.33969200 |
| H | -1 | -4.76395300 | -7.29763800  | -0.40337800 |
| H | -1 | -3.36549500 | -5.59624200  | 0.78159900  |
| H | -1 | -6.03120300 | -7.44501000  | -2.39812200 |
| H | -1 | -7.40129900 | -9.16718500  | -3.60531200 |
| H | -1 | -3.76379100 | -11.29789000 | -4.41015400 |
| H | -1 | -4.89890200 | -1.30781300  | -3.68049200 |
| H | -1 | -6.37385600 | -2.86851400  | -4.96240200 |
| H | -1 | -4.97836600 | -4.11838600  | -0.44405100 |
| H | -1 | -9.55303900 | -7.54100100  | -3.41383000 |
| H | -1 | -7.67592900 | -6.70601300  | -7.18651500 |
| H | -1 | -6.33237800 | -4.94115400  | -6.03051400 |
| H | -1 | 6.43130300  | 1.67839200   | 0.31019400  |
| H | -1 | 12.79339500 | 1.75792200   | 0.70683800  |
| H | -1 | 12.73719200 | -1.91016200  | 2.94143200  |
| H | -1 | 10.28203200 | -1.57155700  | 3.27196100  |
| H | -1 | 8.54773200  | -0.38269200  | 4.21043100  |
| H | -1 | 6.06584000  | -0.08490400  | 4.20206800  |
| H | -1 | 2.30347500  | 8.05976200   | -1.81391800 |
| H | -1 | 2.75227200  | 5.86725400   | -0.68851000 |
| H | -1 | -1.12554200 | 6.16059400   | 1.11579000  |
| H | -1 | 0.90879800  | 8.90124900   | -3.52783000 |
| H | -1 | 0.16117500  | 10.98305900  | -4.70995900 |
| H | -1 | -1.74676500 | 12.20348200  | -1.06415800 |
| N | -1 | -2.14058300 | -7.19511200  | -2.54033300 |
| N | -1 | -3.54875100 | -9.56105100  | -3.32050800 |
| N | -1 | -2.99713900 | -3.92357000  | -5.51195500 |
| N | -1 | -4.09379900 | -5.72155000  | -7.36017900 |
| N | -1 | -6.05474500 | -4.67072800  | -2.11505800 |
| N | -1 | -8.14018500 | -6.04306000  | -3.38894100 |
| N | -1 | 10.96056900 | 1.21083900   | 1.46650200  |
| N | -1 | 8.20456200  | 1.06401300   | 1.16815500  |
| N | -1 | -0.75073900 | 10.40270500  | -0.98225500 |
| N | -1 | -0.60977300 | 7.73478900   | -0.11891900 |
| N | -1 | -5.16063500 | 1.58882100   | 6.74994700  |
| N | -1 | -7.17378700 | 2.17233900   | 8.54000200  |
| N | -1 | -3.57996200 | -1.96233200  | 7.05682900  |
| N | -1 | -4.77946300 | -1.79667500  | 9.60669400  |
| N | -1 | 7.31040600  | -3.25725800  | 2.53651400  |
| N | -1 | 9.94496000  | -4.26301200  | 2.62009900  |
| N | -1 | 7.66483500  | -2.34449500  | -1.93667600 |
| N | -1 | 10.36660100 | -2.60117000  | -2.81863500 |
| N | -1 | 0.38824800  | 8.43802900   | -6.19770300 |
| N | -1 | 0.82735800  | 6.36817000   | -4.27056700 |
| N | -1 | -3.69034100 | 6.05436000   | -3.09642900 |
| N | -1 | -4.96460400 | 8.33377000   | -4.08895500 |
| O | 0  | 1.67994500  | 0.59709300   | 4.79377100  |

|   |   |             |            |            |
|---|---|-------------|------------|------------|
| C | 0 | 0.68399000  | 1.42071200 | 5.25884100 |
| C | 0 | 0.67141200  | 1.69076400 | 6.76035100 |
| O | 0 | -0.18010600 | 2.36748800 | 7.30989300 |
| O | 0 | 1.67375800  | 1.09364000 | 7.43691900 |
| H | 0 | 1.55200000  | 1.32175600 | 8.37952600 |
| H | 0 | -0.04429300 | 1.85007500 | 4.60298100 |

Sum of electronic and thermal Free Energies = -13351.322795 (Hartree/Particle).

**Table S21:** DFT-optimized geometry of  $\mathbf{f-[Ce^{III}(OH_2C-COOH)-Ce^{III}]^{2-}}$  (doublet), computed at the UB3LYP-D3/ 6-31G\* (HCNO)/ MWB28 (Ce) level in water solvent using PCM.

| Atom |    | x           | y            | z           |
|------|----|-------------|--------------|-------------|
| Ce   | -1 | 1.37712300  | -2.20046200  | -0.61528800 |
| Ce   | 0  | -0.97785400 | 1.83128500   | 1.77005500  |
| Ce   | -1 | -1.74492900 | -1.64249300  | 1.49208200  |
| Ce   | -1 | 2.16332700  | 1.54180400   | -0.20540800 |
| Ce   | -1 | -1.25626200 | 0.41888900   | -1.46840500 |
| Ce   | 0  | 1.69739300  | -0.60336700  | 2.91695200  |
| O    | -1 | -4.64506300 | 13.09087300  | -4.68298400 |
| C    | -1 | -4.14705900 | 10.78599900  | -3.02787800 |
| C    | -1 | -3.88169700 | 9.59902100   | -2.35408500 |
| O    | -1 | -6.13398100 | -10.05131200 | -7.66646000 |
| C    | -1 | -4.06811200 | -8.41357500  | -6.57846600 |
| C    | -1 | -3.20440900 | -7.50297800  | -5.98408500 |
| O    | -1 | 14.12271000 | -4.04816400  | 0.28249600  |
| C    | -1 | 11.28507000 | -4.24169400  | 0.16226900  |
| C    | -1 | 9.89886100  | -4.18746800  | 0.20433300  |
| O    | -1 | 14.81260800 | 0.40849000   | 0.42869500  |
| C    | -1 | 12.26396900 | 1.00388800   | 1.28063300  |
| O    | -1 | -6.76922500 | 1.28153300   | 12.69845700 |
| C    | -1 | -4.72332900 | 0.75267500   | 10.77946100 |
| C    | -1 | -3.84541200 | 0.43036800   | 9.75197200  |
| O    | -1 | -9.28235200 | -8.73279400  | -7.20495600 |
| C    | -1 | -7.80771900 | -6.50947700  | -6.12795800 |
| C    | -1 | -7.07418900 | -5.51996200  | -5.48477300 |
| C    | -1 | -2.27557300 | 9.25609600   | -6.46246600 |
| C    | -1 | -1.96843600 | 8.06029300   | -5.82815400 |
| O    | -1 | -2.33442900 | 13.58364100  | -3.00048300 |
| C    | -1 | -1.15021400 | 11.49274700  | -1.64367600 |
| C    | -1 | 12.18446600 | -0.86470700  | -1.59127600 |
| C    | -1 | 10.81842500 | -0.62132900  | -1.52228300 |
| O    | -1 | -7.71424000 | -11.26673000 | -4.99392900 |
| C    | -1 | -6.32887100 | -9.26915200  | -3.50693600 |
| C    | -1 | -5.56788000 | -8.32600900  | -2.82923100 |
| O    | -1 | -9.94355000 | 0.73815300   | 12.15669900 |
| C    | -1 | -8.69158000 | 0.09571400   | 9.62890400  |
| C    | -1 | -7.86976500 | -0.12876600  | 8.53131100  |
| O    | -1 | 14.38851500 | -3.43793800  | -2.93408800 |
| C    | -1 | 11.68130700 | -2.82624400  | -2.87955000 |
| O    | -1 | -5.76646100 | -12.33379300 | -5.39533900 |
| C    | -1 | -4.29711400 | -10.46287000 | -3.96187300 |
| O    | -1 | -9.72504800 | 2.92652000   | 11.66761900 |
| C    | -1 | -7.96635800 | 2.38458000   | 9.58593900  |
| O    | -1 | -1.33119600 | 13.03600700  | -4.94917600 |

|   |    |              |             |             |
|---|----|--------------|-------------|-------------|
| C | -1 | -0.07087500  | 10.81147700 | -3.67643100 |
| C | -1 | 0.35944100   | 9.67105200  | -3.01105400 |
| O | -1 | 15.00186900  | -1.36404800 | 1.81273200  |
| C | -1 | 12.23353800  | -1.03701000 | 2.54246900  |
| C | -1 | 10.87189600  | -0.83480400 | 2.73704400  |
| C | -1 | 0.07603600   | 9.57949100  | -6.81581600 |
| O | -1 | -10.20352200 | -9.09031000 | -5.18067100 |
| C | -1 | -8.84720000  | -6.98425500 | -4.01748900 |
| O | -1 | -7.56447600  | -0.81340300 | 12.43825100 |
| C | -1 | -5.60511000  | -1.47385300 | 10.60248600 |
| O | -1 | 14.03217700  | -4.04746700 | 2.53935200  |
| C | -1 | 11.27523300  | -4.31659000 | 2.56114300  |
| O | -1 | -5.56422600  | 11.75368800 | -6.24539000 |
| C | -1 | -5.21603000  | 9.47569100  | -4.73112500 |
| O | -1 | -6.89842800  | -8.29621400 | -8.86603300 |
| C | -1 | -4.91775000  | -6.61385500 | -7.91920300 |
| O | -1 | 0.14057800   | -4.30294500 | -0.53860600 |
| C | -1 | -1.40824300  | -6.28795400 | -1.89011700 |
| O | -1 | -2.82126100  | 1.40144500  | 3.32535900  |
| C | -1 | -4.34479800  | 1.45904400  | 5.70066500  |
| O | -1 | 0.10449000   | 4.09236900  | 1.69671600  |
| C | -1 | 1.81888200   | 6.39501000  | -0.54295900 |
| C | -1 | 1.56322900   | 7.60645500  | -1.17238500 |
| O | -1 | 3.55520400   | -1.69814500 | -1.60559900 |
| C | -1 | 6.34994100   | -2.13117800 | -1.83904000 |
| O | -1 | -3.46883900  | -0.72487000 | 2.95576200  |
| C | -1 | -5.56745100  | -0.41292500 | 4.83594400  |
| C | -1 | -6.44057900  | -0.26953000 | 5.90730900  |
| O | -1 | 2.01433200   | 3.81366600  | 0.53607400  |
| C | -1 | -0.35083400  | 6.56873600  | 0.46667300  |
| O | -1 | 3.89369300   | 0.52569000  | -1.50299400 |
| C | -1 | 6.60164800   | 0.24104800  | -2.07842700 |
| C | -1 | 7.97036400   | 0.03265200  | -2.18124300 |
| O | -1 | -1.55325800  | -3.97032400 | 0.90912500  |
| C | -1 | -3.03603500  | -6.04446800 | -0.14686100 |
| C | -1 | -3.81172700  | -6.98464700 | -0.80952900 |
| O | -1 | -0.89914700  | -1.06427300 | -3.37545300 |
| C | -1 | -2.30191700  | -3.01350600 | -4.83648300 |
| O | -1 | 3.23954100   | -2.48261400 | 2.65775000  |
| C | -1 | 5.99579300   | -3.03591000 | 2.57447600  |
| O | -1 | -2.61689200  | 2.40982700  | -1.45369200 |
| C | -1 | -3.35543600  | 4.88527900  | -2.55101600 |
| O | -1 | -2.51655300  | 3.30229500  | 0.61210500  |
| C | -1 | -3.57732700  | 5.73778700  | -0.32275800 |
| C | -1 | -3.93033400  | 6.96036800  | -0.88260900 |
| O | -1 | 0.72324700   | -2.54748700 | -2.88440000 |
| C | -1 | -0.41566600  | -4.47200900 | -4.57040900 |
| C | -1 | -1.12951500  | -5.43569300 | -5.27132600 |
| O | -1 | 2.95341200   | -3.47202900 | 0.65280900  |
| C | -1 | 5.58779000   | -4.39702300 | 0.63937100  |
| C | -1 | 6.95366200   | -4.63926300 | 0.58792500  |
| O | -1 | -3.59871700  | -2.11868100 | 0.00619800  |
| C | -1 | -5.27744900  | -3.82259600 | -1.44373400 |
| O | -1 | 1.69715600   | 2.77577500  | -2.27367700 |
| C | -1 | 1.11669200   | 5.21657400  | -3.65645500 |
| O | -1 | 4.12470700   | 1.65881700  | 1.17609100  |
| C | -1 | 6.66979400   | 0.23108000  | 3.35441700  |
| C | -1 | 8.04978300   | 0.06066200  | 3.35196500  |
| O | -1 | -1.36878900  | -2.68728500 | 3.66219400  |
| C | -1 | -2.81884600  | -2.25897900 | 6.00339700  |

|   |    |             |              |             |
|---|----|-------------|--------------|-------------|
| O | -1 | -3.33951900 | -0.76549100  | -1.77554100 |
| C | -1 | -5.22536000 | -2.25131600  | -3.25254700 |
| C | -1 | -6.03819600 | -3.12607000  | -3.96426200 |
| O | -1 | 0.53469400  | -1.91677100  | 4.59261900  |
| C | -1 | -0.90371000 | -1.14645000  | 6.91668400  |
| C | -1 | -1.69359500 | -0.79082400  | 8.00372600  |
| O | -1 | 3.86342800  | 0.37813900   | 3.01077700  |
| C | -1 | 6.88230300  | 1.22153500   | 1.18137800  |
| O | -1 | -0.21628700 | 1.88656400   | -3.06530000 |
| C | -1 | -0.76247300 | 4.08448500   | -4.62319700 |
| C | -1 | -1.07747600 | 5.26849900   | -5.27347100 |
| O | -1 | 2.11647200  | -0.51544900  | 0.71502000  |
| O | -1 | -0.00314100 | 1.76254300   | -0.13111800 |
| O | -1 | -0.45214300 | -0.14897200  | 2.58203800  |
| O | -1 | -0.70030600 | -1.52393800  | -0.49147300 |
| O | -1 | 0.58154700  | -2.40951700  | 1.66220500  |
| O | -1 | 1.15889000  | -0.05778900  | -1.68057400 |
| O | -1 | 1.41420700  | 1.60221300   | 2.16149400  |
| O | -1 | -2.09390300 | 0.39277300   | 0.62247300  |
| C | -1 | -4.98694400 | 11.97910700  | -5.05128000 |
| C | -1 | -4.80854000 | 10.73394600  | -4.25842200 |
| C | -1 | -4.29013000 | 8.38568000   | -2.92981300 |
| C | -1 | -6.02770500 | -8.89164100  | -8.02459500 |
| C | -1 | -4.97076000 | -7.96490400  | -7.54585400 |
| C | -1 | -3.26474400 | -6.15904200  | -6.38864500 |
| C | -1 | 13.47810100 | -4.13593700  | 1.31241000  |
| C | -1 | 12.00071000 | -4.27713800  | 1.36080400  |
| C | -1 | 9.26528200  | -4.18044500  | 1.45743500  |
| C | -1 | 14.35013600 | -0.43023600  | 1.37789700  |
| C | -1 | 12.94853700 | -0.12281000  | 1.76494700  |
| C | -1 | 10.26128000 | 0.28649600   | 2.15518400  |
| C | -1 | -6.67360400 | 0.16880500   | 12.20768600 |
| C | -1 | -5.63215600 | -0.21319000  | 11.21929200 |
| C | -1 | -3.91390300 | -0.84878400  | 9.17872300  |
| C | -1 | -9.40866900 | -8.41815600  | -6.03260300 |
| C | -1 | -8.70387300 | -7.28123200  | -5.38316900 |
| C | -1 | -7.25254800 | -5.32932900  | -4.10631700 |
| C | -1 | -1.23889700 | 10.04606000  | -6.96457000 |
| C | -1 | -0.62017200 | 7.68224200   | -5.72218600 |
| C | -1 | -1.49922400 | 12.84244600  | -3.75825500 |
| C | -1 | -0.86900700 | 11.73502800  | -2.99615900 |
| C | -1 | -0.02219100 | 9.49200100   | -1.67154000 |
| C | -1 | 12.63822900 | -1.99663300  | -2.27295200 |
| C | -1 | 9.93824300  | -1.51650300  | -2.15113600 |
| C | -1 | -6.50517400 | -11.34007500 | -4.86461300 |
| C | -1 | -5.68967700 | -10.36314600 | -4.09666800 |
| C | -1 | -4.17711600 | -8.51246700  | -2.75335500 |
| C | -1 | -9.52303700 | 1.62059200   | 11.42281100 |
| C | -1 | -8.74115800 | 1.37912300   | 10.18379100 |
| C | -1 | -7.11641200 | 0.93765400   | 8.01267200  |
| C | -1 | -1.00440600 | -4.57469700  | -0.06416500 |
| C | -1 | -1.80964400 | -5.66451800  | -0.70149400 |
| C | -1 | -3.33901700 | -7.52725400  | -2.01411500 |
| C | -1 | -3.53052800 | 0.37392200   | 3.57584500  |
| C | -1 | -4.49955100 | 0.47707700   | 4.71096700  |
| C | -1 | -6.20237100 | 0.74313000   | 6.84987400  |
| C | -1 | 0.99694700  | 4.49440700   | 0.89600300  |
| C | -1 | 0.83466100  | 5.84506200   | 0.28304000  |
| C | -1 | 0.32786800  | 8.23610400   | -0.95487700 |
| C | -1 | 4.29420300  | -0.67054800  | -1.65784700 |



|   |    |              |              |             |
|---|----|--------------|--------------|-------------|
| C | -1 | 5.76211200   | -0.85939500  | -1.88164800 |
| C | -1 | 8.46809200   | -1.27647800  | -2.08886700 |
| C | -1 | -0.34949300  | -2.19969500  | -3.47909800 |
| C | -1 | -1.01503400  | -3.23287100  | -4.32635700 |
| C | -1 | -2.42932600  | -5.13299500  | -5.70733800 |
| C | -1 | 3.65594100   | -3.15279800  | 1.66165200  |
| C | -1 | 5.09035100   | -3.55861200  | 1.64113400  |
| C | -1 | 7.78696100   | -4.02806400  | 1.53825400  |
| C | -1 | -2.77658200  | 3.36023100   | -0.62977700 |
| C | -1 | -3.26372200  | 4.67034500   | -1.16845400 |
| C | -1 | -3.96001200  | 7.08508000   | -2.28018600 |
| C | -1 | -3.85718600  | -1.76131900  | -1.18375000 |
| C | -1 | -4.81568500  | -2.60552400  | -1.96429900 |
| C | -1 | -6.42324200  | -4.33635300  | -3.36646700 |
| C | -1 | 0.64512400   | 2.81613600   | -2.98134100 |
| C | -1 | 0.34891300   | 4.05049800   | -3.77630000 |
| C | -1 | -0.26801000  | 6.39419400   | -5.06172100 |
| C | -1 | 4.57561000   | 0.96609500   | 2.14082600  |
| C | -1 | 6.05955800   | 0.81643900   | 2.24209800  |
| C | -1 | 8.78551100   | 0.48201600   | 2.23300000  |
| C | -1 | -0.71145300  | -2.19767100  | 4.62636500  |
| C | -1 | -1.47272900  | -1.88188600  | 5.87445800  |
| C | -1 | -3.03184300  | -1.21141500  | 8.03518500  |
| H | -1 | 1.43067000   | -0.02256200  | -2.61191700 |
| H | -1 | 1.86654700   | 2.35866000   | 2.56593500  |
| H | -1 | 0.61926700   | -3.30506700  | 2.03491600  |
| C | -1 | 14.09560300  | -2.29340800  | -2.28697100 |
| O | -1 | 14.94518800  | -1.58664200  | -1.77311100 |
| H | -1 | 15.35366600  | -3.56973800  | -2.86952400 |
| H | -1 | -7.70211700  | -8.85224900  | -8.90478200 |
| H | -1 | -6.37247600  | -12.90731000 | -5.90191200 |
| H | -1 | -10.56325700 | -9.86078400  | -5.66040000 |
| H | -1 | 15.63262200  | 0.02279700   | 0.06464400  |
| H | -1 | -2.91790900  | 14.08041600  | -3.60763800 |
| C | -1 | -1.57818100  | 11.34887000  | -7.59456200 |
| O | -1 | -2.71468300  | 11.77063100  | -7.71522000 |
| O | -1 | -0.49396900  | 12.01449000  | -8.03815600 |
| H | -1 | -0.80517000  | 12.86315000  | -8.40655500 |
| H | -1 | -5.57158200  | 12.60003700  | -6.73207100 |
| H | -1 | -10.20451800 | 2.99835300   | 12.51591000 |
| H | -1 | -8.35750200  | -0.40871000  | 12.84963100 |
| H | -1 | 14.93881000  | -3.70195700  | 2.42581700  |
| H | -1 | 0.13968600   | -0.86383800  | 6.87120400  |
| H | -1 | -1.27402100  | -0.22427400  | 8.82779600  |
| H | -1 | -3.28941900  | -2.82519600  | 5.20555600  |
| H | -1 | -3.15358700  | 1.17086400   | 9.36749800  |
| H | -1 | -4.73604700  | 1.74260300   | 11.22283600 |
| H | -1 | -6.29149900  | -2.25111700  | 10.92557300 |
| H | -1 | 5.62924000   | -2.39085900  | 3.36684300  |
| H | -1 | 7.37083100   | -5.28573300  | -0.17568700 |
| H | -1 | 4.90919400   | -4.83036200  | -0.08731900 |
| H | -1 | 11.79728800  | -4.37060200  | 3.51255900  |
| H | -1 | 11.82441300  | -4.21533600  | -0.77571600 |
| H | -1 | 9.32288100   | -4.07668300  | -0.70770100 |
| H | -1 | 5.72043100   | -3.00378100  | -1.69706800 |
| H | -1 | 11.99673400  | -3.71092700  | -3.42595600 |
| H | -1 | 12.90337500  | -0.20695000  | -1.11805500 |
| H | -1 | 10.43450900  | 0.22222600   | -0.95923900 |
| H | -1 | 8.64390800   | 0.86742100   | -2.33725300 |
| H | -1 | 6.17779700   | 1.23711100   | -2.14020300 |

|   |    |             |              |             |
|---|----|-------------|--------------|-------------|
| H | -1 | 1.98959000  | 5.21538400   | -3.01202900 |
| H | -1 | 0.90800800  | 10.16371900  | -7.19972600 |
| H | -1 | -3.29771000 | 9.59633400   | -6.56891500 |
| H | -1 | -2.74966700 | 7.44134800   | -5.39925200 |
| H | -1 | -1.93391700 | 5.32437600   | -5.93557000 |
| H | -1 | -1.36529400 | 3.19281100   | -4.75214200 |
| H | -1 | -3.53993800 | 5.60243900   | 0.75239300  |
| H | -1 | -4.18692300 | 7.80058000   | -0.24767500 |
| H | -1 | -3.12824100 | 4.07043000   | -3.23044400 |
| H | -1 | -5.75750700 | 9.39666200   | -5.66995700 |
| H | -1 | -3.82514500 | 11.74280500  | -2.63400300 |
| H | -1 | -3.31898500 | 9.60865500   | -1.42754500 |
| H | -1 | -3.51929300 | 2.16305200   | 5.62856200  |
| H | -1 | -5.71759500 | -1.18345000  | 4.08768900  |
| H | -1 | -7.30564100 | -0.91733600  | 5.99463500  |
| H | -1 | -7.97574300 | 3.39163900   | 9.99417100  |
| H | -1 | -9.26595200 | -0.70750800  | 10.07759900 |
| H | -1 | -7.78341100 | -1.12419100  | 8.11218900  |
| H | -1 | 0.58545300  | -4.66728000  | -4.20185700 |
| H | -1 | -0.69055400 | -6.40508500  | -5.47726600 |
| H | -1 | -2.55445000 | -7.80892400  | -5.17127900 |
| H | -1 | -4.08833400 | -9.45261200  | -6.27632800 |
| H | -1 | -5.58669400 | -6.23348400  | -8.68635600 |
| H | -1 | -2.78302700 | -2.05597900  | -4.66556000 |
| H | -1 | -0.45645300 | -6.01954200  | -2.33843600 |
| H | -1 | -4.76530300 | -7.29808600  | -0.40087500 |
| H | -1 | -3.36648900 | -5.59609400  | 0.78282500  |
| H | -1 | -6.03275100 | -7.44662200  | -2.39540800 |
| H | -1 | -7.40320800 | -9.16941100  | -3.60131000 |
| H | -1 | -3.76608600 | -11.30120100 | -4.40502700 |
| H | -1 | -4.89965300 | -1.31046300  | -3.68203700 |
| H | -1 | -6.37495100 | -2.87181400  | -4.96275900 |
| H | -1 | -4.97924900 | -4.11883000  | -0.44368500 |
| H | -1 | -9.55469000 | -7.54277900  | -3.41074100 |
| H | -1 | -7.67778900 | -6.71062700  | -7.18415600 |
| H | -1 | -6.33387400 | -4.94518400  | -6.02947000 |
| H | -1 | 6.43134500  | 1.67676700   | 0.30562800  |
| H | -1 | 12.79348400 | 1.75562300   | 0.70165900  |
| H | -1 | 12.73693400 | -1.91093700  | 2.93874400  |
| H | -1 | 10.28185300 | -1.57174500  | 3.26925900  |
| H | -1 | 8.54781200  | -0.38198700  | 4.20707500  |
| H | -1 | 6.06596300  | -0.08383700  | 4.19872900  |
| H | -1 | 2.30427600  | 8.05730700   | -1.82244600 |
| H | -1 | 2.75284700  | 5.86549600   | -0.69559200 |
| H | -1 | -1.12476500 | 6.16063400   | 1.10885000  |
| H | -1 | 0.90957200  | 8.89783900   | -3.53680500 |
| H | -1 | 0.16215400  | 10.97895800  | -4.72027900 |
| H | -1 | -1.74528500 | 12.20213500  | -1.07513900 |
| N | -1 | -2.14210600 | -7.19739700  | -2.53813000 |
| N | -1 | -3.55069300 | -9.56365500  | -3.31657700 |
| N | -1 | -2.99843900 | -3.92774300  | -5.51189400 |
| N | -1 | -4.09552800 | -5.72681300  | -7.35880200 |
| N | -1 | -6.05585700 | -4.67214500  | -2.11422200 |
| N | -1 | -8.14161200 | -6.04503100  | -3.38699100 |
| N | -1 | 10.96064300 | 1.20932600   | 1.46185500  |
| N | -1 | 8.20458900  | 1.06270700   | 1.16385000  |
| N | -1 | -0.74951800 | 10.40126600  | -0.99210300 |
| N | -1 | -0.60887100 | 7.73391500   | -0.12697100 |
| N | -1 | -5.16003900 | 1.59327900   | 6.74645900  |
| N | -1 | -7.17294700 | 2.17830800   | 8.53629500  |

|   |    |             |             |             |
|---|----|-------------|-------------|-------------|
| N | -1 | -3.57986500 | -1.95790000 | 7.05560900  |
| N | -1 | -4.77911700 | -1.79033700 | 9.60546700  |
| N | -1 | 7.30991300  | -3.25750300 | 2.53521600  |
| N | -1 | 9.94432500  | -4.26359100 | 2.61925100  |
| N | -1 | 7.66408300  | -2.34782500 | -1.93862300 |
| N | -1 | 10.36573400 | -2.60549800 | -2.82064500 |
| N | -1 | 0.38871900  | 8.43288700  | -6.20631800 |
| N | -1 | 0.82769200  | 6.36426900  | -4.27781800 |
| N | -1 | -3.68995000 | 6.05192500  | -3.10307000 |
| N | -1 | -4.96396300 | 8.33085000  | -4.09702900 |
| O | 0  | 1.68022200  | 0.59921100  | 4.79035500  |
| C | 0  | 0.68442900  | 1.42329300  | 5.25495400  |
| H | 0  | 0.71283300  | 2.42944500  | 4.78877300  |
| H | 0  | -0.32924900 | 1.03493200  | 5.04324200  |
| C | 0  | 0.67202400  | 1.69436400  | 6.75628200  |
| O | 0  | -0.17934600 | 2.37158700  | 7.30544000  |
| O | 0  | 1.67434100  | 1.09755100  | 7.43316600  |
| H | 0  | 1.55269900  | 1.32632400  | 8.37562900  |

Sum of electronic and thermal Free Energies = -13351.893112 (Hartree/Particle).

**Table S22:** DFT-optimized geometry of **f-[Ce<sup>III</sup>(HOH<sub>2</sub>C-COOH)-Ce<sup>III</sup>]<sup>2-</sup>** (singlet), computed at the B3LYP-D3/ 6-31G\* (HCNO)/ MWB28 (Ce) level in water solvent using PCM.

| Atom |    | x           | y            | z           |
|------|----|-------------|--------------|-------------|
| Ce   | -1 | 1.37511800  | -2.20108000  | -0.61851000 |
| Ce   | 0  | -0.97791000 | 1.83153400   | 1.76729100  |
| Ce   | -1 | -1.74561000 | -1.64220700  | 1.49058100  |
| Ce   | -1 | 2.16206100  | 1.54117700   | -0.20996600 |
| Ce   | -1 | -1.25842500 | 0.41842200   | -1.47067500 |
| Ce   | 0  | 1.69769400  | -0.60320600  | 2.91316800  |
| O    | -1 | -4.64745200 | 13.09010800  | -4.68619100 |
| C    | -1 | -4.14877300 | 10.78555300  | -3.03084400 |
| C    | -1 | -3.88316800 | 9.59869600   | -2.35693300 |
| O    | -1 | -6.14120500 | -10.05257200 | -7.66340200 |
| C    | -1 | -4.07447500 | -8.41485700  | -6.57701400 |
| C    | -1 | -3.21029900 | -7.50423600  | -5.98335700 |
| O    | -1 | 14.12099000 | -4.05026400  | 0.27214700  |
| C    | -1 | 11.28325400 | -4.24344500  | 0.15364800  |
| C    | -1 | 9.89707700  | -4.18902600  | 0.19652100  |
| O    | -1 | 14.81156500 | 0.40633300   | 0.41690100  |
| C    | -1 | 12.26351100 | 1.00226700   | 1.27021100  |
| O    | -1 | -6.76287400 | 1.28509100   | 12.69925200 |
| C    | -1 | -4.71818600 | 0.75551500   | 10.77916700 |
| C    | -1 | -3.84092100 | 0.43285300   | 9.75123200  |
| O    | -1 | -9.28912700 | -8.73353000  | -7.20033800 |
| C    | -1 | -7.81356200 | -6.51015800  | -6.12473200 |
| C    | -1 | -7.07951900 | -5.52059100  | -5.48221200 |
| C    | -1 | -2.27952600 | 9.25460300   | -6.46618500 |
| C    | -1 | -1.97217100 | 8.05890700   | -5.83177800 |
| O    | -1 | -2.33575600 | 13.58296000  | -3.00517500 |
| C    | -1 | -1.15101400 | 11.49222500  | -1.64858400 |
| C    | -1 | 12.18205700 | -0.86698500  | -1.60121500 |

|   |    |              |              |             |
|---|----|--------------|--------------|-------------|
| C | -1 | 10.81609000  | -0.62341000  | -1.53146900 |
| O | -1 | -7.72004100  | -11.26716000 | -4.98965200 |
| C | -1 | -6.33352600  | -9.26942000  | -3.50394500 |
| C | -1 | -5.57200800  | -8.32622000  | -2.82691100 |
| O | -1 | -9.93759100  | 0.74200600   | 12.15950200 |
| C | -1 | -8.68720500  | 0.09881300   | 9.63111500  |
| C | -1 | -7.86607100  | -0.12603100  | 8.53308700  |
| O | -1 | 14.38496900  | -3.44082100  | -2.94473500 |
| C | -1 | 11.67787500  | -2.82875500  | -2.88873500 |
| O | -1 | -5.77264100  | -12.33457400 | -5.39196900 |
| C | -1 | -4.30219700  | -10.46351300 | -3.95980900 |
| O | -1 | -9.71909000  | 2.93023000   | 11.66978400 |
| C | -1 | -7.96170600  | 2.38757300   | 9.58718800  |
| O | -1 | -1.33375100  | 13.03474000  | -4.95433500 |
| C | -1 | -0.07297000  | 10.81033900  | -3.68182000 |
| C | -1 | 0.35758900   | 9.67001200   | -3.01643300 |
| O | -1 | 15.00141200  | -1.36590900  | 1.80123800  |
| C | -1 | 12.23355700  | -1.03833400  | 2.53254000  |
| C | -1 | 10.87205800  | -0.83590200  | 2.72787500  |
| C | -1 | 0.07191600   | 9.57760400   | -6.82100500 |
| O | -1 | -10.20914400 | -9.09045300  | -5.17542400 |
| C | -1 | -8.85185400  | -6.98430700  | -4.01353600 |
| O | -1 | -7.55855700  | -0.80980000  | 12.44000500 |
| C | -1 | -5.60036700  | -1.47093700  | 10.60323200 |
| O | -1 | 14.03179500  | -4.04903000  | 2.52905700  |
| C | -1 | 11.27482900  | -4.31778200  | 2.55254500  |
| O | -1 | -5.56771900  | 11.75268200  | -6.24774100 |
| C | -1 | -5.21892700  | 9.47499000   | -4.73315300 |
| O | -1 | -6.90613100  | -8.29765200  | -8.86293000 |
| C | -1 | -4.92466900  | -6.61533600  | -7.91766500 |
| O | -1 | 0.13834000   | -4.30338100  | -0.54060600 |
| C | -1 | -1.41154500  | -6.28849900  | -1.89073700 |
| O | -1 | -2.82045200  | 1.40230000   | 3.32378800  |
| C | -1 | -4.34257300  | 1.46065300   | 5.69998300  |
| O | -1 | 0.10469000   | 4.09245700   | 1.69278500  |
| C | -1 | 1.81805900   | 6.39435000   | -0.54844200 |
| C | -1 | 1.56219300   | 7.60568300   | -1.17799800 |
| O | -1 | 3.55267800   | -1.69928200  | -1.61022900 |
| C | -1 | 6.34721900   | -2.13274000  | -1.84522600 |
| O | -1 | -3.46853000  | -0.72401500  | 2.95506900  |
| C | -1 | -5.56598600  | -0.41135500  | 4.83642200  |
| C | -1 | -6.43846000  | -0.26759500  | 5.90827100  |
| O | -1 | 2.01380600   | 3.81323100   | 0.53107500  |
| C | -1 | -0.35103500  | 6.56859900   | 0.46243600  |
| O | -1 | 3.89152200   | 0.52453200   | -1.50834200 |
| C | -1 | 6.59909800   | 0.23939700   | -2.08531400 |
| C | -1 | 7.96772500   | 0.03079600   | -2.18889300 |
| O | -1 | -1.55459300  | -3.97019900  | 0.90805200  |
| C | -1 | -3.03827100  | -6.04439100  | -0.14657300 |
| C | -1 | -3.81448000  | -6.98462200  | -0.80856200 |
| O | -1 | -0.90263700  | -1.06523100  | -3.37758900 |
| C | -1 | -2.30653200  | -3.01461700  | -4.83733400 |
| O | -1 | 3.23943900   | -2.48271800  | 2.65348900  |
| C | -1 | 5.99556800   | -3.03639900  | 2.56871000  |
| O | -1 | -2.61878200  | 2.40954400   | -1.45561800 |
| C | -1 | -3.35764900  | 4.88483900   | -2.55308000 |
| O | -1 | -2.51710000  | 3.30247900   | 0.60991100  |
| C | -1 | -3.57810600  | 5.73789400   | -0.32488900 |
| C | -1 | -3.93128300  | 6.96039200   | -0.88481500 |
| O | -1 | 0.71985100   | -2.54854600  | -2.88715300 |

|   |    |             |              |             |
|---|----|-------------|--------------|-------------|
| C | -1 | -0.42031700 | -4.47330800  | -4.57203900 |
| C | -1 | -1.13470900 | -5.43706100  | -5.27230900 |
| O | -1 | 2.95199000  | -3.47256100  | 0.64894800  |
| C | -1 | 5.58623700  | -4.39790800  | 0.63416300  |
| C | -1 | 6.95204600  | -4.64034100  | 0.58196400  |
| O | -1 | -3.60034200 | -2.11849400  | 0.00590700  |
| C | -1 | -5.28015900 | -3.82252400  | -1.44263400 |
| O | -1 | 1.69482700  | 2.77472900   | -2.27824600 |
| C | -1 | 1.11386700  | 5.21528300   | -3.66124700 |
| O | -1 | 4.12427500  | 1.65825100   | 1.17034200  |
| C | -1 | 6.67046400  | 0.23068300   | 3.34749100  |
| C | -1 | 8.05042800  | 0.06008100   | 3.34426100  |
| O | -1 | -1.36832200 | -2.68654400  | 3.66071200  |
| C | -1 | -2.81693400 | -2.25750200  | 6.00267500  |
| O | -1 | -3.34202100 | -0.76575300  | -1.77630000 |
| C | -1 | -5.22893400 | -2.25167100  | -3.25184200 |
| C | -1 | -6.04230800 | -3.12648300  | -3.96287200 |
| O | -1 | 0.53581400  | -1.91606600  | 4.58982900  |
| C | -1 | -0.90110900 | -1.14501400  | 6.91456800  |
| C | -1 | -1.69030300 | -0.78903100  | 8.00199500  |
| O | -1 | 3.86391400  | 0.37803400   | 3.00548100  |
| C | -1 | 6.88181600  | 1.22060400   | 1.17409600  |
| O | -1 | -0.21920300 | 1.88558800   | -3.06852700 |
| C | -1 | -0.76602100 | 4.08321900   | -4.62661100 |
| C | -1 | -1.08125300 | 5.26712400   | -5.27697400 |
| O | -1 | 2.11547900  | -0.51585600  | 0.71096800  |
| O | -1 | -0.00433400 | 1.76222100   | -0.13444300 |
| O | -1 | -0.45198000 | -0.14860400  | 2.57942300  |
| O | -1 | -0.70214800 | -1.52425200  | -0.49362100 |
| O | -1 | 0.58086500  | -2.40950000  | 1.65950300  |
| O | -1 | 1.15653700  | -0.05862600  | -1.68416500 |
| O | -1 | 1.41435200  | 1.60223600   | 2.15736500  |
| O | -1 | -2.09483000 | 0.39290300   | 0.62070500  |
| C | -1 | -4.98969900 | 11.97830200  | -5.05402600 |
| C | -1 | -4.81099000 | 10.73330100  | -4.26098400 |
| C | -1 | -4.29210300 | 8.38527500   | -2.93213600 |
| C | -1 | -6.03498800 | -8.89299900  | -8.02187000 |
| C | -1 | -4.97763700 | -7.96629100  | -7.54397100 |
| C | -1 | -3.27069600 | -6.16038600  | -6.38819300 |
| C | -1 | 13.47698000 | -4.13771200  | 1.30246400  |
| C | -1 | 11.99959900 | -4.27870600  | 1.35176700  |
| C | -1 | 9.26424200  | -4.18162700  | 1.44999700  |
| C | -1 | 14.34954500 | -0.43211100  | 1.36657200  |
| C | -1 | 12.94821600 | -0.12440900  | 1.75438100  |
| C | -1 | 10.26124500 | 0.28534400   | 2.14611600  |
| C | -1 | -6.66769100 | 0.17223600   | 12.20868300 |
| C | -1 | -5.62688000 | -0.21012700  | 11.21976100 |
| C | -1 | -3.90992100 | -0.84642300  | 9.17832100  |
| C | -1 | -9.41470800 | -8.41860200  | -6.02798400 |
| C | -1 | -8.70937600 | -7.28162100  | -5.37923200 |
| C | -1 | -7.25703600 | -5.32961400  | -4.10369500 |
| C | -1 | -1.24304300 | 10.04431300  | -6.96908800 |
| C | -1 | -0.62389500 | 7.68070200   | -5.72652100 |
| C | -1 | -1.50109900 | 12.84147900  | -3.76326900 |
| C | -1 | -0.87057700 | 11.73415400  | -3.00129000 |
| C | -1 | -0.02327300 | 9.49132300   | -1.67665100 |
| C | -1 | 12.63526600 | -1.99913000  | -2.28289700 |
| C | -1 | 9.93541600  | -1.51861300  | -2.15959200 |
| C | -1 | -6.51090800 | -11.34063500 | -4.86103600 |
| C | -1 | -5.69482600 | -10.36363600 | -4.09380200 |

|   |    |              |              |             |
|---|----|--------------|--------------|-------------|
| C | -1 | -4.18122400  | -8.51284500  | -2.75181600 |
| C | -1 | -9.51739700  | 1.62421800   | 11.42516000 |
| C | -1 | -8.73628400  | 1.38235800   | 10.18573300 |
| C | -1 | -7.11288400  | 0.94016800   | 8.01375400  |
| C | -1 | -1.00639800  | -4.57487100  | -0.06542300 |
| C | -1 | -1.81215900  | -5.66473300  | -0.70202100 |
| C | -1 | -3.34255600  | -7.52757100  | -2.01330200 |
| C | -1 | -3.52970600  | 0.37492900   | 3.57493300  |
| C | -1 | -4.49804200  | 0.47847700   | 4.71060500  |
| C | -1 | -6.19955900  | 0.74525300   | 6.85045900  |
| C | -1 | 0.99672500   | 4.49419100   | 0.89144900  |
| C | -1 | 0.83425500   | 5.84472500   | 0.27826900  |
| C | -1 | 0.32704500   | 8.23554600   | -0.95990400 |
| C | -1 | 4.29178200   | -0.67179500  | -1.66315400 |
| C | -1 | 5.75953300   | -0.86088900  | -1.88778100 |
| C | -1 | 8.46533400   | -1.27837900  | -2.09650700 |
| C | -1 | -0.35319500  | -2.20075000  | -3.48129600 |
| C | -1 | -1.01937600  | -3.23403400  | -4.32792000 |
| C | -1 | -2.43473800  | -5.13429200  | -5.70762000 |
| C | -1 | 3.65515900   | -3.15318900  | 1.65730000  |
| C | -1 | 5.08950300   | -3.55919800  | 1.63602600  |
| C | -1 | 7.78598900   | -4.02903100  | 1.53165700  |
| C | -1 | -2.77785800  | 3.36016100   | -0.63183000 |
| C | -1 | -3.26514400  | 4.67021400   | -1.17052200 |
| C | -1 | -3.96177300  | 7.08478300   | -2.28240300 |
| C | -1 | -3.85946900  | -1.76137500  | -1.18397100 |
| C | -1 | -4.81854200  | -2.60563400  | -1.96375500 |
| C | -1 | -6.42716000  | -4.33657600  | -3.36456700 |
| C | -1 | 0.64238100   | 2.81506500   | -2.98529500 |
| C | -1 | 0.34586200   | 4.04928100   | -3.78036500 |
| C | -1 | -0.27151200  | 6.39276000   | -5.06596500 |
| C | -1 | 4.57565800   | 0.96569300   | 2.13497100  |
| C | -1 | 6.05964600   | 0.81586400   | 2.23539800  |
| C | -1 | 8.78554900   | 0.48107800   | 2.22476200  |
| C | -1 | -0.71035000  | -2.19679300  | 4.62438000  |
| C | -1 | -1.47084400  | -1.88061700  | 5.87285000  |
| C | -1 | -3.02858800  | -1.20943700  | 8.03434500  |
| H | -1 | 1.42777000   | -0.02365100  | -2.61567700 |
| H | -1 | 1.86703200   | 2.35871700   | 2.56136200  |
| H | -1 | 0.61868700   | -3.30496800  | 2.03240000  |
| C | -1 | 14.09259200  | -2.29610100  | -2.29771100 |
| O | -1 | 14.94257500  | -1.58932900  | -1.78451900 |
| H | -1 | 15.35014100  | -3.57273400  | -2.88071300 |
| H | -1 | -7.70991600  | -8.85358900  | -8.90107300 |
| H | -1 | -6.37903300  | -12.90812900 | -5.89804900 |
| H | -1 | -10.56926600 | -9.86099100  | -5.65476100 |
| H | -1 | 15.63131200  | 0.02044600   | 0.05245400  |
| H | -1 | -2.91953000  | 14.07967200  | -3.61209900 |
| C | -1 | -1.58252800  | 11.34702100  | -7.59918100 |
| O | -1 | -2.71904500  | 11.76890500  | -7.71926400 |
| O | -1 | -0.49849100  | 12.01239400  | -8.04357300 |
| H | -1 | -0.80979800  | 12.86101000  | -8.41198500 |
| H | -1 | -5.57525100  | 12.59891800  | -6.73461400 |
| H | -1 | -10.19804700 | 3.00232400   | 12.51834200 |
| H | -1 | -8.35128500  | -0.40490700  | 12.85176100 |
| H | -1 | 14.93840600  | -3.70366700  | 2.41490400  |
| H | -1 | 0.14229700   | -0.86255100  | 6.86840300  |
| H | -1 | -1.27016500  | -0.22234500  | 8.82568400  |
| H | -1 | -3.28805500  | -2.82384200  | 5.20524500  |
| H | -1 | -3.14922600  | 1.17316800   | 9.36617600  |

|   |    |             |              |             |
|---|----|-------------|--------------|-------------|
| H | -1 | -4.73051000 | 1.74554800   | 11.22231900 |
| H | -1 | -6.28666700 | -2.24803500  | 10.92690700 |
| H | -1 | 5.62957000  | -2.39111500  | 3.36114400  |
| H | -1 | 7.36867700  | -5.28704400  | -0.18174500 |
| H | -1 | 4.90715300  | -4.83132600  | -0.09202300 |
| H | -1 | 11.79744100 | -4.37164200  | 3.50366300  |
| H | -1 | 11.82204400 | -4.21737700  | -0.78466300 |
| H | -1 | 9.32057100  | -4.07837600  | -0.71519700 |
| H | -1 | 5.71767700  | -3.00522600  | -1.70267800 |
| H | -1 | 11.99286100 | -3.71360700  | -3.43512200 |
| H | -1 | 12.90133400 | -0.20921400  | -1.12857400 |
| H | -1 | 10.43261900 | 0.22032700   | -0.96839400 |
| H | -1 | 8.64128700  | 0.86543900   | -2.34549600 |
| H | -1 | 6.17534300  | 1.23550200   | -2.14707000 |
| H | -1 | 1.98714700  | 5.21412700   | -3.01733800 |
| H | -1 | 0.90373800  | 10.16163200  | -7.20554400 |
| H | -1 | -3.30168100 | 9.59495200   | -6.57210800 |
| H | -1 | -2.75323000 | 7.44016500   | -5.40226900 |
| H | -1 | -1.93807900 | 5.32296000   | -5.93857800 |
| H | -1 | -1.36903600 | 3.19159500   | -4.75499100 |
| H | -1 | -3.54009700 | 5.60279100   | 0.75027100  |
| H | -1 | -4.18738400 | 7.80078500   | -0.24992400 |
| H | -1 | -3.13096500 | 4.06980200   | -3.23245300 |
| H | -1 | -5.76097100 | 9.39581500   | -5.67164500 |
| H | -1 | -3.82649800 | 11.74240700  | -2.63738300 |
| H | -1 | -3.31990600 | 9.60847100   | -1.43072900 |
| H | -1 | -3.51701700 | 2.16453500   | 5.62722700  |
| H | -1 | -5.71667600 | -1.18203400  | 4.08843600  |
| H | -1 | -7.30355600 | -0.91526600  | 5.99626100  |
| H | -1 | -7.97071500 | 3.39472800   | 9.99519100  |
| H | -1 | -9.26141800 | -0.70422800  | 10.08033700 |
| H | -1 | -7.78009700 | -1.12156500  | 8.11414600  |
| H | -1 | 0.58099500  | -4.66862700  | -4.20403500 |
| H | -1 | -0.69599800 | -6.40655900  | -5.47828300 |
| H | -1 | -2.55989900 | -7.81007900  | -5.17086500 |
| H | -1 | -4.09465500 | -9.45382100  | -6.27462200 |
| H | -1 | -5.59401700 | -6.23505400  | -8.68451000 |
| H | -1 | -2.78741300 | -2.05698700  | -4.66634800 |
| H | -1 | -0.45998500 | -6.02031700  | -2.33968200 |
| H | -1 | -4.76785500 | -7.29783900  | -0.39927000 |
| H | -1 | -3.36811400 | -5.59575800  | 0.78320500  |
| H | -1 | -6.03650500 | -7.44667100  | -2.39301700 |
| H | -1 | -7.40790500 | -9.16955800  | -3.59770500 |
| H | -1 | -3.77154300 | -11.30201700 | -4.40308300 |
| H | -1 | -4.90335700 | -1.31096100  | -3.68174400 |
| H | -1 | -6.37962100 | -2.87241400  | -4.96122800 |
| H | -1 | -4.98140500 | -4.11856500  | -0.44269300 |
| H | -1 | -9.55905800 | -7.54259600  | -3.40623900 |
| H | -1 | -7.68428400 | -6.71157100  | -7.18096000 |
| H | -1 | -6.33945100 | -4.94603800  | -6.02748100 |
| H | -1 | 6.43039900  | 1.67569300   | 0.29850800  |
| H | -1 | 12.79278200 | 1.75379700   | 0.69074900  |
| H | -1 | 12.73707200 | -1.91223500  | 2.92871900  |
| H | -1 | 10.28223300 | -1.57264100  | 3.26061100  |
| H | -1 | 8.54890600  | -0.38243500  | 4.19917800  |
| H | -1 | 6.06709200  | -0.08395800  | 4.19223400  |
| H | -1 | 2.30291400  | 8.05628500   | -1.82860300 |
| H | -1 | 2.75186300  | 5.86467700   | -0.70150500 |
| H | -1 | -1.12464000 | 6.16074900   | 1.10516700  |
| H | -1 | 0.90730600  | 8.89660400   | -3.54233000 |

|   |    |             |             |             |
|---|----|-------------|-------------|-------------|
| H | -1 | 0.15946200  | 10.97754700 | -4.72584500 |
| H | -1 | -1.74565400 | 12.20182400 | -1.07985900 |
| N | -1 | -2.14591200 | -7.19799500 | -2.53810300 |
| N | -1 | -3.55527400 | -9.56424700 | -3.31516500 |
| N | -1 | -3.00357500 | -3.92891900 | -5.51211900 |
| N | -1 | -4.10199700 | -5.72827200 | -7.35795800 |
| N | -1 | -6.05907700 | -4.67212500 | -2.11246200 |
| N | -1 | -8.14576800 | -6.04503000 | -3.38367500 |
| N | -1 | 10.96031900 | 1.20792000  | 1.45215800  |
| N | -1 | 8.20407000  | 1.06159700  | 1.15582100  |
| N | -1 | -0.75007600 | 10.40084200 | -0.99699500 |
| N | -1 | -0.60927000 | 7.73367400  | -0.13132600 |
| N | -1 | -5.15717600 | 1.59523900  | 6.74622900  |
| N | -1 | -7.16894500 | 2.18095200  | 8.53712200  |
| N | -1 | -3.57728900 | -1.95607700 | 7.05526800  |
| N | -1 | -4.77500700 | -1.78776200 | 9.60579700  |
| N | -1 | 7.30963500  | -3.25817500 | 2.52872200  |
| N | -1 | 9.94396300  | -4.26459300 | 2.61142900  |
| N | -1 | 7.66127300  | -2.34958400 | -1.94553800 |
| N | -1 | 10.36236600 | -2.60782100 | -2.82910100 |
| N | -1 | 0.38480800  | 8.43110000  | -6.21142600 |
| N | -1 | 0.82465100  | 6.36287200  | -4.28270500 |
| N | -1 | -3.69233600 | 6.05140100  | -3.10520700 |
| N | -1 | -4.96663600 | 8.33026300  | -4.09894000 |
| O | 0  | 1.68179300  | 0.59980900  | 4.78630100  |
| C | 0  | 0.68638500  | 1.42413200  | 5.25129900  |
| H | 0  | 0.71464500  | 2.43017100  | 4.78486700  |
| H | 0  | -0.32747000 | 1.03585600  | 5.04027800  |
| C | 0  | 0.67490600  | 1.69555300  | 6.75257100  |
| O | 0  | -0.17604900 | 2.37301700  | 7.30207600  |
| O | 0  | 1.67754500  | 1.09876500  | 7.42899900  |
| H | 0  | 1.55649200  | 1.32777300  | 8.37148100  |
| H | 0  | 2.46615000  | 0.53447600  | 5.33595100  |

Sum of electronic and thermal Free Energies = -13352.466364 (Hartree/Particle).

**Table S23:** DFT-optimized geometry of  $f\text{-[Ce}^{\text{III}}(\text{H}_2\text{C-COOH)-Ce}^{\text{III}}]^{2-}$  (doublet), computed at the UB3LYP-D3/ 6-31G\* (HCNO)/ MWB28 (Ce) level in water solvent using PCM.

| Atom |    | x           | y           | z           |
|------|----|-------------|-------------|-------------|
| Ce   | -1 | 1.38445400  | -2.18427600 | -0.58906200 |
| Ce   | 0  | -0.98218100 | 1.82337300  | 1.86966100  |
| Ce   | -1 | -1.74409600 | -1.65144400 | 1.51517400  |
| Ce   | -1 | 2.16541200  | 1.55438900  | -0.13832700 |
| Ce   | -1 | -1.24939600 | 0.44094600  | -1.42246900 |
| Ce   | 0  | 1.68351300  | -0.66709800 | 2.89422700  |
| O    | -1 | -4.64304500 | 13.14186100 | -4.51545600 |
| C    | -1 | -4.14715600 | 10.82053500 | -2.88286100 |
| C    | -1 | -3.88238400 | 9.62694000  | -2.22062600 |
| O    | -1 | -6.09827800 | -9.96982400 | -7.74206900 |
| C    | -1 | -4.03725800 | -8.34122000 | -6.63140700 |
| C    | -1 | -3.17621900 | -7.43589600 | -6.02522300 |
| O    | -1 | 14.12949100 | -4.02758000 | 0.32541400  |
| C    | -1 | 11.29241200 | -4.22288000 | 0.19521600  |
| C    | -1 | 9.90603300  | -4.17056800 | 0.23394000  |



|   |    |              |              |             |
|---|----|--------------|--------------|-------------|
| O | -1 | 14.81410000  | 0.42805700   | 0.51959400  |
| C | -1 | 12.26243500  | 1.01190300   | 1.37047000  |
| O | -1 | -6.80295200  | 1.15124600   | 12.73699300 |
| C | -1 | -4.75111300  | 0.64443000   | 10.81839500 |
| C | -1 | -3.86997000  | 0.33369600   | 9.79010300  |
| O | -1 | -9.24937000  | -8.65950100  | -7.27582000 |
| C | -1 | -7.78019300  | -6.44586400  | -6.17176500 |
| C | -1 | -7.04955000  | -5.46226900  | -5.51633000 |
| C | -1 | -2.26438600  | 9.32820800   | -6.32779800 |
| C | -1 | -1.95771800  | 8.12624000   | -5.70501500 |
| O | -1 | -2.33767300  | 13.61967400  | -2.82146400 |
| C | -1 | -1.15497400  | 11.51613100  | -1.48301000 |
| C | -1 | 12.19302000  | -0.82699300  | -1.52080600 |
| C | -1 | 10.82652600  | -0.58579600  | -1.45314300 |
| O | -1 | -7.68468500  | -11.21448200 | -5.08669300 |
| C | -1 | -6.30567200  | -9.23090600  | -3.57525000 |
| C | -1 | -5.54761400  | -8.29400700  | -2.88569900 |
| O | -1 | -9.97515100  | 0.61011300   | 12.18072600 |
| C | -1 | -8.71540400  | -0.00483100  | 9.64995800  |
| C | -1 | -7.89027400  | -0.21707900  | 8.55241900  |
| O | -1 | 14.40363500  | -3.38385900  | -2.88393300 |
| C | -1 | 11.69561800  | -2.77564500  | -2.83068900 |
| O | -1 | -5.73462300  | -12.27526400 | -5.49362900 |
| C | -1 | -4.27134400  | -10.41769300 | -4.03678300 |
| O | -1 | -9.75767500  | 2.80365000   | 11.71490000 |
| C | -1 | -7.99257100  | 2.28512800   | 9.63268500  |
| O | -1 | -1.32838800  | 13.09328000  | -4.77288300 |
| C | -1 | -0.06920300  | 10.85705800  | -3.51965300 |
| C | -1 | 0.36049600   | 9.71027500   | -2.86488700 |
| O | -1 | 15.00142400  | -1.35848900  | 1.88576900  |
| C | -1 | 12.23070400  | -1.04196000  | 2.61106000  |
| C | -1 | 10.86830200  | -0.84322600  | 2.80388400  |
| C | -1 | 0.08784800   | 9.65774300   | -6.67117400 |
| O | -1 | -10.17581400 | -9.03890100  | -5.25793500 |
| C | -1 | -8.82506000  | -6.94353800  | -4.06924600 |
| O | -1 | -7.59517800  | -0.94173500  | 12.45291900 |
| C | -1 | -5.62995700  | -1.58108800  | 10.61594500 |
| O | -1 | 14.03263800  | -4.05030700  | 2.58189400  |
| C | -1 | 11.27594000  | -4.32257700  | 2.59315100  |
| O | -1 | -5.55636500  | 11.81991800  | -6.09417400 |
| C | -1 | -5.20991900  | 9.52676400   | -4.60255500 |
| O | -1 | -6.86128300  | -8.20323600  | -8.92558900 |
| C | -1 | -4.88510600  | -6.52864400  | -7.95586000 |
| O | -1 | 0.15000000   | -4.28875500  | -0.53758600 |
| C | -1 | -1.39285600  | -6.26133900  | -1.91388500 |
| O | -1 | -2.82888800  | 1.37223500   | 3.37677100  |
| C | -1 | -4.35913300  | 1.40365800   | 5.74825300  |
| O | -1 | 0.09846700   | 4.08296300   | 1.78425200  |
| C | -1 | 1.81660400   | 6.41045500   | -0.42668100 |
| C | -1 | 1.56138800   | 7.62806800   | -1.04427300 |
| O | -1 | 3.56475000   | -1.66943000  | -1.56800300 |
| C | -1 | 6.36060100   | -2.09705000  | -1.79804700 |
| O | -1 | -3.47310100  | -0.75083600  | 2.98340500  |
| C | -1 | -5.57731000  | -0.46057500  | 4.86080100  |
| C | -1 | -6.45359200  | -0.32919200  | 5.93113100  |
| O | -1 | 2.01185500   | 3.81830600   | 0.62616800  |
| C | -1 | -0.35612100  | 6.57142500   | 0.57858700  |
| O | -1 | 3.90051600   | 0.55358500   | -1.44147400 |
| C | -1 | 6.61038200   | 0.27779000   | -2.01220100 |
| C | -1 | 7.97960700   | 0.07192600   | -2.11331600 |

|   |    |             |             |             |
|---|----|-------------|-------------|-------------|
| O | -1 | -1.54824500 | -3.97292000 | 0.90873700  |
| C | -1 | -3.02578900 | -6.03761700 | -0.17279000 |
| C | -1 | -3.79859300 | -6.97172300 | -0.84731600 |
| O | -1 | -0.88531900 | -1.02204500 | -3.34372900 |
| C | -1 | -2.28185800 | -2.95756600 | -4.82876100 |
| O | -1 | 3.23800600  | -2.49825800 | 2.68610900  |
| C | -1 | 5.99508400  | -3.04772700 | 2.60487200  |
| O | -1 | -2.61223900 | 2.43017500  | -1.39101200 |
| C | -1 | -3.35041600 | 4.91604900  | -2.46477100 |
| O | -1 | -2.51866300 | 3.30135000  | 0.68417000  |
| C | -1 | -3.57947800 | 5.74524300  | -0.22845600 |
| C | -1 | -3.93225400 | 6.97316900  | -0.77663400 |
| O | -1 | 0.73731600  | -2.50852500 | -2.86346800 |
| C | -1 | -0.39476400 | -4.41673100 | -4.57246800 |
| C | -1 | -1.10559300 | -5.37387900 | -5.28531000 |
| O | -1 | 2.95857700  | -3.46720200 | 0.67025500  |
| C | -1 | 5.59399200  | -4.38920100 | 0.65466700  |
| C | -1 | 6.96026700  | -4.62944100 | 0.60456100  |
| O | -1 | -3.59319300 | -2.11422300 | 0.01924200  |
| C | -1 | -5.26599200 | -3.80484900 | -1.45293200 |
| O | -1 | 1.70368500  | 2.80917400  | -2.19503800 |
| C | -1 | 1.12442500  | 5.26351500  | -3.55415000 |
| O | -1 | 4.12278700  | 1.65920600  | 1.24981600  |
| C | -1 | 6.66332300  | 0.21174300  | 3.42042100  |
| C | -1 | 8.04349900  | 0.04282900  | 3.42008700  |
| O | -1 | -1.37289200 | -2.71820900 | 3.67542300  |
| C | -1 | -2.82996700 | -2.31566800 | 6.01684100  |
| O | -1 | -3.33048700 | -0.74241500 | -1.74768300 |
| C | -1 | -5.21055700 | -2.21490200 | -3.24526000 |
| C | -1 | -6.02043900 | -3.08311800 | -3.96825800 |
| O | -1 | 0.52713400  | -1.95532500 | 4.61910900  |
| C | -1 | -0.91861500 | -1.21059900 | 6.94695600  |
| C | -1 | -1.71192900 | -0.86706900 | 8.03538900  |
| O | -1 | 3.85777100  | 0.35935600  | 3.07043000  |
| C | -1 | 6.88083300  | 1.22483100  | 1.25833800  |
| O | -1 | -0.20655900 | 1.92615500  | -3.00118400 |
| C | -1 | -0.75078500 | 4.13947700  | -4.53781700 |
| C | -1 | -1.06526100 | 5.32981300  | -5.17670500 |
| O | -1 | 2.11823100  | -0.51231600 | 0.76065800  |
| O | -1 | -0.00149500 | 1.77204000  | -0.06785300 |
| O | -1 | -0.45600200 | -0.16789200 | 2.62413500  |
| O | -1 | -0.69405300 | -1.51128100 | -0.46410500 |
| O | -1 | 0.58273200  | -2.41770600 | 1.68390300  |
| O | -1 | 1.16686100  | -0.03094000 | -1.63276200 |
| O | -1 | 1.40960100  | 1.58953300  | 2.22695600  |
| O | -1 | -2.09285900 | 0.39232800  | 0.66566300  |
| C | -1 | -4.98267700 | 12.03359800 | -4.89618000 |
| C | -1 | -4.80513100 | 10.78049900 | -4.11573200 |
| C | -1 | -4.28787500 | 8.41918000  | -2.81000600 |
| C | -1 | -5.99226900 | -8.80640100 | -8.08790300 |
| C | -1 | -4.93768400 | -7.88353600 | -7.59664100 |
| C | -1 | -3.23689200 | -6.08791500 | -6.41604300 |
| C | -1 | 13.48209700 | -4.12668000 | 1.35255000  |
| C | -1 | 12.00473200 | -4.26994700 | 1.39532800  |
| C | -1 | 9.26894000  | -4.17717200 | 1.48526200  |
| C | -1 | 14.34988900 | -0.42092800 | 1.45877500  |
| C | -1 | 12.94687700 | -0.11901100 | 1.84503900  |
| C | -1 | 10.25809100 | 0.28337700  | 2.23192700  |
| C | -1 | -6.70473900 | 0.04375300  | 12.23502100 |
| C | -1 | -5.66011100 | -0.32689700 | 11.24566500 |

|   |    |              |              |             |
|---|----|--------------|--------------|-------------|
| C | -1 | -3.93545500  | -0.93953600  | 9.20347700  |
| C | -1 | -9.37931400  | -8.35713100  | -6.10063900 |
| C | -1 | -8.67758400  | -7.22623100  | -5.43751300 |
| C | -1 | -7.23197700  | -5.28608500  | -4.13648400 |
| C | -1 | -1.22717300  | 10.12442300  | -6.81879600 |
| C | -1 | -0.60934400  | 7.74855100   | -5.59916900 |
| C | -1 | -1.49953900  | 12.88724100  | -3.58450300 |
| C | -1 | -0.87024700  | 11.77267700  | -2.83212100 |
| C | -1 | -0.02469000  | 9.51698200   | -1.52837300 |
| C | -1 | 12.64992900  | -1.95132900  | -2.21286300 |
| C | -1 | 9.94908800   | -1.47536100  | -2.09368400 |
| C | -1 | -6.47590500  | -11.28787300 | -4.95474300 |
| C | -1 | -5.66363200  | -10.31806500 | -4.17445500 |
| C | -1 | -4.15686500  | -8.47975800  | -2.80784400 |
| C | -1 | -9.55355000  | 1.50053700   | 11.45718000 |
| C | -1 | -8.76794100  | 1.27272100   | 10.21793500 |
| C | -1 | -7.13663900  | 0.85544700   | 8.04694700  |
| C | -1 | -0.99601000  | -4.56661600  | -0.06920000 |
| C | -1 | -1.79826600  | -5.65064800  | -0.72001700 |
| C | -1 | -3.32191900  | -7.50134700  | -2.05610900 |
| C | -1 | -3.53772900  | 0.34142300   | 3.61463200  |
| C | -1 | -4.51003900  | 0.43180800   | 4.74803000  |
| C | -1 | -6.21913300  | 0.67392500   | 6.88477500  |
| C | -1 | 0.99272200   | 4.49420700   | 0.99024900  |
| C | -1 | 0.83067500   | 5.85095100   | 0.39082000  |
| C | -1 | 0.32473500   | 8.25411900   | -0.82374400 |
| C | -1 | 4.30276600   | -0.64056200  | -1.60755200 |
| C | -1 | 5.77150300   | -0.82552200  | -1.82916400 |
| C | -1 | 8.47850700   | -1.23755800  | -2.03307300 |
| C | -1 | -0.33413400  | -2.15574900  | -3.45755500 |
| C | -1 | -0.99617000  | -3.18082100  | -4.31731300 |
| C | -1 | -2.40450800  | -5.06807600  | -5.72182400 |
| C | -1 | 3.65792700   | -3.15766700  | 1.68431400  |
| C | -1 | 5.09283200   | -3.56171900  | 1.66363700  |
| C | -1 | 7.79023200   | -4.02721000  | 1.56349400  |
| C | -1 | -2.77527600  | 3.37184200   | -0.55777200 |
| C | -1 | -3.26233800  | 4.68693400   | -1.08425100 |
| C | -1 | -3.95815400  | 7.11228800   | -2.17292600 |
| C | -1 | -3.84871900  | -1.74485700  | -1.16767200 |
| C | -1 | -4.80410400  | -2.58197000  | -1.95959400 |
| C | -1 | -6.40583300  | -4.29992600  | -3.38408500 |
| C | -1 | 0.65359600   | 2.85572600   | -2.90520300 |
| C | -1 | 0.35826100   | 4.09792300   | -3.68819500 |
| C | -1 | -0.25762300  | 6.45412100   | -4.95106000 |
| C | -1 | 4.57174400   | 0.95703100   | 2.20860500  |
| C | -1 | 6.05556500   | 0.80791700   | 2.31249800  |
| C | -1 | 8.78189700   | 0.47650900   | 2.30760900  |
| C | -1 | -0.71879500  | -2.23788600  | 4.64644700  |
| C | -1 | -1.48390800  | -1.93582900  | 5.89559000  |
| C | -1 | -3.04980000  | -1.28938800  | 8.05873700  |
| H | -1 | 1.44121000   | 0.01420000   | -2.56292300 |
| H | -1 | 1.85997900   | 2.34224100   | 2.64046200  |
| H | -1 | 0.62038900   | -3.31702100  | 2.04744500  |
| C | -1 | 14.10766000  | -2.24639100  | -2.22585000 |
| O | -1 | 14.95502900  | -1.54406900  | -1.70232800 |
| H | -1 | 15.36874500  | -3.51529000  | -2.81802100 |
| H | -1 | -7.66425200  | -8.75969800  | -8.97234000 |
| H | -1 | -6.33858800  | -12.84416000 | -6.00780400 |
| H | -1 | -10.53336100 | -9.80475800  | -5.74660900 |
| H | -1 | 15.63555200  | 0.04702100   | 0.15388500  |

|   |    |              |              |             |
|---|----|--------------|--------------|-------------|
| H | -1 | -2.91999300  | 14.12207600  | -3.42509100 |
| C | -1 | -1.56611700  | 11.43331200  | -7.43624400 |
| O | -1 | -2.70273800  | 11.85508700  | -7.55573300 |
| O | -1 | -0.48139500  | 12.10463600  | -7.86988700 |
| H | -1 | -0.79249300  | 12.95672700  | -8.23037100 |
| H | -1 | -5.56328400  | 12.67124400  | -6.57210300 |
| H | -1 | -10.23959700 | 2.86620000   | 12.56253700 |
| H | -1 | -8.38979600  | -0.54216100  | 12.86622800 |
| H | -1 | 14.93920700  | -3.70267500  | 2.47448400  |
| H | -1 | 0.12459400   | -0.92642000  | 6.90733200  |
| H | -1 | -1.29528600  | -0.30862000  | 8.86644500  |
| H | -1 | -3.29768400  | -2.87411000  | 5.21187200  |
| H | -1 | -3.17788100  | 1.07886200   | 9.41524700  |
| H | -1 | -4.76615500  | 1.62970900   | 11.27193800 |
| H | -1 | -6.31639800  | -2.36238000  | 10.92905200 |
| H | -1 | 5.62560800   | -2.41129100  | 3.40282800  |
| H | -1 | 7.38028100   | -5.26754000  | -0.16451300 |
| H | -1 | 4.91790900   | -4.81572900  | -0.07836700 |
| H | -1 | 11.79538700  | -4.38586300  | 3.54542200  |
| H | -1 | 11.83435100  | -4.18625500  | -0.74092600 |
| H | -1 | 9.33248800   | -4.05097600  | -0.67851600 |
| H | -1 | 5.73165100   | -2.97174400  | -1.66686900 |
| H | -1 | 12.01354100  | -3.65429700  | -3.38531700 |
| H | -1 | 12.90988100  | -0.17339700  | -1.03879500 |
| H | -1 | 10.44011200  | 0.25148400   | -0.88249500 |
| H | -1 | 8.65267200   | 0.90898000   | -2.25879700 |
| H | -1 | 6.18561600   | 1.27398600   | -2.06487200 |
| H | -1 | 1.99551600   | 5.25659500   | -2.90731900 |
| H | -1 | 0.92025200   | 10.24679300  | -7.04668600 |
| H | -1 | -3.28659300  | 9.66843800   | -6.43360000 |
| H | -1 | -2.73947000  | 7.50206300   | -5.28472900 |
| H | -1 | -1.91990500  | 5.39161800   | -5.84059700 |
| H | -1 | -1.35226600  | 3.24854200   | -4.67766300 |
| H | -1 | -3.54495200  | 5.59883000   | 0.84534000  |
| H | -1 | -4.19153900  | 7.80650000   | -0.13377700 |
| H | -1 | -3.12042700  | 4.10850800   | -3.15194000 |
| H | -1 | -5.74867700  | 9.45686500   | -5.54367200 |
| H | -1 | -3.82739400  | 11.77356200  | -2.47821700 |
| H | -1 | -3.32227900  | 9.62759600   | -1.29245700 |
| H | -1 | -3.53420000  | 2.10925100   | 5.68574900  |
| H | -1 | -5.72451500  | -1.22348600  | 4.10420500  |
| H | -1 | -7.31818600  | -0.97878700  | 6.00932600  |
| H | -1 | -8.00420000  | 3.28790400   | 10.05127200 |
| H | -1 | -9.29015200  | -0.81325900  | 10.08871300 |
| H | -1 | -7.80165700  | -1.20802600  | 8.12327800  |
| H | -1 | 0.60553200   | -4.61473400  | -4.20314100 |
| H | -1 | -0.66499700  | -6.34062200  | -5.50002100 |
| H | -1 | -2.52820500  | -7.74953300  | -5.21379800 |
| H | -1 | -4.05718800  | -9.38334500  | -6.34007900 |
| H | -1 | -5.55231500  | -6.14107800  | -8.72092000 |
| H | -1 | -2.76449200  | -2.00237000  | -4.64930700 |
| H | -1 | -0.44010900  | -5.98729300  | -2.35672900 |
| H | -1 | -4.75296700  | -7.29038400  | -0.44460400 |
| H | -1 | -3.35933600  | -5.59922800  | 0.76054600  |
| H | -1 | -6.01466000  | -7.41964700  | -2.44412100 |
| H | -1 | -7.37984900  | -9.13133900  | -3.67160900 |
| H | -1 | -3.73816000  | -11.25083300 | -4.48708000 |
| H | -1 | -4.88467800  | -1.26931400  | -3.66408700 |
| H | -1 | -6.35467500  | -2.81891500  | -4.96501700 |
| H | -1 | -4.97027100  | -4.11108500  | -0.45516300 |

|   |    |             |             |             |
|---|----|-------------|-------------|-------------|
| H | -1 | -9.53363500 | -7.50905600 | -3.47029200 |
| H | -1 | -7.64708600 | -6.63594900 | -7.22961500 |
| H | -1 | -6.30834200 | -4.88110400 | -6.05297600 |
| H | -1 | 6.43183200  | 1.68861000  | 0.38607400  |
| H | -1 | 12.79274700 | 1.77014500  | 0.80078500  |
| H | -1 | 12.73394500 | -1.91939900 | 2.99969700  |
| H | -1 | 10.27757700 | -1.58625700 | 3.32679500  |
| H | -1 | 8.53961600  | -0.40810300 | 4.27197500  |
| H | -1 | 6.05747600  | -0.11252700 | 4.25973200  |
| H | -1 | 2.30376000  | 8.08640400  | -1.68755400 |
| H | -1 | 2.75157100  | 5.88354200  | -0.58215100 |
| H | -1 | -1.13140000 | 6.15588400  | 1.21433500  |
| H | -1 | 0.91294300  | 8.94312400  | -3.39705100 |
| H | -1 | 0.16656500  | 11.03556700 | -4.56105500 |
| H | -1 | -1.75241200 | 12.21897000 | -0.90884900 |
| N | -1 | -2.12390600 | -7.16481600 | -2.57332100 |
| N | -1 | -3.52771700 | -9.52440100 | -3.38013300 |
| N | -1 | -2.97548500 | -3.86551500 | -5.51553800 |
| N | -1 | -4.06542800 | -5.64656700 | -7.38401400 |
| N | -1 | -6.04159000 | -4.64825000 | -2.13434800 |
| N | -1 | -8.12226800 | -6.01012900 | -3.42709500 |
| N | -1 | 10.95838300 | 1.21406800  | 1.55014000  |
| N | -1 | 8.20333600  | 1.06760100  | 1.24288700  |
| N | -1 | -0.75491100 | 10.41840100 | -0.84162600 |
| N | -1 | -0.61376900 | 7.74240200  | -0.00370900 |
| N | -1 | -5.17744600 | 1.52620800  | 6.79308200  |
| N | -1 | -7.19599800 | 2.09056100  | 8.58320000  |
| N | -1 | -3.59425900 | -2.02629200 | 7.06996400  |
| N | -1 | -4.80083000 | -1.88637000 | 9.61803500  |
| N | -1 | 7.30955100  | -3.26750200 | 2.56702000  |
| N | -1 | 9.94481600  | -4.27159900 | 2.64806100  |
| N | -1 | 7.67525400  | -2.31125700 | -1.89616700 |
| N | -1 | 10.37964400 | -2.55692200 | -2.77320500 |
| N | -1 | 0.40007700  | 8.50523400  | -6.07267900 |
| N | -1 | 0.83591100  | 6.41726200  | -4.16443100 |
| N | -1 | -3.68465900 | 6.08798100  | -3.00567900 |
| N | -1 | -4.95837600 | 8.37569900  | -3.97961600 |
| C | 0  | 1.85614800  | 0.20870700  | 4.90498900  |
| C | 0  | 0.87959200  | 1.35770100  | 5.34819200  |
| O | 0  | 0.02937400  | 1.76221900  | 4.58035700  |
| O | 0  | 0.98435000  | 1.88915500  | 6.56835700  |
| H | 0  | 0.45191900  | 2.51560100  | 6.80999700  |
| H | 0  | 1.74463800  | -0.58989000 | 5.60834400  |
| H | 0  | 2.85273800  | 0.58620000  | 5.00095200  |

Sum of electronic and thermal Free Energies = -13276.650649 (Hartree/Particle).

**Table S24:** DFT-optimized geometry of CO<sub>2</sub> (singlet), computed at the B3LYP-D3/ 6-31G\* (CO) level in water solvent using PCM.

| Atom | x          | y          | z           |
|------|------------|------------|-------------|
| C    | 0.00000000 | 0.00000000 | 0.00000000  |
| O    | 0.00000000 | 0.00000000 | 1.16909400  |
| O    | 0.00000000 | 0.00000000 | -1.16909400 |

Sum of electronic and thermal Free Energies = -188.592753 (Hartree/Particle).

**Table S25:** DFT-optimized geometry of  $\text{H}_2\text{O}$  (singlet), computed at the B3LYP-D3/ 6-31G\* (HO) level in water solvent using PCM.

| Atom | x          | y           | z           |
|------|------------|-------------|-------------|
| O    | 0.00000000 | 0.00000000  | 0.12073800  |
| H    | 0.00000000 | 0.75883000  | -0.48295200 |
| H    | 0.00000000 | -0.75883000 | -0.48295200 |

Sum of electronic and thermal Free Energies = -76.412854 (Hartree/Particle).

**Table S26:** DFT-optimized geometry of  $\text{H}_2\text{O}^+$  (doublet), computed at the UB3LYP-D3/ 6-31G\* (HO) level in water solvent using PCM.

| Atom | x          | y           | z           |
|------|------------|-------------|-------------|
| O    | 0.00000000 | 0.00000000  | 0.11866100  |
| H    | 0.00000000 | 0.81561500  | -0.47464200 |
| H    | 0.00000000 | -0.81561500 | -0.47464200 |

Sum of electronic and thermal Free Energies = -76.088041 (Hartree/Particle).

**Table S27:** DFT-optimized geometry of  $\text{OH}^{\cdot}$  (doublet), computed at the UB3LYP-D3/ 6-31G\* (HO) level in water solvent using PCM.

| Atom | x          | y          | z           |
|------|------------|------------|-------------|
| O    | 0.00000000 | 0.00000000 | 0.10922700  |
| H    | 0.00000000 | 0.00000000 | -0.87381300 |

Sum of electronic and thermal Free Energies = -75.736849 (Hartree/Particle).

**Table S28:** DFT-optimized geometry of  $\text{CH}_3\text{COOH}$  (singlet), computed at the B3LYP-D3/ 6-31G\* (HCO) level in water solvent using PCM.

| Atom | x           | y           | z           |
|------|-------------|-------------|-------------|
| C    | -1.04953300 | -0.92686300 | 0.00000000  |
| H    | -2.04231600 | -0.47652700 | 0.00000000  |
| H    | -0.92743400 | -1.56240900 | 0.88304500  |
| H    | -0.92743400 | -1.56240900 | -0.88304500 |
| C    | 0.00000000  | 0.15461300  | 0.00000000  |

|   |             |             |            |
|---|-------------|-------------|------------|
| O | -0.20817800 | 1.35120300  | 0.00000000 |
| O | 1.24794300  | -0.36915600 | 0.00000000 |
| H | 1.87626900  | 0.37846700  | 0.00000000 |

---

Sum of electronic and thermal Free Energies = -229.056692 (Hartree/Particle).

## References:

- (1) Xu, H.; Rebollar, D.; He, H.; Chong, L.; Liu, Y.; Liu, C.; Sun, C.-J.; Li, T.; Muntean, J. V.; Winans, R. E.; Liu, D.-J.; Xu, T. *Nat. Energy* **2020**, *5*, 623.
- (2) Gaussian09, R. A. *Inc., Wallingford CT* **2009**, *121*, 150.
- (3) Miehlich, B.; Savin, A.; Stoll, H.; Preuss, H. *Chem. Phys. Lett.* **1989**, *157*, 200.
- (4) Grimme, S.; Antony, J.; Ehrlich, S.; Krieg, H. *Chem. Phys.* **2010**, *132*, 154104.
- (5) Grimme, S. *J. Comput. Chem.* **2004**, *25*, 1463.
- (6) Grimme, S. *J. Comput. Chem.* **2006**, *27*, 1787.
- (7) Becke, A. D. *Chem. Phys.* **1993**, *98*, 1372.
- (8) Lee, C.; Yang, W.; Parr, R. G. *Phys. Rev. B* **1988**, *37*, 785.
- (9) Hay, P. J.; Wadt, W. R. *Chem. Phys.* **1985**, *82*, 270.
- (10) Wadt, W. R.; Hay, P. J. *Chem. Phys.* **1985**, *82*, 284.
- (11) Dolg, M.; Stoll, H.; Preuss, H. *Chem. Phys.* **1989**, *90*, 1730.
- (12) Tomasi, J.; Mennucci, B.; Cammi, R. *Chem. Rev.* **2005**, *105*, 2999.
- (13) Dennington, R.; Keith, T.; Millam, J. **2009**.
- (14) Sun, S.; Watanabe, M.; Wu, J.; An, Q.; Ishihara, T. *J. Am. Chem. Soc.* **2018**, *140*, 6474.
- (15) Zhu, S.; Li, X.; Jiao, X.; Shao, W.; Li, L.; Zu, X.; Hu, J.; Zhu, J.; Yan, W.; Wang, C.; Sun, Y.; Xie, Y. *Nano Lett.* **2021**, *21*, 2324.
- (16) Yu, F.; Jing, X.; Wang, Y.; Sun, M.; Duan, C. *Angew. Chem. Int. Ed.* **2021**, *60*, 24849.
- (17) Zhu, J.; Shao, W.; Li, X.; Jiao, X.; Zhu, J.; Sun, Y.; Xie, Y. *J. Am. Chem. Soc.* **2021**, *143*, 18233.
